# Supplementary material for: Protein Changes in Shade and Sun Haberlea rhodopensis Leaves during Dehydration at Optimal and Low Temperatures
Source: Plants (Basel). 2023 Jan 15;12(2):401. doi: 10.3390/plants12020401 (PMC9861795; doi:10.3390/plants12020401)
Supplement: Supplementary file 1 [file plants-12-00401-s001.zip › Table S1.xlsx]

## Sheet: NCBI peptide based results
Union: sarvari_eva/NCBI HabRho DORHY T10
Band 8 control
ID: 1 (120523_06_SE_6a_3_ctrl)
Number of Proteins (After Homology Filtering): 23
Number of Peptides: 43
Search 1 Number of Data Spectra: 1224
Search 1 Proteins (Pre Homology Filtering): 54
Database: User Protein (48439/48439 entries searched)
[+] Original Search Parameters 1
Average Parent Error: -0.01
3 * StdDev: 0.47
1 Acc. #: 164 Species: UNREADABLE Name: gi|1092181945|gb|AOY41463.1| ribulose 1,5-bisphosphate carboxylase/oxygenase large subunit (chloroplast) [Haberlea rhodopensis]
Version: 1
Protein MW: 53515.3 Protein pI: 6.1 Protein Length: 483 Index: 164
Num Unique	% Cov	Best Disc Score	Best Expect Val
6	9.9	2.78	0.0014
m/z	z	Da	DB Peptide	Variable Mods	Fraction	RT	Start	End	Score	Expect	# in DB
704.339	2	0.0014	(K)LTYYTPEYETK(D)		120523_06_SE_6a_3_ctrl	23.4216	22	32	25.3	0.0091	2
804.076	3	0.01	(K)LTYYTPEYETKDTDILAAFR(V)		120523_06_SE_6a_3_ctrl	55.5055	22	41	24.2	0.057	2
511.254	2	-0.015	(K)DTDILAAFR(V)		120523_06_SE_6a_3_ctrl	47.5772	33	41	35.9	0.0014	5
800.425	2	0.51	(R)NEGRDLAAEGNAIIR(E)		120523_06_SE_6a_3_ctrl	39.1515	432	446	17.5	7.8	4
571.781	2	-0.031	(R)DLAAEGNAIIR(E)		120523_06_SE_6a_3_ctrl	28.9365	436	446	44.6	0.024	4
773.855	2	-0.017	(K)WSPELAAACEVWK(E)		120523_06_SE_6a_3_ctrl	48.7915	451	463	23.5	0.0033	5
2 Acc. #: 161 Species: UNREADABLE Name: gi|1092181948|gb|AOY41466.1| photosystem II protein D2 (chloroplast) [Haberlea rhodopensis]
Version: 1
Protein MW: 39593.9 Protein pI: 5.3 Protein Length: 353 Index: 161
Num Unique	% Cov	Best Disc Score	Best Expect Val
3	12.7	4.14	6.5e-06
m/z	z	Da	DB Peptide	Variable Mods	Fraction	RT	Start	End	Score	Expect	# in DB
614.294	2	-0.0099	(R)AYDFVSQEIR(A)		120523_06_SE_6a_3_ctrl	31.2275	296	305	36.5	0.0039	4
774.35	2	0.00088	(R)AAEDPEFETFYTK(N)		120523_06_SE_6a_3_ctrl	34.5935	306	318	49.3	6.5e-06	4
879.724	3	-0.04	(R)AWMATQDQPHENLIFPEEVLPR(G)	Oxidation@3	120523_06_SE_6a_3_ctrl	53.1929	328	349	19.6	0.21	2
3 Acc. #: 168 Species: UNREADABLE Name: gi|1092181941|gb|AOY41459.1| ATP synthase CF1 alpha subunit (chloroplast) [Haberlea rhodopensis]
Version: 1
Protein MW: 55354.6 Protein pI: 5.2 Protein Length: 507 Index: 168
Num Unique	% Cov	Best Disc Score	Best Expect Val
2	5.7	3.18	9.7e-05
m/z	z	Da	DB Peptide	Variable Mods	Fraction	RT	Start	End	Score	Expect	# in DB
806.929	2	-0.026	(K)IVNTGTVLQVGDGIAR(I)		120523_06_SE_6a_3_ctrl	38.3019	26	41	44.2	9.7e-05	4
708.848	2	-0.047	(R)IAQIPVSEAYLGR(V)		120523_06_SE_6a_3_ctrl	36.6081	95	107	31.2	0.0011	5
4 Acc. #: 24078 Species: UNREADABLE Name: gi|1024014117|gb|KZV34989.1| thylakoid lumenal 15 kDa protein 1, chloroplastic-like [Dorcoceras hygrometricum]
Version: 1
Protein MW: 21032.1 Protein pI: 8.7 Protein Length: 195 Index: 24078
Num Unique	% Cov	Best Disc Score	Best Expect Val
3	28.2	2.28	0.00019
m/z	z	Da	DB Peptide	Variable Mods	Fraction	RT	Start	End	Score	Expect	# in DB
1150.05	2	-0.0095	(K)LLGASFFDADLTGADLSDSDLR(G)		120523_06_SE_6a_3_ctrl	65.9713	99	120	33.8	0.00019	1
688.617	3	-0.054	(K)GSTITGADFTDVPLRDDQR(V)		120523_06_SE_6a_3_ctrl	34.8829	152	170	24.3	0.043	1
714.86	2	0.0021	(K)VADGVNPVTGNETR(E)		120523_06_SE_6a_3_ctrl	13.0867	176	189	36.2	0.00047	1
5 Acc. #: 24022 Species: UNREADABLE Name: gi|1024014198|gb|KZV35045.1| hypothetical protein F511_04350 [Dorcoceras hygrometricum]
Version: 1
Protein MW: 11409.5 Protein pI: 11.5 Protein Length: 103 Index: 24022
Num Unique	% Cov	Best Disc Score	Best Expect Val
3	29.1	1.63	0.0036
m/z	z	Da	DB Peptide	Variable Mods	Fraction	RT	Start	End	Score	Expect	# in DB
663.425	2	0.045	(R)DNIQGITKPAIR(R)		120523_06_SE_6a_3_ctrl	18.9697	25	36	34.3	0.046	6
590.815	2	0.00072	(R)ISGLIYEETR(G)		120523_06_SE_6a_3_ctrl	26.2491	47	56	34.6	0.0036	6
502.286	2	-0.015	(K)IFLENVIR(D)		120523_06_SE_6a_3_ctrl	43.8038	61	68	30.5	0.19	6
6 Acc. #: 42548 Species: UNREADABLE Name: gi|1023969271|gb|KZV16519.1| putative carboxylesterase 8-like [Dorcoceras hygrometricum]
Version: 1
Protein MW: 40625.6 Protein pI: 7.2 Protein Length: 364 Index: 42548
Num Unique	% Cov	Best Disc Score	Best Expect Val
1	2.7	2.56	0.00012
m/z	z	Da	DB Peptide	Variable Mods	Fraction	RT	Start	End	Score	Expect	# in DB
553.747	2	-0.012	(K)GDYGDPLVDR(S)		120523_06_SE_6a_3_ctrl	20.7137	295	304	38.3	0.00012	1
7 Acc. #: 24358 Species: UNREADABLE Name: gi|1024013828|gb|KZV34709.1| hypothetical protein F511_00611 [Dorcoceras hygrometricum]
Version: 1
Protein MW: 19845.0 Protein pI: 5.3 Protein Length: 190 Index: 24358
Num Unique	% Cov	Best Disc Score	Best Expect Val
1	6.3	2.48	0.0022
m/z	z	Da	DB Peptide	Variable Mods	Fraction	RT	Start	End	Score	Expect	# in DB
650.836	2	-0.035	(K)AEDLGLLSLLEK(T)		120523_06_SE_6a_3_ctrl	66.4277	113	124	42.3	0.0022	1
8 Acc. #: 5900 Species: UNREADABLE Name: gi|1024055000|gb|KZV53167.1| photosystem I reaction center subunit II, chloroplastic-like [Dorcoceras hygrometricum]
Version: 1
Protein MW: 22949.5 Protein pI: 9.7 Protein Length: 212 Index: 5900
Num Unique	% Cov	Best Disc Score	Best Expect Val
1	7.1	2.45	4.4e-05
m/z	z	Da	DB Peptide	Variable Mods	Fraction	RT	Start	End	Score	Expect	# in DB
841.878	2	-0.02	(K)EQIFEMPTGGAAIMR(Q)	Oxidation@6;Oxidation@14	120523_06_SE_6a_3_ctrl	27.1087	111	125	35.5	4.4e-05	1
9 Acc. #: 13981 Species: UNREADABLE Name: gi|1024040408|gb|KZV45086.1| nucleoside diphosphate kinase 1-like [Dorcoceras hygrometricum]
Version: 1
Protein MW: 16342.8 Protein pI: 6.8 Protein Length: 148 Index: 13981
Num Unique	% Cov	Best Disc Score	Best Expect Val
2	16.2	1.33	0.0032
m/z	z	Da	DB Peptide	Variable Mods	Fraction	RT	Start	End	Score	Expect	# in DB
933.953	2	-0.0049	(-)MEQTFIMIKPDGVQR(G)	Acetyl+Oxidation@1;Oxidation@7	120523_06_SE_6a_3_ctrl	35.2579	1	15	29.5	0.0032	1
457.242	2	-0.035	(R)GLVGEIIGR(F)		120523_06_SE_6a_3_ctrl	36.7367	16	24	31.4	0.027	1
10 Acc. #: 44142 Species: UNREADABLE Name: gi|1023966559|gb|KZV14925.1| ribulose bisphosphate carboxylase small chain, chloroplastic-like [Dorcoceras hygrometricum]
Version: 1
Protein MW: 20304.7 Protein pI: 9.3 Protein Length: 180 Index: 44142
Num Unique	% Cov	Best Disc Score	Best Expect Val
4	25	0.68	0.0091
m/z	z	Da	DB Peptide	Variable Mods	Fraction	RT	Start	End	Score	Expect	# in DB
1075.15	2	0.053	(R)KFETLSYLPPLTEEQLLK(Q)		120523_06_SE_6a_3_ctrl	58.9447	67	84	21.4	0.016	1
1011	2	-0.046	(K)FETLSYLPPLTEEQLLK(Q)		120523_06_SE_6a_3_ctrl	63.6223	68	84	25.8	0.0091	1
695.409	2	0.015	(R)LKLIPCLEFEK(R)		120523_06_SE_6a_3_ctrl	48.5114	92	102	24.2	0.075	1
905.427	2	-0.018	(R)QVQCISFIAYKPPGSD(-)		120523_06_SE_6a_3_ctrl	42.3416	165	180	26.6	0.012	1
11 Acc. #: 138 Species: UNREADABLE Name: gi|1092181971|gb|AOY41489.1| ATP synthase CF1 epsilon subunit (chloroplast) [Haberlea rhodopensis]
Version: 1
Protein MW: 14819.3 Protein pI: 6.7 Protein Length: 133 Index: 138
Num Unique	% Cov	Best Disc Score	Best Expect Val
2	18.8	1	0.0073
m/z	z	Da	DB Peptide	Variable Mods	Fraction	RT	Start	End	Score	Expect	# in DB
814.443	2	0.0069	(R)IGNNQITVLVNDAEK(G)		120523_06_SE_6a_3_ctrl	40.0915	69	83	23.8	0.025	4
890.19	3	0.071	(R)IGNNQITVLVNDAEKGSDINPEEAK(Q)		120523_06_SE_6a_3_ctrl	48.0921	69	93	29.5	0.0073	2
12 Acc. #: 134 Species: UNREADABLE Name: gi|1092181975|gb|AOY41493.1| ribosomal protein S18 (chloroplast) [Haberlea rhodopensis]
Version: 1
Protein MW: 12086.3 Protein pI: 11.9 Protein Length: 101 Index: 134
Num Unique	% Cov	Best Disc Score	Best Expect Val
1	11.9	1.54	0.0046
m/z	z	Da	DB Peptide	Variable Mods	Fraction	RT	Start	End	Score	Expect	# in DB
700.862	2	-0.049	(R)ILSLLPFLNNEK(Q)		120523_06_SE_6a_3_ctrl	67.6272	71	82	34.1	0.0046	5
13 Acc. #: 10266 Species: UNREADABLE Name: gi|1024047350|gb|KZV48801.1| acyl-activating enzyme 19-like, partial [Dorcoceras hygrometricum]
Version: 1
Protein MW: 80868.4 Protein pI: 5.6 Protein Length: 725 Index: 10266
Num Unique	% Cov	Best Disc Score	Best Expect Val
1	4.8	1.35	0.011
m/z	z	Da	DB Peptide	Variable Mods	Fraction	RT	Start	End	Score	Expect	# in DB
907.633	4	-0.56	(K)LHMALLSSNNALGTNSGSGGGLNELHGDMLLSNYR(V)	Oxidation@3=39	120523_06_SE_6a_3_ctrl	85.3766	557	591	33.7	0.011	1
14 Acc. #: 19451 Species: UNREADABLE Name: gi|1024025959|gb|KZV39616.1| hypothetical protein F511_02079 [Dorcoceras hygrometricum]
Version: 1
Protein MW: 31246.8 Protein pI: 5.6 Protein Length: 286 Index: 19451
Num Unique	% Cov	Best Disc Score	Best Expect Val
1	5.2	1.17	0.0022
m/z	z	Da	DB Peptide	Variable Mods	Fraction	RT	Start	End	Score	Expect	# in DB
878.38	2	-0.059	(K)STPFQPYSEVFGLQR(F)		120523_06_SE_6a_3_ctrl	52.0583	116	130	29.2	0.0022	2
15 Acc. #: 41237 Species: UNREADABLE Name: gi|1023972424|gb|KZV17830.1| hypothetical protein F511_01639 [Dorcoceras hygrometricum]
Version: 1
Protein MW: 33227.5 Protein pI: 5.9 Protein Length: 299 Index: 41237
Num Unique	% Cov	Best Disc Score	Best Expect Val
2	5.4	0.4	0.083
m/z	z	Da	DB Peptide	Variable Mods	Fraction	RT	Start	End	Score	Expect	# in DB
450.249	2	-0.02	(K)IVVELNGR(L)		120523_06_SE_6a_3_ctrl	19.118	230	237	19.9	0.11	3
474.233	2	7.1e-05	(K)DIEGWTAR(L)		120523_06_SE_6a_3_ctrl	21.229	254	261	27.5	0.083	1
16 Acc. #: 163 Species: UNREADABLE Name: gi|1092181946|gb|AOY41464.1| photosystem II CP43 chlorophyll apoprotein (chloroplast) [Haberlea rhodopensis]
Version: 1
Protein MW: 51910.3 Protein pI: 6.7 Protein Length: 473 Index: 163
Num Unique	% Cov	Best Disc Score	Best Expect Val
2	9.7	0.61	0.015
m/z	z	Da	DB Peptide	Variable Mods	Fraction	RT	Start	End	Score	Expect	# in DB
748.853	2	-0.0035	(R)SPTGEVIFGGETMR(F)	Oxidation@13	120523_06_SE_6a_3_ctrl	26.6692	344	357	18.4	0.34	4
1107.6	3	0.055	(R)SAEYMTHAPLGSLNSVGGVATEINAVNYVSPR(S)	Oxidation@5	120523_06_SE_6a_3_ctrl	53.1477	392	423	26.7	0.015	4
17 Acc. #: 2637 Species: UNREADABLE Name: gi|1024060589|gb|KZV56430.1| hypothetical protein F511_00427 [Dorcoceras hygrometricum]
Version: 1
Protein MW: 13977.2 Protein pI: 10.0 Protein Length: 133 Index: 2637
Num Unique	% Cov	Best Disc Score	Best Expect Val
2	24.1	0.42	0.026
m/z	z	Da	DB Peptide	Variable Mods	Fraction	RT	Start	End	Score	Expect	# in DB
472.785	2	0.016	(K)AGLQFPVGR(I)		120523_06_SE_6a_3_ctrl	30.3374	23	31	23.4	0.24	9
805.786	3	0.00024	(K)LLGDVTIANGGVMPNIHNLLLPK(K)	Oxidation@13	120523_06_SE_6a_3_ctrl	57.5995	98	120	25.8	0.026	3
18 Acc. #: 36368 Species: UNREADABLE Name: gi|1023984442|gb|KZV22699.1| Cytochrome c [Dorcoceras hygrometricum]
Version: 1
Protein MW: 12258.0 Protein pI: 9.4 Protein Length: 112 Index: 36368
Num Unique	% Cov	Best Disc Score	Best Expect Val
1	7.1	0.46	0.047
m/z	z	Da	DB Peptide	Variable Mods	Fraction	RT	Start	End	Score	Expect	# in DB
453.728	2	-0.04	(R)ADLIAYLK(E)		120523_06_SE_6a_3_ctrl	41.4706	101	108	27.2	0.047	1
19 Acc. #: 13317 Species: UNREADABLE Name: gi|1024042265|gb|KZV45750.1| hypothetical protein F511_40959 [Dorcoceras hygrometricum]
Version: 1
Protein MW: 12030.3 Protein pI: 10.6 Protein Length: 108 Index: 13317
Num Unique	% Cov	Best Disc Score	Best Expect Val
1	9.3	0.4	0.012
m/z	z	Da	DB Peptide	Variable Mods	Fraction	RT	Start	End	Score	Expect	# in DB
550.815	2	-0.0043	(K)LITPSVLSDR(L)		120523_06_SE_6a_3_ctrl	31.5311	60	69	24.3	0.012	2
20 Acc. #: 8743 Species: UNREADABLE Name: gi|1024050215|gb|KZV50324.1| Chlorophyll a-b binding protein 2 [Dorcoceras hygrometricum]
Version: 1
Protein MW: 27916.9 Protein pI: 5.1 Protein Length: 264 Index: 8743
Num Unique	% Cov	Best Disc Score	Best Expect Val
1	3	0.4	0.079
m/z	z	Da	DB Peptide	Variable Mods	Fraction	RT	Start	End	Score	Expect	# in DB
492.293	2	0.04	(K)FGEAVWFK(A)		120523_06_SE_6a_3_ctrl	41.6416	124	131	27.4	0.079	1
21 Acc. #: 23327 Species: UNREADABLE Name: gi|1024016039|gb|KZV35740.1| phosphatidylinositol 4-phosphate 5-kinase 9 [Dorcoceras hygrometricum]
Version: 1
Protein MW: 88899.6 Protein pI: 6.7 Protein Length: 788 Index: 23327
Num Unique	% Cov	Best Disc Score	Best Expect Val
1	3.8	0.07	0.2
m/z	z	Da	DB Peptide	Variable Mods	Fraction	RT	Start	End	Score	Expect	# in DB
835.323	4	-0.053	(R)NGMMHGFGVYTWSNGSCYVGTWTQGLKDGK(G)		120523_06_SE_6a_3_ctrl	63.3044	208	237	25.6	0.2	1
22 Acc. #: 716 Species: UNREADABLE Name: gi|1024063924|gb|KZV58351.1| ankyrin repeat-containing protein-like [Dorcoceras hygrometricum]
Version: 1
Protein MW: 63512.3 Protein pI: 9.2 Protein Length: 584 Index: 716
Num Unique	% Cov	Best Disc Score	Best Expect Val
1	5.3	0.03	0.2
m/z	z	Da	DB Peptide	Variable Mods	Fraction	RT	Start	End	Score	Expect	# in DB
838.015	4	-0.44	(K)HEWAAILVTLVGGVIMAGVLGTMTYYVVRSK(R)	Oxidation@16|23	120523_06_SE_6a_3_ctrl	38.7307	517	547	25.2	0.2	1
23 Acc. #: 39225 Species: UNREADABLE Name: gi|1023977537|gb|KZV19842.1| splicing factor 3B subunit 1-like [Dorcoceras hygrometricum]
Version: 1
Protein MW: 115019.7 Protein pI: 5.3 Protein Length: 1031 Index: 39225
Num Unique	% Cov	Best Disc Score	Best Expect Val
1	1.5	0.02	0.13
m/z	z	Da	DB Peptide	Variable Mods	Fraction	RT	Start	End	Score	Expect	# in DB
893.496	2	0.46	(K)LQDMLLIQILSLEKK(V)		120523_06_SE_6a_3_ctrl	56.5889	858	872	24.4	0.13	1
Band 8 8% RWC
ID: 2 (120523_07_SE_6_3)
Number of Proteins (After Homology Filtering): 32
Number of Peptides: 66
Search 1 Number of Data Spectra: 1419
Search 1 Proteins (Pre Homology Filtering): 54
Database: User Protein (48439/48439 entries searched)
[+] Original Search Parameters 1
Average Parent Error: 0.05
3 * StdDev: 0.51
1 Acc. #: 164 Species: UNREADABLE Name: gi|1092181945|gb|AOY41463.1| ribulose 1,5-bisphosphate carboxylase/oxygenase large subunit (chloroplast) [Haberlea rhodopensis]
Version: 1
Protein MW: 53515.3 Protein pI: 6.1 Protein Length: 483 Index: 164
Num Unique	% Cov	Best Disc Score	Best Expect Val
6	16.6	4.17	1.5e-06
m/z	z	Da	DB Peptide	Variable Mods	Fraction	RT	Start	End	Score	Expect	# in DB
704.364	2	0.027	(K)LTYYTPEYETK(D)		120523_07_SE_6_3	22.7626	22	32	28.2	0.0065	2
511.285	2	0.016	(K)DTDILAAFR(V)		120523_07_SE_6_3	47.1752	33	41	35.9	0.00087	5
733.395	2	0.014	(K)TFQGPPHGIQVER(D)		120523_07_SE_6_3	19.0497	147	159	18.9	0.23	4
729.317	3	-0.015	(R)GGLDFTKDDENVNSQPFMR(W)	Oxidation@18	120523_07_SE_6_3	30.9292	195	213	34	0.0054	4
976.117	2	0.087	(R)DITLGFVDLLRDDFIAK(D)		120523_07_SE_6_3	81.6046	340	356	47.1	1.5e-06	5
571.781	2	-0.031	(R)DLAAEGNAIIR(E)		120523_07_SE_6_3	28.3233	436	446	39.6	0.032	4
1-1 Acc. #: 48077 Species: UNREADABLE Name: gi|364283992|ref|YP_004940518.1| rbcL gene product (chloroplast) [Dorcoceras hygrometricum]
Version: 1
Protein MW: 54497.4 Protein pI: 6.1 Protein Length: 492 Index: 48077
Num Unique	% Cov	Best Disc Score	Best Expect Val
6	19.1	4.17	1.5e-06
m/z	z	Da	DB Peptide	Variable Mods	Fraction	RT	Start	End	Score	Expect	# in DB
511.285	2	0.016	(K)DTDILAAFR(V)		120523_07_SE_6_3	47.1752	33	41	35.9	0.00087	5
733.395	2	0.014	(K)TFQGPPHGIQVER(D)		120523_07_SE_6_3	19.0497	147	159	18.9	0.23	4
729.317	3	-0.015	(R)GGLDFTKDDENVNSQPFMR(W)	Oxidation@18	120523_07_SE_6_3	30.9292	195	213	34	0.0054	4
933.847	3	-0.23	(K)AQDETGEIKGHYLNATAGTCEEMMK(R)	Oxidation@23|24	120523_07_SE_6_3	81.6638	228	252	17.2	1.4	2
976.117	2	0.087	(R)DITLGFVDLLRDDFIAK(D)		120523_07_SE_6_3	81.6046	340	356	47.1	1.5e-06	5
571.781	2	-0.031	(R)DLAAEGNAIIR(E)		120523_07_SE_6_3	28.3233	436	446	39.6	0.032	4
1-2 Acc. #: 48162 Species: UNREADABLE Name: gi|340549415|gb|AEK53237.1| ribulose-1,5-bisphosphate carboxylase/oxygenase large subunit (chloroplast) [Dorcoceras hygrometricum]
Version: 1
Protein MW: 54497.4 Protein pI: 6.1 Protein Length: 492 Index: 48162
Num Unique	% Cov	Best Disc Score	Best Expect Val
6	19.1	4.17	1.5e-06
m/z	z	Da	DB Peptide	Variable Mods	Fraction	RT	Start	End	Score	Expect	# in DB
511.285	2	0.016	(K)DTDILAAFR(V)		120523_07_SE_6_3	47.1752	33	41	35.9	0.00087	5
733.395	2	0.014	(K)TFQGPPHGIQVER(D)		120523_07_SE_6_3	19.0497	147	159	18.9	0.23	4
729.317	3	-0.015	(R)GGLDFTKDDENVNSQPFMR(W)	Oxidation@18	120523_07_SE_6_3	30.9292	195	213	34	0.0054	4
933.847	3	-0.23	(K)AQDETGEIKGHYLNATAGTCEEMMK(R)	Oxidation@23|24	120523_07_SE_6_3	81.6638	228	252	17.2	1.4	2
976.117	2	0.087	(R)DITLGFVDLLRDDFIAK(D)		120523_07_SE_6_3	81.6046	340	356	47.1	1.5e-06	5
571.781	2	-0.031	(R)DLAAEGNAIIR(E)		120523_07_SE_6_3	28.3233	436	446	39.6	0.032	4
2 Acc. #: 13981 Species: UNREADABLE Name: gi|1024040408|gb|KZV45086.1| nucleoside diphosphate kinase 1-like [Dorcoceras hygrometricum]
Version: 1
Protein MW: 16342.8 Protein pI: 6.8 Protein Length: 148 Index: 13981
Num Unique	% Cov	Best Disc Score	Best Expect Val
6	39.2	3.19	2.2e-05
m/z	z	Da	DB Peptide	Variable Mods	Fraction	RT	Start	End	Score	Expect	# in DB
934.056	2	0.098	(-)MEQTFIMIKPDGVQR(G)	Acetyl+Oxidation@1;Oxidation@7	120523_07_SE_6_3	34.4217	1	15	24.6	0.0017	1
925.956	2	-0.0044	(-)MEQTFIMIKPDGVQR(G)	Acetyl@N-term=19;Oxidation@7=18	120523_07_SE_6_3	44.723	1	15	19	0.71	1
457.254	2	-0.023	(R)GLVGEIIGR(F)		120523_07_SE_6_3	35.9938	16	24	34.2	0.048	1
784.438	2	0.012	(K)IIGATNPAESAPGTIR(G)		120523_07_SE_6_3	21.4595	87	102	41.8	2.2e-05	1
490.253	2	0.0072	(R)GDYAIDIGR(N)		120523_07_SE_6_3	22.3974	103	111	27.8	0.0063	1
561.23	2	-0.037	(R)SSLHSWIYE(-)		120523_07_SE_6_3	34.1093	140	148	15.1	1.8	1
3 Acc. #: 138 Species: UNREADABLE Name: gi|1092181971|gb|AOY41489.1| ATP synthase CF1 epsilon subunit (chloroplast) [Haberlea rhodopensis]
Version: 1
Protein MW: 14819.3 Protein pI: 6.7 Protein Length: 133 Index: 138
Num Unique	% Cov	Best Disc Score	Best Expect Val
5	54.9	2.38	0.00021
m/z	z	Da	DB Peptide	Variable Mods	Fraction	RT	Start	End	Score	Expect	# in DB
1029.07	4	0.0067	(R)IVWDSEVKEIILCTTSGQIGILPNHAPIATAVDIGILR(I)		120523_07_SE_6_3	83.4647	13	50	37.4	0.02	2
1052.85	3	-0.067	(K)EIILCTTSGQIGILPNHAPIATAVDIGILR(I)		120523_07_SE_6_3	70.1982	21	50	18.1	0.1	2
814.579	2	0.14	(R)IGNNQITVLVNDAEK(G)		120523_07_SE_6_3	38.6613	69	83	27.7	0.0011	4
890.162	3	0.043	(R)IGNNQITVLVNDAEKGSDINPEEAK(Q)		120523_07_SE_6_3	47.7439	69	93	37.1	0.00021	2
568.235	2	-0.058	(R)TRVEAVNMIS(-)	Oxidation@8	120523_07_SE_6_3	12.8012	124	133	20.3	0.42	2
4 Acc. #: 24078 Species: UNREADABLE Name: gi|1024014117|gb|KZV34989.1| thylakoid lumenal 15 kDa protein 1, chloroplastic-like [Dorcoceras hygrometricum]
Version: 1
Protein MW: 21032.1 Protein pI: 8.7 Protein Length: 195 Index: 24078
Num Unique	% Cov	Best Disc Score	Best Expect Val
2	18.5	3.16	3.7e-05
m/z	z	Da	DB Peptide	Variable Mods	Fraction	RT	Start	End	Score	Expect	# in DB
1150.06	2	-0.0015	(K)LLGASFFDADLTGADLSDSDLR(G)		120523_07_SE_6_3	66.0175	99	120	42.4	3.7e-05	1
714.836	2	-0.021	(K)VADGVNPVTGNETR(E)		120523_07_SE_6_3	12.6639	176	189	31.4	0.0016	1
5 Acc. #: 37334 Species: UNREADABLE Name: gi|1023982083|gb|KZV21733.1| Galactose mutarotase-like superfamily protein isoform 1 [Dorcoceras hygrometricum]
Version: 1
Protein MW: 36677.8 Protein pI: 6.4 Protein Length: 335 Index: 37334
Num Unique	% Cov	Best Disc Score	Best Expect Val
1	4.8	3.55	1.7e-05
m/z	z	Da	DB Peptide	Variable Mods	Fraction	RT	Start	End	Score	Expect	# in DB
896.955	2	-0.035	(K)LADVVLGFDTLEPYLK(G)		120523_07_SE_6_3	69.0717	37	52	44.9	1.7e-05	1
6 Acc. #: 11451 Species: UNREADABLE Name: gi|1024044731|gb|KZV47616.1| hypothetical protein F511_12885 [Dorcoceras hygrometricum]
Version: 1
Protein MW: 15209.2 Protein pI: 6.4 Protein Length: 135 Index: 11451
Num Unique	% Cov	Best Disc Score	Best Expect Val
1	11.1	3.39	2.5e-05
m/z	z	Da	DB Peptide	Variable Mods	Fraction	RT	Start	End	Score	Expect	# in DB
764.922	2	0.044	(R)AVENGAVAVSEPEEK(E)		120523_07_SE_6_3	13.0842	96	110	44	2.5e-05	2
7 Acc. #: 34215 Species: UNREADABLE Name: gi|1023989432|gb|KZV24852.1| glyceraldehyde-3-phosphate dehydrogenase, cytosolic-like [Dorcoceras hygrometricum]
Version: 1
Protein MW: 32993.0 Protein pI: 6.7 Protein Length: 300 Index: 34215
Num Unique	% Cov	Best Disc Score	Best Expect Val
2	7.3	2.58	2.8e-05
m/z	z	Da	DB Peptide	Variable Mods	Fraction	RT	Start	End	Score	Expect	# in DB
417.245	2	0.0095	(K)IGINGFGR(I)		120523_07_SE_6_3	18.2247	18	25	17.1	1.3	3
749.904	2	-0.024	(R)VPTVDVSVVDLTVR(L)		120523_07_SE_6_3	49.0138	200	213	36.1	2.8e-05	2
8 Acc. #: 30683 Species: UNREADABLE Name: gi|1023997883|gb|KZV28384.1| Early light-induced protein [Dorcoceras hygrometricum]
Version: 1
Protein MW: 20554.8 Protein pI: 7.9 Protein Length: 192 Index: 30683
Num Unique	% Cov	Best Disc Score	Best Expect Val
1	7.3	3.17	9.9e-05
m/z	z	Da	DB Peptide	Variable Mods	Fraction	RT	Start	End	Score	Expect	# in DB
740.886	2	0.045	(K)ATDIMAFDGPAAER(I)	Oxidation@5	120523_07_SE_6_3	22.7227	81	94	44.1	9.9e-05	3
9 Acc. #: 168 Species: UNREADABLE Name: gi|1092181941|gb|AOY41459.1| ATP synthase CF1 alpha subunit (chloroplast) [Haberlea rhodopensis]
Version: 1
Protein MW: 55354.6 Protein pI: 5.2 Protein Length: 507 Index: 168
Num Unique	% Cov	Best Disc Score	Best Expect Val
1	4.9	1.97	0.00044
m/z	z	Da	DB Peptide	Variable Mods	Fraction	RT	Start	End	Score	Expect	# in DB
952.181	3	0.031	(K)TNKPQFQEIISSTETFTEEAEALLK(E)		120523_07_SE_6_3	83.8922	467	491	34.5	0.00044	2
10 Acc. #: 161 Species: UNREADABLE Name: gi|1092181948|gb|AOY41466.1| photosystem II protein D2 (chloroplast) [Haberlea rhodopensis]
Version: 1
Protein MW: 39593.9 Protein pI: 5.3 Protein Length: 353 Index: 161
Num Unique	% Cov	Best Disc Score	Best Expect Val
1	3.7	1.95	0.00087
m/z	z	Da	DB Peptide	Variable Mods	Fraction	RT	Start	End	Score	Expect	# in DB
774.321	2	-0.028	(R)AAEDPEFETFYTK(N)		120523_07_SE_6_3	34.3776	306	318	35.5	0.00087	4
11 Acc. #: 19451 Species: UNREADABLE Name: gi|1024025959|gb|KZV39616.1| hypothetical protein F511_02079 [Dorcoceras hygrometricum]
Version: 1
Protein MW: 31246.8 Protein pI: 5.6 Protein Length: 286 Index: 19451
Num Unique	% Cov	Best Disc Score	Best Expect Val
2	19.2	1.76	0.00031
m/z	z	Da	DB Peptide	Variable Mods	Fraction	RT	Start	End	Score	Expect	# in DB
1098.72	4	-0.063	(K)APDYLDGTLIGDYGFDPFGLGKPAEYLQFDLDSLDQNLAK(N)		120523_07_SE_6_3	93.0656	59	98	19	4.5	1
878.403	2	-0.035	(K)STPFQPYSEVFGLQR(F)		120523_07_SE_6_3	51.5163	116	130	31.9	0.00031	2
12 Acc. #: 26020 Species: UNREADABLE Name: gi|1024009428|gb|KZV33047.1| oxysterol-binding protein-related protein 1C-like [Dorcoceras hygrometricum]
Version: 1
Protein MW: 89899.0 Protein pI: 6.6 Protein Length: 787 Index: 26020
Num Unique	% Cov	Best Disc Score	Best Expect Val
3	3.7	1.06	0.0081
m/z	z	Da	DB Peptide	Variable Mods	Fraction	RT	Start	End	Score	Expect	# in DB
758.408	2	0.55	(R)FAITMNEIMPGMK(E)	Oxidation@5=21;Oxidation@12=18	120523_07_SE_6_3	40.369	681	693	17.7	2.3	1
976.974	2	0.54	(R)CLEHGEYDMANAEKLR(L)	Oxidation@9	120523_07_SE_6_3	19.1064	709	724	23.1	0.078	1
968.928	2	0.49	(R)CLEHGEYDMANAEKLR(L)		120523_07_SE_6_3	28.2352	709	724	30.2	0.0081	1
13 Acc. #: 36311 Species: UNREADABLE Name: gi|1023984499|gb|KZV22756.1| hypothetical protein F511_05388 [Dorcoceras hygrometricum]
Version: 1
Protein MW: 27424.7 Protein pI: 7.9 Protein Length: 259 Index: 36311
Num Unique	% Cov	Best Disc Score	Best Expect Val
1	13.1	1.66	0.00047
m/z	z	Da	DB Peptide	Variable Mods	Fraction	RT	Start	End	Score	Expect	# in DB
1175.69	3	0.12	(R)GGGNFVDPEWLDGSLAGDYGFDPLGLGKDPAFLK(W)		120523_07_SE_6_3	79.195	64	97	31.6	0.00047	1
14 Acc. #: 44142 Species: UNREADABLE Name: gi|1023966559|gb|KZV14925.1| ribulose bisphosphate carboxylase small chain, chloroplastic-like [Dorcoceras hygrometricum]
Version: 1
Protein MW: 20304.7 Protein pI: 9.3 Protein Length: 180 Index: 44142
Num Unique	% Cov	Best Disc Score	Best Expect Val
4	20.6	0.67	0.0023
m/z	z	Da	DB Peptide	Variable Mods	Fraction	RT	Start	End	Score	Expect	# in DB
1075.17	2	0.081	(R)KFETLSYLPPLTEEQLLK(Q)		120523_07_SE_6_3	57.3885	67	84	24.3	0.0062	1
1011.1	2	0.054	(K)FETLSYLPPLTEEQLLK(Q)		120523_07_SE_6_3	63.9665	68	84	23.2	0.024	1
695.409	2	0.015	(R)LKLIPCLEFEK(R)		120523_07_SE_6_3	48.158	92	102	20.5	0.087	1
457.748	2	0.044	(R)SPGYYDGR(Y)		120523_07_SE_6_3	9.7269	114	121	23.7	0.0023	1
15 Acc. #: 2379 Species: UNREADABLE Name: gi|1024061194|gb|KZV56688.1| cytochrome c oxidase subunit 6b-like [Dorcoceras hygrometricum]
Version: 1
Protein MW: 9063.1 Protein pI: 9.2 Protein Length: 80 Index: 2379
Num Unique	% Cov	Best Disc Score	Best Expect Val
1	32.5	1.46	0.033
m/z	z	Da	DB Peptide	Variable Mods	Fraction	RT	Start	End	Score	Expect	# in DB
684.138	4	0.03	(R)GEQAPRPPQQSPPVSRPPPPSSTNPK(V)		120523_07_SE_6_3	12.5357	24	49	36.6	0.033	1
16 Acc. #: 24314 Species: UNREADABLE Name: gi|1024013872|gb|KZV34753.1| hypothetical protein F511_00655 [Dorcoceras hygrometricum]
Version: 1
Protein MW: 51929.2 Protein pI: 6.4 Protein Length: 477 Index: 24314
Num Unique	% Cov	Best Disc Score	Best Expect Val
2	5.9	1.36	0.00074
m/z	z	Da	DB Peptide	Variable Mods	Fraction	RT	Start	End	Score	Expect	# in DB
718.315	2	-0.024	(K)KYDEIDAAPEER(A)		120523_07_SE_6_3	12.4919	114	125	17.5	2.2	1
899.395	2	-0.051	(R)GITINTATVEYETETR(H)		120523_07_SE_6_3	34.5223	128	143	29.3	0.00074	1
17 Acc. #: 19778 Species: UNREADABLE Name: gi|1024024856|gb|KZV39289.1| actin-7-like [Dorcoceras hygrometricum]
Version: 1
Protein MW: 67529.1 Protein pI: 5.4 Protein Length: 601 Index: 19778
Num Unique	% Cov	Best Disc Score	Best Expect Val
1	2.7	1.24	0.0025
m/z	z	Da	DB Peptide	Variable Mods	Fraction	RT	Start	End	Score	Expect	# in DB
650.313	3	0.016	(K)YPIEHGIVSNWDDMEK(I)	Oxidation@14	120523_07_SE_6_3	31.6967	71	86	30.1	0.0025	4
18 Acc. #: 12543 Species: UNREADABLE Name: gi|1024043224|gb|KZV46524.1| T-complex protein 1 subunit delta [Dorcoceras hygrometricum]
Version: 1
Protein MW: 57166.1 Protein pI: 6.6 Protein Length: 531 Index: 12543
Num Unique	% Cov	Best Disc Score	Best Expect Val
1	2.8	0.87	0.042
m/z	z	Da	DB Peptide	Variable Mods	Fraction	RT	Start	End	Score	Expect	# in DB
765.388	2	-0.031	(K)FLIAGGGAPEIELSR(Q)		120523_07_SE_6_3	46.5797	412	426	31.1	0.042	1
19 Acc. #: 23343 Species: UNREADABLE Name: gi|1024015964|gb|KZV35724.1| triosephosphate isomerase, cytosolic-like, partial [Dorcoceras hygrometricum]
Version: 1
Protein MW: 25844.8 Protein pI: 5.5 Protein Length: 241 Index: 23343
Num Unique	% Cov	Best Disc Score	Best Expect Val
1	5.8	0.51	0.013
m/z	z	Da	DB Peptide	Variable Mods	Fraction	RT	Start	End	Score	Expect	# in DB
719.336	2	-0.012	(R)EAGSTMEVVAAQTK(A)	Oxidation@6	120523_07_SE_6_3	12.2501	123	136	25.6	0.013	2
20 Acc. #: 35237 Species: UNREADABLE Name: gi|1023986589|gb|KZV23830.1| hypothetical protein F511_31177 [Dorcoceras hygrometricum]
Version: 1
Protein MW: 27153.0 Protein pI: 10.5 Protein Length: 246 Index: 35237
Num Unique	% Cov	Best Disc Score	Best Expect Val
1	11	0.41	0.22
m/z	z	Da	DB Peptide	Variable Mods	Fraction	RT	Start	End	Score	Expect	# in DB
763.088	4	-0.071	(-)MAKPVHVVPRPNVWSSLSTPNGYKNVR(L)	Oxidation@1	120523_07_SE_6_3	11.9667	1	27	29.2	0.22	1
21 Acc. #: 11428 Species: UNREADABLE Name: gi|1024044758|gb|KZV47639.1| hypothetical protein F511_14425 [Dorcoceras hygrometricum]
Version: 1
Protein MW: 28364.0 Protein pI: 9.5 Protein Length: 260 Index: 11428
Num Unique	% Cov	Best Disc Score	Best Expect Val
1	12.3	0.36	0.0072
m/z	z	Da	DB Peptide	Variable Mods	Fraction	RT	Start	End	Score	Expect	# in DB
997.028	3	-0.45	(R)RVPEMGGEAAGLMASGGGSVGGPVQQSTSGSR(R)	Oxidation@13=11	120523_07_SE_6_3	77.9183	154	185	23.1	0.0072	1
22 Acc. #: 29422 Species: UNREADABLE Name: gi|1024000762|gb|KZV29645.1| Kinase protein with adenine nucleotide alpha hydrolases-like domain isoform 1 [Dorcoceras hygrometricum]
Version: 1
Protein MW: 54520.9 Protein pI: 5.5 Protein Length: 488 Index: 29422
Num Unique	% Cov	Best Disc Score	Best Expect Val
1	5.7	0.36	0.3
m/z	z	Da	DB Peptide	Variable Mods	Fraction	RT	Start	End	Score	Expect	# in DB
808.314	4	0.15	(K)LVDPRLNGCYLETAVQGMIHVASLCIQR(D)	Oxidation@18	120523_07_SE_6_3	26.7299	439	466	29.2	0.3	1
23 Acc. #: 43890 Species: UNREADABLE Name: gi|1023966857|gb|KZV15177.1| auto-inhibited Ca2 -transporting ATPase 10 [Dorcoceras hygrometricum]
Version: 1
Protein MW: 117762.2 Protein pI: 7.8 Protein Length: 1073 Index: 43890
Num Unique	% Cov	Best Disc Score	Best Expect Val
1	3.3	0.32	0.027
m/z	z	Da	DB Peptide	Variable Mods	Fraction	RT	Start	End	Score	Expect	# in DB
858.836	4	0.41	(K)GHVVAVTGDGTNDAPALHEADIGLAMGIQGTEVAK(E)	Oxidation@26	120523_07_SE_6_3	73.339	788	822	24.8	0.027	1
24 Acc. #: 167 Species: UNREADABLE Name: gi|1092181942|gb|AOY41460.1| ATP synthase CF1 beta subunit (chloroplast) [Haberlea rhodopensis]
Version: 1
Protein MW: 53852.3 Protein pI: 5.1 Protein Length: 498 Index: 167
Num Unique	% Cov	Best Disc Score	Best Expect Val
1	3.6	0.27	0.049
m/z	z	Da	DB Peptide	Variable Mods	Fraction	RT	Start	End	Score	Expect	# in DB
977.959	2	-0.056	(R)IFNVLGEPVDNLGPVDTR(T)		120523_07_SE_6_3	53.8025	110	127	25.3	0.049	4
25 Acc. #: 31405 Species: UNREADABLE Name: gi|1023996510|gb|KZV27662.1| hypothetical protein F511_42820 [Dorcoceras hygrometricum]
Version: 1
Protein MW: 15837.3 Protein pI: 11.4 Protein Length: 144 Index: 31405
Num Unique	% Cov	Best Disc Score	Best Expect Val
1	10.4	0.25	0.022
m/z	z	Da	DB Peptide	Variable Mods	Fraction	RT	Start	End	Score	Expect	# in DB
747.833	2	0.023	(-)MGGGTPPDAMAACAR(A)	Oxidation@1;Oxidation@10	120523_07_SE_6_3	27.7363	1	15	23.8	0.022	1
26 Acc. #: 8743 Species: UNREADABLE Name: gi|1024050215|gb|KZV50324.1| Chlorophyll a-b binding protein 2 [Dorcoceras hygrometricum]
Version: 1
Protein MW: 27916.9 Protein pI: 5.1 Protein Length: 264 Index: 8743
Num Unique	% Cov	Best Disc Score	Best Expect Val
2	16.3	0.13	0.15
m/z	z	Da	DB Peptide	Variable Mods	Fraction	RT	Start	End	Score	Expect	# in DB
492.277	2	0.024	(K)FGEAVWFK(A)		120523_07_SE_6_3	40.8074	124	131	25.7	0.15	1
1172.13	3	-0.12	(R)VAGGPLGEVTDPIYPGGSFDPLGLADDPEAFAELK(V)		120523_07_SE_6_3	80.8532	175	209	17.6	0.16	1
27 Acc. #: 31783 Species: UNREADABLE Name: gi|1023995708|gb|KZV27284.1| auxin response factor 1-like [Dorcoceras hygrometricum]
Version: 1
Protein MW: 56887.0 Protein pI: 9.0 Protein Length: 511 Index: 31783
Num Unique	% Cov	Best Disc Score	Best Expect Val
1	6.5	0.21	0.27
m/z	z	Da	DB Peptide	Variable Mods	Fraction	RT	Start	End	Score	Expect	# in DB
887.907	4	0.22	(R)LMRQMNNMTSSVISGHSMNLGVLATASHAISTR(T)	Oxidation@18=25;Oxidation@2|5|8	120523_07_SE_6_3	83.9365	75	107	27.5	0.27	1
28 Acc. #: 36977 Species: UNREADABLE Name: gi|1023983178|gb|KZV22090.1| nuclear matrix constituent protein 1-like protein-like [Dorcoceras hygrometricum]
Version: 1
Protein MW: 93282.9 Protein pI: 5.7 Protein Length: 846 Index: 36977
Num Unique	% Cov	Best Disc Score	Best Expect Val
1	4.8	0.03	0.4
m/z	z	Da	DB Peptide	Variable Mods	Fraction	RT	Start	End	Score	Expect	# in DB
1130.79	4	-0.012	(K)NLVQAVGSKQVGEEHMSIDDLLMQISEDMMLPSVTTAEITK(I)	Oxidation&Oxidation@((16&(23|29|30))|(23&(29|30))|(29&30))	120523_07_SE_6_3	98.7678	412	452	26.4	0.4	1
29 Acc. #: 25100 Species: UNREADABLE Name: gi|1024011794|gb|KZV33967.1| hypothetical protein F511_04192 [Dorcoceras hygrometricum]
Version: 1
Protein MW: 21773.4 Protein pI: 9.3 Protein Length: 193 Index: 25100
Num Unique	% Cov	Best Disc Score	Best Expect Val
1	15.5	0.02	0.41
m/z	z	Da	DB Peptide	Variable Mods	Fraction	RT	Start	End	Score	Expect	# in DB
831.923	4	0.29	(R)SGKQSLTATSTMEAEFVSCFEATSHGVWMK(S)	Oxidation@12=22	120523_07_SE_6_3	62.7702	86	115	26.3	0.41	1
30 Acc. #: 38466 Species: UNREADABLE Name: gi|1023979584|gb|KZV20601.1| cytochrome b561 and DOMON domain-containing protein [Dorcoceras hygrometricum]
Version: 1
Protein MW: 43483.2 Protein pI: 9.8 Protein Length: 398 Index: 38466
Num Unique	% Cov	Best Disc Score	Best Expect Val
1	9.3	0.01	0.27
m/z	z	Da	DB Peptide	Variable Mods	Fraction	RT	Start	End	Score	Expect	# in DB
959.075	4	0.35	(R)LLSHPQTQEHQSSFGSIDFSTGVTSGTGASIAGSRQR(R)		120523_07_SE_6_3	71.5307	172	208	25.6	0.27	1
Band 1 Control
ID: 3 (120523_08_SE_1a_3_ctrl)
Number of Proteins (After Homology Filtering): 59
Number of Peptides: 210
Search 1 Number of Data Spectra: 1363
Search 1 Proteins (Pre Homology Filtering): 99
Database: User Protein (48439/48439 entries searched)
[+] Original Search Parameters 1
Average Parent Error: 0.02
3 * StdDev: 0.36
1 Acc. #: 164 Species: UNREADABLE Name: gi|1092181945|gb|AOY41463.1| ribulose 1,5-bisphosphate carboxylase/oxygenase large subunit (chloroplast) [Haberlea rhodopensis]
Version: 1
Protein MW: 53515.3 Protein pI: 6.1 Protein Length: 483 Index: 164
Num Unique	% Cov	Best Disc Score	Best Expect Val
24	61.5	4.31	2.5e-06
m/z	z	Da	DB Peptide	Variable Mods	Fraction	RT	Start	End	Score	Expect	# in DB
704.354	2	0.016	(K)LTYYTPEYETK(D)		120523_08_SE_1a_3_ctrl	23.4984	22	32	29.1	0.0048	2
511.244	2	-0.025	(K)DTDILAAFR(V)		120523_08_SE_1a_3_ctrl	47.4609	33	41	35.9	0.00045	5
1285.68	3	0.048	(R)VTPQPGVPPEEAGAAVAAESSTGTWTTVWTDGLTSLDR(Y)		120523_08_SE_1a_3_ctrl	73.2969	42	79	26.1	0.0073	4
1306.31	4	-0.046	(R)CYHIEPVPGETDQYICYVAYPLDLFEEGSVTNMFTSIVGNVFGFK(A)	Oxidation@33	120523_08_SE_1a_3_ctrl	103.106	84	128	30.2	0.0044	4
733.695	2	0.31	(K)TFQGPPHGIQVER(D)		120523_08_SE_1a_3_ctrl	19.7964	147	159	37.6	8e-05	4
518.628	4	-0.18	(K)YGRPLLGCTIKPKLGLSAK(N)		120523_08_SE_1a_3_ctrl	35.5728	165	183	19.1	18	4
455.709	2	-0.018	(R)AVYECLR(G)		120523_08_SE_1a_3_ctrl	14.2178	188	194	17.8	0.25	4
1093.55	2	0.058	(R)GGLDFTKDDENVNSQPFMR(W)	Oxidation@18	120523_08_SE_1a_3_ctrl	31.3463	195	213	16.7	0.48	4
1085.58	2	0.08	(R)GGLDFTKDDENVNSQPFMR(W)		120523_08_SE_1a_3_ctrl	37.6267	195	213	33	9.4e-05	4
734.425	2	0.11	(K)DDENVNSQPFMR(W)	Oxidation@11	120523_08_SE_1a_3_ctrl	13.992	202	213	30.4	0.0023	4
726.297	2	-0.018	(K)DDENVNSQPFMR(W)		120523_08_SE_1a_3_ctrl	20.866	202	213	28.8	0.01	4
631.338	2	0.021	(R)FLFCAEAIYK(A)		120523_08_SE_1a_3_ctrl	48.244	218	227	30.6	0.00097	4
924.739	3	-0.0084	(K)AQAETGEIKGHYLNATAGTCEEMMK(R)	Oxidation@23;Oxidation@24	120523_08_SE_1a_3_ctrl	16.7646	228	252	15.4	0.75	2
615.581	3	-0.011	(K)GHYLNATAGTCEEMMK(R)	Oxidation@14;Oxidation@15	120523_08_SE_1a_3_ctrl	11.7909	237	252	29	0.0067	4
662.328	3	0.034	(K)GHYLNATAGTCEEMMKR(A)	Oxidation@14|15	120523_08_SE_1a_3_ctrl	14.0343	237	253	20.7	0.18	4
763.953	4	0.082	(R)ELGVPIIMHDYLTGGFTANTSLAHYCR(D)	Oxidation@8	120523_08_SE_1a_3_ctrl	54.5654	259	285	22.9	0.044	2
759.896	4	0.023	(R)ELGVPIIMHDYLTGGFTANTSLAHYCR(D)		120523_08_SE_1a_3_ctrl	64.1054	259	285	32.6	0.0017	2
594.381	2	0.045	(R)DNGLLLHIHR(A)		120523_08_SE_1a_3_ctrl	24.9221	286	295	35.6	0.0047	5
615.96	3	-0.047	(K)LEGERDITLGFVDLLR(D)		120523_08_SE_1a_3_ctrl	65.6619	335	350	25.1	0.084	5
976.038	2	0.0075	(R)DITLGFVDLLRDDFIAK(D)		120523_08_SE_1a_3_ctrl	81.8353	340	356	49.4	2.5e-06	5
558.784	2	-0.012	(R)VALEACVQAR(N)		120523_08_SE_1a_3_ctrl	17.7037	422	431	37	0.0025	2
571.785	2	-0.027	(R)DLAAEGNAIIR(E)		120523_08_SE_1a_3_ctrl	28.5113	436	446	39.9	0.036	4
773.893	2	0.022	(K)WSPELAAACEVWK(E)		120523_08_SE_1a_3_ctrl	48.6324	451	463	36.3	8.9e-05	5
470.799	2	0.038	(K)EIKFEFK(A)		120523_08_SE_1a_3_ctrl	27.1949	464	470	18.9	1.8	6
2 Acc. #: 17213 Species: UNREADABLE Name: gi|1024030973|gb|KZV41854.1| glyceraldehyde-3-phosphate dehydrogenase B, chloroplastic [Dorcoceras hygrometricum]
Version: 1
Protein MW: 48458.7 Protein pI: 5.9 Protein Length: 453 Index: 17213
Num Unique	% Cov	Best Disc Score	Best Expect Val
10	23.2	3.69	6.7e-06
m/z	z	Da	DB Peptide	Variable Mods	Fraction	RT	Start	End	Score	Expect	# in DB
821.431	2	-0.0071	(K)DSPLDVIVINDSAGVK(N)		120523_08_SE_1a_3_ctrl	46.0204	110	125	18.6	0.16	1
539.254	2	0.0045	(K)YDSMLGTFK(A)	Oxidation@4	120523_08_SE_1a_3_ctrl	20.0825	133	141	27.1	0.00044	2
591.822	2	0.033	(K)VMDEEFGIVK(G)	Oxidation@2	120523_08_SE_1a_3_ctrl	25.5793	251	260	29.3	0.024	1
692.882	2	-0.012	(R)AAALNIVPTSTGAAK(A)		120523_08_SE_1a_3_ctrl	26.3127	288	302	21.1	0.058	2
534.312	2	-0.033	(K)AVSLVLPQLK(G)		120523_08_SE_1a_3_ctrl	45.7923	303	312	28.7	0.017	2
904.528	2	0.016	(R)VPTPNVSVVDLVVNVEK(K)		120523_08_SE_1a_3_ctrl	59.3991	322	338	44.7	6.7e-06	2
646.039	3	-0.0033	(R)VPTPNVSVVDLVVNVEKK(G)		120523_08_SE_1a_3_ctrl	55.7199	322	339	32.5	0.00039	2
632.348	2	0.028	(K)GLTAEDVNAAFR(K)		120523_08_SE_1a_3_ctrl	31.9957	340	351	44.8	2.4e-05	2
696.378	2	0.01	(K)GLTAEDVNAAFRK(A)		120523_08_SE_1a_3_ctrl	26.8226	340	352	23.8	0.04	2
886.898	2	-0.0074	(K)VVAWYDNEWGYSQR(V)		120523_08_SE_1a_3_ctrl	42.9713	398	411	41.3	2.6e-05	2
2-1 Acc. #: 18225 Species: UNREADABLE Name: gi|1024029385|gb|KZV40842.1| glyceraldehyde-3-phosphate dehydrogenase B, chloroplastic-like [Dorcoceras hygrometricum]
Version: 1
Protein MW: 48106.2 Protein pI: 6.5 Protein Length: 450 Index: 18225
Num Unique	% Cov	Best Disc Score	Best Expect Val
9	20	3.69	6.7e-06
m/z	z	Da	DB Peptide	Variable Mods	Fraction	RT	Start	End	Score	Expect	# in DB
539.254	2	0.0045	(K)YDSMLGTFK(A)	Oxidation@4	120523_08_SE_1a_3_ctrl	20.0825	130	138	27.1	0.00044	2
692.882	2	-0.012	(R)AAALNIVPTSTGAAK(A)		120523_08_SE_1a_3_ctrl	26.3127	285	299	21.1	0.058	2
534.312	2	-0.033	(K)AVSLVLPQLK(G)		120523_08_SE_1a_3_ctrl	45.7923	300	309	28.7	0.017	2
904.528	2	0.016	(R)VPTPNVSVVDLVVNVEK(K)		120523_08_SE_1a_3_ctrl	59.3991	319	335	44.7	6.7e-06	2
646.039	3	-0.0033	(R)VPTPNVSVVDLVVNVEKK(G)		120523_08_SE_1a_3_ctrl	55.7199	319	336	32.5	0.00039	2
632.348	2	0.028	(K)GLTAEDVNAAFR(K)		120523_08_SE_1a_3_ctrl	31.9957	337	348	44.8	2.4e-05	2
696.378	2	0.01	(K)GLTAEDVNAAFRK(A)		120523_08_SE_1a_3_ctrl	26.8226	337	349	23.8	0.04	2
886.898	2	-0.0074	(K)VVAWYDNEWGYSQR(V)		120523_08_SE_1a_3_ctrl	42.9713	395	408	41.3	2.6e-05	2
589.875	2	0.026	(R)VVDLAHLVANK(W)		120523_08_SE_1a_3_ctrl	33.919	409	419	40.1	5.9e-05	1
3 Acc. #: 168 Species: UNREADABLE Name: gi|1092181941|gb|AOY41459.1| ATP synthase CF1 alpha subunit (chloroplast) [Haberlea rhodopensis]
Version: 1
Protein MW: 55354.6 Protein pI: 5.2 Protein Length: 507 Index: 168
Num Unique	% Cov	Best Disc Score	Best Expect Val
13	36.3	2.8	5.2e-05
m/z	z	Da	DB Peptide	Variable Mods	Fraction	RT	Start	End	Score	Expect	# in DB
806.926	2	-0.029	(K)IVNTGTVLQVGDGIAR(I)		120523_08_SE_1a_3_ctrl	38.4245	26	41	36.6	8.5e-05	4
708.923	2	0.027	(R)IAQIPVSEAYLGR(V)		120523_08_SE_1a_3_ctrl	36.4912	95	107	38.2	5.2e-05	5
723.079	3	0.014	(R)VINALAKPIDGRGEIAASESR(L)		120523_08_SE_1a_3_ctrl	25.6211	108	128	25.1	0.042	5
626.855	2	-0.012	(R)LIESPAPGIISR(R)		120523_08_SE_1a_3_ctrl	29.261	129	140	35.4	8.4e-05	5
815.762	3	-0.015	(R)RSVYEPLQTGLIAIDSMIPIGR(G)	Oxidation@17	120523_08_SE_1a_3_ctrl	62.5593	141	162	31.9	0.00093	5
1145.11	2	-0.00069	(R)SVYEPLQTGLIAIDSMIPIGR(G)	Oxidation@16	120523_08_SE_1a_3_ctrl	68.0483	142	162	39.3	0.00016	5
751.415	2	0.013	(K)ASSVAQVVNTLQER(G)		120523_08_SE_1a_3_ctrl	36.5666	203	216	34.9	0.0056	5
659.414	2	0.058	(K)HTLIIYDDLSK(Q)		120523_08_SE_1a_3_ctrl	33.1493	256	266	37.1	0.0015	5
438.759	2	0.0068	(R)QMSLLLR(R)	Oxidation@2	120523_08_SE_1a_3_ctrl	20.6617	273	279	17.1	2.7	13
777.358	2	-0.015	(R)EAYPGDVFYLHSR(L)		120523_08_SE_1a_3_ctrl	35.1281	285	297	38.2	0.0003	5
866.414	3	-0.041	(K)LKLELAQFAELEAFAQFASDLDK(A)		120523_08_SE_1a_3_ctrl	87.7764	383	405	19.3	0.068	5
452.849	2	0.064	(R)KFLVELR(T)		120523_08_SE_1a_3_ctrl	28.4224	456	462	21.6	1.3	5
952.112	3	-0.038	(K)TNKPQFQEIISSTETFTEEAEALLK(E)		120523_08_SE_1a_3_ctrl	84.1036	467	491	34	0.00058	2
3-1 Acc. #: 31496 Species: UNREADABLE Name: gi|1023996042|gb|KZV27571.1| hypothetical protein F511_10975 [Dorcoceras hygrometricum]
Version: 1
Protein MW: 121939.9 Protein pI: 7.9 Protein Length: 1115 Index: 31496
Num Unique	% Cov	Best Disc Score	Best Expect Val
12	14.8	2.8	5.2e-05
m/z	z	Da	DB Peptide	Variable Mods	Fraction	RT	Start	End	Score	Expect	# in DB
795.405	3	-0.33	(-)MRGLMSDPQGQMIDLPIQSNLR(E)	Met-loss@1;Oxidation@5=20	120523_08_SE_1a_3_ctrl	60.3282	1	22	16.1	1.2	1
708.923	2	0.027	(R)IAQIPVSEAYLGR(V)		120523_08_SE_1a_3_ctrl	36.4912	703	715	38.2	5.2e-05	5
723.079	3	0.014	(R)VINALAKPIDGRGEIAASESR(L)		120523_08_SE_1a_3_ctrl	25.6211	716	736	25.1	0.042	5
626.855	2	-0.012	(R)LIESPAPGIISR(R)		120523_08_SE_1a_3_ctrl	29.261	737	748	35.4	8.4e-05	5
815.762	3	-0.015	(R)RSVYEPLQTGLIAIDSMIPIGR(G)	Oxidation@17	120523_08_SE_1a_3_ctrl	62.5593	749	770	31.9	0.00093	5
1145.11	2	-0.00069	(R)SVYEPLQTGLIAIDSMIPIGR(G)	Oxidation@16	120523_08_SE_1a_3_ctrl	68.0483	750	770	39.3	0.00016	5
751.415	2	0.013	(K)ASSVAQVVNTLQER(G)		120523_08_SE_1a_3_ctrl	36.5666	811	824	34.9	0.0056	5
659.414	2	0.058	(K)HTLIIYDDLSK(Q)		120523_08_SE_1a_3_ctrl	33.1493	864	874	37.1	0.0015	5
438.759	2	0.0068	(R)QMSLLLR(R)	Oxidation@2	120523_08_SE_1a_3_ctrl	20.6617	881	887	17.1	2.7	13
777.358	2	-0.015	(R)EAYPGDVFYLHSR(L)		120523_08_SE_1a_3_ctrl	35.1281	893	905	38.2	0.0003	5
866.414	3	-0.041	(K)LKLELAQFAELEAFAQFASDLDK(A)		120523_08_SE_1a_3_ctrl	87.7764	991	1013	19.3	0.068	5
452.849	2	0.064	(R)KFLVELR(T)		120523_08_SE_1a_3_ctrl	28.4224	1064	1070	21.6	1.3	5
4 Acc. #: 32947 Species: UNREADABLE Name: gi|1023992205|gb|KZV26120.1| ribulose bisphosphate carboxylase/oxygenase activase, chloroplastic [Dorcoceras hygrometricum]
Version: 1
Protein MW: 53876.2 Protein pI: 7.5 Protein Length: 490 Index: 32947
Num Unique	% Cov	Best Disc Score	Best Expect Val
9	32	4.09	3.8e-06
m/z	z	Da	DB Peptide	Variable Mods	Fraction	RT	Start	End	Score	Expect	# in DB
906.307	4	-0.42	(-)MAAALSTAGAVNHLPLKLHGSGGGAAMPSSSFLGTSLK(K)	Oxidation@27=12	120523_08_SE_1a_3_ctrl	44.2626	1	38	15.9	12	1
547.3	2	0.011	(K)NFMTLPNIK(V)	Oxidation@3	120523_08_SE_1a_3_ctrl	29.5932	141	149	25.2	0.051	2
1168.59	2	0.056	(K)MGINPIMMSAGELESGNAGEPAK(L)	Oxidation@1=18;Oxidation@8=6	120523_08_SE_1a_3_ctrl	40.4213	198	220	43	6.6e-06	1
1045.1	2	0.013	(R)VPIIVTGNDFSTLYAPLIR(D)		120523_08_SE_1a_3_ctrl	68.4276	294	312	27.5	0.0056	1
663.898	2	0.083	(K)FYWAPTRDDR(I)		120523_08_SE_1a_3_ctrl	24.6312	319	328	17.1	3	1
1013.03	3	0.17	(R)TDNVSPEAVIKLVDTFPGQSIDFFGALR(A)		120523_08_SE_1a_3_ctrl	102.751	338	365	23.5	0.0085	1
941.983	2	-0.0059	(K)LVDTFPGQSIDFFGALR(A)		120523_08_SE_1a_3_ctrl	68.7085	349	365	47.9	3.8e-06	1
979.514	2	0.032	(K)LLEYGYMLVQEQDNVK(R)	Oxidation@7	120523_08_SE_1a_3_ctrl	41.6547	409	424	15.1	2.3	1
729.968	2	0.11	(K)DAALGDANKDAIER(G)		120523_08_SE_1a_3_ctrl	13.1256	435	448	35.6	0.0026	1
4-1 Acc. #: 4211 Species: UNREADABLE Name: gi|1024058127|gb|KZV54856.1| ribulose bisphosphate carboxylase/oxygenase activase, chloroplastic [Dorcoceras hygrometricum]
Version: 1
Protein MW: 46922.0 Protein pI: 6.4 Protein Length: 427 Index: 4211
Num Unique	% Cov	Best Disc Score	Best Expect Val
7	13.3	2.59	3.5e-05
m/z	z	Da	DB Peptide	Variable Mods	Fraction	RT	Start	End	Score	Expect	# in DB
547.3	2	0.011	(K)NFMTLPNIK(V)	Oxidation@3	120523_08_SE_1a_3_ctrl	29.5932	138	146	25.2	0.051	2
738.391	3	-0.031	(K)NFMTLPNIKVPLILGVWGGK(G)	Oxidation@3	120523_08_SE_1a_3_ctrl	73.8365	138	157	27.8	0.00071	1
733.04	3	-0.051	(K)NFMTLPNIKVPLILGVWGGK(G)		120523_08_SE_1a_3_ctrl	80.8378	138	157	30.5	0.0018	1
569.868	2	0.015	(K)VPLILGVWGGK(G)		120523_08_SE_1a_3_ctrl	56.5572	147	157	31.2	0.00072	2
1075.58	2	0.0065	(R)VPIICTGNDFSTLYAPLIR(D)		120523_08_SE_1a_3_ctrl	64.8062	268	286	36.6	3.5e-05	1
511.836	2	0.059	(R)IGVCTGIFR(T)		120523_08_SE_1a_3_ctrl	33.8688	303	311	28.2	0.028	1
532.827	2	0.024	(R)VQLAETYLK(E)		120523_08_SE_1a_3_ctrl	26.6552	400	408	20.1	0.093	1
5 Acc. #: 165 Species: UNREADABLE Name: gi|1092181944|gb|AOY41462.1| PsbB (chloroplast) [Haberlea rhodopensis]
Version: 1
Protein MW: 54184.5 Protein pI: 6.5 Protein Length: 490 Index: 165
Num Unique	% Cov	Best Disc Score	Best Expect Val
6	19.8	4.05	2.1e-05
m/z	z	Da	DB Peptide	Variable Mods	Fraction	RT	Start	End	Score	Expect	# in DB
679.87	2	0.037	(R)QGMFVIPFMTR(L)	Oxidation@3;Oxidation@9	120523_08_SE_1a_3_ctrl	43.8351	58	68	16.6	0.33	4
962.471	2	0.034	(R)YQWDQGYFQQEIYR(R)		120523_08_SE_1a_3_ctrl	46.9953	273	286	50.3	2.9e-05	5
910.467	2	0.022	(R)VSNGLAENQSLSEAWSK(I)		120523_08_SE_1a_3_ctrl	31.8712	288	304	37.6	2.1e-05	2
743.378	2	0.006	(K)LAFYDYIGNNPAK(G)		120523_08_SE_1a_3_ctrl	42.2011	309	321	43.1	0.00017	5
729.357	3	0.0042	(R)AGSMDNGDGIAVGWLGHPIFR(D)	Oxidation@4	120523_08_SE_1a_3_ctrl	55.759	327	347	28.1	0.0003	5
804.385	3	-0.034	(R)RMPTFFETFPVVLVDGDGIVR(A)	Oxidation@2	120523_08_SE_1a_3_ctrl	72.2608	358	378	36.3	0.001	5
6 Acc. #: 24314 Species: UNREADABLE Name: gi|1024013872|gb|KZV34753.1| hypothetical protein F511_00655 [Dorcoceras hygrometricum]
Version: 1
Protein MW: 51929.2 Protein pI: 6.4 Protein Length: 477 Index: 24314
Num Unique	% Cov	Best Disc Score	Best Expect Val
7	22.9	2.98	3.4e-05
m/z	z	Da	DB Peptide	Variable Mods	Fraction	RT	Start	End	Score	Expect	# in DB
967.436	2	-0.081	(K)TTLTAALTMALASVGNSAPK(K)	Oxidation@9	120523_08_SE_1a_3_ctrl	70.3063	94	113	35.1	0.00063	1
718.462	2	0.12	(K)KYDEIDAAPEER(A)		120523_08_SE_1a_3_ctrl	12.3842	114	125	40.2	0.00047	1
899.426	2	-0.021	(R)GITINTATVEYETETR(H)		120523_08_SE_1a_3_ctrl	34.7557	128	143	40.4	3.4e-05	1
859.951	2	0.026	(K)LMDEVDNYIPIPQR(Q)	Oxidation@2	120523_08_SE_1a_3_ctrl	40.3337	270	283	30.8	0.00017	1
1078.02	2	-0.025	(R)QTDLPFLMAVEDVFSITGR(G)	Oxidation@8	120523_08_SE_1a_3_ctrl	97.6506	284	302	32.7	0.00024	1
672.376	2	0.046	(R)STTVTGVEMFQK(T)	Oxidation@9	120523_08_SE_1a_3_ctrl	18.4995	331	342	31.9	0.0018	1
845.642	2	0.21	(K)TLDDAMAGDNVGLLLR(G)	Oxidation@6	120523_08_SE_1a_3_ctrl	43.607	343	358	33.3	7.9e-05	1
7 Acc. #: 7813 Species: UNREADABLE Name: gi|1024051708|gb|KZV51254.1| glucose-1-phosphate adenylyltransferase [Dorcoceras hygrometricum]
Version: 1
Protein MW: 57134.9 Protein pI: 7.1 Protein Length: 521 Index: 7813
Num Unique	% Cov	Best Disc Score	Best Expect Val
6	18.6	3.3	0.00039
m/z	z	Da	DB Peptide	Variable Mods	Fraction	RT	Start	End	Score	Expect	# in DB
910.924	2	-0.024	(R)LIDIPVSNCMNSNISK(I)	Oxidation@10	120523_08_SE_1a_3_ctrl	30.3819	128	143	18.8	0.048	1
813.446	2	0.0099	(K)IYVLTQFNSASLNR(H)		120523_08_SE_1a_3_ctrl	44.5979	144	157	47.6	0.00039	1
945.926	2	-0.015	(R)ETDADITVAALPMDEQR(A)	Oxidation@13	120523_08_SE_1a_3_ctrl	30.0562	235	251	26.3	0.0081	1
884.405	2	-0.015	(K)EMPYIASMGIYVFSK(D)	Oxidation@2;Oxidation@8	120523_08_SE_1a_3_ctrl	44.5557	297	311	26.1	0.011	1
794.758	3	0.04	(R)EKFPGANDFGSEVIPGATSVGMR(V)	Oxidation@22	120523_08_SE_1a_3_ctrl	40.737	320	342	23.5	0.06	1
665.36	2	0.018	(K)IINSDNVQEAAR(E)		120523_08_SE_1a_3_ctrl	12.7886	484	495	41	0.00074	1
8 Acc. #: 31469 Species: UNREADABLE Name: gi|1023996074|gb|KZV27598.1| phosphoglycerate kinase, chloroplastic-like [Dorcoceras hygrometricum]
Version: 1
Protein MW: 50605.9 Protein pI: 6.4 Protein Length: 481 Index: 31469
Num Unique	% Cov	Best Disc Score	Best Expect Val
6	15.4	3.12	7.3e-05
m/z	z	Da	DB Peptide	Variable Mods	Fraction	RT	Start	End	Score	Expect	# in DB
508.281	2	-0.02	(K)YSLAPLVPR(L)		120523_08_SE_1a_3_ctrl	37.0217	150	158	29.7	0.00028	1
724.487	2	0.05	(K)FLKPSVAGFLLQK(E)		120523_08_SE_1a_3_ctrl	49.3603	241	253	41.1	0.0007	1
936.663	3	0.47	(K)FLKPSVAGFLLQKELDYLVGAVSSPK(R)		120523_08_SE_1a_3_ctrl	89.8755	241	266	19.9	0.063	1
689.354	2	-0.013	(K)ELDYLVGAVSSPK(R)		120523_08_SE_1a_3_ctrl	38.1848	254	266	43.1	0.00014	1
1135.57	2	-0.0035	(K)VVPSSAIPDGWMGLDIGPDSIK(T)	Oxidation@12	120523_08_SE_1a_3_ctrl	56.2234	360	381	34.6	7.3e-05	1
787.379	2	-0.047	(K)GVTTIIGGGDSVAAVEK(V)		120523_08_SE_1a_3_ctrl	32.4158	425	441	42.6	9.7e-05	3
8-1 Acc. #: 7802 Species: UNREADABLE Name: gi|1024051719|gb|KZV51265.1| phosphoglycerate kinase, chloroplastic-like [Dorcoceras hygrometricum]
Version: 1
Protein MW: 48578.3 Protein pI: 6.1 Protein Length: 465 Index: 7802
Num Unique	% Cov	Best Disc Score	Best Expect Val
4	13.1	3.39	1.4e-05
m/z	z	Da	DB Peptide	Variable Mods	Fraction	RT	Start	End	Score	Expect	# in DB
678.325	2	-0.019	(R)ADLNVPLDENQK(I)		120523_08_SE_1a_3_ctrl	22.9882	99	110	23.4	0.057	1
890.02	2	-0.0027	(K)LVASLPEGGVLLLENVR(F)		120523_08_SE_1a_3_ctrl	63.1365	181	197	43	1.4e-05	1
885.448	2	0.016	(K)TVIWNGPMGVFEFEK(F)	Oxidation@8	120523_08_SE_1a_3_ctrl	55.292	376	390	40.3	0.00015	1
787.379	2	-0.047	(K)GVTTIIGGGDSVAAVEK(V)		120523_08_SE_1a_3_ctrl	32.4158	409	425	42.6	9.7e-05	3
9 Acc. #: 167 Species: UNREADABLE Name: gi|1092181942|gb|AOY41460.1| ATP synthase CF1 beta subunit (chloroplast) [Haberlea rhodopensis]
Version: 1
Protein MW: 53852.3 Protein pI: 5.1 Protein Length: 498 Index: 167
Num Unique	% Cov	Best Disc Score	Best Expect Val
6	23.9	3.13	3e-05
m/z	z	Da	DB Peptide	Variable Mods	Fraction	RT	Start	End	Score	Expect	# in DB
1057.09	2	0.035	(R)GMEVIDTGAPLSVPVGGATLGR(I)	Oxidation@2	120523_08_SE_1a_3_ctrl	44.684	88	109	38.3	3e-05	2
978.017	2	0.0018	(R)IFNVLGEPVDNLGPVDTR(T)		120523_08_SE_1a_3_ctrl	53.8451	110	127	34.9	0.0029	4
975.398	2	-0.1	(R)DVNEQDVLLFIDNIFR(F)		120523_08_SE_1a_3_ctrl	94.7313	262	277	24.6	0.019	4
717.414	2	0.023	(R)FVQAGSEVSALLGR(M)		120523_08_SE_1a_3_ctrl	45.8882	278	291	41.7	0.00051	4
1039.01	2	-0.0066	(K)GIYPAVDPLDSTSTMLQPR(I)	Oxidation@15	120523_08_SE_1a_3_ctrl	44.0184	360	378	33.5	0.00032	5
1080.89	3	0.0047	(R)GFQSILSGELDGLPEQAFYLVGNIDEVTTK(A)		120523_08_SE_1a_3_ctrl	91.9761	457	486	16.3	0.28	4
10 Acc. #: 40529 Species: UNREADABLE Name: gi|1023974503|gb|KZV18538.1| fructose-1,6-bisphosphatase, chloroplastic-like [Dorcoceras hygrometricum]
Version: 1
Protein MW: 44898.2 Protein pI: 5.1 Protein Length: 412 Index: 40529
Num Unique	% Cov	Best Disc Score	Best Expect Val
4	11.9	4.24	2e-06
m/z	z	Da	DB Peptide	Variable Mods	Fraction	RT	Start	End	Score	Expect	# in DB
457.82	2	0.045	(K)QIASLVQR(A)		120523_08_SE_1a_3_ctrl	16.3823	109	116	20.4	0.17	1
632.327	2	-0.00078	(R)YIGSLVGDFHR(T)		120523_08_SE_1a_3_ctrl	33.4146	324	334	34	0.0028	1
686.879	2	0.012	(R)TLLYGGIYGYPR(D)		120523_08_SE_1a_3_ctrl	41.5734	335	346	41.5	1.5e-05	1
1015	2	0.0055	(R)LLYECAPMSFIVEQAGGK(G)	Oxidation@8	120523_08_SE_1a_3_ctrl	44.3172	357	374	48.3	2e-06	1
11 Acc. #: 36526 Species: UNREADABLE Name: gi|1023983841|gb|KZV22541.1| actin-7 [Dorcoceras hygrometricum]
Version: 1
Protein MW: 36930.6 Protein pI: 5.5 Protein Length: 329 Index: 36526
Num Unique	% Cov	Best Disc Score	Best Expect Val
5	21.6	3.31	3.5e-05
m/z	z	Da	DB Peptide	Variable Mods	Fraction	RT	Start	End	Score	Expect	# in DB
589.792	2	0.031	(R)GYMFTTSAER(E)	Oxidation@3	120523_08_SE_1a_3_ctrl	15.8461	151	160	29.3	0.00078	1
887.926	2	-0.026	(K)NYELPDGQVITIGAER(F)		120523_08_SE_1a_3_ctrl	44.9072	193	208	43.8	3.5e-05	2
1099.99	2	-0.05	(K)DLYGNIVLSGGSTMFPGIADR(M)	Oxidation@14	120523_08_SE_1a_3_ctrl	55.6312	246	266	32.7	0.00088	3
582.348	2	0.046	(K)EITALAPSSMK(I)	Oxidation@10	120523_08_SE_1a_3_ctrl	14.9979	270	280	24.9	0.0058	4
738.322	2	-0.02	(K)SEYDESGPSIVHR(K)		120523_08_SE_1a_3_ctrl	14.4895	314	326	15.4	4.5	1
12 Acc. #: 12881 Species: UNREADABLE Name: gi|1024042852|gb|KZV46186.1| transketolase, chloroplastic [Dorcoceras hygrometricum]
Version: 1
Protein MW: 79963.3 Protein pI: 6.3 Protein Length: 743 Index: 12881
Num Unique	% Cov	Best Disc Score	Best Expect Val
4	9.3	4.41	1.2e-06
m/z	z	Da	DB Peptide	Variable Mods	Fraction	RT	Start	End	Score	Expect	# in DB
795.367	2	-0.027	(K)ALPTYTPETPGDATR(N)		120523_08_SE_1a_3_ctrl	23.6759	422	436	26.1	0.011	1
657.374	2	0.011	(R)NLSQQNLNALAK(V)		120523_08_SE_1a_3_ctrl	22.7879	437	448	35.6	0.0041	2
1037.05	2	-0.016	(K)VLPGLLGGSADLASSNMTLLK(M)	Oxidation@17	120523_08_SE_1a_3_ctrl	55.019	449	469	49.2	1.2e-06	2
755.773	3	0.068	(R)AMPNILMLRPADGNETAGSYK(V)	Oxidation@2=19	120523_08_SE_1a_3_ctrl	34.2919	564	584	18.1	3.2	1
12-1 Acc. #: 11723 Species: UNREADABLE Name: gi|1024044403|gb|KZV47344.1| transketolase [Dorcoceras hygrometricum]
Version: 1
Protein MW: 80436.7 Protein pI: 6.1 Protein Length: 742 Index: 11723
Num Unique	% Cov	Best Disc Score	Best Expect Val
3	6.3	4.41	1.2e-06
m/z	z	Da	DB Peptide	Variable Mods	Fraction	RT	Start	End	Score	Expect	# in DB
657.374	2	0.011	(R)NLSQQNLNALAK(V)		120523_08_SE_1a_3_ctrl	22.7879	436	447	35.6	0.0041	2
1037.05	2	-0.016	(K)VLPGLLGGSADLASSNMTLLK(M)	Oxidation@17	120523_08_SE_1a_3_ctrl	55.019	448	468	49.2	1.2e-06	2
721.441	2	0.042	(K)LAQLPGTSIEGVEK(G)		120523_08_SE_1a_3_ctrl	30.9915	602	615	34.4	0.00011	1
13 Acc. #: 5712 Species: UNREADABLE Name: gi|1024055199|gb|KZV53355.1| fructose-bisphosphate aldolase 1, chloroplastic [Dorcoceras hygrometricum]
Version: 1
Protein MW: 43384.9 Protein pI: 7.6 Protein Length: 405 Index: 5712
Num Unique	% Cov	Best Disc Score	Best Expect Val
6	19.8	2.79	7.7e-05
m/z	z	Da	DB Peptide	Variable Mods	Fraction	RT	Start	End	Score	Expect	# in DB
694.373	2	0.01	(R)LASIGLENTEANR(Q)		120523_08_SE_1a_3_ctrl	22.2956	84	96	39.9	7.7e-05	2
882.521	2	-0.014	(K)KIVDVLVEQNIVPGIK(V)		120523_08_SE_1a_3_ctrl	50.1309	132	147	19.2	0.18	2
818.437	2	-0.051	(K)IVDVLVEQNIVPGIK(V)		120523_08_SE_1a_3_ctrl	53.3866	133	147	28.7	0.0034	2
726.89	2	-0.035	(R)TVVSIPNGPSALAVK(E)		120523_08_SE_1a_3_ctrl	37.4744	189	203	31.2	0.0023	2
437.209	2	-0.024	(K)EAAWGLAR(Y)		120523_08_SE_1a_3_ctrl	21.5642	204	211	23.8	0.32	3
1002.17	3	-0.026	(R)YAAISQEAGLVPIVEPEILLDGEHGIDR(T)		120523_08_SE_1a_3_ctrl	68.473	212	239	28.6	0.01	1
13-1 Acc. #: 1539 Species: UNREADABLE Name: gi|1024062619|gb|KZV57528.1| fructose-bisphosphate aldolase 1, chloroplastic [Dorcoceras hygrometricum]
Version: 1
Protein MW: 42718.1 Protein pI: 6.9 Protein Length: 398 Index: 1539
Num Unique	% Cov	Best Disc Score	Best Expect Val
6	16.1	2.79	7.7e-05
m/z	z	Da	DB Peptide	Variable Mods	Fraction	RT	Start	End	Score	Expect	# in DB
694.373	2	0.01	(R)LASIGLENTEANR(Q)		120523_08_SE_1a_3_ctrl	22.2956	85	97	39.9	7.7e-05	2
882.521	2	-0.014	(K)KIVDVLVEQNIVPGIK(V)		120523_08_SE_1a_3_ctrl	50.1309	133	148	19.2	0.18	2
818.437	2	-0.051	(K)IVDVLVEQNIVPGIK(V)		120523_08_SE_1a_3_ctrl	53.3866	134	148	28.7	0.0034	2
726.89	2	-0.035	(R)TVVSIPNGPSALAVK(E)		120523_08_SE_1a_3_ctrl	37.4744	190	204	31.2	0.0023	2
437.209	2	-0.024	(K)EAAWGLAR(Y)		120523_08_SE_1a_3_ctrl	21.5642	205	212	23.8	0.32	3
668.326	2	-0.018	(K)ATPEQVADYTLK(L)		120523_08_SE_1a_3_ctrl	28.4605	283	294	23.5	0.011	1
14 Acc. #: 163 Species: UNREADABLE Name: gi|1092181946|gb|AOY41464.1| photosystem II CP43 chlorophyll apoprotein (chloroplast) [Haberlea rhodopensis]
Version: 1
Protein MW: 51910.3 Protein pI: 6.7 Protein Length: 473 Index: 163
Num Unique	% Cov	Best Disc Score	Best Expect Val
4	16.7	2.1	0.00032
m/z	z	Da	DB Peptide	Variable Mods	Fraction	RT	Start	End	Score	Expect	# in DB
938.961	2	-0.1	(K)ITNLTLSPSIIFGFLLK(S)		120523_08_SE_1a_3_ctrl	94.7765	199	215	28.4	0.0023	2
713.938	2	0.052	(R)LGANVGSAQGPTGLGK(Y)		120523_08_SE_1a_3_ctrl	17.9232	324	339	35.3	0.00032	4
748.854	2	-0.0024	(R)SPTGEVIFGGETMR(F)	Oxidation@13	120523_08_SE_1a_3_ctrl	26.6173	344	357	23.1	0.038	4
1107.53	3	-0.02	(R)SAEYMTHAPLGSLNSVGGVATEINAVNYVSPR(S)	Oxidation@5	120523_08_SE_1a_3_ctrl	53.1552	392	423	27.5	0.0018	4
15 Acc. #: 21884 Species: UNREADABLE Name: gi|1024019037|gb|KZV37183.1| aminomethyltransferase, mitochondrial [Dorcoceras hygrometricum]
Version: 1
Protein MW: 44416.2 Protein pI: 8.5 Protein Length: 408 Index: 21884
Num Unique	% Cov	Best Disc Score	Best Expect Val
3	14.7	2.9	1.4e-05
m/z	z	Da	DB Peptide	Variable Mods	Fraction	RT	Start	End	Score	Expect	# in DB
843.898	2	-0.0063	(K)MVPFAGWSMPIQYK(D)	Oxidation@1;Oxidation@9	120523_08_SE_1a_3_ctrl	45.7114	52	65	38.1	4.8e-05	1
763.021	3	-0.068	(K)LVIADVAGLAPGTGTLTVFTNEK(G)		120523_08_SE_1a_3_ctrl	64.5727	104	126	24.8	0.15	1
808.031	3	-0.021	(R)TGYTGEDGFEISVPSEHAVDLAK(A)		120523_08_SE_1a_3_ctrl	44.1146	226	248	36	1.4e-05	1
16 Acc. #: 11844 Species: UNREADABLE Name: gi|1024044281|gb|KZV47223.1| citrate synthase, mitochondrial [Dorcoceras hygrometricum]
Version: 1
Protein MW: 54380.4 Protein pI: 8.5 Protein Length: 488 Index: 11844
Num Unique	% Cov	Best Disc Score	Best Expect Val
3	10.9	2.61	0.00012
m/z	z	Da	DB Peptide	Variable Mods	Fraction	RT	Start	End	Score	Expect	# in DB
867.904	2	-0.044	(K)VQLGNITVDMVIGGMR(G)	Oxidation@10;Oxidation@15	120523_08_SE_1a_3_ctrl	47.8257	82	97	30.8	0.0037	1
1067.03	2	0.0035	(R)GMTGLLWETSLLDPEEGIR(F)	Oxidation@2	120523_08_SE_1a_3_ctrl	66.0597	98	116	38.8	0.00012	2
998.533	2	-0.057	(K)LVSNLYEVVPPILLELGK(V)		120523_08_SE_1a_3_ctrl	84.2938	399	416	22.5	0.048	1
17 Acc. #: 31129 Species: UNREADABLE Name: gi|1023997232|gb|KZV27938.1| monodehydroascorbate reductase [Dorcoceras hygrometricum]
Version: 1
Protein MW: 46992.8 Protein pI: 5.5 Protein Length: 434 Index: 31129
Num Unique	% Cov	Best Disc Score	Best Expect Val
2	6	2.96	0.00075
m/z	z	Da	DB Peptide	Variable Mods	Fraction	RT	Start	End	Score	Expect	# in DB
715.921	2	0.036	(K)EAVAPYERPALSK(G)		120523_08_SE_1a_3_ctrl	15.9448	40	52	30.9	0.00075	2
729.353	2	0.44	(R)EIIDADELVKAIK(S)		120523_08_SE_1a_3_ctrl	59.9334	147	159	45.3	0.0014	1
17-1 Acc. #: 10122 Species: UNREADABLE Name: gi|1024047516|gb|KZV48945.1| Monodehydroascorbate reductase family protein [Dorcoceras hygrometricum]
Version: 1
Protein MW: 31957.1 Protein pI: 6.8 Protein Length: 297 Index: 10122
Num Unique	% Cov	Best Disc Score	Best Expect Val
2	10.1	1.52	0.00075
m/z	z	Da	DB Peptide	Variable Mods	Fraction	RT	Start	End	Score	Expect	# in DB
715.921	2	0.036	(K)EAVAPYERPALSK(A)		120523_08_SE_1a_3_ctrl	15.9448	40	52	30.9	0.00075	2
978.88	2	-0.093	(R)LFTAGIAAFYEDYYANK(G)		120523_08_SE_1a_3_ctrl	63.7667	202	218	29.9	0.013	2
18 Acc. #: 10425 Species: UNREADABLE Name: gi|1024047173|gb|KZV48642.1| heat shock protein [Dorcoceras hygrometricum]
Version: 1
Protein MW: 74992.3 Protein pI: 5.3 Protein Length: 703 Index: 10425
Num Unique	% Cov	Best Disc Score	Best Expect Val
2	4.1	3.51	8.6e-06
m/z	z	Da	DB Peptide	Variable Mods	Fraction	RT	Start	End	Score	Expect	# in DB
862.443	2	-0.0054	(R)IINEPTAASLAYGFEK(K)		120523_08_SE_1a_3_ctrl	43.7915	233	248	43.5	8.6e-06	2
798.419	2	0.029	(R)AKFEELCSDLLDR(L)		120523_08_SE_1a_3_ctrl	39.7884	363	375	25	0.033	2
19 Acc. #: 32915 Species: UNREADABLE Name: gi|1023992247|gb|KZV26152.1| hypothetical protein F511_06319 [Dorcoceras hygrometricum]
Version: 1
Protein MW: 45170.7 Protein pI: 10.3 Protein Length: 410 Index: 32915
Num Unique	% Cov	Best Disc Score	Best Expect Val
1	3.9	5.35	2.7e-08
m/z	z	Da	DB Peptide	Variable Mods	Fraction	RT	Start	End	Score	Expect	# in DB
965.444	2	0.038	(K)TMISDSDYTEFENFSK(W)	Oxidation@2	120523_08_SE_1a_3_ctrl	38.612	389	404	52.3	2.7e-08	1
20 Acc. #: 15615 Species: UNREADABLE Name: gi|1024035148|gb|KZV43452.1| V-type proton ATPase catalytic subunit A-like [Dorcoceras hygrometricum]
Version: 1
Protein MW: 68495.9 Protein pI: 5.2 Protein Length: 623 Index: 15615
Num Unique	% Cov	Best Disc Score	Best Expect Val
3	9.3	2.53	8.9e-05
m/z	z	Da	DB Peptide	Variable Mods	Fraction	RT	Start	End	Score	Expect	# in DB
700.615	4	-0.038	(R)THKPLSVELGPGILGNIFDGIQRPLK(T)		120523_08_SE_1a_3_ctrl	69.24	85	110	33.5	0.016	1
780.971	2	-0.43	(R)TTLVANTSNMPVAAR(E)	Oxidation@10	120523_08_SE_1a_3_ctrl	14.7721	312	326	16.9	1.8	2
906.432	2	-0.0031	(R)LAEMPADSGYPAYLAAR(L)	Oxidation@4	120523_08_SE_1a_3_ctrl	31.035	368	384	37.5	8.9e-05	2
21 Acc. #: 6655 Species: UNREADABLE Name: gi|1024053701|gb|KZV52412.1| catalase isozyme 1, partial [Dorcoceras hygrometricum]
Version: 1
Protein MW: 56636.5 Protein pI: 6.6 Protein Length: 488 Index: 6655
Num Unique	% Cov	Best Disc Score	Best Expect Val
3	9.2	2.09	0.00095
m/z	z	Da	DB Peptide	Variable Mods	Fraction	RT	Start	End	Score	Expect	# in DB
992.97	2	-0.029	(R)EGNFDLVGNNFPVFFIR(D)		120523_08_SE_1a_3_ctrl	60.0787	126	142	37	0.00095	2
810.87	2	-0.071	(K)TWPEDILPLQPVGR(M)		120523_08_SE_1a_3_ctrl	57.4239	288	301	24.2	0.13	1
762.548	2	0.12	(R)LGPNYLQLPVNAPK(C)		120523_08_SE_1a_3_ctrl	43.9755	352	365	28.7	0.015	1
22 Acc. #: 44098 Species: UNREADABLE Name: gi|1023966618|gb|KZV14969.1| glutamine synthetase nodule isozyme [Dorcoceras hygrometricum]
Version: 1
Protein MW: 39311.6 Protein pI: 6.0 Protein Length: 355 Index: 44098
Num Unique	% Cov	Best Disc Score	Best Expect Val
1	5.4	4.27	9.5e-07
m/z	z	Da	DB Peptide	Variable Mods	Fraction	RT	Start	End	Score	Expect	# in DB
1119.09	2	0.012	(K)VAAEVPWYGIEQEYTLLQK(D)		120523_08_SE_1a_3_ctrl	66.0154	118	136	47.4	9.5e-07	1
23 Acc. #: 15920 Species: UNREADABLE Name: gi|1024034630|gb|KZV43147.1| citrate synthase, glyoxysomal [Dorcoceras hygrometricum]
Version: 1
Protein MW: 56153.0 Protein pI: 8.6 Protein Length: 512 Index: 15920
Num Unique	% Cov	Best Disc Score	Best Expect Val
2	10	2.06	0.0014
m/z	z	Da	DB Peptide	Variable Mods	Fraction	RT	Start	End	Score	Expect	# in DB
820.29	4	-0.14	(R)HLASSGVDVYTALAGAVGALYGPLHGGANEAVLK(M)		120523_08_SE_1a_3_ctrl	78.3788	301	334	37.3	0.0021	1
978.71	2	0.2	(R)AMGFPTEFFPVLFAIPR(M)	Oxidation@2	120523_08_SE_1a_3_ctrl	85.8874	429	445	28.7	0.0014	1
24 Acc. #: 13187 Species: UNREADABLE Name: gi|1024042478|gb|KZV45880.1| polyphenol oxidase, chloroplastic-like [Dorcoceras hygrometricum]
Version: 1
Protein MW: 66052.4 Protein pI: 6.7 Protein Length: 593 Index: 13187
Num Unique	% Cov	Best Disc Score	Best Expect Val
2	5.6	2.01	0.001
m/z	z	Da	DB Peptide	Variable Mods	Fraction	RT	Start	End	Score	Expect	# in DB
1094.54	2	-0.0079	(K)LINDPTFALPFWNWDNPK(G)		120523_08_SE_1a_3_ctrl	77.3989	223	240	36.4	0.001	1
799.258	2	-0.11	(R)QPSGEDLGNFYSAGR(D)		120523_08_SE_1a_3_ctrl	26.7799	340	354	25.7	0.014	2
24-1 Acc. #: 4625 Species: UNREADABLE Name: gi|1024057280|gb|KZV54442.1| polyphenol oxidase, chloroplastic-like [Dorcoceras hygrometricum]
Version: 1
Protein MW: 65201.2 Protein pI: 5.9 Protein Length: 587 Index: 4625
Num Unique	% Cov	Best Disc Score	Best Expect Val
2	4.8	0.51	0.014
m/z	z	Da	DB Peptide	Variable Mods	Fraction	RT	Start	End	Score	Expect	# in DB
799.258	2	-0.11	(R)QPSGEDLGNFYSAGR(D)		120523_08_SE_1a_3_ctrl	26.7799	337	351	25.7	0.014	2
478.258	3	0.0001	(K)AAYIGTYAQIPHK(T)		120523_08_SE_1a_3_ctrl	24.842	511	523	20.8	0.17	1
25 Acc. #: 38979 Species: UNREADABLE Name: gi|1023977901|gb|KZV20088.1| peroxidase 12 [Dorcoceras hygrometricum]
Version: 1
Protein MW: 38257.5 Protein pI: 6.9 Protein Length: 351 Index: 38979
Num Unique	% Cov	Best Disc Score	Best Expect Val
1	4.3	2.43	0.00012
m/z	z	Da	DB Peptide	Variable Mods	Fraction	RT	Start	End	Score	Expect	# in DB
873.436	2	0.033	(R)QGLFTSDQDLYTDSR(T)		120523_08_SE_1a_3_ctrl	35.8949	269	283	36.9	0.00012	1
26 Acc. #: 26097 Species: UNREADABLE Name: gi|1024009339|gb|KZV32970.1| succinyl-CoA ligase [Dorcoceras hygrometricum]
Version: 1
Protein MW: 45181.6 Protein pI: 6.1 Protein Length: 422 Index: 26097
Num Unique	% Cov	Best Disc Score	Best Expect Val
1	6.2	2.28	0.0001
m/z	z	Da	DB Peptide	Variable Mods	Fraction	RT	Start	End	Score	Expect	# in DB
872.083	3	-0.018	(K)LHGGTPANFLDVGGNASEGQVVEAFK(I)		120523_08_SE_1a_3_ctrl	51.0541	313	338	35.2	0.0001	1
27 Acc. #: 5263 Species: UNREADABLE Name: gi|1024056099|gb|KZV53804.1| isocitrate dehydrogenase [Dorcoceras hygrometricum]
Version: 1
Protein MW: 46198.3 Protein pI: 6.2 Protein Length: 412 Index: 5263
Num Unique	% Cov	Best Disc Score	Best Expect Val
2	7.8	1.52	0.0004
m/z	z	Da	DB Peptide	Variable Mods	Fraction	RT	Start	End	Score	Expect	# in DB
854.856	2	-0.023	(K)VANPIVEMDGDEMTR(V)	Oxidation@8;Oxidation@13	120523_08_SE_1a_3_ctrl	16.5814	8	22	29.9	0.0004	1
899.615	2	0.17	(K)GGETSTNSIASIFAWTR(G)		120523_08_SE_1a_3_ctrl	62.4574	324	340	23.1	0.043	1
28 Acc. #: 24100 Species: UNREADABLE Name: gi|1024014095|gb|KZV34967.1| sedoheptulose-1,7-bisphosphatase, chloroplastic-like [Dorcoceras hygrometricum]
Version: 1
Protein MW: 127900.8 Protein pI: 7.3 Protein Length: 1162 Index: 24100
Num Unique	% Cov	Best Disc Score	Best Expect Val
3	5.2	1.05	0.035
m/z	z	Da	DB Peptide	Variable Mods	Fraction	RT	Start	End	Score	Expect	# in DB
841.65	4	0.46	(K)YKDDPDLAALQPSLTEGDAAMVQIPVLHPLK(L)	Oxidation@21	120523_08_SE_1a_3_ctrl	87.2338	714	744	20.9	8.6	1
825.438	2	0.0063	(R)YTGGMVPDVNQIIVK(E)	Oxidation@5	120523_08_SE_1a_3_ctrl	37.1217	1058	1072	20.1	0.12	1
794.925	2	-0.046	(R)LLFEVAPLGFLIEK(A)		120523_08_SE_1a_3_ctrl	81.7335	1091	1104	32.5	0.035	1
29 Acc. #: 161 Species: UNREADABLE Name: gi|1092181948|gb|AOY41466.1| photosystem II protein D2 (chloroplast) [Haberlea rhodopensis]
Version: 1
Protein MW: 39593.9 Protein pI: 5.3 Protein Length: 353 Index: 161
Num Unique	% Cov	Best Disc Score	Best Expect Val
2	9.9	1.09	0.0068
m/z	z	Da	DB Peptide	Variable Mods	Fraction	RT	Start	End	Score	Expect	# in DB
774.361	2	0.012	(R)AAEDPEFETFYTK(N)		120523_08_SE_1a_3_ctrl	34.7994	306	318	23.6	0.021	4
879.677	3	-0.087	(R)AWMATQDQPHENLIFPEEVLPR(G)	Oxidation@3	120523_08_SE_1a_3_ctrl	52.924	328	349	30.3	0.0068	2
30 Acc. #: 160 Species: UNREADABLE Name: gi|1092181949|gb|AOY41467.1| photosystem II protein D1 (chloroplast) [Haberlea rhodopensis]
Version: 1
Protein MW: 38863.8 Protein pI: 5.1 Protein Length: 352 Index: 160
Num Unique	% Cov	Best Disc Score	Best Expect Val
1	3.1	1.85	0.0009
m/z	z	Da	DB Peptide	Variable Mods	Fraction	RT	Start	End	Score	Expect	# in DB
657.852	2	-0.0094	(R)VINTWADIINR(A)		120523_08_SE_1a_3_ctrl	45.4699	313	323	34.5	0.0009	4
31 Acc. #: 18345 Species: UNREADABLE Name: gi|1024029208|gb|KZV40722.1| chlorophyll a/b-binding family protein [Dorcoceras hygrometricum]
Version: 1
Protein MW: 28369.4 Protein pI: 6.0 Protein Length: 263 Index: 18345
Num Unique	% Cov	Best Disc Score	Best Expect Val
1	8.7	1.77	0.00048
m/z	z	Da	DB Peptide	Variable Mods	Fraction	RT	Start	End	Score	Expect	# in DB
1204.55	2	-0.032	(K)VYPGGAFDPLGLADDPDTFAELK(V)		120523_08_SE_1a_3_ctrl	68.7981	186	208	32.7	0.00048	1
32 Acc. #: 19725 Species: UNREADABLE Name: gi|1024024940|gb|KZV39342.1| V-type proton ATPase subunit B 2 [Dorcoceras hygrometricum]
Version: 1
Protein MW: 54274.2 Protein pI: 5.0 Protein Length: 488 Index: 19725
Num Unique	% Cov	Best Disc Score	Best Expect Val
1	3.1	1.77	0.0022
m/z	z	Da	DB Peptide	Variable Mods	Fraction	RT	Start	End	Score	Expect	# in DB
858.422	2	-0.048	(R)VTLFLNLANDPTIER(I)		120523_08_SE_1a_3_ctrl	55.9527	235	249	35.2	0.0022	1
33 Acc. #: 322 Species: UNREADABLE Name: gi|1024064765|gb|KZV58745.1| glyceraldehyde-3-phosphate dehydrogenase, cytosolic [Dorcoceras hygrometricum]
Version: 1
Protein MW: 32179.9 Protein pI: 6.7 Protein Length: 295 Index: 322
Num Unique	% Cov	Best Disc Score	Best Expect Val
1	4.7	1.67	0.0006
m/z	z	Da	DB Peptide	Variable Mods	Fraction	RT	Start	End	Score	Expect	# in DB
749.934	2	0.0063	(R)VPTVDVSVVDLTVR(L)		120523_08_SE_1a_3_ctrl	49.2172	195	208	32	0.0006	2
34 Acc. #: 15573 Species: UNREADABLE Name: gi|1024035201|gb|KZV43494.1| hypothetical protein F511_19038 [Dorcoceras hygrometricum]
Version: 1
Protein MW: 33634.0 Protein pI: 7.0 Protein Length: 309 Index: 15573
Num Unique	% Cov	Best Disc Score	Best Expect Val
2	14.6	1.55	0.00031
m/z	z	Da	DB Peptide	Variable Mods	Fraction	RT	Start	End	Score	Expect	# in DB
808.195	4	-0.22	(-)MIARGAMLGPDQPVIIHMLDIEPAMEALR(G)	Acetyl@N-term	120523_08_SE_1a_3_ctrl	38.6558	1	29	23.8	2.7	1
825.51	2	0.0087	(K)VLVVANPANTNALILK(E)		120523_08_SE_1a_3_ctrl	45.6677	104	119	29.8	0.00031	3
35 Acc. #: 1147 Species: UNREADABLE Name: gi|1024063055|gb|KZV57920.1| ribulose bisphosphate carboxylase/oxygenase activase, chloroplastic-like [Dorcoceras hygrometricum]
Version: 1
Protein MW: 47782.9 Protein pI: 6.5 Protein Length: 425 Index: 1147
Num Unique	% Cov	Best Disc Score	Best Expect Val
1	2.6	1.56	0.00072
m/z	z	Da	DB Peptide	Variable Mods	Fraction	RT	Start	End	Score	Expect	# in DB
569.868	2	0.015	(K)VPLILGVWGGK(G)		120523_08_SE_1a_3_ctrl	56.5572	155	165	31.2	0.00072	2
36 Acc. #: 37888 Species: UNREADABLE Name: gi|1023981406|gb|KZV21179.1| hypothetical protein F511_24743 [Dorcoceras hygrometricum]
Version: 1
Protein MW: 44336.3 Protein pI: 10.1 Protein Length: 389 Index: 37888
Num Unique	% Cov	Best Disc Score	Best Expect Val
1	2.3	1.23	0.00089
m/z	z	Da	DB Peptide	Variable Mods	Fraction	RT	Start	End	Score	Expect	# in DB
492.356	2	0.081	(R)HGSLGFLPR(K)		120523_08_SE_1a_3_ctrl	25.7943	11	19	28.3	0.00089	2
37 Acc. #: 21764 Species: UNREADABLE Name: gi|1024019164|gb|KZV37303.1| hypothetical protein F511_16452 [Dorcoceras hygrometricum]
Version: 1
Protein MW: 52092.0 Protein pI: 5.8 Protein Length: 462 Index: 21764
Num Unique	% Cov	Best Disc Score	Best Expect Val
1	5.8	1.12	0.0026
m/z	z	Da	DB Peptide	Variable Mods	Fraction	RT	Start	End	Score	Expect	# in DB
978.441	3	0.29	(R)KSDVGEFPAPDPAVLVQNFNINDFNGK(W)		120523_08_SE_1a_3_ctrl	66.8313	194	220	29	0.0026	1
38 Acc. #: 29334 Species: UNREADABLE Name: gi|1024000869|gb|KZV29733.1| peroxisomal (S)-2-hydroxy-acid oxidase-like [Dorcoceras hygrometricum]
Version: 1
Protein MW: 47702.3 Protein pI: 8.4 Protein Length: 432 Index: 29334
Num Unique	% Cov	Best Disc Score	Best Expect Val
1	3	0.97	0.007
m/z	z	Da	DB Peptide	Variable Mods	Fraction	RT	Start	End	Score	Expect	# in DB
756.517	2	0.053	(K)WLQTITSLPILVK(G)		120523_08_SE_1a_3_ctrl	65.4712	281	293	29.1	0.007	1
39 Acc. #: 44142 Species: UNREADABLE Name: gi|1023966559|gb|KZV14925.1| ribulose bisphosphate carboxylase small chain, chloroplastic-like [Dorcoceras hygrometricum]
Version: 1
Protein MW: 20304.7 Protein pI: 9.3 Protein Length: 180 Index: 44142
Num Unique	% Cov	Best Disc Score	Best Expect Val
1	10	0.97	0.002
m/z	z	Da	DB Peptide	Variable Mods	Fraction	RT	Start	End	Score	Expect	# in DB
716.945	3	-0.12	(R)KFETLSYLPPLTEEQLLK(Q)		120523_08_SE_1a_3_ctrl	58.8361	67	84	27	0.002	1
40 Acc. #: 10121 Species: UNREADABLE Name: gi|1024047517|gb|KZV48946.1| monodehydroascorbate reductase, partial [Dorcoceras hygrometricum]
Version: 1
Protein MW: 27818.4 Protein pI: 7.8 Protein Length: 257 Index: 10121
Num Unique	% Cov	Best Disc Score	Best Expect Val
1	6.6	0.95	0.013
m/z	z	Da	DB Peptide	Variable Mods	Fraction	RT	Start	End	Score	Expect	# in DB
978.88	2	-0.093	(R)LFTAGIAAFYEDYYANK(G)		120523_08_SE_1a_3_ctrl	63.7667	161	177	29.9	0.013	2
41 Acc. #: 25075 Species: UNREADABLE Name: gi|1024011819|gb|KZV33992.1| hypothetical protein F511_04217 [Dorcoceras hygrometricum]
Version: 1
Protein MW: 62283.9 Protein pI: 5.1 Protein Length: 569 Index: 25075
Num Unique	% Cov	Best Disc Score	Best Expect Val
1	6	0.63	0.09
m/z	z	Da	DB Peptide	Variable Mods	Fraction	RT	Start	End	Score	Expect	# in DB
914.375	4	0.39	(K)ASRVGEQNILVFDLGGGTFDVSLLTIEEGIFEVK(A)		120523_08_SE_1a_3_ctrl	90.5198	111	144	29.9	0.09	1
42 Acc. #: 28043 Species: UNREADABLE Name: gi|1024004405|gb|KZV31024.1| hypothetical protein F511_18128 [Dorcoceras hygrometricum]
Version: 1
Protein MW: 189898.3 Protein pI: 6.4 Protein Length: 1714 Index: 28043
Num Unique	% Cov	Best Disc Score	Best Expect Val
2	2.7	0.32	0.2
m/z	z	Da	DB Peptide	Variable Mods	Fraction	RT	Start	End	Score	Expect	# in DB
594.302	4	-0.00045	(R)RDGQDVENIILNDEILNEFK(D)		120523_08_SE_1a_3_ctrl	25.1354	210	229	27.3	0.34	1
721.047	4	0.23	(K)CNISDDHRGSLGDYFVVDGNGHGMNK(R)	Oxidation@24	120523_08_SE_1a_3_ctrl	48.3147	747	772	28.2	0.2	1
43 Acc. #: 36491 Species: UNREADABLE Name: gi|1023983880|gb|KZV22576.1| malate dehydrogenase [Dorcoceras hygrometricum]
Version: 1
Protein MW: 48045.5 Protein pI: 6.1 Protein Length: 441 Index: 36491
Num Unique	% Cov	Best Disc Score	Best Expect Val
1	3.6	0.41	0.027
m/z	z	Da	DB Peptide	Variable Mods	Fraction	RT	Start	End	Score	Expect	# in DB
837.415	2	-0.032	(R)AGLLDINGQIFAEQGK(A)		120523_08_SE_1a_3_ctrl	51.687	193	208	25.7	0.027	1
44 Acc. #: 39696 Species: UNREADABLE Name: gi|1023976267|gb|KZV19371.1| ABC transporter B family member 26, chloroplastic-like [Dorcoceras hygrometricum]
Version: 1
Protein MW: 84393.3 Protein pI: 8.9 Protein Length: 756 Index: 39696
Num Unique	% Cov	Best Disc Score	Best Expect Val
1	4	0.29	0.35
m/z	z	Da	DB Peptide	Variable Mods	Fraction	RT	Start	End	Score	Expect	# in DB
833.063	4	-0.11	(K)VYAHDFISGLPHGYDTIIDDNLLSGGQKQR(I)		120523_08_SE_1a_3_ctrl	36.9386	573	602	28.8	0.35	1
45 Acc. #: 17697 Species: UNREADABLE Name: gi|1024030354|gb|KZV41370.1| dentin sialophosphoprotein-like [Dorcoceras hygrometricum]
Version: 1
Protein MW: 134991.1 Protein pI: 4.5 Protein Length: 1244 Index: 17697
Num Unique	% Cov	Best Disc Score	Best Expect Val
1	2.4	0.24	0.43
m/z	z	Da	DB Peptide	Variable Mods	Fraction	RT	Start	End	Score	Expect	# in DB
835.368	4	-0.039	(K)GYRLPTVFPSTGELLETDAEETSDMLVSHK(S)	Oxidation@25	120523_08_SE_1a_3_ctrl	62.5149	839	868	28.6	0.43	1
46 Acc. #: 20542 Species: UNREADABLE Name: gi|1024022941|gb|KZV38525.1| hypothetical protein F511_40274 [Dorcoceras hygrometricum]
Version: 1
Protein MW: 62078.3 Protein pI: 7.1 Protein Length: 569 Index: 20542
Num Unique	% Cov	Best Disc Score	Best Expect Val
1	4.2	0.18	0.066
m/z	z	Da	DB Peptide	Variable Mods	Fraction	RT	Start	End	Score	Expect	# in DB
904.617	3	0.15	(K)IENVEGLTHFDEILQEADGIILSR(G)		120523_08_SE_1a_3_ctrl	80.4853	257	280	24.9	0.066	2
47 Acc. #: 37470 Species: UNREADABLE Name: gi|1023981933|gb|KZV21597.1| exonuclease 1-like [Dorcoceras hygrometricum]
Version: 1
Protein MW: 57751.6 Protein pI: 7.3 Protein Length: 510 Index: 37470
Num Unique	% Cov	Best Disc Score	Best Expect Val
1	3.1	0.18	0.1
m/z	z	Da	DB Peptide	Variable Mods	Fraction	RT	Start	End	Score	Expect	# in DB
958.428	2	0.44	(K)YNGVEVTPLYEEAFKR(A)		120523_08_SE_1a_3_ctrl	71.2818	263	278	25.6	0.1	1
48 Acc. #: 39097 Species: UNREADABLE Name: gi|1023977743|gb|KZV19970.1| hypothetical protein F511_19955 [Dorcoceras hygrometricum]
Version: 1
Protein MW: 16774.9 Protein pI: 10.2 Protein Length: 153 Index: 39097
Num Unique	% Cov	Best Disc Score	Best Expect Val
1	19	0.06	0.23
m/z	z	Da	DB Peptide	Variable Mods	Fraction	RT	Start	End	Score	Expect	# in DB
784.71	4	0.59	(R)WSSISRPMMGLNQSNGLGSGPGPYEHSVR(F)	Oxidation@8;Oxidation@9	120523_08_SE_1a_3_ctrl	31.9133	86	114	25.8	0.23	1
49 Acc. #: 13398 Species: UNREADABLE Name: gi|1024041822|gb|KZV45669.1| Formate dehydrogenase [Dorcoceras hygrometricum]
Version: 1
Protein MW: 42367.9 Protein pI: 7.2 Protein Length: 385 Index: 13398
Num Unique	% Cov	Best Disc Score	Best Expect Val
1	4.7	0.03	0.049
m/z	z	Da	DB Peptide	Variable Mods	Fraction	RT	Start	End	Score	Expect	# in DB
960.994	2	-0.047	(K)NLQLLITAGIGSDHIDLK(A)		120523_08_SE_1a_3_ctrl	59.977	120	137	22.9	0.049	1
50 Acc. #: 13190 Species: UNREADABLE Name: gi|1024042475|gb|KZV45877.1| hypothetical protein F511_35545, partial [Dorcoceras hygrometricum]
Version: 1
Protein MW: 33206.8 Protein pI: 9.2 Protein Length: 294 Index: 13190
Num Unique	% Cov	Best Disc Score	Best Expect Val
1	5.1	0.02	0.7
m/z	z	Da	DB Peptide	Variable Mods	Fraction	RT	Start	End	Score	Expect	# in DB
428.472	4	0.23	(R)KPSMGFLYGELLRAK(R)		120523_08_SE_1a_3_ctrl	18.97	230	244	27.2	0.7	1
51 Acc. #: 12867 Species: UNREADABLE Name: gi|1024042868|gb|KZV46200.1| acyl [Dorcoceras hygrometricum]
Version: 1
Protein MW: 37827.2 Protein pI: 5.1 Protein Length: 330 Index: 12867
Num Unique	% Cov	Best Disc Score	Best Expect Val
1	7.9	0	0.35
m/z	z	Da	DB Peptide	Variable Mods	Fraction	RT	Start	End	Score	Expect	# in DB
732.225	4	0.14	(K)IVMPAHMMYDGGDENIFGHFSAVAQR(I)	Oxidation&Oxidation@((3&(7|8))|(7&8))	120523_08_SE_1a_3_ctrl	42.0319	232	257	25.9	0.35	3
Band 1 8% RWC
ID: 4 (120523_09_SE_1_3)
Number of Proteins (After Homology Filtering): 58
Number of Peptides: 168
Search 1 Number of Data Spectra: 1333
Search 1 Proteins (Pre Homology Filtering): 91
Database: User Protein (48439/48439 entries searched)
[+] Original Search Parameters 1
Average Parent Error: 0.02
3 * StdDev: 0.54
1 Acc. #: 164 Species: UNREADABLE Name: gi|1092181945|gb|AOY41463.1| ribulose 1,5-bisphosphate carboxylase/oxygenase large subunit (chloroplast) [Haberlea rhodopensis]
Version: 1
Protein MW: 53515.3 Protein pI: 6.1 Protein Length: 483 Index: 164
Num Unique	% Cov	Best Disc Score	Best Expect Val
24	61.5	4.17	2.8e-06
m/z	z	Da	DB Peptide	Variable Mods	Fraction	RT	Start	End	Score	Expect	# in DB
704.348	2	0.011	(K)LTYYTPEYETK(D)		120523_09_SE_1_3	22.565	22	32	30.8	0.0019	2
511.248	2	-0.021	(K)DTDILAAFR(V)		120523_09_SE_1_3	47.3547	33	41	35.6	0.00041	5
964.339	4	-0.13	(R)VTPQPGVPPEEAGAAVAAESSTGTWTTVWTDGLTSLDR(Y)		120523_09_SE_1_3	72.6079	42	79	22.6	1.9	4
1306.33	4	-0.025	(R)CYHIEPVPGETDQYICYVAYPLDLFEEGSVTNMFTSIVGNVFGFK(A)	Oxidation@33	120523_09_SE_1_3	103.132	84	128	32.6	0.00087	4
733.647	2	0.27	(K)TFQGPPHGIQVER(D)		120523_09_SE_1_3	18.6977	147	159	40.5	2.1e-05	4
455.696	2	-0.03	(R)AVYECLR(G)		120523_09_SE_1_3	13.4407	188	194	20.5	0.24	4
729.589	3	0.26	(R)GGLDFTKDDENVNSQPFMR(W)	Oxidation@18	120523_09_SE_1_3	30.4223	195	213	26.6	0.029	4
723.967	3	-0.034	(R)GGLDFTKDDENVNSQPFMR(W)		120523_09_SE_1_3	37.292	195	213	26.4	0.0085	4
734.392	2	0.08	(K)DDENVNSQPFMR(W)	Oxidation@11	120523_09_SE_1_3	13.2443	202	213	32	0.0023	4
726.299	2	-0.015	(K)DDENVNSQPFMR(W)		120523_09_SE_1_3	19.7554	202	213	33.2	0.006	4
631.329	2	0.011	(R)FLFCAEAIYK(A)		120523_09_SE_1_3	48.1832	218	227	30.5	0.00084	4
992.977	2	0.04	(K)GHYLNATAGTCEEMMKR(A)	Oxidation@14|15	120523_09_SE_1_3	60.4346	237	253	17.8	2.9	4
763.909	4	0.037	(R)ELGVPIIMHDYLTGGFTANTSLAHYCR(D)	Oxidation@8	120523_09_SE_1_3	55.029	259	285	27.8	0.017	2
1012.84	3	0.01	(R)ELGVPIIMHDYLTGGFTANTSLAHYCR(D)		120523_09_SE_1_3	64.609	259	285	31.2	0.00033	2
594.391	2	0.055	(R)DNGLLLHIHR(A)		120523_09_SE_1_3	24.3544	286	295	20.6	1.6	5
499.91	3	0.0013	(R)MSGGDHIHSGTVVGK(L)	Oxidation@1	120523_09_SE_1_3	9.35052	320	334	24.3	0.1	5
615.952	3	-0.055	(K)LEGERDITLGFVDLLR(D)		120523_09_SE_1_3	66.0223	335	350	33.5	0.0093	5
631.299	2	-0.062	(R)DITLGFVDLLR(D)		120523_09_SE_1_3	72.1284	340	350	40.7	0.0021	5
976.09	2	0.06	(R)DITLGFVDLLRDDFIAK(D)		120523_09_SE_1_3	82.156	340	356	48.2	4.9e-06	5
558.785	2	-0.01	(R)VALEACVQAR(N)		120523_09_SE_1_3	16.7038	422	431	37.2	0.0031	2
571.796	2	-0.015	(R)DLAAEGNAIIR(E)		120523_09_SE_1_3	27.7476	436	446	40	0.023	4
773.892	2	0.021	(K)WSPELAAACEVWK(E)		120523_09_SE_1_3	48.7308	451	463	42.7	2.8e-06	5
470.806	2	0.045	(K)EIKFEFK(A)		120523_09_SE_1_3	26.9893	464	470	21.5	0.75	6
737.334	2	-0.023	(K)AVDTLDDPKDEQK(-)		120523_09_SE_1_3	10.3695	471	483	18.6	1.3	2
2 Acc. #: 168 Species: UNREADABLE Name: gi|1092181941|gb|AOY41459.1| ATP synthase CF1 alpha subunit (chloroplast) [Haberlea rhodopensis]
Version: 1
Protein MW: 55354.6 Protein pI: 5.2 Protein Length: 507 Index: 168
Num Unique	% Cov	Best Disc Score	Best Expect Val
13	34.1	3.75	7e-06
m/z	z	Da	DB Peptide	Variable Mods	Fraction	RT	Start	End	Score	Expect	# in DB
807.044	2	0.089	(K)IVNTGTVLQVGDGIAR(I)		120523_09_SE_1_3	38.191	26	41	32.1	0.0033	4
708.855	2	-0.041	(R)IAQIPVSEAYLGR(V)		120523_09_SE_1_3	36.2781	95	107	45	3e-05	5
626.849	2	-0.018	(R)LIESPAPGIISR(R)		120523_09_SE_1_3	28.7006	129	140	35.1	0.00011	5
815.686	3	-0.091	(R)RSVYEPLQTGLIAIDSMIPIGR(G)	Oxidation@17	120523_09_SE_1_3	63.8378	141	162	28.1	0.0034	5
1145.19	2	0.077	(R)SVYEPLQTGLIAIDSMIPIGR(G)	Oxidation@16	120523_09_SE_1_3	69.3592	142	162	45.5	7e-06	5
1137.11	2	-0.0027	(R)SVYEPLQTGLIAIDSMIPIGR(G)		120523_09_SE_1_3	85.2129	142	162	40.4	0.0003	5
751.379	2	-0.024	(K)ASSVAQVVNTLQER(G)		120523_09_SE_1_3	36.2385	203	216	39.2	0.0048	5
659.408	2	0.052	(K)HTLIIYDDLSK(Q)		120523_09_SE_1_3	32.4804	256	266	35.2	0.00036	5
438.761	2	0.0084	(R)QMSLLLR(R)	Oxidation@2	120523_09_SE_1_3	19.7146	273	279	16	6.1	13
777.432	2	0.059	(R)EAYPGDVFYLHSR(L)		120523_09_SE_1_3	34.7047	285	297	33.3	0.00031	5
1219.88	3	-0.061	(K)QSQSAPLTVEEQIMTIYTGTNGYLDSLEIGQVR(K)	Oxidation@14	120523_09_SE_1_3	79.4804	423	455	25.9	0.031	2
452.851	2	0.066	(R)KFLVELR(T)		120523_09_SE_1_3	27.6473	456	462	17.8	3.5	5
952.499	3	0.35	(K)TNKPQFQEIISSTETFTEEAEALLK(E)		120523_09_SE_1_3	85.1558	467	491	30.9	0.0046	2
3 Acc. #: 11844 Species: UNREADABLE Name: gi|1024044281|gb|KZV47223.1| citrate synthase, mitochondrial [Dorcoceras hygrometricum]
Version: 1
Protein MW: 54380.4 Protein pI: 8.5 Protein Length: 488 Index: 11844
Num Unique	% Cov	Best Disc Score	Best Expect Val
9	27	3.39	4.6e-05
m/z	z	Da	DB Peptide	Variable Mods	Fraction	RT	Start	End	Score	Expect	# in DB
867.862	2	-0.085	(K)VQLGNITVDMVIGGMR(G)	Oxidation@10;Oxidation@15	120523_09_SE_1_3	47.842	82	97	44.1	7e-05	1
859.928	2	-0.022	(K)VQLGNITVDMVIGGMR(G)	Oxidation@15=27	120523_09_SE_1_3	57.7109	82	97	31.4	0.0006	1
1067.05	2	0.018	(R)GMTGLLWETSLLDPEEGIR(F)	Oxidation@2	120523_09_SE_1_3	66.3036	98	116	45	4.6e-05	2
1058.98	2	-0.049	(R)GMTGLLWETSLLDPEEGIR(F)		120523_09_SE_1_3	72.171	98	116	31.7	0.0018	2
903.623	4	0.2	(K)KGEVIPGDDSLDYGGNFAHMLGFDDPAMLELMR(L)		120523_09_SE_1_3	90.8342	247	279	15.6	7.5	1
569.321	2	-0.0093	(K)VVPGFGHGVLR(K)		120523_09_SE_1_3	25.5588	364	374	21.5	0.0035	2
998.558	2	-0.032	(K)LVSNLYEVVPPILLELGK(V)		120523_09_SE_1_3	84.0322	399	416	31.2	0.0016	1
697.633	4	0.019	(K)VKNPWPNVDAHSGVLLNHYGLTEAR(Y)		120523_09_SE_1_3	43.2846	417	441	28.4	0.17	2
534.145	2	-0.19	(R)ALGLALERPK(S)		120523_09_SE_1_3	23.226	464	473	27.4	0.2	1
4 Acc. #: 11723 Species: UNREADABLE Name: gi|1024044403|gb|KZV47344.1| transketolase [Dorcoceras hygrometricum]
Version: 1
Protein MW: 80436.7 Protein pI: 6.1 Protein Length: 742 Index: 11723
Num Unique	% Cov	Best Disc Score	Best Expect Val
5	8.1	4.71	1.2e-06
m/z	z	Da	DB Peptide	Variable Mods	Fraction	RT	Start	End	Score	Expect	# in DB
700.869	2	-0.0062	(K)SIITGELPAGWEK(A)		120523_09_SE_1_3	42.8233	408	420	39.3	0.0046	2
657.384	2	0.021	(R)NLSQQNLNALAK(V)		120523_09_SE_1_3	21.8967	436	447	35.5	0.0055	2
1037.02	2	-0.042	(K)VLPGLLGGSADLASSNMTLLK(M)	Oxidation@17	120523_09_SE_1_3	55.6158	448	468	52.2	1.2e-06	2
1029.03	2	-0.037	(K)VLPGLLGGSADLASSNMTLLK(M)		120523_09_SE_1_3	63.1639	448	468	48.4	7.2e-06	2
721.403	2	0.0044	(K)LAQLPGTSIEGVEK(G)		120523_09_SE_1_3	30.3181	602	615	46.9	0.00012	1
4-1 Acc. #: 12881 Species: UNREADABLE Name: gi|1024042852|gb|KZV46186.1| transketolase, chloroplastic [Dorcoceras hygrometricum]
Version: 1
Protein MW: 79963.3 Protein pI: 6.3 Protein Length: 743 Index: 12881
Num Unique	% Cov	Best Disc Score	Best Expect Val
5	8.2	4.71	1.2e-06
m/z	z	Da	DB Peptide	Variable Mods	Fraction	RT	Start	End	Score	Expect	# in DB
700.869	2	-0.0062	(K)SIITGELPAGWEK(A)		120523_09_SE_1_3	42.8233	409	421	39.3	0.0046	2
795.371	2	-0.023	(K)ALPTYTPETPGDATR(N)		120523_09_SE_1_3	22.6079	422	436	29.9	0.035	1
657.384	2	0.021	(R)NLSQQNLNALAK(V)		120523_09_SE_1_3	21.8967	437	448	35.5	0.0055	2
1037.02	2	-0.042	(K)VLPGLLGGSADLASSNMTLLK(M)	Oxidation@17	120523_09_SE_1_3	55.6158	449	469	52.2	1.2e-06	2
1029.03	2	-0.037	(K)VLPGLLGGSADLASSNMTLLK(M)		120523_09_SE_1_3	63.1639	449	469	48.4	7.2e-06	2
5 Acc. #: 22737 Species: UNREADABLE Name: gi|1024017033|gb|KZV36330.1| heat shock cognate 70 kDa protein 2-like [Dorcoceras hygrometricum]
Version: 1
Protein MW: 70962.0 Protein pI: 5.1 Protein Length: 647 Index: 22737
Num Unique	% Cov	Best Disc Score	Best Expect Val
6	13.3	3.32	4.9e-05
m/z	z	Da	DB Peptide	Variable Mods	Fraction	RT	Start	End	Score	Expect	# in DB
737.307	2	-0.039	(R)TTPSYVGFTDTER(L)		120523_09_SE_1_3	24.1847	40	52	28.2	0.00048	2
839.395	2	-0.022	(K)NQVAMNPINTVFDAK(R)	Oxidation@5	120523_09_SE_1_3	39.77	60	74	37.8	0.00013	1
840.875	2	-0.046	(K)NAVVTVPAYFNDSQR(Q)		120523_09_SE_1_3	36.653	145	159	29.5	0.0018	3
830.427	2	-0.024	(R)IINEPTAAAIAYGLDK(K)		120523_09_SE_1_3	43.5165	176	191	44.4	4.9e-05	7
894.476	2	-0.023	(R)IINEPTAAAIAYGLDKK(A)		120523_09_SE_1_3	38.8534	176	192	29.6	0.00053	7
858.642	3	-0.12	(K)SINPDEAVAYGAAVQAAILSGEGNEK(V)		120523_09_SE_1_3	63.5511	368	393	20.3	0.46	3
5-1 Acc. #: 10829 Species: UNREADABLE Name: gi|1024046407|gb|KZV48238.1| luminal-binding protein 5-like [Dorcoceras hygrometricum]
Version: 1
Protein MW: 73562.9 Protein pI: 5.0 Protein Length: 664 Index: 10829
Num Unique	% Cov	Best Disc Score	Best Expect Val
4	7.2	3.58	9.8e-06
m/z	z	Da	DB Peptide	Variable Mods	Fraction	RT	Start	End	Score	Expect	# in DB
732.85	2	-0.01	(R)ITPSWVGFTDGER(L)		120523_09_SE_1_3	40.9735	69	81	23.4	0.15	1
830.427	2	-0.024	(R)IINEPTAAAIAYGLDK(K)		120523_09_SE_1_3	43.5165	205	220	44.4	4.9e-05	7
894.476	2	-0.023	(R)IINEPTAAAIAYGLDKK(G)		120523_09_SE_1_3	38.8534	205	221	29.6	0.00053	7
1026.99	2	-0.019	(R)VEIESLFDGVDFSEPLTR(A)		120523_09_SE_1_3	68.7118	314	331	40.2	9.8e-06	2
5-2 Acc. #: 41860 Species: UNREADABLE Name: gi|1023970679|gb|KZV17207.1| luminal-binding protein 5-like [Dorcoceras hygrometricum]
Version: 1
Protein MW: 73824.3 Protein pI: 5.1 Protein Length: 666 Index: 41860
Num Unique	% Cov	Best Disc Score	Best Expect Val
3	5.3	3.32	4.9e-05
m/z	z	Da	DB Peptide	Variable Mods	Fraction	RT	Start	End	Score	Expect	# in DB
830.427	2	-0.024	(R)IINEPTAAAIAYGLDK(K)		120523_09_SE_1_3	43.5165	205	220	44.4	4.9e-05	7
894.476	2	-0.023	(R)IINEPTAAAIAYGLDKK(G)		120523_09_SE_1_3	38.8534	205	221	29.6	0.00053	7
1033.89	2	-0.13	(R)VEIESLFDGIDFSEPLTR(A)		120523_09_SE_1_3	72.419	314	331	29.2	0.00093	1
6 Acc. #: 10425 Species: UNREADABLE Name: gi|1024047173|gb|KZV48642.1| heat shock protein [Dorcoceras hygrometricum]
Version: 1
Protein MW: 74992.3 Protein pI: 5.3 Protein Length: 703 Index: 10425
Num Unique	% Cov	Best Disc Score	Best Expect Val
4	10.2	4.83	8.2e-07
m/z	z	Da	DB Peptide	Variable Mods	Fraction	RT	Start	End	Score	Expect	# in DB
862.432	2	-0.016	(R)IINEPTAASLAYGFEK(K)		120523_09_SE_1_3	43.6983	233	248	52.8	8.2e-07	2
917.398	3	-0.083	(K)AKMELSSLTQTNISLPFITATADGPK(H)	Oxidation@3	120523_09_SE_1_3	59.567	329	354	31.6	0.019	1
798.407	2	0.016	(R)AKFEELCSDLLDR(L)		120523_09_SE_1_3	39.539	363	375	15.4	2.6	2
904.416	2	-0.059	(K)LSFSDLDEVILVGGSTR(I)		120523_09_SE_1_3	64.8864	389	405	30	0.0021	2
6-1 Acc. #: 36363 Species: UNREADABLE Name: gi|1023984447|gb|KZV22704.1| stromal 70 kDa heat shock-related protein, chloroplastic [Dorcoceras hygrometricum]
Version: 1
Protein MW: 73922.1 Protein pI: 5.4 Protein Length: 692 Index: 36363
Num Unique	% Cov	Best Disc Score	Best Expect Val
4	8.7	4.83	8.2e-07
m/z	z	Da	DB Peptide	Variable Mods	Fraction	RT	Start	End	Score	Expect	# in DB
789.885	2	-0.032	(R)QAVVNPQNTFFSVK(R)		120523_09_SE_1_3	40.0763	120	133	32.7	0.032	1
862.432	2	-0.016	(R)IINEPTAASLAYGFEK(K)		120523_09_SE_1_3	43.6983	231	246	52.8	8.2e-07	2
798.407	2	0.016	(R)AKFEELCSDLLDR(L)		120523_09_SE_1_3	39.539	352	364	15.4	2.6	2
904.416	2	-0.059	(K)LSFSDIDEVILVGGSTR(I)		120523_09_SE_1_3	64.8864	378	394	30	0.0021	2
7 Acc. #: 19725 Species: UNREADABLE Name: gi|1024024940|gb|KZV39342.1| V-type proton ATPase subunit B 2 [Dorcoceras hygrometricum]
Version: 1
Protein MW: 54274.2 Protein pI: 5.0 Protein Length: 488 Index: 19725
Num Unique	% Cov	Best Disc Score	Best Expect Val
4	16.2	3.55	2.2e-05
m/z	z	Da	DB Peptide	Variable Mods	Fraction	RT	Start	End	Score	Expect	# in DB
782.452	2	0.047	(K)AVVQVFEGTSGIDNK(Y)		120523_09_SE_1_3	32.0284	68	82	45.4	2.2e-05	2
1152.23	3	-0.022	(R)IFNGSGKPIDNGPPILPEAYLDISGSSINPSER(T)		120523_09_SE_1_3	60.2894	105	137	20.2	0.31	2
858.45	2	-0.02	(R)VTLFLNLANDPTIER(I)		120523_09_SE_1_3	56.0827	235	249	35.6	0.0049	1
964.89	2	-0.05	(R)GYPGYMYTDLATIYER(A)	Oxidation@6	120523_09_SE_1_3	46.7943	300	315	31.6	0.00058	2
8 Acc. #: 37948 Species: UNREADABLE Name: gi|1023981319|gb|KZV21119.1| enolase [Dorcoceras hygrometricum]
Version: 1
Protein MW: 47614.5 Protein pI: 5.7 Protein Length: 444 Index: 37948
Num Unique	% Cov	Best Disc Score	Best Expect Val
3	11.3	3.3	3.3e-05
m/z	z	Da	DB Peptide	Variable Mods	Fraction	RT	Start	End	Score	Expect	# in DB
903.013	2	0.038	(R)AAVPSGASTGIYEALELR(D)		120523_09_SE_1_3	50.6069	35	52	41.5	3.3e-05	2
943.02	2	0.037	(K)LAMQEFMILPVGAASFK(E)	Oxidation@3;Oxidation@7	120523_09_SE_1_3	55.5614	168	184	34.2	0.00022	1
787.401	2	-0.024	(K)VNQIGSVTESIEAVK(M)		120523_09_SE_1_3	36.7397	353	367	43.6	6.4e-05	1
9 Acc. #: 32947 Species: UNREADABLE Name: gi|1023992205|gb|KZV26120.1| ribulose bisphosphate carboxylase/oxygenase activase, chloroplastic [Dorcoceras hygrometricum]
Version: 1
Protein MW: 53876.2 Protein pI: 7.5 Protein Length: 490 Index: 32947
Num Unique	% Cov	Best Disc Score	Best Expect Val
3	9.6	3.97	1.9e-06
m/z	z	Da	DB Peptide	Variable Mods	Fraction	RT	Start	End	Score	Expect	# in DB
1045.08	2	-0.0093	(R)VPIIVTGNDFSTLYAPLIR(D)		120523_09_SE_1_3	68.653	294	312	45.6	1.9e-06	1
1013.04	3	0.18	(R)TDNVSPEAVIKLVDTFPGQSIDFFGALR(A)		120523_09_SE_1_3	103.074	338	365	31.8	0.0056	1
941.934	2	-0.054	(K)LVDTFPGQSIDFFGALR(A)		120523_09_SE_1_3	69.122	349	365	33.4	0.0024	1
10 Acc. #: 40166 Species: UNREADABLE Name: gi|1023975117|gb|KZV18901.1| hypothetical protein F511_12006 [Dorcoceras hygrometricum]
Version: 1
Protein MW: 46966.2 Protein pI: 5.6 Protein Length: 413 Index: 40166
Num Unique	% Cov	Best Disc Score	Best Expect Val
4	13.6	2.64	0.00072
m/z	z	Da	DB Peptide	Variable Mods	Fraction	RT	Start	End	Score	Expect	# in DB
701.154	2	-0.22	(K)GLDVIQQAQSGTGK(T)		120523_09_SE_1_3	21.6749	77	90	42.1	0.00072	3
908.454	4	0.22	(K)DQIYDIFQLLPPKVQIGVFSATMPPEALEITR(K)		120523_09_SE_1_3	44.5727	201	232	16	2.3	1
1038.05	2	0.0082	(K)VQIGVFSATMPPEALEITR(K)	Oxidation@10	120523_09_SE_1_3	53.1763	214	232	26.5	0.0012	1
587.355	2	0.028	(K)RDELTLEGIK(Q)		120523_09_SE_1_3	25.1454	245	254	23.4	0.42	4
10-1 Acc. #: 7207 Species: UNREADABLE Name: gi|1024052655|gb|KZV51860.1| eukaryotic initiation factor 4A-15-like [Dorcoceras hygrometricum]
Version: 1
Protein MW: 46901.1 Protein pI: 5.3 Protein Length: 413 Index: 7207
Num Unique	% Cov	Best Disc Score	Best Expect Val
3	10.4	2.64	0.00072
m/z	z	Da	DB Peptide	Variable Mods	Fraction	RT	Start	End	Score	Expect	# in DB
701.154	2	-0.22	(K)GLDVIQQAQSGTGK(T)		120523_09_SE_1_3	21.6749	77	90	42.1	0.00072	3
1038.05	2	0.0082	(K)IQVGVFSATMPPEALEITR(K)	Oxidation@10	120523_09_SE_1_3	53.1763	214	232	26.5	0.0012	2
587.355	2	0.028	(K)RDELTLEGIK(Q)		120523_09_SE_1_3	25.1454	245	254	23.4	0.42	4
11 Acc. #: 32915 Species: UNREADABLE Name: gi|1023992247|gb|KZV26152.1| hypothetical protein F511_06319 [Dorcoceras hygrometricum]
Version: 1
Protein MW: 45170.7 Protein pI: 10.3 Protein Length: 410 Index: 32915
Num Unique	% Cov	Best Disc Score	Best Expect Val
2	7.1	4.42	5.3e-07
m/z	z	Da	DB Peptide	Variable Mods	Fraction	RT	Start	End	Score	Expect	# in DB
666.899	2	0.019	(R)KGPLIVYGTEGAK(L)		120523_09_SE_1_3	18.0279	214	226	20.9	0.021	1
965.405	2	-0.0016	(K)TMISDSDYTEFENFSK(W)	Oxidation@2	120523_09_SE_1_3	38.6434	389	404	47.9	5.3e-07	1
12 Acc. #: 24314 Species: UNREADABLE Name: gi|1024013872|gb|KZV34753.1| hypothetical protein F511_00655 [Dorcoceras hygrometricum]
Version: 1
Protein MW: 51929.2 Protein pI: 6.4 Protein Length: 477 Index: 24314
Num Unique	% Cov	Best Disc Score	Best Expect Val
4	14.3	2.54	0.00014
m/z	z	Da	DB Peptide	Variable Mods	Fraction	RT	Start	End	Score	Expect	# in DB
739.289	2	0.4	(-)MASISAAAVPSTAATK(L)		120523_09_SE_1_3	31.9703	1	16	15.5	1	1
967.495	2	-0.022	(K)TTLTAALTMALASVGNSAPK(K)	Oxidation@9	120523_09_SE_1_3	70.7527	94	113	21.7	0.077	1
899.376	2	-0.071	(R)GITINTATVEYETETR(H)		120523_09_SE_1_3	34.4692	128	143	38.4	0.00014	1
845.415	2	-0.013	(K)TLDDAMAGDNVGLLLR(G)	Oxidation@6	120523_09_SE_1_3	43.3845	343	358	30.4	0.0064	1
13 Acc. #: 33566 Species: UNREADABLE Name: gi|1023991379|gb|KZV25501.1| UDP-D-apiose/UDP-D-xylose synthase 2 [Dorcoceras hygrometricum]
Version: 1
Protein MW: 43535.2 Protein pI: 5.5 Protein Length: 390 Index: 33566
Num Unique	% Cov	Best Disc Score	Best Expect Val
6	33.1	2.04	0.0002
m/z	z	Da	DB Peptide	Variable Mods	Fraction	RT	Start	End	Score	Expect	# in DB
916.098	4	-0.36	(-)MASGRLDLDGNLIKPMTICMIGAGGFIGSHLCEK(L)		120523_09_SE_1_3	84.4047	1	34	21.8	0.18	1
871.537	4	-0.43	(K)QLIERLIYAEGAENGLEFTIVRPFNWIGPR(M)	Gln->pyro-Glu@1	120523_09_SE_1_3	91.9771	191	220	15.9	19	1
851.88	2	-0.029	(R)MDFIPGIDGPSEGVPR(V)	Oxidation@1	120523_09_SE_1_3	40.3637	221	236	33.9	0.0002	4
844.026	2	0.085	(K)DAIEAVLLMIENPSR(A)	Oxidation@9	120523_09_SE_1_3	69.3016	268	282	26.5	0.019	1
972.181	2	0.19	(R)ANGQIFNVGNPNNEVTVR(Q)		120523_09_SE_1_3	34.7485	283	300	29.3	0.0062	4
654.993	3	-0.0094	(K)TSLWDLLESTLTYQHR(T)		120523_09_SE_1_3	80.8296	359	374	22.4	0.24	3
13-1 Acc. #: 29651 Species: UNREADABLE Name: gi|1024000501|gb|KZV29416.1| UDP-D-apiose/UDP-D-xylose synthase 2-like [Dorcoceras hygrometricum]
Version: 1
Protein MW: 43629.4 Protein pI: 5.7 Protein Length: 390 Index: 29651
Num Unique	% Cov	Best Disc Score	Best Expect Val
4	15.9	2.04	0.0002
m/z	z	Da	DB Peptide	Variable Mods	Fraction	RT	Start	End	Score	Expect	# in DB
851.88	2	-0.029	(R)MDFIPGIDGPSEGVPR(V)	Oxidation@1	120523_09_SE_1_3	40.3637	221	236	33.9	0.0002	4
972.181	2	0.19	(R)ANGQIFNVGNPNNEVTVR(Q)		120523_09_SE_1_3	34.7485	283	300	29.3	0.0062	4
730.724	2	-0.12	(R)QLAEMMTQVYSK(V)	Oxidation@5;Oxidation@6	120523_09_SE_1_3	11.713	301	312	25.2	0.018	2
654.993	3	-0.0094	(K)TSLWDLLESTLTYQHR(T)		120523_09_SE_1_3	80.8296	359	374	22.4	0.24	3
13-2 Acc. #: 41002 Species: UNREADABLE Name: gi|1023973923|gb|KZV18065.1| UDP-D-apiose/UDP-D-xylose synthase 2-like [Dorcoceras hygrometricum]
Version: 1
Protein MW: 43725.5 Protein pI: 5.3 Protein Length: 390 Index: 41002
Num Unique	% Cov	Best Disc Score	Best Expect Val
3	11.8	2.04	0.0002
m/z	z	Da	DB Peptide	Variable Mods	Fraction	RT	Start	End	Score	Expect	# in DB
851.88	2	-0.029	(R)MDFIPGIDGPSEGVPR(V)	Oxidation@1	120523_09_SE_1_3	40.3637	221	236	33.9	0.0002	4
972.181	2	0.19	(R)ANGQIFNVGNPNNEVTVR(Q)		120523_09_SE_1_3	34.7485	283	300	29.3	0.0062	4
730.724	2	-0.12	(R)QLAEMMTQVYSK(V)	Oxidation@5;Oxidation@6	120523_09_SE_1_3	11.713	301	312	25.2	0.018	2
14 Acc. #: 37564 Species: UNREADABLE Name: gi|1023981831|gb|KZV21503.1| chaperonin 60 subunit beta 2, chloroplastic [Dorcoceras hygrometricum]
Version: 1
Protein MW: 64131.9 Protein pI: 5.7 Protein Length: 604 Index: 37564
Num Unique	% Cov	Best Disc Score	Best Expect Val
3	8.4	3.1	2.3e-05
m/z	z	Da	DB Peptide	Variable Mods	Fraction	RT	Start	End	Score	Expect	# in DB
771.347	2	-0.041	(R)EVELEDPVENIGAK(L)		120523_09_SE_1_3	35.5329	118	131	20.6	0.089	2
640.867	2	-0.02	(K)VVAAGANPVLITR(G)		120523_09_SE_1_3	25.0456	165	177	41	2.3e-05	2
844.397	3	-0.061	(R)GGYSILIVAEDIEQEALGTLVVNK(L)		120523_09_SE_1_3	102.985	301	324	25.1	0.048	1
15 Acc. #: 22843 Species: UNREADABLE Name: gi|1024016905|gb|KZV36224.1| heat shock cognate protein 80-like [Dorcoceras hygrometricum]
Version: 1
Protein MW: 79897.5 Protein pI: 5.0 Protein Length: 699 Index: 22843
Num Unique	% Cov	Best Disc Score	Best Expect Val
4	8.9	2.17	0.0033
m/z	z	Da	DB Peptide	Variable Mods	Fraction	RT	Start	End	Score	Expect	# in DB
628.852	2	5.9e-05	(K)ADLVNNLGTIAR(S)		120523_09_SE_1_3	34.2092	88	99	39.9	0.0033	3
917.674	2	-0.3	(K)HSEFISYPISLWVEK(T)		120523_09_SE_1_3	59.7676	198	212	16.2	1.9	1
764.405	2	0.00043	(K)GIVDSEDLPLNISR(E)		120523_09_SE_1_3	43.5707	358	371	36.1	0.006	2
807.831	3	0.42	(K)KGYEVLYMVDAIDEYAVGQLK(D)	Oxidation@8	120523_09_SE_1_3	38.5436	485	505	17.1	1	4
15-1 Acc. #: 7891 Species: UNREADABLE Name: gi|1024051578|gb|KZV51176.1| hypothetical protein F511_19852 [Dorcoceras hygrometricum]
Version: 1
Protein MW: 61625.5 Protein pI: 5.7 Protein Length: 546 Index: 7891
Num Unique	% Cov	Best Disc Score	Best Expect Val
3	10.6	2.17	0.0033
m/z	z	Da	DB Peptide	Variable Mods	Fraction	RT	Start	End	Score	Expect	# in DB
628.852	2	5.9e-05	(K)ADLVNNLGTIAR(S)		120523_09_SE_1_3	34.2092	213	224	39.9	0.0033	3
742.36	4	-0.2	(K)EISDDEDDELEKEEEGDIEEVDEEK(E)		120523_09_SE_1_3	42.3099	305	329	16.3	3.3	1
807.831	3	0.42	(K)KGYEVIYMVDAIDEYAVGQLK(E)	Oxidation@8	120523_09_SE_1_3	38.5436	477	497	17.1	1	4
16 Acc. #: 38979 Species: UNREADABLE Name: gi|1023977901|gb|KZV20088.1| peroxidase 12 [Dorcoceras hygrometricum]
Version: 1
Protein MW: 38257.5 Protein pI: 6.9 Protein Length: 351 Index: 38979
Num Unique	% Cov	Best Disc Score	Best Expect Val
3	10.3	2.59	0.0001
m/z	z	Da	DB Peptide	Variable Mods	Fraction	RT	Start	End	Score	Expect	# in DB
687.874	2	6.1e-05	(R)VVSCSDILALAAR(D)		120523_09_SE_1_3	44.9944	128	140	38.3	0.00025	1
528.26	2	-0.019	(K)YYVDLLNR(Q)		120523_09_SE_1_3	35.4904	261	268	23.1	0.072	1
873.435	2	0.033	(R)QGLFTSDQDLYTDSR(T)		120523_09_SE_1_3	35.4509	269	283	38	0.0001	1
17 Acc. #: 27696 Species: UNREADABLE Name: gi|1024005291|gb|KZV31371.1| gamma aminobutyrate transaminase 1, mitochondrial-like [Dorcoceras hygrometricum]
Version: 1
Protein MW: 68228.4 Protein pI: 5.1 Protein Length: 612 Index: 27696
Num Unique	% Cov	Best Disc Score	Best Expect Val
2	4.4	2.96	3.3e-05
m/z	z	Da	DB Peptide	Variable Mods	Fraction	RT	Start	End	Score	Expect	# in DB
865.401	2	-0.0037	(K)VFFTNSGSEANDSQVK(L)		120523_09_SE_1_3	20.8593	98	113	40.2	3.3e-05	2
627.88	2	0.0059	(R)LANNLENLIIK(E)		120523_09_SE_1_3	46.0177	189	199	32.7	0.038	2
18 Acc. #: 34458 Species: UNREADABLE Name: gi|1023989006|gb|KZV24609.1| hypothetical protein F511_06435 [Dorcoceras hygrometricum]
Version: 1
Protein MW: 55683.9 Protein pI: 8.4 Protein Length: 491 Index: 34458
Num Unique	% Cov	Best Disc Score	Best Expect Val
2	10.8	3.54	2.6e-06
m/z	z	Da	DB Peptide	Variable Mods	Fraction	RT	Start	End	Score	Expect	# in DB
1065.52	2	-0.026	(K)EIFTYGGISSPADFFPLLR(W)		120523_09_SE_1_3	81.6259	207	225	41.8	2.6e-06	2
930.539	4	0.55	(K)IIKGIMMVMLLAGTDTSSVTIEWAMSALLNHPEK(L)	Oxidation@6|7	120523_09_SE_1_3	91.6958	282	315	17.9	9.5	2
19 Acc. #: 8162 Species: UNREADABLE Name: gi|1024050945|gb|KZV50905.1| hypothetical protein F511_10476 [Dorcoceras hygrometricum]
Version: 1
Protein MW: 122954.7 Protein pI: 5.8 Protein Length: 1095 Index: 8162
Num Unique	% Cov	Best Disc Score	Best Expect Val
2	3	2.28	0.00072
m/z	z	Da	DB Peptide	Variable Mods	Fraction	RT	Start	End	Score	Expect	# in DB
1000.38	2	0.35	(K)VPVLETPDGAIFESNAIAR(Y)		120523_09_SE_1_3	49.8582	758	776	38.4	0.00072	1
822.403	2	0.0036	(K)YNDENTVSFVTLNK(V)		120523_09_SE_1_3	34.0862	989	1002	29.6	0.0013	2
20 Acc. #: 38747 Species: UNREADABLE Name: gi|1023978896|gb|KZV20320.1| V-type proton ATPase subunit H [Dorcoceras hygrometricum]
Version: 1
Protein MW: 52865.9 Protein pI: 8.8 Protein Length: 466 Index: 38747
Num Unique	% Cov	Best Disc Score	Best Expect Val
2	7.9	2.45	0.00037
m/z	z	Da	DB Peptide	Variable Mods	Fraction	RT	Start	End	Score	Expect	# in DB
937.187	3	0.03	(R)DIFKEETVEYVLALIDEMLLANPK(R)	Oxidation@18	120523_09_SE_1_3	93.3558	46	69	20.2	0.37	1
722.401	2	-0.0052	(R)VLITILDTSTDPR(T)		120523_09_SE_1_3	45.604	388	400	39	0.00037	1
21 Acc. #: 6655 Species: UNREADABLE Name: gi|1024053701|gb|KZV52412.1| catalase isozyme 1, partial [Dorcoceras hygrometricum]
Version: 1
Protein MW: 56636.5 Protein pI: 6.6 Protein Length: 488 Index: 6655
Num Unique	% Cov	Best Disc Score	Best Expect Val
2	5.7	1.96	0.00038
m/z	z	Da	DB Peptide	Variable Mods	Fraction	RT	Start	End	Score	Expect	# in DB
810.897	2	-0.044	(K)TWPEDILPLQPVGR(M)		120523_09_SE_1_3	57.8112	288	301	29.3	0.0089	1
762.666	2	0.23	(R)LGPNYLQLPVNAPK(C)		120523_09_SE_1_3	43.8387	352	365	34.2	0.00038	1
22 Acc. #: 22627 Species: UNREADABLE Name: gi|1024017190|gb|KZV36440.1| hypothetical protein F511_15945 [Dorcoceras hygrometricum]
Version: 1
Protein MW: 72765.8 Protein pI: 5.0 Protein Length: 659 Index: 22627
Num Unique	% Cov	Best Disc Score	Best Expect Val
1	2.7	3.16	9.8e-06
m/z	z	Da	DB Peptide	Variable Mods	Fraction	RT	Start	End	Score	Expect	# in DB
1026.99	2	-0.019	(R)VEIESLFDGVDFSEPLTR(A)		120523_09_SE_1_3	68.7118	316	333	40.2	9.8e-06	2
23 Acc. #: 19152 Species: UNREADABLE Name: gi|1024026364|gb|KZV39915.1| ruBisCO large subunit-binding protein subunit alpha [Dorcoceras hygrometricum]
Version: 1
Protein MW: 62638.1 Protein pI: 5.1 Protein Length: 595 Index: 19152
Num Unique	% Cov	Best Disc Score	Best Expect Val
2	4.2	1.7	0.001
m/z	z	Da	DB Peptide	Variable Mods	Fraction	RT	Start	End	Score	Expect	# in DB
740.234	2	-0.14	(R)GYISPQFVTNPEK(L)		120523_09_SE_1_3	30.5795	245	257	33.3	0.001	1
645.823	2	0.01	(K)VGAATETELEDR(K)		120523_09_SE_1_3	12.9393	428	439	25.6	0.007	1
24 Acc. #: 29321 Species: UNREADABLE Name: gi|1024000882|gb|KZV29746.1| polyphenol oxidase, chloroplastic-like [Dorcoceras hygrometricum]
Version: 1
Protein MW: 65408.8 Protein pI: 8.2 Protein Length: 578 Index: 29321
Num Unique	% Cov	Best Disc Score	Best Expect Val
2	5.7	2.31	0.001
m/z	z	Da	DB Peptide	Variable Mods	Fraction	RT	Start	End	Score	Expect	# in DB
439.978	4	-0.26	(-)MATVPVSWSTHLPQHR(R)	Met-loss+Acetyl@1	120523_09_SE_1_3	34.1268	1	16	18.6	16	1
1027.97	2	0.5	(K)FDVFINDEDDKPDELDK(A)		120523_09_SE_1_3	45.3815	498	514	39.4	0.001	1
25 Acc. #: 22631 Species: UNREADABLE Name: gi|1024017177|gb|KZV36436.1| methionine synthase [Dorcoceras hygrometricum]
Version: 1
Protein MW: 84776.7 Protein pI: 6.0 Protein Length: 765 Index: 22631
Num Unique	% Cov	Best Disc Score	Best Expect Val
1	2.1	2.95	1e-05
m/z	z	Da	DB Peptide	Variable Mods	Fraction	RT	Start	End	Score	Expect	# in DB
903.933	2	-0.049	(K)GMLTGPVTILNWSFVR(N)	Oxidation@2	120523_09_SE_1_3	70.5224	556	571	38.1	1e-05	1
26 Acc. #: 40529 Species: UNREADABLE Name: gi|1023974503|gb|KZV18538.1| fructose-1,6-bisphosphatase, chloroplastic-like [Dorcoceras hygrometricum]
Version: 1
Protein MW: 44898.2 Protein pI: 5.1 Protein Length: 412 Index: 40529
Num Unique	% Cov	Best Disc Score	Best Expect Val
1	2.9	2.84	7.8e-05
m/z	z	Da	DB Peptide	Variable Mods	Fraction	RT	Start	End	Score	Expect	# in DB
686.863	2	-0.0038	(R)TLLYGGIYGYPR(D)		120523_09_SE_1_3	41.5822	335	346	40.4	7.8e-05	1
27 Acc. #: 167 Species: UNREADABLE Name: gi|1092181942|gb|AOY41460.1| ATP synthase CF1 beta subunit (chloroplast) [Haberlea rhodopensis]
Version: 1
Protein MW: 53852.3 Protein pI: 5.1 Protein Length: 498 Index: 167
Num Unique	% Cov	Best Disc Score	Best Expect Val
1	2.8	2.71	0.00047
m/z	z	Da	DB Peptide	Variable Mods	Fraction	RT	Start	End	Score	Expect	# in DB
717.369	2	-0.022	(R)FVQAGSEVSALLGR(M)		120523_09_SE_1_3	45.9176	278	291	42.1	0.00047	4
28 Acc. #: 7813 Species: UNREADABLE Name: gi|1024051708|gb|KZV51254.1| glucose-1-phosphate adenylyltransferase [Dorcoceras hygrometricum]
Version: 1
Protein MW: 57134.9 Protein pI: 7.1 Protein Length: 521 Index: 7813
Num Unique	% Cov	Best Disc Score	Best Expect Val
1	2.7	2.15	0.0012
m/z	z	Da	DB Peptide	Variable Mods	Fraction	RT	Start	End	Score	Expect	# in DB
813.41	2	-0.025	(K)IYVLTQFNSASLNR(H)		120523_09_SE_1_3	44.6728	144	157	38	0.0012	1
29 Acc. #: 23918 Species: UNREADABLE Name: gi|1024014334|gb|KZV35149.1| elongation factor 1-alpha [Dorcoceras hygrometricum]
Version: 1
Protein MW: 49486.7 Protein pI: 9.1 Protein Length: 449 Index: 23918
Num Unique	% Cov	Best Disc Score	Best Expect Val
1	2.4	0.98	0.0041
m/z	z	Da	DB Peptide	Variable Mods	Fraction	RT	Start	End	Score	Expect	# in DB
513.309	2	0.00063	(K)IGGIGTVPVGR(V)		120523_09_SE_1_3	22.2069	244	254	28.3	0.0041	5
30 Acc. #: 163 Species: UNREADABLE Name: gi|1092181946|gb|AOY41464.1| photosystem II CP43 chlorophyll apoprotein (chloroplast) [Haberlea rhodopensis]
Version: 1
Protein MW: 51910.3 Protein pI: 6.7 Protein Length: 473 Index: 163
Num Unique	% Cov	Best Disc Score	Best Expect Val
1	3.6	0.95	0.0031
m/z	z	Da	DB Peptide	Variable Mods	Fraction	RT	Start	End	Score	Expect	# in DB
939.157	2	0.096	(K)ITNLTLSPSIIFGFLLK(S)		120523_09_SE_1_3	94.795	199	215	27.6	0.0031	2
31 Acc. #: 31629 Species: UNREADABLE Name: gi|1023995885|gb|KZV27438.1| sucrose-phosphate synthase [Dorcoceras hygrometricum]
Version: 1
Protein MW: 118493.4 Protein pI: 6.1 Protein Length: 1053 Index: 31629
Num Unique	% Cov	Best Disc Score	Best Expect Val
1	2.8	0.78	0.0033
m/z	z	Da	DB Peptide	Variable Mods	Fraction	RT	Start	End	Score	Expect	# in DB
1036.2	3	-0.049	(K)GVFINPAFIEPFGLTLIEAAAHGLPIVATK(N)		120523_09_SE_1_3	104.971	568	597	26	0.0033	1
32 Acc. #: 11103 Species: UNREADABLE Name: gi|1024045800|gb|KZV47964.1| Ankyrin repeat [Dorcoceras hygrometricum]
Version: 1
Protein MW: 82315.4 Protein pI: 7.0 Protein Length: 761 Index: 11103
Num Unique	% Cov	Best Disc Score	Best Expect Val
1	3.8	0.78	0.07
m/z	z	Da	DB Peptide	Variable Mods	Fraction	RT	Start	End	Score	Expect	# in DB
781.869	4	0.49	(K)KGIDIDEQDALGFSAVMIAAMEGHVDAFR(Q)	Oxidation@21=9	120523_09_SE_1_3	53.5561	478	506	31	0.07	2
33 Acc. #: 4625 Species: UNREADABLE Name: gi|1024057280|gb|KZV54442.1| polyphenol oxidase, chloroplastic-like [Dorcoceras hygrometricum]
Version: 1
Protein MW: 65201.2 Protein pI: 5.9 Protein Length: 587 Index: 4625
Num Unique	% Cov	Best Disc Score	Best Expect Val
2	4.8	0.49	0.014
m/z	z	Da	DB Peptide	Variable Mods	Fraction	RT	Start	End	Score	Expect	# in DB
799.172	2	-0.19	(R)QPSGEDLGNFYSAGR(D)		120523_09_SE_1_3	25.7464	337	351	25.4	0.014	2
716.895	2	0.012	(K)AAYIGTYAQIPHK(T)		120523_09_SE_1_3	24.0003	511	523	19.4	0.18	1
34 Acc. #: 10593 Species: UNREADABLE Name: gi|1024046979|gb|KZV48474.1| hypothetical protein F511_18280 [Dorcoceras hygrometricum]
Version: 1
Protein MW: 38983.1 Protein pI: 8.6 Protein Length: 349 Index: 10593
Num Unique	% Cov	Best Disc Score	Best Expect Val
1	10.6	0.42	0.15
m/z	z	Da	DB Peptide	Variable Mods	Fraction	RT	Start	End	Score	Expect	# in DB
976.751	4	0.51	(R)TSSLEAPIMLLSGHQSAIYTMKFNPAGTIIASGSHDR(D)		120523_09_SE_1_3	84.2421	37	73	28.7	0.15	1
35 Acc. #: 42509 Species: UNREADABLE Name: gi|1023969311|gb|KZV16558.1| scopoletin glucosyltransferase-like [Dorcoceras hygrometricum]
Version: 1
Protein MW: 20273.2 Protein pI: 5.4 Protein Length: 185 Index: 42509
Num Unique	% Cov	Best Disc Score	Best Expect Val
1	7	0.38	0.092
m/z	z	Da	DB Peptide	Variable Mods	Fraction	RT	Start	End	Score	Expect	# in DB
744.891	2	-0.012	(R)WAFIWVIQPGSGK(R)		120523_09_SE_1_3	67.8605	16	28	27.5	0.092	1
36 Acc. #: 42928 Species: UNREADABLE Name: gi|1023968372|gb|KZV16139.1| protein STRUBBELIG-receptor FAMILY 8 [Dorcoceras hygrometricum]
Version: 1
Protein MW: 77713.4 Protein pI: 7.0 Protein Length: 716 Index: 42928
Num Unique	% Cov	Best Disc Score	Best Expect Val
1	3.6	0.31	0.23
m/z	z	Da	DB Peptide	Variable Mods	Fraction	RT	Start	End	Score	Expect	# in DB
676.892	4	0.28	(R)AKPTATVSDLKPTAMGSMAVERLQGK(N)	Oxidation@15|18	120523_09_SE_1_3	12.8966	353	378	28.3	0.23	1
37 Acc. #: 1084 Species: UNREADABLE Name: gi|1024063167|gb|KZV57983.1| hypothetical protein F511_12472 [Dorcoceras hygrometricum]
Version: 1
Protein MW: 102756.1 Protein pI: 4.7 Protein Length: 929 Index: 1084
Num Unique	% Cov	Best Disc Score	Best Expect Val
1	2	0.29	0.1
m/z	z	Da	DB Peptide	Variable Mods	Fraction	RT	Start	End	Score	Expect	# in DB
734.004	3	0.29	(K)ETLNHIADQLSEVIAYINR(G)		120523_09_SE_1_3	35.407	859	877	26.7	0.1	1
38 Acc. #: 42609 Species: UNREADABLE Name: gi|1023969206|gb|KZV16458.1| hypothetical protein F511_10070 [Dorcoceras hygrometricum]
Version: 1
Protein MW: 53268.1 Protein pI: 6.1 Protein Length: 496 Index: 42609
Num Unique	% Cov	Best Disc Score	Best Expect Val
1	3	0.22	0.031
m/z	z	Da	DB Peptide	Variable Mods	Fraction	RT	Start	End	Score	Expect	# in DB
861.922	2	-0.06	(R)IAWEEPFGPVLPVIR(I)		120523_09_SE_1_3	69.6501	387	401	24.1	0.031	1
39 Acc. #: 30565 Species: UNREADABLE Name: gi|1023998067|gb|KZV28502.1| hypothetical protein F511_15582 [Dorcoceras hygrometricum]
Version: 1
Protein MW: 68111.4 Protein pI: 7.2 Protein Length: 607 Index: 30565
Num Unique	% Cov	Best Disc Score	Best Expect Val
1	3	0.2	0.36
m/z	z	Da	DB Peptide	Variable Mods	Fraction	RT	Start	End	Score	Expect	# in DB
475.002	4	-0.012	(R)RGVDLVGDLGIAVPCLSR(R)		120523_09_SE_1_3	28.7419	227	244	27.9	0.36	1
40 Acc. #: 35921 Species: UNREADABLE Name: gi|1023985162|gb|KZV23146.1| hypothetical protein F511_29011 [Dorcoceras hygrometricum]
Version: 1
Protein MW: 29794.4 Protein pI: 5.8 Protein Length: 271 Index: 35921
Num Unique	% Cov	Best Disc Score	Best Expect Val
1	8.5	0.2	0.049
m/z	z	Da	DB Peptide	Variable Mods	Fraction	RT	Start	End	Score	Expect	# in DB
844.73	3	-0.058	(R)RVEISACGLVVDDVIGDVIIFSR(W)		120523_09_SE_1_3	50.3277	135	157	24.6	0.049	1
41 Acc. #: 8984 Species: UNREADABLE Name: gi|1024049890|gb|KZV50083.1| hypothetical protein F511_20586 [Dorcoceras hygrometricum]
Version: 1
Protein MW: 24073.9 Protein pI: 5.8 Protein Length: 216 Index: 8984
Num Unique	% Cov	Best Disc Score	Best Expect Val
1	14.8	0.17	0.048
m/z	z	Da	DB Peptide	Variable Mods	Fraction	RT	Start	End	Score	Expect	# in DB
855.122	4	0.45	(R)DSHAIHKPSSSHQPVVENAGNSNVPAQKNHTK(R)		120523_09_SE_1_3	35.9269	31	62	24.3	0.048	1
42 Acc. #: 24126 Species: UNREADABLE Name: gi|1024014069|gb|KZV34941.1| putative inactive serine/threonine-protein kinase bub1-like [Dorcoceras hygrometricum]
Version: 1
Protein MW: 56545.2 Protein pI: 5.6 Protein Length: 496 Index: 24126
Num Unique	% Cov	Best Disc Score	Best Expect Val
1	2.4	0.08	0.14
m/z	z	Da	DB Peptide	Variable Mods	Fraction	RT	Start	End	Score	Expect	# in DB
673.84	2	0.55	(K)EAMSDINSMFGK(S)	Oxidation@9=37	120523_09_SE_1_3	35.2631	374	385	25.2	0.14	1
43 Acc. #: 23540 Species: UNREADABLE Name: gi|1024015230|gb|KZV35527.1| hypothetical protein F511_21363 [Dorcoceras hygrometricum]
Version: 1
Protein MW: 40660.2 Protein pI: 5.7 Protein Length: 369 Index: 23540
Num Unique	% Cov	Best Disc Score	Best Expect Val
1	3	0.08	0.21
m/z	z	Da	DB Peptide	Variable Mods	Fraction	RT	Start	End	Score	Expect	# in DB
698.331	2	0.48	(-)MLLDAVDYKER(Q)	Acetyl@N-term	120523_09_SE_1_3	14.8598	1	11	25.8	0.21	1
44 Acc. #: 26370 Species: UNREADABLE Name: gi|1024008958|gb|KZV32697.1| 4-coumarate--CoA ligase-like 7-like [Dorcoceras hygrometricum]
Version: 1
Protein MW: 58097.2 Protein pI: 8.9 Protein Length: 530 Index: 26370
Num Unique	% Cov	Best Disc Score	Best Expect Val
1	6.8	0.05	0.14
m/z	z	Da	DB Peptide	Variable Mods	Fraction	RT	Start	End	Score	Expect	# in DB
946.227	4	-0.54	(R)HSGSAGMLVSGVESLIVSVDKLRPLPPGQLGEIWVR(G)		120523_09_SE_1_3	76.6393	362	397	24.8	0.14	1
45 Acc. #: 34074 Species: UNREADABLE Name: gi|1023989606|gb|KZV24993.1| hypothetical protein F511_01963 [Dorcoceras hygrometricum]
Version: 1
Protein MW: 71264.7 Protein pI: 7.8 Protein Length: 670 Index: 34074
Num Unique	% Cov	Best Disc Score	Best Expect Val
1	3.1	0.03	0.078
m/z	z	Da	DB Peptide	Variable Mods	Fraction	RT	Start	End	Score	Expect	# in DB
756.66	3	0.27	(K)SSNILLDSNFEARVADFGLAK(L)		120523_09_SE_1_3	41.0286	465	485	23.7	0.078	1
46 Acc. #: 11438 Species: UNREADABLE Name: gi|1024044748|gb|KZV47629.1| hypothetical protein F511_14415 [Dorcoceras hygrometricum]
Version: 1
Protein MW: 35975.9 Protein pI: 8.2 Protein Length: 314 Index: 11438
Num Unique	% Cov	Best Disc Score	Best Expect Val
1	9.2	0.02	0.66
m/z	z	Da	DB Peptide	Variable Mods	Fraction	RT	Start	End	Score	Expect	# in DB
835.518	4	-0.38	(K)LVATRNLSPDELDCSSFIHPPNHNYNSDK(G)		120523_09_SE_1_3	58.3417	257	285	27.1	0.66	1
47 Acc. #: 34494 Species: UNREADABLE Name: gi|1023988945|gb|KZV24573.1| hypothetical protein F511_10214 [Dorcoceras hygrometricum]
Version: 1
Protein MW: 22116.3 Protein pI: 9.1 Protein Length: 187 Index: 34494
Num Unique	% Cov	Best Disc Score	Best Expect Val
1	13.4	0.02	0.59
m/z	z	Da	DB Peptide	Variable Mods	Fraction	RT	Start	End	Score	Expect	# in DB
733.001	4	-0.097	(R)SFKPMPETMPSFQSPQVPQQSNHQR(F)	Oxidation@9=15	120523_09_SE_1_3	40.8866	157	181	26.9	0.59	1
48 Acc. #: 22202 Species: UNREADABLE Name: gi|1024018676|gb|KZV36865.1| hypothetical protein F511_33305 [Dorcoceras hygrometricum]
Version: 1
Protein MW: 15678.8 Protein pI: 9.8 Protein Length: 140 Index: 22202
Num Unique	% Cov	Best Disc Score	Best Expect Val
1	6.4	0.02	0.12
m/z	z	Da	DB Peptide	Variable Mods	Fraction	RT	Start	End	Score	Expect	# in DB
485.786	2	0.55	(R)ASNKSSTMK(Y)	Oxidation@8	120523_09_SE_1_3	39.0806	75	83	24.2	0.12	1
49 Acc. #: 23234 Species: UNREADABLE Name: gi|1024016288|gb|KZV35833.1| hypothetical protein F511_25546 [Dorcoceras hygrometricum]
Version: 1
Protein MW: 11379.4 Protein pI: 9.1 Protein Length: 104 Index: 23234
Num Unique	% Cov	Best Disc Score	Best Expect Val
1	27.9	0.01	0.37
m/z	z	Da	DB Peptide	Variable Mods	Fraction	RT	Start	End	Score	Expect	# in DB
789.484	4	-0.44	(-)MRPLLSQPSMPAIASATTTPQVAKELGFR(S)	Acetyl&Oxidation@(N-term&(1|10))||Acetyl+Oxidation@1	120523_09_SE_1_3	52.1515	1	29	26.1	0.37	1
50 Acc. #: 19153 Species: UNREADABLE Name: gi|1024026363|gb|KZV39914.1| ABC transporter G family member 28 [Dorcoceras hygrometricum]
Version: 1
Protein MW: 123447.5 Protein pI: 6.8 Protein Length: 1139 Index: 19153
Num Unique	% Cov	Best Disc Score	Best Expect Val
1	2.1	0.01	0.62
m/z	z	Da	DB Peptide	Variable Mods	Fraction	RT	Start	End	Score	Expect	# in DB
590.11	4	-0.2	(K)IPGQPKPGSDAALPPMPVGGSEQK(G)		120523_09_SE_1_3	22.4748	482	505	26.9	0.62	1
Search Compare in ProteinProspector 6.4.3
© Copyright (2003-2022) The Regents of the University of California.
