# Supplementary material for: Protein Changes in Shade and Sun Haberlea rhodopensis Leaves during Dehydration at Optimal and Low Temperatures
Source: Plants (Basel). 2023 Jan 15;12(2):401. doi: 10.3390/plants12020401 (PMC9861795; doi:10.3390/plants12020401)
Supplement: Supplementary file 1 [file plants-12-00401-s001.zip › Table S2.xlsx]

## Sheet: UniProt DB database search
Home | MS-Fit | MS-Tag | MS-Filter | MS-Pattern | MS-Bridge | MS-Digest | MS-Product | MS-Comp | DB-Stat | MS-Isotope | MS-Homology | MS-Viewer
Batch-Tag | Batch-Tag Web | Search Compare | Results Management | Search Table | Logout
Search Compare Search Results
Union: Sarvari_Eva/221026_02 06
Uniprot Dorcoceras hygrometricum/Haberlea rhodopensis search
ID: 3 (120523_08_SE_1a_3_ctrl)
Number of Proteins (After Homology Filtering): 43
Search 1 Number of Data Spectra: 1363
Search 1 Proteins (Pre Homology Filtering): 79
Database: User Protein (48439/48439 entries searched)
[+] Original Search Parameters 1
	Band 1 Control
Rank	Uniq Pep	Acc #	Sarvari_Eva/221026_02 06					Protein MW	Species	Protein Name
			Num Unique	Peptide Count	% Cov	Best Disc Score	Best Expect Val
1		164	18	21	50.1	4.77	4.4e-08	53515.3	UNREADABLE	gi|1092181945|gb|AOY41463.1| ribulose 1,5-bisphosphate carboxylase/oxygenase large subunit (chloroplast) [Haberlea rhodopensis]
2		17213	10	10	23.2	4.68	2.5e-08	48458.7	UNREADABLE	gi|1024030973|gb|KZV41854.1| glyceraldehyde-3-phosphate dehydrogenase B, chloroplastic [Dorcoceras hygrometricum]
2022-02-01	1	18225	9	9	20	4.68	2.5e-08	48106.2	UNREADABLE	gi|1024029385|gb|KZV40842.1| glyceraldehyde-3-phosphate dehydrogenase B, chloroplastic-like [Dorcoceras hygrometricum]
3		168	11	12	33.5	3.19	2e-06	55354.6	UNREADABLE	gi|1092181941|gb|AOY41459.1| ATP synthase CF1 alpha subunit (chloroplast) [Haberlea rhodopensis]
4		165	6	6	19.8	5.2	1.2e-08	54184.5	UNREADABLE	gi|1092181944|gb|AOY41462.1| PsbB (chloroplast) [Haberlea rhodopensis]
5		32947	6	6	19	4.46	1.5e-07	53876.2	UNREADABLE	gi|1023992205|gb|KZV26120.1| ribulose bisphosphate carboxylase/oxygenase activase, chloroplastic [Dorcoceras hygrometricum]
2022-05-01	6	4211	7	7	13.3	3.23	5.7e-07	46922	UNREADABLE	gi|1024058127|gb|KZV54856.1| ribulose bisphosphate carboxylase/oxygenase activase, chloroplastic [Dorcoceras hygrometricum]
6		7813	6	6	18.6	4.36	7.2e-07	57134.9	UNREADABLE	gi|1024051708|gb|KZV51254.1| glucose-1-phosphate adenylyltransferase [Dorcoceras hygrometricum]
7		31469	6	6	15.4	3.66	2.2e-06	50605.9	UNREADABLE	gi|1023996074|gb|KZV27598.1| phosphoglycerate kinase, chloroplastic-like [Dorcoceras hygrometricum]
2022-07-01	3	7802	4	5	13.1	4.03	2.3e-06	48578.3	UNREADABLE	gi|1024051719|gb|KZV51265.1| phosphoglycerate kinase, chloroplastic-like [Dorcoceras hygrometricum]
8		24314	6	8	19.5	3.77	2.7e-07	51929.2	UNREADABLE	gi|1024013872|gb|KZV34753.1| hypothetical protein F511_00655 [Dorcoceras hygrometricum]
9		40529	4	4	11.9	4.31	7.1e-08	44898.2	UNREADABLE	gi|1023974503|gb|KZV18538.1| fructose-1,6-bisphosphatase, chloroplastic-like [Dorcoceras hygrometricum]
10		167	5	5	17.9	3	1.8e-05	53852.3	UNREADABLE	gi|1092181942|gb|AOY41460.1| ATP synthase CF1 beta subunit (chloroplast) [Haberlea rhodopensis]
11		11723	3	3	6.3	5.24	4.8e-09	80436.7	UNREADABLE	gi|1024044403|gb|KZV47344.1| transketolase [Dorcoceras hygrometricum]
2022-11-01	1	12881	3	3	6.5	5.24	4.8e-09	79963.3	UNREADABLE	gi|1024042852|gb|KZV46186.1| transketolase, chloroplastic [Dorcoceras hygrometricum]
12		1539	5	5	14.1	3.07	1.1e-05	42718.1	UNREADABLE	gi|1024062619|gb|KZV57528.1| fructose-bisphosphate aldolase 1, chloroplastic [Dorcoceras hygrometricum]
2022-12-01	1	5712	5	5	17.8	3.07	1.1e-05	43384.9	UNREADABLE	gi|1024055199|gb|KZV53355.1| fructose-bisphosphate aldolase 1, chloroplastic [Dorcoceras hygrometricum]
13		36526	4	4	17.6	2.97	1.2e-05	36930.6	UNREADABLE	gi|1023983841|gb|KZV22541.1| actin-7 [Dorcoceras hygrometricum]
14		163	4	4	16.7	2.38	2.1e-05	51910.3	UNREADABLE	gi|1092181946|gb|AOY41464.1| photosystem II CP43 chlorophyll apoprotein (chloroplast) [Haberlea rhodopensis]
15		21884	3	3	14.7	3.57	3.1e-08	44416.2	UNREADABLE	gi|1024019037|gb|KZV37183.1| aminomethyltransferase, mitochondrial [Dorcoceras hygrometricum]
16		11844	3	3	10.9	2.68	1e-05	54380.4	UNREADABLE	gi|1024044281|gb|KZV47223.1| citrate synthase, mitochondrial [Dorcoceras hygrometricum]
17		6655	3	3	9.2	2.36	0.00011	56636.5	UNREADABLE	gi|1024053701|gb|KZV52412.1| catalase isozyme 1, partial [Dorcoceras hygrometricum]
18		10425	2	2	4.1	3.53	6.3e-07	74992.3	UNREADABLE	gi|1024047173|gb|KZV48642.1| heat shock protein [Dorcoceras hygrometricum]
19		44098	1	1	5.4	4.36	1.1e-07	39311.6	UNREADABLE	gi|1023966618|gb|KZV14969.1| glutamine synthetase nodule isozyme [Dorcoceras hygrometricum]
20		32915	1	1	3.9	4.23	8.1e-08	45170.7	UNREADABLE	gi|1023992247|gb|KZV26152.1| hypothetical protein F511_06319 [Dorcoceras hygrometricum]
21		13187	2	2	5.6	2.09	0.00011	66052.4	UNREADABLE	gi|1024042478|gb|KZV45880.1| polyphenol oxidase, chloroplastic-like [Dorcoceras hygrometricum]
21-1	1	4625	2	2	4.8	1.17	0.00019	65201.2	UNREADABLE	gi|1024057280|gb|KZV54442.1| polyphenol oxidase, chloroplastic-like [Dorcoceras hygrometricum]
22		38979	1	1	4.3	3.08	2.2e-06	38257.5	UNREADABLE	gi|1023977901|gb|KZV20088.1| peroxidase 12 [Dorcoceras hygrometricum]
23		10122	2	2	10.1	1.74	0.0001	31957.1	UNREADABLE	gi|1024047516|gb|KZV48945.1| Monodehydroascorbate reductase family protein [Dorcoceras hygrometricum]
24		15615	2	2	6.9	1.56	0.00013	68495.9	UNREADABLE	gi|1024035148|gb|KZV43452.1| V-type proton ATPase catalytic subunit A-like [Dorcoceras hygrometricum]
25		161	2	2	9.9	1.64	7.3e-05	39593.9	UNREADABLE	gi|1092181948|gb|AOY41466.1| photosystem II protein D2 (chloroplast) [Haberlea rhodopensis]
26		26097	1	1	6.2	2.59	4.1e-06	45181.6	UNREADABLE	gi|1024009339|gb|KZV32970.1| succinyl-CoA ligase [Dorcoceras hygrometricum]
27		160	1	1	3.1	2.36	2.4e-05	38863.8	UNREADABLE	gi|1092181949|gb|AOY41467.1| photosystem II protein D1 (chloroplast) [Haberlea rhodopensis]
28		1147	1	1	2.6	2.25	1.1e-05	47782.9	UNREADABLE	gi|1024063055|gb|KZV57920.1| ribulose bisphosphate carboxylase/oxygenase activase, chloroplastic-like [Dorcoceras hygrometricum]
29		19725	1	1	3.1	1.82	0.00016	54274.2	UNREADABLE	gi|1024024940|gb|KZV39342.1| V-type proton ATPase subunit B 2 [Dorcoceras hygrometricum]
30		322	1	1	4.7	1.7	3.6e-05	32179.9	UNREADABLE	gi|1024064765|gb|KZV58745.1| glyceraldehyde-3-phosphate dehydrogenase, cytosolic [Dorcoceras hygrometricum]
31		37888	1	1	2.3	1.64	6.8e-05	44336.3	UNREADABLE	gi|1023981406|gb|KZV21179.1| hypothetical protein F511_24743 [Dorcoceras hygrometricum]
32		44142	1	1	10	1.52	5.7e-05	20304.7	UNREADABLE	gi|1023966559|gb|KZV14925.1| ribulose bisphosphate carboxylase small chain, chloroplastic-like [Dorcoceras hygrometricum]
33		15920	1	1	6.6	1.51	0.00053	56153	UNREADABLE	gi|1024034630|gb|KZV43147.1| citrate synthase, glyoxysomal [Dorcoceras hygrometricum]
34		5263	1	1	3.6	1.51	4.9e-05	46198.3	UNREADABLE	gi|1024056099|gb|KZV53804.1| isocitrate dehydrogenase [Dorcoceras hygrometricum]
35		18345	1	1	8.7	1.41	0.00018	28369.4	UNREADABLE	gi|1024029208|gb|KZV40722.1| chlorophyll a/b-binding family protein [Dorcoceras hygrometricum]
36		24100	2	2	2.5	0.6	0.0061	127901	UNREADABLE	gi|1024014095|gb|KZV34967.1| sedoheptulose-1,7-bisphosphatase, chloroplastic-like [Dorcoceras hygrometricum]
37		29334	1	1	3	0.46	0.0032	47702.3	UNREADABLE	gi|1024000869|gb|KZV29733.1| peroxisomal (S)-2-hydroxy-acid oxidase-like [Dorcoceras hygrometricum]
ID: 4 (120523_09_SE_1_3)
Number of Proteins (After Homology Filtering): 40
Search 1 Number of Data Spectra: 1333
Search 1 Proteins (Pre Homology Filtering): 73
Database: User Protein (48439/48439 entries searched)
[+] Original Search Parameters 1
	Band 1 8% RWC
Rank	Uniq Pep	Acc #	Sarvari_Eva/221026_02 06					Protein MW	Species	Protein Name													present in control	new	not a correct mW
			Num Unique	Peptide Count	% Cov	Best Disc Score	Best Expect Val
1		164	18	21	43.3	4.65	8e-08	53515.3	UNREADABLE	gi|1092181945|gb|AOY41463.1| ribulose 1,5-bisphosphate carboxylase/oxygenase large subunit (chloroplast) [Haberlea rhodopensis]													*
2		168	10	10	26.4	3.83	2.4e-06	55354.6	UNREADABLE	gi|1092181941|gb|AOY41459.1| ATP synthase CF1 alpha subunit (chloroplast) [Haberlea rhodopensis]													*
3		11844	8	8	20.3	4	1.1e-06	54380.4	UNREADABLE	gi|1024044281|gb|KZV47223.1| citrate synthase, mitochondrial [Dorcoceras hygrometricum]													*
4		11723	5	5	8.1	4.48	7.3e-08	80436.7	UNREADABLE	gi|1024044403|gb|KZV47344.1| transketolase [Dorcoceras hygrometricum]													*
2022-04-01	1	12881	5	5	8.2	4.48	7.3e-08	79963.3	UNREADABLE	gi|1024042852|gb|KZV46186.1| transketolase, chloroplastic [Dorcoceras hygrometricum]													*
5		22737	5	5	9.3	3.98	5.5e-07	70962	UNREADABLE	gi|1024017033|gb|KZV36330.1| heat shock cognate 70 kDa protein 2-like [Dorcoceras hygrometricum]														*	*
2022-05-01	2	10829	4	4	7.2	3.98	5.5e-07	73562.9	UNREADABLE	gi|1024046407|gb|KZV48238.1| luminal-binding protein 5-like [Dorcoceras hygrometricum]														*	*
2022-05-02	1	41860	3	3	5.3	3.98	5.5e-07	73824.3	UNREADABLE	gi|1023970679|gb|KZV17207.1| luminal-binding protein 5-like [Dorcoceras hygrometricum]														*	*
6		19725	4	4	16.2	3.69	2.8e-07	54274.2	UNREADABLE	gi|1024024940|gb|KZV39342.1| V-type proton ATPase subunit B 2 [Dorcoceras hygrometricum]													*
7		37948	3	3	11.3	3.79	1e-06	47614.5	UNREADABLE	gi|1023981319|gb|KZV21119.1| enolase [Dorcoceras hygrometricum]														*
8		32947	3	3	9.6	4.54	3.3e-09	53876.2	UNREADABLE	gi|1023992205|gb|KZV26120.1| ribulose bisphosphate carboxylase/oxygenase activase, chloroplastic [Dorcoceras hygrometricum]													*
9		38979	3	3	10.3	3.16	1.8e-06	38257.5	UNREADABLE	gi|1023977901|gb|KZV20088.1| peroxidase 12 [Dorcoceras hygrometricum]													*
10		10425	2	2	6	4.52	9.9e-08	74992.3	UNREADABLE	gi|1024047173|gb|KZV48642.1| heat shock protein [Dorcoceras hygrometricum]													*
2022-10-01	1	36363	2	2	4.3	4.52	9.9e-08	73922.1	UNREADABLE	gi|1023984447|gb|KZV22704.1| stromal 70 kDa heat shock-related protein, chloroplastic [Dorcoceras hygrometricum]														*	*
11		32915	2	2	7.1	4.41	5.9e-08	45170.7	UNREADABLE	gi|1023992247|gb|KZV26152.1| hypothetical protein F511_06319 [Dorcoceras hygrometricum]													*
12		33566	3	3	12.6	2.6	5.6e-06	43535.2	UNREADABLE	gi|1023991379|gb|KZV25501.1| UDP-D-apiose/UDP-D-xylose synthase 2 [Dorcoceras hygrometricum]														*
2022-12-01	1	29651	3	3	11.8	2.6	5.6e-06	43629.4	UNREADABLE	gi|1024000501|gb|KZV29416.1| UDP-D-apiose/UDP-D-xylose synthase 2-like [Dorcoceras hygrometricum]														*
2022-12-02	1	41002	3	3	11.8	2.6	5.6e-06	43725.5	UNREADABLE	gi|1023973923|gb|KZV18065.1| UDP-D-apiose/UDP-D-xylose synthase 2-like [Dorcoceras hygrometricum]														*
13		37564	3	3	8.4	2.51	1.3e-05	64131.9	UNREADABLE	gi|1023981831|gb|KZV21503.1| chaperonin 60 subunit beta 2, chloroplastic [Dorcoceras hygrometricum]														*	*
14		24314	2	2	6.7	3.13	1e-06	51929.2	UNREADABLE	gi|1024013872|gb|KZV34753.1| hypothetical protein F511_00655 [Dorcoceras hygrometricum]														*
15		27696	2	2	4.4	2.21	3.8e-05	68228.4	UNREADABLE	gi|1024005291|gb|KZV31371.1| gamma aminobutyrate transaminase 1, mitochondrial-like [Dorcoceras hygrometricum]														*	*
16		22843	2	2	3.7	2.04	0.00068	79897.5	UNREADABLE	gi|1024016905|gb|KZV36224.1| heat shock cognate protein 80-like [Dorcoceras hygrometricum]														*	*
17		6655	2	2	6.4	2.03	4.8e-05	56636.5	UNREADABLE	gi|1024053701|gb|KZV52412.1| catalase isozyme 1, partial [Dorcoceras hygrometricum]													*
18		19152	2	2	4.2	1.95	3e-05	62638.1	UNREADABLE	gi|1024026364|gb|KZV39915.1| ruBisCO large subunit-binding protein subunit alpha [Dorcoceras hygrometricum]														*
19		40529	1	1	2.9	3.26	3.9e-06	44898.2	UNREADABLE	gi|1023974503|gb|KZV18538.1| fructose-1,6-bisphosphatase, chloroplastic-like [Dorcoceras hygrometricum]													*
20		34458	1	1	3.9	3.09	2.4e-06	55683.9	UNREADABLE	gi|1023989006|gb|KZV24609.1| hypothetical protein F511_06435 [Dorcoceras hygrometricum]														*
21		38747	1	1	2.8	2.88	5.7e-06	52865.9	UNREADABLE	gi|1023978896|gb|KZV20320.1| V-type proton ATPase subunit H [Dorcoceras hygrometricum]														*
22		22631	1	1	2.1	2.84	1.5e-06	84776.7	UNREADABLE	gi|1024017177|gb|KZV36436.1| methionine synthase [Dorcoceras hygrometricum]														*	*
23		22627	1	1	2.7	2.56	1.2e-05	72765.8	UNREADABLE	gi|1024017190|gb|KZV36440.1| hypothetical protein F511_15945 [Dorcoceras hygrometricum]														*	*
24		7813	1	1	2.7	2.46	1e-05	57134.9	UNREADABLE	gi|1024051708|gb|KZV51254.1| glucose-1-phosphate adenylyltransferase [Dorcoceras hygrometricum]													*
25		22551	2	2	7	1.74	1e-05	46848	UNREADABLE	gi|1024017283|gb|KZV36516.1| eukaryotic initiation factor 4A-14-like [Dorcoceras hygrometricum]														*
25-1	1	40166	2	2	7	1.74	1e-05	46966.2	UNREADABLE	gi|1023975117|gb|KZV18901.1| hypothetical protein F511_12006 [Dorcoceras hygrometricum]														*
26		167	1	1	2.8	2.05	0.0003	53852.3	UNREADABLE	gi|1092181942|gb|AOY41460.1| ATP synthase CF1 beta subunit (chloroplast) [Haberlea rhodopensis]													*
27		1962	1	1	3.3	1.83	5.3e-05	49021.5	UNREADABLE	gi|1024061746|gb|KZV57105.1| elongation factor 1-gamma-like [Dorcoceras hygrometricum]														*
28		13187	2	2	3.7	1.04	0.00014	66052.4	UNREADABLE	gi|1024042478|gb|KZV45880.1| polyphenol oxidase, chloroplastic-like [Dorcoceras hygrometricum]													*
28-1	1	4625	2	2	4.8	1.04	0.00014	65201.2	UNREADABLE	gi|1024057280|gb|KZV54442.1| polyphenol oxidase, chloroplastic-like [Dorcoceras hygrometricum]													*
29		23918	1	1	2.4	1.27	0.00065	49486.7	UNREADABLE	gi|1024014334|gb|KZV35149.1| elongation factor 1-alpha [Dorcoceras hygrometricum]														*
30		163	1	1	3.6	1.02	0.00032	51910.3	UNREADABLE	gi|1092181946|gb|AOY41464.1| photosystem II CP43 chlorophyll apoprotein (chloroplast) [Haberlea rhodopensis]													*
31		31629	1	1	2.8	0.84	0.00042	118493	UNREADABLE	gi|1023995885|gb|KZV27438.1| sucrose-phosphate synthase [Dorcoceras hygrometricum]														*	*
32		42509	1	1	7	0.57	0.0098	20273.2	UNREADABLE	gi|1023969311|gb|KZV16558.1| scopoletin glucosyltransferase-like [Dorcoceras hygrometricum]														*	*
ID: 1 (120523_06_SE_6a_3_ctrl)
Number of Proteins (After Homology Filtering): 17
Search 1 Number of Data Spectra: 1224
Search 1 Proteins (Pre Homology Filtering): 42
Database: User Protein (48439/48439 entries searched)
[+] Original Search Parameters 1
	Band 8 Control
Rank	Uniq Pep	Acc #	Sarvari_Eva/221026_02 06					Protein MW	Species	Protein Name
			Num Unique	Peptide Count	% Cov	Best Disc Score	Best Expect Val
1		164	5	5	9.1	3.08	0.00022	53515.3	UNREADABLE	gi|1092181945|gb|AOY41463.1| ribulose 1,5-bisphosphate carboxylase/oxygenase large subunit (chloroplast) [Haberlea rhodopensis]
2		161	3	3	12.7	4.16	7.5e-07	39593.9	UNREADABLE	gi|1092181948|gb|AOY41466.1| photosystem II protein D2 (chloroplast) [Haberlea rhodopensis]
3		24078	3	3	28.2	2.75	6.6e-06	21032.1	UNREADABLE	gi|1024014117|gb|KZV34989.1| thylakoid lumenal 15 kDa protein 1, chloroplastic-like [Dorcoceras hygrometricum]
4		168	2	2	5.7	3.72	2.9e-06	55354.6	UNREADABLE	gi|1092181941|gb|AOY41459.1| ATP synthase CF1 alpha subunit (chloroplast) [Haberlea rhodopensis]
5		24022	3	3	29.1	1.97	0.00046	11409.5	UNREADABLE	gi|1024014198|gb|KZV35045.1| hypothetical protein F511_04350 [Dorcoceras hygrometricum]
6		44142	5	6	28.3	1.15	0.00026	20304.7	UNREADABLE	gi|1023966559|gb|KZV14925.1| ribulose bisphosphate carboxylase small chain, chloroplastic-like [Dorcoceras hygrometricum]
7		24358	1	1	6.3	2.99	0.0001	19845	UNREADABLE	gi|1024013828|gb|KZV34709.1| hypothetical protein F511_00611 [Dorcoceras hygrometricum]
8		13981	2	2	16.2	1.78	0.00014	16342.8	UNREADABLE	gi|1024040408|gb|KZV45086.1| nucleoside diphosphate kinase 1-like [Dorcoceras hygrometricum]
9		134	1	1	11.9	2.26	5.8e-05	12086.3	UNREADABLE	gi|1092181975|gb|AOY41493.1| ribosomal protein S18 (chloroplast) [Haberlea rhodopensis]
10		42548	1	1	2.7	2.19	0.00015	40625.6	UNREADABLE	gi|1023969271|gb|KZV16519.1| putative carboxylesterase 8-like [Dorcoceras hygrometricum]
11		138	2	2	18.8	1.06	0.00032	14819.3	UNREADABLE	gi|1092181971|gb|AOY41489.1| ATP synthase CF1 epsilon subunit (chloroplast) [Haberlea rhodopensis]
12		5900	1	1	7.1	1.7	4e-05	22949.5	UNREADABLE	gi|1024055000|gb|KZV53167.1| photosystem I reaction center subunit II, chloroplastic-like [Dorcoceras hygrometricum]
13		2637	2	2	24.1	1.17	0.00013	13977.2	UNREADABLE	gi|1024060589|gb|KZV56430.1| hypothetical protein F511_00427 [Dorcoceras hygrometricum]
14		8743	1	1	3	1.42	0.00016	27916.9	UNREADABLE	gi|1024050215|gb|KZV50324.1| Chlorophyll a-b binding protein 2 [Dorcoceras hygrometricum]
15		13317	1	1	9.3	1.02	0.00029	12030.3	UNREADABLE	gi|1024042265|gb|KZV45750.1| hypothetical protein F511_40959 [Dorcoceras hygrometricum]
16		19451	1	1	5.2	1.01	0.00021	31246.8	UNREADABLE	gi|1024025959|gb|KZV39616.1| hypothetical protein F511_02079 [Dorcoceras hygrometricum]
17		36368	1	1	7.1	0.74	0.0056	12258	UNREADABLE	gi|1023984442|gb|KZV22699.1| Cytochrome c [Dorcoceras hygrometricum]
ID: 2 (120523_07_SE_6_3)
Number of Proteins (After Homology Filtering): 19
Search 1 Number of Data Spectra: 1419
Search 1 Proteins (Pre Homology Filtering): 43
Database: User Protein (48439/48439 entries searched)
[+] Original Search Parameters 1
	Band 8 8% RWC
																							present in control	new	not a correct MW
Rank	Uniq Pep	Acc #	Sarvari_Eva/221026_02 06					Protein MW	Species	Protein Name
			Num Unique	Peptide Count	% Cov	Best Disc Score	Best Expect Val
1		164	6	6	16.6	4.04	1.5e-07	53515.3	UNREADABLE	gi|1092181945|gb|AOY41463.1| ribulose 1,5-bisphosphate carboxylase/oxygenase large subunit (chloroplast) [Haberlea rhodopensis]													*
2		138	5	5	54.9	3.17	4.7e-07	14819.3	UNREADABLE	gi|1092181971|gb|AOY41489.1| ATP synthase CF1 epsilon subunit (chloroplast) [Haberlea rhodopensis]													*
3		13981	4	4	33.1	3.5	1.1e-06	16342.8	UNREADABLE	gi|1024040408|gb|KZV45086.1| nucleoside diphosphate kinase 1-like [Dorcoceras hygrometricum]													*
4		24078	2	2	18.5	3.44	2.7e-07	21032.1	UNREADABLE	gi|1024014117|gb|KZV34989.1| thylakoid lumenal 15 kDa protein 1, chloroplastic-like [Dorcoceras hygrometricum]													*
5		11451	1	1	11.1	3.96	6.3e-07	15209.2	UNREADABLE	gi|1024044731|gb|KZV47616.1| hypothetical protein F511_12885 [Dorcoceras hygrometricum]														*
6		44142	5	7	23.9	1.11	0.00016	20304.7	UNREADABLE	gi|1023966559|gb|KZV14925.1| ribulose bisphosphate carboxylase small chain, chloroplastic-like [Dorcoceras hygrometricum]													*
7		30683	1	1	7.3	3.23	1.1e-05	20554.8	UNREADABLE	gi|1023997883|gb|KZV28384.1| Early light-induced protein [Dorcoceras hygrometricum]														*
8		37334	1	1	4.8	2.75	1.8e-05	36677.8	UNREADABLE	gi|1023982083|gb|KZV21733.1| Galactose mutarotase-like superfamily protein isoform 1 [Dorcoceras hygrometricum]														*	*
9		322	1	1	4.7	2.73	1.3e-06	32179.9	UNREADABLE	gi|1024064765|gb|KZV58745.1| glyceraldehyde-3-phosphate dehydrogenase, cytosolic [Dorcoceras hygrometricum]														*	*
10		2379	1	1	32.5	2.02	0.00039	9063.1	UNREADABLE	gi|1024061194|gb|KZV56688.1| cytochrome c oxidase subunit 6b-like [Dorcoceras hygrometricum]														*
11		161	1	1	3.7	1.96	8e-05	39593.9	UNREADABLE	gi|1092181948|gb|AOY41466.1| photosystem II protein D2 (chloroplast) [Haberlea rhodopensis]													*
12		24314	2	2	5.9	1.4	0.00015	51929.2	UNREADABLE	gi|1024013872|gb|KZV34753.1| hypothetical protein F511_00655 [Dorcoceras hygrometricum]														*	*
13		8743	2	2	16.3	1.17	0.00027	27916.9	UNREADABLE	gi|1024050215|gb|KZV50324.1| Chlorophyll a-b binding protein 2 [Dorcoceras hygrometricum]													*
14		168	1	1	4.9	1.64	0.0001	55354.6	UNREADABLE	gi|1092181941|gb|AOY41459.1| ATP synthase CF1 alpha subunit (chloroplast) [Haberlea rhodopensis]													*
15		19778	1	1	2.7	1.58	4.2e-05	67529.1	UNREADABLE	gi|1024024856|gb|KZV39289.1| actin-7-like [Dorcoceras hygrometricum]														*	*
16		44805	2	2	13.9	1.09	0.00029	23341.9	UNREADABLE	gi|1023964905|gb|KZV14262.1| triosephosphate isomerase, partial [Dorcoceras hygrometricum]														*
17		12543	1	1	2.8	1.42	0.00068	57166.1	UNREADABLE	gi|1024043224|gb|KZV46524.1| T-complex protein 1 subunit delta [Dorcoceras hygrometricum]														*	*
18		19451	1	1	5.2	1.32	0.00012	31246.8	UNREADABLE	gi|1024025959|gb|KZV39616.1| hypothetical protein F511_02079 [Dorcoceras hygrometricum]													*
19		167	1	1	3.6	0.58	0.0026	53852.3	UNREADABLE	gi|1092181942|gb|AOY41460.1| ATP synthase CF1 beta subunit (chloroplast) [Haberlea rhodopensis]														*	*
Search Compare in ProteinProspector 6.4.2
© Copyright (2003-2022) The Regents of the University of California.

## Sheet: Uniprot Viridiplantae database 
Home | MS-Fit | MS-Tag | MS-Filter | MS-Pattern | MS-Bridge | MS-Digest | MS-Product | MS-Comp | DB-Stat | MS-Isotope | MS-Homology | MS-Viewer
Batch-Tag | Batch-Tag Web | Search Compare | Results Management | Search Table | Logout
Search Compare Search Results
Union: Sarvari_Eva/UP2020 viridiplantae
ID: 3 (120523_08_SE_1a_3_ctrl)
Number of Proteins (After Homology Filtering): 39
Search 1 Number of Data Spectra: 1363
Search 1 Proteins (Pre Homology Filtering): 1774
Database: UniProtKB.2020.09.02 (10293523/189525031 entries searched)
[+] Original Search Parameters 1
	Band 1 Control
Rank	Acc #	Sarvari_Eva/UP2020 viridiplantae					Protein MW	Species	Protein Name
		Num Unique	Peptide Count	% Cov	Best Disc Score	Best Expect Val
1	Q06GX1	4	4	13.6	3.72	0.00015	56101.6	DRIGR	Photosystem II CP47 reaction center protein
2	A0A5A7UK91	4	5	11.7	3.65	0.00012	50881.1	CUCME	Phosphoglycerate kinase
3	A0A6A4NP62	4	4	13.6	3.48	0.00015	48147.2	LUPAL	Ribulose bisphosphate carboxylase/oxygenase activase
4	A0A5A7QXG4	4	4	7.6	3.42	5.1e-05	65409.9	STRAF	Glyceraldehyde-3-phosphate dehydrogenase
5	A0A059D6F0	3	3	10.9	3.76	3.5e-05	44608.1	EUCGR	D-fructose-1,6-bisphosphate 1-phosphohydrolase
6	A0A1S3V6B6	3	3	6.4	4.04	1.2e-05	80020.1	VIGRR	Transketolase
7	Q1KXW5	5	5	12.8	2.27	0.0009	55517	HELAN	ATP synthase subunit alpha, chloroplastic
8	P30264	3	3	9.6	3.07	0.0017	56506.3	SOLLC	Catalase isozyme 1
9	G7J486	3	3	8.6	2.75	0.00021	53184.4	MEDTR	Elongation factor Tu
10	O03042	4	4	10.6	1.83	0.0029	52955.5	ARATH	Ribulose bisphosphate carboxylase large chain
11	O98766	3	3	11	2.26	0.0017	53776.1	ASACA	ATP synthase subunit beta, chloroplastic
12	P52416	2	2	5.1	3.07	0.0019	55628	VICFA	Glucose-1-phosphate adenylyltransferase small subunit 1, chloroplastic
13	A0A0D6QVF3	2	3	4.9	2.89	0.00025	56928.8	ARACU	Catalase
14	G7J5Y3	2	2	7.9	2.61	0.00069	33684.8	MEDTR	Glyceraldehyde-3-phosphate dehydrogenase
15	P23343	2	2	9.7	2.52	0.0033	41988.6	DAUCA	Actin-1
16	Q7Y1I5	1	1	4	4.34	2.7e-06	44489.1	ORYSJ	Os03g0796501 protein
17	P49364	2	2	9.1	2.24	0.00018	44285.2	PEA	Aminomethyltransferase, mitochondrial
18	Q2IB13	1	1	4.9	3.83	3.7e-05	38206.8	2022-03-09	Ribulose bisphosphate carboxylase large chain (Fragment)
19	A0A2Z7A0L9	1	1	5.4	3.55	7.4e-05	39311.6	9LAMI	Glutamine synthetase
20	A2ZH35	1	1	6.4	2.82	7.3e-05	39630.7	ORYSI	ATPase_AAA_core domain-containing protein
21	Q94IQ1	1	1	4.8	2.76	0.0003	39063.3	TOBAC	Peroxidase
22	Q197Q4	1	1	4.1	2.66	0.00024	42014.7	CUCSA	Alanine--glyoxylate aminotransferase (Fragment)
23	O50036	1	1	2.2	2.63	0.0014	76141.6	SPIOL	Heat shock 70 protein
24	Q0WLM1	1	1	7.3	2.49	0.00018	28902.1	ARATH	Rubisco activase (Fragment)
25	P16096	1	1	3.3	2.23	0.0023	42468.7	SPIOL	Fructose-bisphosphate aldolase, chloroplastic
26	A0A151STU4	1	1	5.7	2.14	0.00018	44080.1	CAJCA	Aminomethyltransferase
27	A0A251N1I1	1	1	4.2	2.1	0.00023	40853.6	PRUPE	Succinate--CoA ligase [ADP-forming] subunit beta, mitochondrial
28	A0A1D9CSC9	1	1	3.5	2.04	0.0015	54184.5	9LAMI	Photosystem II CP47 reaction center protein
29	P84714	1	1	34.9	1.89	0.003	4616.2	CYNCS	Peroxidase (Fragments)
30	P86057	1	1	100	1.89	0.003	1745.8	DAUCA	Peroxidase 4 (Fragment)
31	O20283	1	1	2.8	1.79	0.0038	51526.1	9LAMI	Ribulose bisphosphate carboxylase large chain (Fragment)
32	O80433	1	1	4	1.74	0.0064	52657	DAUCA	Citrate synthase, mitochondrial
33	A0A061DQI7	1	1	6.2	1.66	0.004	45171.5	THECC	Succinate--CoA ligase [ADP-forming] subunit beta, mitochondrial
34	Q10A30	1	1	3.4	1.44	0.0096	38705.6	ORYSJ	Fructose-bisphosphate aldolase 2, cytoplasmic
35	S8DFY8	1	2	4	1.37	0.0053	51970.1	9LAMI	Elongation factor Tu (Fragment)
36	O82770	1	1	17.7	1.36	0.0084	8537.7	LEACR	Glyceraldehyde-3-phosphate dehydrogenase (Fragment)
37	Q3C254	1	1	4.8	1.24	0.0058	42884.2	TOBAC	Mitogen-activated protein kinase
38	A0A4P1R480	1	2	4.4	0.96	0.0097	44927.4	LUPAN	D-fructose-1,6-bisphosphate 1-phosphohydrolase
39	P17094	1	1	2.3	0.84	0.009	44559.5	ARATH	60S ribosomal protein L3-1
ID: 4 (120523_09_SE_1_3)
Number of Proteins (After Homology Filtering): 27
Search 1 Number of Data Spectra: 1333
Search 1 Proteins (Pre Homology Filtering): 1187
Database: UniProtKB.2020.09.02 (10293523/189525031 entries searched)
[+] Original Search Parameters 1
	Band 1 Dehydration
Rank	Acc #	Sarvari_Eva/UP2020 viridiplantae					Protein MW	Species	Protein Name
		Num Unique	Peptide Count	% Cov	Best Disc Score	Best Expect Val
1	Q49L13	7	7	16.6	2.91	0.00069	55513	EUCGG	ATP synthase subunit alpha, chloroplastic
2	A0A1S3V6B6	3	3	4.7	3.64	6.1e-05	80020.1	VIGRR	Transketolase
3	O80433	3	3	7.4	2.74	0.0023	52657	DAUCA	Citrate synthase, mitochondrial
4	Q05554	3	4	11.3	3.05	8.9e-05	49084.5	ANTMA	Ribulose bisphosphate carboxylase large chain (Fragment)
5	Q03684	3	3	5.2	2.59	0.0031	73522.9	TOBAC	Luminal-binding protein 4
6	P30264	2	2	4.3	2.85	0.00074	56506.3	SOLLC	Catalase isozyme 1
7	P26300	2	2	7.4	3.05	9.2e-05	47798.7	SOLLC	Enolase
8	A0A2P6SPY4	2	2	7.3	2.49	0.00041	51228	ROSCH	V-type proton ATPase subunit H
9	I2AWN0	1	1	3.8	4.3	4.4e-06	65307.6	SESIN	Polyphenol oxidase
10	Q06QQ1	1	1	3.5	3.89	3.8e-05	53915.9	9LAMI	Ribulose bisphosphate carboxylase large chain (Fragment)
11	A0A061FHJ5	2	2	7.9	1.98	0.0038	39056.5	THECC	Peroxidase
12	Q7Y1I5	1	1	4	3.8	2.3e-05	44489.1	ORYSJ	Os03g0796501 protein
13	P18122	2	2	3.5	1.97	0.0056	56878	MAIZE	Catalase isozyme 1
14	Q9FVD3	1	1	3.2	3.5	9.7e-05	54056.8	CITSI	Phosphotransferase
15	A0A022R1L7	1	1	3	3.47	9.8e-05	65820.2	ERYGU	Uncharacterized protein
16	O50036	1	1	2.2	3.35	0.00086	76141.6	SPIOL	Heat shock 70 protein
17	O49074	1	1	4.1	3.09	8.3e-05	50701.2	SOLPN	Ribulose bisphosphate carboxylase/oxygenase activase, chloroplastic
18	O50008	1	1	2.1	2.72	4.1e-05	84357.4	ARATH	5-methyltetrahydropteroyltriglutamate--homocysteine methyltransferase 1
19	P11574	1	1	3.1	2.71	0.00062	54108	ARATH	V-type proton ATPase subunit B1
20	Q94IQ1	1	1	4.8	2.06	0.0028	39063.3	TOBAC	Peroxidase
21	A0A2Z7AYV3	1	1	3.9	2.03	0.0015	55683.9	9LAMI	Uncharacterized protein
22	Q01K11	1	1	3.1	1.93	0.0026	56370.8	ORYSI	Gamma-aminobutyrate transaminase 1, mitochondrial
23	A0A022RZM0	1	1	3.9	1.93	0.0044	54939.2	ERYGU	NAD(P)-bd_dom domain-containing protein
24	Q84P52	1	1	2.3	1.93	0.0023	57239.9	SOLLC	Gamma aminobutyrate transaminase 3, chloroplastic
25	A0A3Q7EQD8	1	1	3	1.79	0.0021	47770.5	SOLLC	Catalase domain-containing protein
26	Q2I2N3	1	1	4.1	1.41	0.009	43197.8	SOLTU	UDP-apiose/xylose synthase
27	O48560	1	1	2.2	1.02	0.00039	56911.6	SOYBN	Catalase-3
ID: 1 (120523_06_SE_6a_3_ctrl)
Number of Proteins (After Homology Filtering): 10
Search 1 Number of Data Spectra: 1224
Search 1 Proteins (Pre Homology Filtering): 193
Database: UniProtKB.2020.09.02 (10293523/189525031 entries searched)
[+] Original Search Parameters 1
	Band 8 Control
Rank	Acc #	Sarvari_Eva/UP2020 viridiplantae					Protein MW	Species	Protein Name
		Num Unique	Peptide Count	% Cov	Best Disc Score	Best Expect Val
1	A0A5B7BCG0	3	3	23.6	1.88	0.0058	23859.1	DAVIN	Uncharacterized protein
2	Q06RE6	2	2	5.8	2.5	0.0063	54795.1	JASNU	ATP synthase subunit alpha, chloroplastic
3	P06007	1	1	3.7	3.18	0.0017	39447.7	CHLRE	Photosystem II D2 protein
4	A0A0F6Q0Q4	1	1	3.2	2.5	0.0063	55334.5	9ROSA	ATP synthase subunit alpha, chloroplastic
5	W8T3N6	1	1	5.3	2.47	0.00016	28101.2	9ROSA	Chlorophyll a-b binding protein, chloroplastic
6	P12354	1	1	10.4	2.2	0.0089	13367.4	SPIOL	Photosystem I reaction center subunit IV, chloroplastic
7	Q5ZF87	1	1	3.9	1.95	0.0036	28847.1	PLAMJ	Abhydrolase_3 domain-containing protein (Fragment)
8	A0A4D8YSS7	1	1	12.4	1.93	0.0021	17347.6	SALSN	Glycine cleavage system H protein
9	Q3HVP0	1	1	10.4	1.82	0.0079	11487.1	SOLTU	60s acidic ribosomal protein-like protein
10	A0A059DBB5	1	1	6.9	1.6	0.0072	17279	EUCGR	Bet_v_1 domain-containing protein
ID: 2 (120523_07_SE_6_3)
Number of Proteins (After Homology Filtering): 14
Search 1 Number of Data Spectra: 1419
Search 1 Proteins (Pre Homology Filtering): 317
Database: UniProtKB.2020.09.02 (10293523/189525031 entries searched)
[+] Original Search Parameters 1
	Band 1 8% RWC
Rank	Acc #	Sarvari_Eva/UP2020 viridiplantae					Protein MW	Species	Protein Name
		Num Unique	Peptide Count	% Cov	Best Disc Score	Best Expect Val
1	Q27U82	2	2	18.4	3.22	0.00012	10880.4	EUCGG	Pectinesterase (Fragment)
2	A0A5D3DAB9	2	2	11.7	2.54	0.0013	28226.3	CUCME	Chlorophyll a-b binding protein, chloroplastic
3	A0A5B7BCG0	2	2	14.7	2.58	0.00079	23859.1	DAVIN	Uncharacterized protein
4	A0A2G9HLF6	2	2	20.3	1.81	0.0063	16335.9	9LAMI	Nucleoside diphosphate kinase
5	P48699	1	1	3.6	3.41	8.6e-05	52454.1	DENCL	Ribulose bisphosphate carboxylase large chain (Fragment)
6	Q8M901	2	2	18.9	1.56	0.0097	14661.2	9LAMI	ATP synthase epsilon chain, chloroplastic (Fragment)
7	P30264	1	1	2.4	2.79	0.0017	56506.3	SOLLC	Catalase isozyme 1
8	A0A1S3YMZ5	1	1	10.9	2.68	0.0014	15438.3	TOBAC	uncharacterized protein Mb0911c-like
9	P12354	1	1	10.4	2.61	0.0034	13367.4	SPIOL	Photosystem I reaction center subunit IV, chloroplastic
10	A0A2Z7AJ43	1	1	4.8	2.59	0.0015	36677.8	9LAMI	Aldose 1-epimerase
11	A0A2Z7B2C7	1	1	7.2	2.56	0.0031	20844.2	9LAMI	Early light-induced protein
12	O82770	1	1	17.7	2.36	8.2e-05	8537.7	LEACR	Glyceraldehyde-3-phosphate dehydrogenase (Fragment)
13	P47920	1	1	10.8	2.33	0.0011	16199.8	FLABI	Nucleoside diphosphate kinase B
14	Q8L893	1	1	7.3	2.24	0.0003	23416.5	9ROSI	Phosphoglucomutase (alpha-D-glucose-1,6-bisphosphate-dependent) (Fragment)
Search Compare in ProteinProspector 6.4.2
© Copyright (2003-2022) The Regents of the University of California.
