# Supplementary material for: Protein Changes in Shade and Sun Haberlea rhodopensis Leaves during Dehydration at Optimal and Low Temperatures
Source: Plants (Basel). 2023 Jan 15;12(2):401. doi: 10.3390/plants12020401 (PMC9861795; doi:10.3390/plants12020401)
Supplement: Supplementary file 1 [file plants-12-00401-s001.zip › Table S3.xlsx]

## Sheet: targets
KZV21119.1	enolase [Dorcoceras hygrometricum]
KZV25501.1	UDP-D-apiose/UDP-D-xylose synthase 2 [Dorcoceras hygrometricum]
KZV29416.1	UDP-D-apiose/UDP-D-xylose synthase 2-like [Dorcoceras hygrometricum]
KZV18065.1	UDP-D-apiose/UDP-D-xylose synthase 2-like [Dorcoceras hygrometricum]
KZV20320.1	V-type proton ATPase subunit H [Dorcoceras hygrometricum]
KZV34753.1	hypothetical protein F511_00655 [Dorcoceras hygrometricum]
KZV24609.1	hypothetical protein F511_06435 [Dorcoceras hygrometricum]
KZV36516.1	eukaryotic initiation factor 4A-14-like [Dorcoceras hygrometricum]
KZV18901.1	hypothetical protein F511_12006 [Dorcoceras hygrometricum]
KZV14262.1	triosephosphate isomerase, partial [Dorcoceras hygrometricum]
KZV28384.1	Early light-induced protein [Dorcoceras hygrometricum]
KZV47616.1	hypothetical protein F511_12885 [Dorcoceras hygrometricum]
A0A2Z7AJ43	Galactose mutarotase-like superfamily protein isoform 1 [Dorcoceras hygrometricum]
Q27U82	pectin methylesterase [Eucalyptus globulus subsp. globulus]

## Sheet: KZV21119.1
S1DBJNWX013-Alignment-Descriptions
Description	Scientific Name	Max Score	Total Score	Query Cover	E value	Per. ident	Acc. Len	Accession
enolase [Dorcoceras hygrometricum]	Dorcoceras hygrometricum	910	910	1	0	100	444	https://www.ncbi.nlm.nih.gov/protein/KZV21119.1?report=genbank&log$=prottop&blast_rank=1&RID=S1DBJNWX013","KZV21119.1")
enolase [Sesamum indicum]	Sesamum indicum	875	875	1	0	95.72	444	https://www.ncbi.nlm.nih.gov/protein/XP_011094426.1?report=genbank&log$=prottop&blast_rank=2&RID=S1DBJNWX013","XP_011094426.1")
Enolase [Handroanthus impetiginosus]	Handroanthus impetiginosus	870	870	1	0	95.05	444	https://www.ncbi.nlm.nih.gov/protein/PIN03198.1?report=genbank&log$=prottop&blast_rank=3&RID=S1DBJNWX013","PIN03198.1")
hypothetical protein Pfo_030615 [Paulownia fortunei]	Paulownia fortunei	869	869	1	0	94.82	444	https://www.ncbi.nlm.nih.gov/protein/KAI3473324.1?report=genbank&log$=prottop&blast_rank=4&RID=S1DBJNWX013","KAI3473324.1")
enolase [Andrographis paniculata]	Andrographis paniculata	868	868	1	0	94.82	444	https://www.ncbi.nlm.nih.gov/protein/XP_051132145.1?report=genbank&log$=prottop&blast_rank=5&RID=S1DBJNWX013","XP_051132145.1")
enolase-like [Sesamum indicum]	Sesamum indicum	867	867	1	0	95.05	444	https://www.ncbi.nlm.nih.gov/protein/XP_011101486.1?report=genbank&log$=prottop&blast_rank=6&RID=S1DBJNWX013","XP_011101486.1")
hypothetical protein Pfo_004169 [Paulownia fortunei]	Paulownia fortunei	867	867	1	0	94.59	444	https://www.ncbi.nlm.nih.gov/protein/KAI3447504.1?report=genbank&log$=prottop&blast_rank=7&RID=S1DBJNWX013","KAI3447504.1")
enolase [Olea europaea subsp. europaea]	Olea europaea subsp. europaea	860	860	1	0	94.14	444	https://www.ncbi.nlm.nih.gov/protein/CAA2994302.1?report=genbank&log$=prottop&blast_rank=8&RID=S1DBJNWX013","CAA2994302.1")
Bifunctional enolase 2/transcriptional activator [Striga hermonthica]	Striga hermonthica	859	859	1	0	93.69	444	https://www.ncbi.nlm.nih.gov/protein/CAA0818869.1?report=genbank&log$=prottop&blast_rank=9&RID=S1DBJNWX013","CAA0818869.1")
enolase [Olea europaea]	Olea europaea	857	857	1	0	93.92	444	https://www.ncbi.nlm.nih.gov/protein/QDV59706.1?report=genbank&log$=prottop&blast_rank=10&RID=S1DBJNWX013","QDV59706.1")
Bifunctional enolase 2/transcriptional activator [Striga hermonthica]	Striga hermonthica	852	852	1	0	93.24	444	https://www.ncbi.nlm.nih.gov/protein/CAA0830394.1?report=genbank&log$=prottop&blast_rank=11&RID=S1DBJNWX013","CAA0830394.1")
enolase [Olea europaea subsp. europaea]	Olea europaea subsp. europaea	850	850	1	0	93.02	444	https://www.ncbi.nlm.nih.gov/protein/CAA3007727.1?report=genbank&log$=prottop&blast_rank=12&RID=S1DBJNWX013","CAA3007727.1")
PREDICTED: enolase [Erythranthe guttata]	Erythranthe guttata	850	850	1	0	92.34	444	https://www.ncbi.nlm.nih.gov/protein/XP_012840098.1?report=genbank&log$=prottop&blast_rank=13&RID=S1DBJNWX013","XP_012840098.1")
enolase [Coffea eugenioides]	Coffea eugenioides	850	850	1	0	93.24	444	https://www.ncbi.nlm.nih.gov/protein/XP_027174955.1?report=genbank&log$=prottop&blast_rank=14&RID=S1DBJNWX013","XP_027174955.1")
enolase-like [Andrographis paniculata]	Andrographis paniculata	850	850	1	0	93.02	444	https://www.ncbi.nlm.nih.gov/protein/XP_051130262.1?report=genbank&log$=prottop&blast_rank=15&RID=S1DBJNWX013","XP_051130262.1")
enolase-like [Andrographis paniculata]	Andrographis paniculata	850	850	1	0	92.12	444	https://www.ncbi.nlm.nih.gov/protein/XP_051140077.1?report=genbank&log$=prottop&blast_rank=16&RID=S1DBJNWX013","XP_051140077.1")
enolase-like [Andrographis paniculata]	Andrographis paniculata	849	849	1	0	92.12	444	https://www.ncbi.nlm.nih.gov/protein/XP_051148872.1?report=genbank&log$=prottop&blast_rank=17&RID=S1DBJNWX013","XP_051148872.1")
enolase [Coffea arabica]	Coffea arabica	849	849	1	0	93.24	444	https://www.ncbi.nlm.nih.gov/protein/XP_027072612.1?report=genbank&log$=prottop&blast_rank=18&RID=S1DBJNWX013","XP_027072612.1")
Enolase [Perilla frutescens var. hirtella]	Perilla frutescens var. hirtella	849	849	1	0	92.57	444	https://www.ncbi.nlm.nih.gov/protein/KAH6825323.1?report=genbank&log$=prottop&blast_rank=19&RID=S1DBJNWX013","KAH6825323.1")
Enolase [Perilla frutescens var. hirtella]	Perilla frutescens var. hirtella	848	848	1	0	92.57	444	https://www.ncbi.nlm.nih.gov/protein/KAH6797608.1?report=genbank&log$=prottop&blast_rank=20&RID=S1DBJNWX013","KAH6797608.1")
Enolase [Perilla frutescens var. frutescens]	Perilla frutescens var. frutescens	848	848	1	0	92.34	444	https://www.ncbi.nlm.nih.gov/protein/KAH6802718.1?report=genbank&log$=prottop&blast_rank=21&RID=S1DBJNWX013","KAH6802718.1")
Enolase [Perilla frutescens var. hirtella]	Perilla frutescens var. hirtella	847	847	1	0	92.34	444	https://www.ncbi.nlm.nih.gov/protein/KAH6762245.1?report=genbank&log$=prottop&blast_rank=22&RID=S1DBJNWX013","KAH6762245.1")
Enolase [Perilla frutescens var. frutescens]	Perilla frutescens var. frutescens	847	847	1	0	92.34	444	https://www.ncbi.nlm.nih.gov/protein/KAH6807440.1?report=genbank&log$=prottop&blast_rank=23&RID=S1DBJNWX013","KAH6807440.1")
hypothetical protein Leryth_008861 [Lithospermum erythrorhizon]	Lithospermum erythrorhizon	846	846	1	0	91.24	445	https://www.ncbi.nlm.nih.gov/protein/KAG9160482.1?report=genbank&log$=prottop&blast_rank=24&RID=S1DBJNWX013","KAG9160482.1")
enolase [Olea europaea subsp. europaea]	Olea europaea subsp. europaea	845	845	1	0	89.13	469	https://www.ncbi.nlm.nih.gov/protein/CAA2994301.1?report=genbank&log$=prottop&blast_rank=25&RID=S1DBJNWX013","CAA2994301.1")
Enolase [Perilla frutescens var. frutescens]	Perilla frutescens var. frutescens	845	845	1	0	92.12	444	https://www.ncbi.nlm.nih.gov/protein/KAH6798860.1?report=genbank&log$=prottop&blast_rank=26&RID=S1DBJNWX013","KAH6798860.1")
hypothetical protein M9H77_24169 [Catharanthus roseus]	Catharanthus roseus	844	844	1	0	92.12	443	https://www.ncbi.nlm.nih.gov/protein/KAI5664846.1?report=genbank&log$=prottop&blast_rank=27&RID=S1DBJNWX013","KAI5664846.1")
enolase [Solanum lycopersicum]	Solanum lycopersicum	843	843	1	0	91.44	444	https://www.ncbi.nlm.nih.gov/protein/NP_001234080.1?report=genbank&log$=prottop&blast_rank=28&RID=S1DBJNWX013","NP_001234080.1")
enolase [Salvia splendens]	Salvia splendens	843	843	1	0	91.22	444	https://www.ncbi.nlm.nih.gov/protein/XP_042049970.1?report=genbank&log$=prottop&blast_rank=29&RID=S1DBJNWX013","XP_042049970.1")
enolase-like [Salvia splendens]	Salvia splendens	843	843	1	0	91.22	444	https://www.ncbi.nlm.nih.gov/protein/XP_042054299.1?report=genbank&log$=prottop&blast_rank=30&RID=S1DBJNWX013","XP_042054299.1")
enolase-like [Solanum stenotomum]	Solanum stenotomum	843	843	1	0	91.67	444	https://www.ncbi.nlm.nih.gov/protein/XP_049401732.1?report=genbank&log$=prottop&blast_rank=31&RID=S1DBJNWX013","XP_049401732.1")
PREDICTED: enolase [Nicotiana attenuata]	Nicotiana attenuata	843	843	1	0	91.67	444	https://www.ncbi.nlm.nih.gov/protein/XP_019229421.1?report=genbank&log$=prottop&blast_rank=32&RID=S1DBJNWX013","XP_019229421.1")
enolase 1 [Impatiens glandulifera]	Impatiens glandulifera	843	843	1	0	91.89	444	https://www.ncbi.nlm.nih.gov/protein/XP_047330366.1?report=genbank&log$=prottop&blast_rank=33&RID=S1DBJNWX013","XP_047330366.1")
hypothetical protein EJD97_010809 [Solanum chilense]	Solanum chilense	843	843	1	0	91.44	444	https://www.ncbi.nlm.nih.gov/protein/TMW94050.1?report=genbank&log$=prottop&blast_rank=34&RID=S1DBJNWX013","TMW94050.1")
hypothetical protein KY284_005824 [Solanum tuberosum]	Solanum tuberosum	842	842	1	0	91.44	444	https://www.ncbi.nlm.nih.gov/protein/KAH0720794.1?report=genbank&log$=prottop&blast_rank=35&RID=S1DBJNWX013","KAH0720794.1")
hypothetical protein KY289_035369 [Solanum tuberosum]	Solanum tuberosum	842	842	1	0	91.22	444	https://www.ncbi.nlm.nih.gov/protein/KAH0635454.1?report=genbank&log$=prottop&blast_rank=36&RID=S1DBJNWX013","KAH0635454.1")
enolase [Solanum pennellii]	Solanum pennellii	842	842	1	0	91.44	444	https://www.ncbi.nlm.nih.gov/protein/XP_015088120.1?report=genbank&log$=prottop&blast_rank=37&RID=S1DBJNWX013","XP_015088120.1")
PREDICTED: enolase-like isoform X1 [Solanum tuberosum]	Solanum tuberosum	842	842	1	0	91.22	444	https://www.ncbi.nlm.nih.gov/protein/XP_006341172.1?report=genbank&log$=prottop&blast_rank=38&RID=S1DBJNWX013","XP_006341172.1")
PREDICTED: enolase-like [Solanum tuberosum]	Solanum tuberosum	842	842	1	0	91.44	444	https://www.ncbi.nlm.nih.gov/protein/XP_006338945.1?report=genbank&log$=prottop&blast_rank=39&RID=S1DBJNWX013","XP_006338945.1")
enolase [Solanum stenotomum]	Solanum stenotomum	841	841	1	0	90.99	444	https://www.ncbi.nlm.nih.gov/protein/XP_049406862.1?report=genbank&log$=prottop&blast_rank=40&RID=S1DBJNWX013","XP_049406862.1")
Enolase [Datura stramonium]	Datura stramonium	841	841	1	0	91.67	444	https://www.ncbi.nlm.nih.gov/protein/MCD7449302.1?report=genbank&log$=prottop&blast_rank=41&RID=S1DBJNWX013","MCD7449302.1")
hypothetical protein F0562_016101 [Nyssa sinensis]	Nyssa sinensis	841	841	1	0	92.12	444	https://www.ncbi.nlm.nih.gov/protein/KAA8518627.1?report=genbank&log$=prottop&blast_rank=42&RID=S1DBJNWX013","KAA8518627.1")
enolase-like [Salvia splendens]	Salvia splendens	841	841	1	0	91.67	444	https://www.ncbi.nlm.nih.gov/protein/XP_041999499.1?report=genbank&log$=prottop&blast_rank=43&RID=S1DBJNWX013","XP_041999499.1")
Enolase [Macleaya cordata]	Macleaya cordata	840	840	1	0	91.44	444	https://www.ncbi.nlm.nih.gov/protein/OVA04639.1?report=genbank&log$=prottop&blast_rank=44&RID=S1DBJNWX013","OVA04639.1")
hypothetical protein FNV43_RR15640 [Rhamnella rubrinervis]	Rhamnella rubrinervis	840	840	1	0	91.67	444	https://www.ncbi.nlm.nih.gov/protein/KAF3441725.1?report=genbank&log$=prottop&blast_rank=45&RID=S1DBJNWX013","KAF3441725.1")
enolase [Ipomoea triloba]	Ipomoea triloba	840	840	1	0	92.12	444	https://www.ncbi.nlm.nih.gov/protein/XP_031103606.1?report=genbank&log$=prottop&blast_rank=46&RID=S1DBJNWX013","XP_031103606.1")
enolase [Solanum verrucosum]	Solanum verrucosum	840	840	1	0	90.99	444	https://www.ncbi.nlm.nih.gov/protein/XP_049360048.1?report=genbank&log$=prottop&blast_rank=47&RID=S1DBJNWX013","XP_049360048.1")
enolase [Nicotiana tomentosiformis]	Nicotiana tomentosiformis	839	839	1	0	91.44	444	https://www.ncbi.nlm.nih.gov/protein/XP_009623017.1?report=genbank&log$=prottop&blast_rank=48&RID=S1DBJNWX013","XP_009623017.1")
enolase [Solanum lycopersicum]	Solanum lycopersicum	839	839	1	0	91.22	444	https://www.ncbi.nlm.nih.gov/protein/NP_001332774.1?report=genbank&log$=prottop&blast_rank=49&RID=S1DBJNWX013","NP_001332774.1")
enolase [Ziziphus jujuba var. spinosa]	Ziziphus jujuba var. spinosa	839	839	1	0	91.91	445	https://www.ncbi.nlm.nih.gov/protein/XP_015898710.1?report=genbank&log$=prottop&blast_rank=50&RID=S1DBJNWX013","XP_015898710.1")
Enolase [Corchorus olitorius]	Corchorus olitorius	838	838	0.99	0	92.08	445	https://www.ncbi.nlm.nih.gov/protein/OMO68215.1?report=genbank&log$=prottop&blast_rank=51&RID=S1DBJNWX013","OMO68215.1")
enolase [Capsicum annuum]	Capsicum annuum	838	838	1	0	90.99	444	https://www.ncbi.nlm.nih.gov/protein/XP_016542903.1?report=genbank&log$=prottop&blast_rank=52&RID=S1DBJNWX013","XP_016542903.1")
enolase-like [Solanum verrucosum]	Solanum verrucosum	838	838	1	0	91.22	444	https://www.ncbi.nlm.nih.gov/protein/XP_049360848.1?report=genbank&log$=prottop&blast_rank=53&RID=S1DBJNWX013","XP_049360848.1")
bifunctional enolase 2/transcriptional activator [Salvia splendens]	Salvia splendens	838	838	1	0	90.77	444	https://www.ncbi.nlm.nih.gov/protein/XP_042045975.1?report=genbank&log$=prottop&blast_rank=54&RID=S1DBJNWX013","XP_042045975.1")
PREDICTED: enolase [Ipomoea nil]	Ipomoea nil	837	837	1	0	91.89	444	https://www.ncbi.nlm.nih.gov/protein/XP_019187019.1?report=genbank&log$=prottop&blast_rank=55&RID=S1DBJNWX013","XP_019187019.1")
enolase-like [Telopea speciosissima]	Telopea speciosissima	837	837	1	0	91.44	444	https://www.ncbi.nlm.nih.gov/protein/XP_043703452.1?report=genbank&log$=prottop&blast_rank=56&RID=S1DBJNWX013","XP_043703452.1")
enolase [Hibiscus syriacus]	Hibiscus syriacus	836	836	0.99	0	91.65	445	https://www.ncbi.nlm.nih.gov/protein/XP_038990751.1?report=genbank&log$=prottop&blast_rank=57&RID=S1DBJNWX013","XP_038990751.1")
Enolase [Datura stramonium]	Datura stramonium	836	836	1	0	91.22	444	https://www.ncbi.nlm.nih.gov/protein/MCE2055101.1?report=genbank&log$=prottop&blast_rank=58&RID=S1DBJNWX013","MCE2055101.1")
enolase-like [Durio zibethinus]	Durio zibethinus	836	836	0.99	0	92.08	456	https://www.ncbi.nlm.nih.gov/protein/XP_022746827.1?report=genbank&log$=prottop&blast_rank=59&RID=S1DBJNWX013","XP_022746827.1")
hypothetical protein L6452_08747 [Arctium lappa]	Arctium lappa	835	835	1	0	91.22	444	https://www.ncbi.nlm.nih.gov/protein/KAI3746319.1?report=genbank&log$=prottop&blast_rank=60&RID=S1DBJNWX013","KAI3746319.1")
enolase-like [Salvia splendens]	Salvia splendens	835	835	1	0	91.22	444	https://www.ncbi.nlm.nih.gov/protein/XP_042042644.1?report=genbank&log$=prottop&blast_rank=61&RID=S1DBJNWX013","XP_042042644.1")
enolase 2 [Ambrosia artemisiifolia]	Ambrosia artemisiifolia	835	835	1	0	91.24	445	https://www.ncbi.nlm.nih.gov/protein/ANZ22900.1?report=genbank&log$=prottop&blast_rank=62&RID=S1DBJNWX013","ANZ22900.1")
bifunctional enolase 2/transcriptional activator [Salvia hispanica]	Salvia hispanica	835	835	1	0	90.32	444	https://www.ncbi.nlm.nih.gov/protein/XP_047980384.1?report=genbank&log$=prottop&blast_rank=63&RID=S1DBJNWX013","XP_047980384.1")
enolase 1-like [Cynara cardunculus var. scolymus]	Cynara cardunculus var. scolymus	835	835	1	0	91.44	444	https://www.ncbi.nlm.nih.gov/protein/XP_024969766.1?report=genbank&log$=prottop&blast_rank=64&RID=S1DBJNWX013","XP_024969766.1")
enolase [Momordica charantia]	Momordica charantia	835	835	1	0	91.22	444	https://www.ncbi.nlm.nih.gov/protein/XP_022143756.1?report=genbank&log$=prottop&blast_rank=65&RID=S1DBJNWX013","XP_022143756.1")
enolase [Punica granatum]	Punica granatum	834	834	1	0	91.44	444	https://www.ncbi.nlm.nih.gov/protein/XP_031396642.1?report=genbank&log$=prottop&blast_rank=66&RID=S1DBJNWX013","XP_031396642.1")
PREDICTED: enolase-like isoform X1 [Gossypium raimondii]	Gossypium raimondii	833	833	0.99	0	91.89	446	https://www.ncbi.nlm.nih.gov/protein/XP_012485849.1?report=genbank&log$=prottop&blast_rank=67&RID=S1DBJNWX013","XP_012485849.1")
hypothetical protein L1987_46062 [Smallanthus sonchifolius]	Smallanthus sonchifolius	833	833	1	0	91.24	445	https://www.ncbi.nlm.nih.gov/protein/KAI3776286.1?report=genbank&log$=prottop&blast_rank=68&RID=S1DBJNWX013","KAI3776286.1")
hypothetical protein FEM48_Zijuj12G0054700 [Ziziphus jujuba var. spinosa]	Ziziphus jujuba var. spinosa	833	833	1	0	90.89	450	https://www.ncbi.nlm.nih.gov/protein/KAH7512100.1?report=genbank&log$=prottop&blast_rank=69&RID=S1DBJNWX013","KAH7512100.1")
hypothetical protein F0562_016830 [Nyssa sinensis]	Nyssa sinensis	832	832	1	0	90.99	444	https://www.ncbi.nlm.nih.gov/protein/KAA8516664.1?report=genbank&log$=prottop&blast_rank=70&RID=S1DBJNWX013","KAA8516664.1")
hypothetical protein L1987_65073 [Smallanthus sonchifolius]	Smallanthus sonchifolius	832	832	1	0	91.01	445	https://www.ncbi.nlm.nih.gov/protein/KAI3725290.1?report=genbank&log$=prottop&blast_rank=71&RID=S1DBJNWX013","KAI3725290.1")
enolase 1-like [Macadamia integrifolia]	Macadamia integrifolia	832	832	1	0	90.99	444	https://www.ncbi.nlm.nih.gov/protein/XP_042491850.1?report=genbank&log$=prottop&blast_rank=72&RID=S1DBJNWX013","XP_042491850.1")
bifunctional enolase 2/transcriptional activator-like [Salvia splendens]	Salvia splendens	832	832	1	0	90.09	444	https://www.ncbi.nlm.nih.gov/protein/XP_041998178.1?report=genbank&log$=prottop&blast_rank=73&RID=S1DBJNWX013","XP_041998178.1")
PREDICTED: enolase [Prunus mume]	Prunus mume	832	832	1	0	90.77	444	https://www.ncbi.nlm.nih.gov/protein/XP_008241309.1?report=genbank&log$=prottop&blast_rank=74&RID=S1DBJNWX013","XP_008241309.1")
enolase-like [Hibiscus syriacus]	Hibiscus syriacus	832	832	0.99	0	91.42	445	https://www.ncbi.nlm.nih.gov/protein/XP_039015486.1?report=genbank&log$=prottop&blast_rank=75&RID=S1DBJNWX013","XP_039015486.1")
hypothetical protein J1N35_017532 [Gossypium stocksii]	Gossypium stocksii	832	832	0.99	0	91.44	446	https://www.ncbi.nlm.nih.gov/protein/KAH1090275.1?report=genbank&log$=prottop&blast_rank=76&RID=S1DBJNWX013","KAH1090275.1")
hypothetical protein L1987_65074 [Smallanthus sonchifolius]	Smallanthus sonchifolius	831	831	1	0	91.01	507	https://www.ncbi.nlm.nih.gov/protein/KAI3725291.1?report=genbank&log$=prottop&blast_rank=77&RID=S1DBJNWX013","KAI3725291.1")
hypothetical protein GBA52_023714 [Prunus armeniaca]	Prunus armeniaca	831	831	1	0	90.54	444	https://www.ncbi.nlm.nih.gov/protein/KAH0971558.1?report=genbank&log$=prottop&blast_rank=78&RID=S1DBJNWX013","KAH0971558.1")
Enolase 1 [Camellia lanceoleosa]	Camellia lanceoleosa	831	831	1	0	89.86	444	https://www.ncbi.nlm.nih.gov/protein/KAI8013927.1?report=genbank&log$=prottop&blast_rank=79&RID=S1DBJNWX013","KAI8013927.1")
enolase-like [Hibiscus syriacus]	Hibiscus syriacus	831	831	0.99	0	91.18	445	https://www.ncbi.nlm.nih.gov/protein/XP_039068334.1?report=genbank&log$=prottop&blast_rank=80&RID=S1DBJNWX013","XP_039068334.1")
enolase 1 [Helianthus annuus]	Helianthus annuus	831	831	1	0	90.79	445	https://www.ncbi.nlm.nih.gov/protein/XP_021970736.1?report=genbank&log$=prottop&blast_rank=81&RID=S1DBJNWX013","XP_021970736.1")
enolase [Cucurbita moschata]	Cucurbita moschata	830	830	1	0	90.99	444	https://www.ncbi.nlm.nih.gov/protein/XP_022925911.1?report=genbank&log$=prottop&blast_rank=82&RID=S1DBJNWX013","XP_022925911.1")
enolase [Durio zibethinus]	Durio zibethinus	830	830	0.99	0	91.18	445	https://www.ncbi.nlm.nih.gov/protein/XP_022767174.1?report=genbank&log$=prottop&blast_rank=83&RID=S1DBJNWX013","XP_022767174.1")
enolase [Prunus persica]	Prunus persica	830	830	1	0	90.54	444	https://www.ncbi.nlm.nih.gov/protein/XP_007202055.1?report=genbank&log$=prottop&blast_rank=84&RID=S1DBJNWX013","XP_007202055.1")
hypothetical protein L1887_06653 [Cichorium endivia]	Cichorium endivia	830	830	1	0	90.79	445	https://www.ncbi.nlm.nih.gov/protein/KAI3518187.1?report=genbank&log$=prottop&blast_rank=85&RID=S1DBJNWX013","KAI3518187.1")
hypothetical protein AQUCO_01900039v1 [Aquilegia coerulea]	Aquilegia coerulea	830	830	1	0	89.41	444	https://www.ncbi.nlm.nih.gov/protein/PIA43385.1?report=genbank&log$=prottop&blast_rank=86&RID=S1DBJNWX013","PIA43385.1")
hypothetical protein DM860_003328 [Cuscuta australis]	Cuscuta australis	830	830	1	0	90.32	444	https://www.ncbi.nlm.nih.gov/protein/RAL44569.1?report=genbank&log$=prottop&blast_rank=87&RID=S1DBJNWX013","RAL44569.1")
enolase [Jatropha curcas]	Jatropha curcas	829	829	1	0	91.69	445	https://www.ncbi.nlm.nih.gov/protein/XP_012090397.1?report=genbank&log$=prottop&blast_rank=88&RID=S1DBJNWX013","XP_012090397.1")
enolase [Prunus avium]	Prunus avium	829	829	1	0	90.54	444	https://www.ncbi.nlm.nih.gov/protein/XP_021810141.1?report=genbank&log$=prottop&blast_rank=89&RID=S1DBJNWX013","XP_021810141.1")
enolase-like isoform X1 [Hibiscus syriacus]	Hibiscus syriacus	829	829	0.99	0	91.89	446	https://www.ncbi.nlm.nih.gov/protein/XP_039042822.1?report=genbank&log$=prottop&blast_rank=90&RID=S1DBJNWX013","XP_039042822.1")
enolase-like isoform X1 [Salvia hispanica]	Salvia hispanica	829	829	1	0	87.15	467	https://www.ncbi.nlm.nih.gov/protein/XP_047972650.1?report=genbank&log$=prottop&blast_rank=91&RID=S1DBJNWX013","XP_047972650.1")
hypothetical protein BT93_A0998 [Corymbia citriodora subsp. variegata]	Corymbia citriodora subsp. variegata	829	829	1	0	90.99	444	https://www.ncbi.nlm.nih.gov/protein/KAF8042534.1?report=genbank&log$=prottop&blast_rank=92&RID=S1DBJNWX013","KAF8042534.1")
enolase [Benincasa hispida]	Benincasa hispida	829	829	1	0	90.99	444	https://www.ncbi.nlm.nih.gov/protein/XP_038883234.1?report=genbank&log$=prottop&blast_rank=93&RID=S1DBJNWX013","XP_038883234.1")
enolase-like [Cucurbita maxima]	Cucurbita maxima	828	828	1	0	90.54	444	https://www.ncbi.nlm.nih.gov/protein/XP_022972676.1?report=genbank&log$=prottop&blast_rank=94&RID=S1DBJNWX013","XP_022972676.1")
Enolase 2 [Gossypium arboreum]	Gossypium arboreum	828	828	0.99	0	90.99	446	https://www.ncbi.nlm.nih.gov/protein/KHF99213.1?report=genbank&log$=prottop&blast_rank=95&RID=S1DBJNWX013","KHF99213.1")
hypothetical protein J1N35_006368 [Gossypium stocksii]	Gossypium stocksii	828	828	0.99	0	91.42	445	https://www.ncbi.nlm.nih.gov/protein/KAH1123208.1?report=genbank&log$=prottop&blast_rank=96&RID=S1DBJNWX013","KAH1123208.1")
enolase 2 [Hevea brasiliensis]	Hevea brasiliensis	828	828	0.99	0	91.63	445	https://www.ncbi.nlm.nih.gov/protein/XP_021644856.1?report=genbank&log$=prottop&blast_rank=97&RID=S1DBJNWX013","XP_021644856.1")
Enolase [Actinidia chinensis var. chinensis]	Actinidia chinensis var. chinensis	828	828	1	0	90.56	445	https://www.ncbi.nlm.nih.gov/protein/PSR98337.1?report=genbank&log$=prottop&blast_rank=98&RID=S1DBJNWX013","PSR98337.1")
enolase 1 [Lactuca sativa]	Lactuca sativa	828	828	1	0	90.56	446	https://www.ncbi.nlm.nih.gov/protein/XP_023749741.1?report=genbank&log$=prottop&blast_rank=99&RID=S1DBJNWX013","XP_023749741.1")
enolase-like [Nicotiana tabacum]	Nicotiana tabacum	828	828	1	0	89.64	444	https://www.ncbi.nlm.nih.gov/protein/NP_001312148.1?report=genbank&log$=prottop&blast_rank=100&RID=S1DBJNWX013","NP_001312148.1")

## Sheet: KZV25501.1
S1CXHEPN013-Alignment-Descriptions
Description	Scientific Name	Max Score	Total Score	Query Cover	E value	Per. ident	Acc. Len	Accession
UDP-D-apiose/UDP-D-xylose synthase 2 [Dorcoceras hygrometricum]	Dorcoceras hygrometricum	812	812	1	0	100	390	https://www.ncbi.nlm.nih.gov/protein/KZV25501.1?report=genbank&log$=prottop&blast_rank=1&RID=S1CXHEPN013","KZV25501.1")
UDP-D-apiose/UDP-D-xylose synthase 2 [Striga hermonthica]	Striga hermonthica	759	759	0.99	0	93.32	387	https://www.ncbi.nlm.nih.gov/protein/CAA0813513.1?report=genbank&log$=prottop&blast_rank=2&RID=S1CXHEPN013","CAA0813513.1")
UDP-D-apiose/UDP-D-xylose synthase 2-like [Dorcoceras hygrometricum]	Dorcoceras hygrometricum	757	757	0.99	0	92.54	390	https://www.ncbi.nlm.nih.gov/protein/KZV29416.1?report=genbank&log$=prottop&blast_rank=3&RID=S1CXHEPN013","KZV29416.1")
hypothetical protein Pfo_018003 [Paulownia fortunei]	Paulownia fortunei	754	754	0.99	0	93.32	387	https://www.ncbi.nlm.nih.gov/protein/KAI3461340.1?report=genbank&log$=prottop&blast_rank=4&RID=S1CXHEPN013","KAI3461340.1")
UDP-D-apiose/UDP-D-xylose synthase 2-like [Dorcoceras hygrometricum]	Dorcoceras hygrometricum	752	752	0.99	0	92.8	387	https://www.ncbi.nlm.nih.gov/protein/KZV42616.1?report=genbank&log$=prottop&blast_rank=5&RID=S1CXHEPN013","KZV42616.1")
UDP-D-apiose/UDP-D-xylose synthase 2 [Sesamum indicum]	Sesamum indicum	751	751	0.99	0	92.03	387	https://www.ncbi.nlm.nih.gov/protein/XP_011089988.1?report=genbank&log$=prottop&blast_rank=6&RID=S1CXHEPN013","XP_011089988.1")
dTDP-glucose 4-6-dehydratase/UDP-glucuronic acid decarboxylase [Handroanthus impetiginosus]	Handroanthus impetiginosus	750	750	0.99	0	92.8	387	https://www.ncbi.nlm.nih.gov/protein/PIN09899.1?report=genbank&log$=prottop&blast_rank=7&RID=S1CXHEPN013","PIN09899.1")
UDP-D-apiose/UDP-D-xylose synthase 2-like [Dorcoceras hygrometricum]	Dorcoceras hygrometricum	749	749	0.99	0	91	390	https://www.ncbi.nlm.nih.gov/protein/KZV18065.1?report=genbank&log$=prottop&blast_rank=8&RID=S1CXHEPN013","KZV18065.1")
dTDP-glucose 4-6-dehydratase/UDP-glucuronic acid decarboxylase [Handroanthus impetiginosus]	Handroanthus impetiginosus	748	748	0.99	0	92.29	387	https://www.ncbi.nlm.nih.gov/protein/PIN00981.1?report=genbank&log$=prottop&blast_rank=9&RID=S1CXHEPN013","PIN00981.1")
UDP-D-apiose/UDP-D-xylose synthase 2 [Sesamum indicum]	Sesamum indicum	747	747	0.99	0	92.03	387	https://www.ncbi.nlm.nih.gov/protein/XP_011088822.1?report=genbank&log$=prottop&blast_rank=10&RID=S1CXHEPN013","XP_011088822.1")
UDP-D-apiose UDP-D-xylose synthase 2 [Olea europaea subsp. europaea]	Olea europaea subsp. europaea	746	746	0.99	0	91.52	390	https://www.ncbi.nlm.nih.gov/protein/CAA2998703.1?report=genbank&log$=prottop&blast_rank=11&RID=S1CXHEPN013","CAA2998703.1")
UDP-D-apiose/UDP-D-xylose synthase 2 [Andrographis paniculata]	Andrographis paniculata	746	746	0.99	0	90.49	387	https://www.ncbi.nlm.nih.gov/protein/XP_051120852.1?report=genbank&log$=prottop&blast_rank=12&RID=S1CXHEPN013","XP_051120852.1")
UDP-D-apiose/UDP-D-xylose synthase 2 [Olea europaea var. sylvestris]	Olea europaea var. sylvestris	746	746	0.99	0	91.52	390	https://www.ncbi.nlm.nih.gov/protein/XP_022854308.1?report=genbank&log$=prottop&blast_rank=13&RID=S1CXHEPN013","XP_022854308.1")
UDP-D-apiose/UDP-D-xylose synthase 2 [Nicotiana tomentosiformis]	Nicotiana tomentosiformis	745	745	0.99	0	91.21	386	https://www.ncbi.nlm.nih.gov/protein/XP_009622875.1?report=genbank&log$=prottop&blast_rank=14&RID=S1CXHEPN013","XP_009622875.1")
UDP-D-apiose/UDP-D-xylose synthase 2-like [Salvia splendens]	Salvia splendens	744	744	0.99	0	91.52	387	https://www.ncbi.nlm.nih.gov/protein/XP_041990328.1?report=genbank&log$=prottop&blast_rank=15&RID=S1CXHEPN013","XP_041990328.1")
UDP-D-apiose/UDP-D-xylose synthase 2 [Salvia hispanica]	Salvia hispanica	744	744	0.99	0	91.52	387	https://www.ncbi.nlm.nih.gov/protein/XP_047937608.1?report=genbank&log$=prottop&blast_rank=16&RID=S1CXHEPN013","XP_047937608.1")
PREDICTED: UDP-D-apiose/UDP-D-xylose synthase 2 [Nicotiana attenuata]	Nicotiana attenuata	743	743	0.99	0	90.96	386	https://www.ncbi.nlm.nih.gov/protein/XP_019264998.1?report=genbank&log$=prottop&blast_rank=17&RID=S1CXHEPN013","XP_019264998.1")
UDP-d-apiose/UDP-d-xylose synthase 2 [Phtheirospermum japonicum]	Phtheirospermum japonicum	742	742	0.99	0	90.75	387	https://www.ncbi.nlm.nih.gov/protein/GFP98029.1?report=genbank&log$=prottop&blast_rank=18&RID=S1CXHEPN013","GFP98029.1")
UDP-D-apiose UDP-D-xylose synthase 2 [Olea europaea subsp. europaea]	Olea europaea subsp. europaea	742	742	0.99	0	91.77	390	https://www.ncbi.nlm.nih.gov/protein/CAA2966185.1?report=genbank&log$=prottop&blast_rank=19&RID=S1CXHEPN013","CAA2966185.1")
UDP-D-apiose/UDP-D-xylose synthase 2 [Datura stramonium]	Datura stramonium	742	742	0.99	0	90.7	386	https://www.ncbi.nlm.nih.gov/protein/MCD7470304.1?report=genbank&log$=prottop&blast_rank=20&RID=S1CXHEPN013","MCD7470304.1")
UDP-D-apiose/UDP-D-xylose synthase 1-like [Salvia splendens]	Salvia splendens	742	742	0.98	0	91.71	387	https://www.ncbi.nlm.nih.gov/protein/XP_041991229.1?report=genbank&log$=prottop&blast_rank=21&RID=S1CXHEPN013","XP_041991229.1")
UDP-D-apiose/UDP-D-xylose synthase 2 [Ipomoea triloba]	Ipomoea triloba	740	740	0.99	0	91.47	386	https://www.ncbi.nlm.nih.gov/protein/XP_031114215.1?report=genbank&log$=prottop&blast_rank=22&RID=S1CXHEPN013","XP_031114215.1")
PREDICTED: UDP-D-apiose/UDP-D-xylose synthase 2 [Nicotiana sylvestris]	Nicotiana sylvestris	740	740	0.99	0	90.44	386	https://www.ncbi.nlm.nih.gov/protein/XP_009787696.1?report=genbank&log$=prottop&blast_rank=23&RID=S1CXHEPN013","XP_009787696.1")
PREDICTED: UDP-D-apiose/UDP-D-xylose synthase 2-like [Ipomoea nil]	Ipomoea nil	739	739	0.99	0	91.47	386	https://www.ncbi.nlm.nih.gov/protein/XP_019150472.1?report=genbank&log$=prottop&blast_rank=24&RID=S1CXHEPN013","XP_019150472.1")
unnamed protein product [Cuscuta campestris]	Cuscuta campestris	739	739	0.99	0	90.96	386	https://www.ncbi.nlm.nih.gov/protein/VFQ96534.1?report=genbank&log$=prottop&blast_rank=25&RID=S1CXHEPN013","VFQ96534.1")
UDP-D-apiose/UDP-D-xylose synthase 2-like [Ipomoea triloba]	Ipomoea triloba	739	739	0.99	0	90.96	387	https://www.ncbi.nlm.nih.gov/protein/XP_031101482.1?report=genbank&log$=prottop&blast_rank=26&RID=S1CXHEPN013","XP_031101482.1")
PREDICTED: UDP-D-apiose/UDP-D-xylose synthase 2 [Ipomoea nil]	Ipomoea nil	739	739	0.99	0	91.47	386	https://www.ncbi.nlm.nih.gov/protein/XP_019199350.1?report=genbank&log$=prottop&blast_rank=27&RID=S1CXHEPN013","XP_019199350.1")
hypothetical protein BUALT_Bualt13G0065100 [Buddleja alternifolia]	Buddleja alternifolia	738	738	0.99	0	91	388	https://www.ncbi.nlm.nih.gov/protein/KAG8371221.1?report=genbank&log$=prottop&blast_rank=28&RID=S1CXHEPN013","KAG8371221.1")
UDP-D-apiose/UDP-D-xylose synthase 2-like [Nicotiana tomentosiformis]	Nicotiana tomentosiformis	738	738	0.99	0	90.23	387	https://www.ncbi.nlm.nih.gov/protein/XP_009618937.1?report=genbank&log$=prottop&blast_rank=29&RID=S1CXHEPN013","XP_009618937.1")
PREDICTED: UDP-D-apiose/UDP-D-xylose synthase 2-like [Nicotiana sylvestris]	Nicotiana sylvestris	738	738	0.99	0	90.23	387	https://www.ncbi.nlm.nih.gov/protein/XP_009790521.1?report=genbank&log$=prottop&blast_rank=30&RID=S1CXHEPN013","XP_009790521.1")
UDP-D-apiose/UDP-D-xylose synthase 2-like [Salvia splendens]	Salvia splendens	738	738	0.99	0	91	387	https://www.ncbi.nlm.nih.gov/protein/XP_042012275.1?report=genbank&log$=prottop&blast_rank=31&RID=S1CXHEPN013","XP_042012275.1")
hypothetical protein SASPL_101288 [Salvia splendens]	Salvia splendens	738	738	0.98	0	91.45	430	https://www.ncbi.nlm.nih.gov/protein/KAG6436390.1?report=genbank&log$=prottop&blast_rank=32&RID=S1CXHEPN013","KAG6436390.1")
PREDICTED: UDP-D-apiose/UDP-D-xylose synthase 2-like [Nicotiana tabacum]	Nicotiana tabacum	738	738	0.99	0	90.23	387	https://www.ncbi.nlm.nih.gov/protein/XP_016514275.1?report=genbank&log$=prottop&blast_rank=33&RID=S1CXHEPN013","XP_016514275.1")
PREDICTED: UDP-D-apiose/UDP-D-xylose synthase 2-like [Nicotiana attenuata]	Nicotiana attenuata	738	738	0.99	0	90.7	386	https://www.ncbi.nlm.nih.gov/protein/XP_019267061.1?report=genbank&log$=prottop&blast_rank=34&RID=S1CXHEPN013","XP_019267061.1")
UDP-D-apiose/UDP-D-xylose synthase 2-like [Solanum verrucosum]	Solanum verrucosum	738	738	0.99	0	90.7	386	https://www.ncbi.nlm.nih.gov/protein/XP_049343758.1?report=genbank&log$=prottop&blast_rank=35&RID=S1CXHEPN013","XP_049343758.1")
PREDICTED: UDP-D-apiose/UDP-D-xylose synthase 2-like [Nicotiana tabacum]	Nicotiana tabacum	738	738	0.99	0	90.7	386	https://www.ncbi.nlm.nih.gov/protein/XP_016450694.1?report=genbank&log$=prottop&blast_rank=36&RID=S1CXHEPN013","XP_016450694.1")
hypothetical protein H5410_058053 [Solanum commersonii]	Solanum commersonii	738	738	0.99	0	90.18	386	https://www.ncbi.nlm.nih.gov/protein/KAG5577919.1?report=genbank&log$=prottop&blast_rank=37&RID=S1CXHEPN013","KAG5577919.1")
UDP-D-apiose/UDP-D-xylose synthase 2 [Camellia sinensis]	Camellia sinensis	737	737	0.99	0	90.21	389	https://www.ncbi.nlm.nih.gov/protein/XP_028090926.1?report=genbank&log$=prottop&blast_rank=38&RID=S1CXHEPN013","XP_028090926.1")
unnamed protein product [Cuscuta campestris]	Cuscuta campestris	737	737	0.99	0	90.7	386	https://www.ncbi.nlm.nih.gov/protein/VFQ71553.1?report=genbank&log$=prottop&blast_rank=39&RID=S1CXHEPN013","VFQ71553.1")
UDP-D-apiose/UDP-D-xylose synthase 2 [Capsicum baccatum]	Capsicum baccatum	737	737	0.99	0	90.44	386	https://www.ncbi.nlm.nih.gov/protein/PHT30083.1?report=genbank&log$=prottop&blast_rank=40&RID=S1CXHEPN013","PHT30083.1")
hypothetical protein SASPL_104687 [Salvia splendens]	Salvia splendens	737	737	0.98	0	91.45	490	https://www.ncbi.nlm.nih.gov/protein/KAG6433080.1?report=genbank&log$=prottop&blast_rank=41&RID=S1CXHEPN013","KAG6433080.1")
PREDICTED: UDP-D-apiose/UDP-D-xylose synthase 2-like [Nicotiana tabacum]	Nicotiana tabacum	737	737	0.99	0	89.97	387	https://www.ncbi.nlm.nih.gov/protein/XP_016464083.1?report=genbank&log$=prottop&blast_rank=42&RID=S1CXHEPN013","XP_016464083.1")
UDP-D-apiose/UDP-D-xylose synthase 2 [Salvia splendens]	Salvia splendens	737	737	0.98	0	91.45	386	https://www.ncbi.nlm.nih.gov/protein/XP_042050862.1?report=genbank&log$=prottop&blast_rank=43&RID=S1CXHEPN013","XP_042050862.1")
UDP-D-apiose/UDP-D-xylose synthase 2 [Camellia lanceoleosa]	Camellia lanceoleosa	737	737	0.99	0	90.21	389	https://www.ncbi.nlm.nih.gov/protein/KAI7983109.1?report=genbank&log$=prottop&blast_rank=44&RID=S1CXHEPN013","KAI7983109.1")
UDP-D-apiose/UDP-D-xylose synthase 2 [Solanum lycopersicum]	Solanum lycopersicum	737	737	0.99	0	89.92	386	https://www.ncbi.nlm.nih.gov/protein/NP_001296729.1?report=genbank&log$=prottop&blast_rank=45&RID=S1CXHEPN013","NP_001296729.1")
hypothetical protein DM860_006187 [Cuscuta australis]	Cuscuta australis	737	737	0.99	0	90.7	386	https://www.ncbi.nlm.nih.gov/protein/RAL46033.1?report=genbank&log$=prottop&blast_rank=46&RID=S1CXHEPN013","RAL46033.1")
PREDICTED: UDP-D-apiose/UDP-D-xylose synthase 2-like [Ipomoea nil]	Ipomoea nil	736	736	0.99	0	90.7	387	https://www.ncbi.nlm.nih.gov/protein/XP_019161999.1?report=genbank&log$=prottop&blast_rank=47&RID=S1CXHEPN013","XP_019161999.1")
UDP-D-apiose/UDP-D-xylose synthase 2-like [Nicotiana tomentosiformis]	Nicotiana tomentosiformis	736	736	0.99	0	90.44	386	https://www.ncbi.nlm.nih.gov/protein/XP_009593881.1?report=genbank&log$=prottop&blast_rank=48&RID=S1CXHEPN013","XP_009593881.1")
UDP-D-apiose/UDP-D-xylose synthase 1-like [Salvia hispanica]	Salvia hispanica	736	736	0.98	0	90.93	387	https://www.ncbi.nlm.nih.gov/protein/XP_047967323.1?report=genbank&log$=prottop&blast_rank=49&RID=S1CXHEPN013","XP_047967323.1")
hypothetical protein KY289_028365 [Solanum tuberosum]	Solanum tuberosum	736	736	0.99	0	90.7	386	https://www.ncbi.nlm.nih.gov/protein/KAH0659617.1?report=genbank&log$=prottop&blast_rank=50&RID=S1CXHEPN013","KAH0659617.1")
unnamed protein product [Cuscuta campestris]	Cuscuta campestris	736	736	0.99	0	90.44	386	https://www.ncbi.nlm.nih.gov/protein/VFQ67211.1?report=genbank&log$=prottop&blast_rank=51&RID=S1CXHEPN013","VFQ67211.1")
UDP-D-apiose/UDP-D-xylose synthase 2-like [Salvia splendens]	Salvia splendens	736	736	0.99	0	91	386	https://www.ncbi.nlm.nih.gov/protein/XP_042012889.1?report=genbank&log$=prottop&blast_rank=52&RID=S1CXHEPN013","XP_042012889.1")
UDP-D-apiose/UDP-D-xylose synthase 2 [Solanum lycopersicum]	Solanum lycopersicum	736	736	0.99	0	90.44	386	https://www.ncbi.nlm.nih.gov/protein/XP_004241299.1?report=genbank&log$=prottop&blast_rank=53&RID=S1CXHEPN013","XP_004241299.1")
UDP-D-apiose/UDP-D-xylose synthase 2 [Solanum verrucosum]	Solanum verrucosum	736	736	0.99	0	89.92	386	https://www.ncbi.nlm.nih.gov/protein/XP_049353631.1?report=genbank&log$=prottop&blast_rank=54&RID=S1CXHEPN013","XP_049353631.1")
hypothetical protein KY285_008339 [Solanum tuberosum]	Solanum tuberosum	736	736	0.99	0	89.66	386	https://www.ncbi.nlm.nih.gov/protein/KAH0746682.1?report=genbank&log$=prottop&blast_rank=55&RID=S1CXHEPN013","KAH0746682.1")
hypothetical protein KY289_009728 [Solanum tuberosum]	Solanum tuberosum	735	735	0.99	0	89.92	386	https://www.ncbi.nlm.nih.gov/protein/KAH0713769.1?report=genbank&log$=prottop&blast_rank=56&RID=S1CXHEPN013","KAH0713769.1")
UDP-D-apiose/UDP-D-xylose synthase 2 [Abrus precatorius]	Abrus precatorius	735	735	0.99	0	90.75	387	https://www.ncbi.nlm.nih.gov/protein/XP_027339755.1?report=genbank&log$=prottop&blast_rank=57&RID=S1CXHEPN013","XP_027339755.1")
UDP-D-apiose/UDP-D-xylose synthase 2 [Capsicum annuum]	Capsicum annuum	735	735	0.99	0	90.18	386	https://www.ncbi.nlm.nih.gov/protein/XP_016577905.1?report=genbank&log$=prottop&blast_rank=58&RID=S1CXHEPN013","XP_016577905.1")
UDP-D-apiose/UDP-D-xylose synthase 2 [Datura stramonium]	Datura stramonium	735	735	0.99	0	90.18	386	https://www.ncbi.nlm.nih.gov/protein/MCD9560024.1?report=genbank&log$=prottop&blast_rank=59&RID=S1CXHEPN013","MCD9560024.1")
unnamed protein product [Cuscuta campestris]	Cuscuta campestris	735	735	0.99	0	90.44	386	https://www.ncbi.nlm.nih.gov/protein/VFQ82775.1?report=genbank&log$=prottop&blast_rank=60&RID=S1CXHEPN013","VFQ82775.1")
UDP-D-apiose/UDP-D-xylose synthase 2 [Striga hermonthica]	Striga hermonthica	734	734	0.98	0	91.19	388	https://www.ncbi.nlm.nih.gov/protein/CAA0815007.1?report=genbank&log$=prottop&blast_rank=61&RID=S1CXHEPN013","CAA0815007.1")
hypothetical protein KY290_029173 [Solanum tuberosum]	Solanum tuberosum	734	734	0.99	0	90.44	386	https://www.ncbi.nlm.nih.gov/protein/KAH0749941.1?report=genbank&log$=prottop&blast_rank=62&RID=S1CXHEPN013","KAH0749941.1")
PREDICTED: UDP-D-apiose/UDP-D-xylose synthase 2-like [Nicotiana tabacum]	Nicotiana tabacum	734	734	0.99	0	90.18	386	https://www.ncbi.nlm.nih.gov/protein/XP_016441248.1?report=genbank&log$=prottop&blast_rank=63&RID=S1CXHEPN013","XP_016441248.1")
hypothetical protein Vadar_001206 [Vaccinium darrowii]	Vaccinium darrowii	734	734	0.99	0	89.49	392	https://www.ncbi.nlm.nih.gov/protein/KAH7862185.1?report=genbank&log$=prottop&blast_rank=64&RID=S1CXHEPN013","KAH7862185.1")
hypothetical protein H5410_000999 [Solanum commersonii]	Solanum commersonii	734	734	0.99	0	89.41	386	https://www.ncbi.nlm.nih.gov/protein/KAG5629282.1?report=genbank&log$=prottop&blast_rank=65&RID=S1CXHEPN013","KAG5629282.1")
hypothetical protein I3842_13G140700 [Carya illinoinensis]	Carya illinoinensis	734	734	0.99	0	89.97	388	https://www.ncbi.nlm.nih.gov/protein/KAG6682420.1?report=genbank&log$=prottop&blast_rank=66&RID=S1CXHEPN013","KAG6682420.1")
UDP-D-apiose/UDP-D-xylose synthase 2 [Ipomoea pes-caprae]	Ipomoea pes-caprae	734	734	0.99	0	90.96	386	https://www.ncbi.nlm.nih.gov/protein/AWW16485.1?report=genbank&log$=prottop&blast_rank=67&RID=S1CXHEPN013","AWW16485.1")
PREDICTED: UDP-D-apiose/UDP-D-xylose synthase 2-like [Nicotiana attenuata]	Nicotiana attenuata	734	734	0.99	0	89.72	387	https://www.ncbi.nlm.nih.gov/protein/XP_019247307.1?report=genbank&log$=prottop&blast_rank=68&RID=S1CXHEPN013","XP_019247307.1")
UDP-D-apiose/UDP-D-xylose synthase 2 [Carya illinoinensis]	Carya illinoinensis	734	734	0.99	0	89.97	388	https://www.ncbi.nlm.nih.gov/protein/XP_042956992.1?report=genbank&log$=prottop&blast_rank=69&RID=S1CXHEPN013","XP_042956992.1")
bifunctional polymyxin resistance protein ArnA [Striga asiatica]	Striga asiatica	734	734	0.99	0	90.49	387	https://www.ncbi.nlm.nih.gov/protein/GER39718.1?report=genbank&log$=prottop&blast_rank=70&RID=S1CXHEPN013","GER39718.1")
PREDICTED: UDP-D-apiose/UDP-D-xylose synthase 2 [Solanum tuberosum]	Solanum tuberosum	734	734	0.99	0	89.66	386	https://www.ncbi.nlm.nih.gov/protein/XP_006349067.1?report=genbank&log$=prottop&blast_rank=71&RID=S1CXHEPN013","XP_006349067.1")
hypothetical protein EJD97_009244 [Solanum chilense]	Solanum chilense	733	733	0.99	0	89.41	386	https://www.ncbi.nlm.nih.gov/protein/TMW95213.1?report=genbank&log$=prottop&blast_rank=72&RID=S1CXHEPN013","TMW95213.1")
UDP-D-apiose/UDP-D-xylose synthase 2 [Glycine max]	Glycine max	733	733	0.99	0	89.97	387	https://www.ncbi.nlm.nih.gov/protein/XP_003540213.1?report=genbank&log$=prottop&blast_rank=73&RID=S1CXHEPN013","XP_003540213.1")
UDP-D-apiose/UDP-D-xylose synthase 2 [Theobroma cacao]	Theobroma cacao	733	733	0.98	0	91.17	451	https://www.ncbi.nlm.nih.gov/protein/EOY33604.1?report=genbank&log$=prottop&blast_rank=74&RID=S1CXHEPN013","EOY33604.1")
UDP-apiose/xylose synthase [Solanum tuberosum]	Solanum tuberosum	733	733	0.99	0	89.41	386	https://www.ncbi.nlm.nih.gov/protein/NP_001275341.1?report=genbank&log$=prottop&blast_rank=75&RID=S1CXHEPN013","NP_001275341.1")
hypothetical protein SLEP1_g27251 [Shorea leprosula]	Shorea leprosula	733	733	0.99	0	90.77	388	https://www.ncbi.nlm.nih.gov/protein/GKV16635.1?report=genbank&log$=prottop&blast_rank=76&RID=S1CXHEPN013","GKV16635.1")
PREDICTED: UDP-D-apiose/UDP-D-xylose synthase 2-like [Nicotiana sylvestris]	Nicotiana sylvestris	733	733	0.99	0	89.92	386	https://www.ncbi.nlm.nih.gov/protein/XP_009766557.1?report=genbank&log$=prottop&blast_rank=77&RID=S1CXHEPN013","XP_009766557.1")
UDP-D-apiose/UDP-D-xylose synthase 2 [Juglans regia]	Juglans regia	733	733	0.99	0	89.97	388	https://www.ncbi.nlm.nih.gov/protein/XP_018833171.1?report=genbank&log$=prottop&blast_rank=78&RID=S1CXHEPN013","XP_018833171.1")
UDP-D-apiose/UDP-D-xylose synthase 2-like [Ipomoea triloba]	Ipomoea triloba	733	733	0.99	0	90.7	386	https://www.ncbi.nlm.nih.gov/protein/XP_031122907.1?report=genbank&log$=prottop&blast_rank=79&RID=S1CXHEPN013","XP_031122907.1")
PREDICTED: UDP-D-apiose/UDP-D-xylose synthase 2 [Erythranthe guttata]	Erythranthe guttata	733	733	0.99	0	89.72	387	https://www.ncbi.nlm.nih.gov/protein/XP_012837986.1?report=genbank&log$=prottop&blast_rank=80&RID=S1CXHEPN013","XP_012837986.1")
UDP-D-apiose/UDP-D-xylose synthase 2 [Datura stramonium]	Datura stramonium	733	733	0.99	0	90.18	386	https://www.ncbi.nlm.nih.gov/protein/MCD7464183.1?report=genbank&log$=prottop&blast_rank=81&RID=S1CXHEPN013","MCD7464183.1")
hypothetical protein KY284_029525 [Solanum tuberosum]	Solanum tuberosum	733	733	0.99	0	90.44	386	https://www.ncbi.nlm.nih.gov/protein/KAH0664594.1?report=genbank&log$=prottop&blast_rank=82&RID=S1CXHEPN013","KAH0664594.1")
UDP-D-apiose/UDP-D-xylose synthase 2 [Beta vulgaris subsp. vulgaris]	Beta vulgaris subsp. vulgaris	733	733	0.99	0	89.69	389	https://www.ncbi.nlm.nih.gov/protein/XP_010689975.1?report=genbank&log$=prottop&blast_rank=83&RID=S1CXHEPN013","XP_010689975.1")
PREDICTED: UDP-D-apiose/UDP-D-xylose synthase 2-like [Solanum tuberosum]	Solanum tuberosum	733	733	0.99	0	90.44	386	https://www.ncbi.nlm.nih.gov/protein/XP_006347220.1?report=genbank&log$=prottop&blast_rank=84&RID=S1CXHEPN013","XP_006347220.1")
hypothetical protein PHAVU_005G128500g [Phaseolus vulgaris]	Phaseolus vulgaris	733	733	0.99	0	90.49	387	https://www.ncbi.nlm.nih.gov/protein/XP_007150121.1?report=genbank&log$=prottop&blast_rank=85&RID=S1CXHEPN013","XP_007150121.1")
UDP-D-apiose/UDP-D-xylose synthase 2 [Vigna radiata var. radiata]	Vigna radiata var. radiata	732	732	0.99	0	90.49	387	https://www.ncbi.nlm.nih.gov/protein/XP_014498252.1?report=genbank&log$=prottop&blast_rank=86&RID=S1CXHEPN013","XP_014498252.1")
Bifunctional polymyxin resistance protein ArnA [Glycine soja]	Glycine soja	732	732	0.99	0	89.72	387	https://www.ncbi.nlm.nih.gov/protein/KHN27689.1?report=genbank&log$=prottop&blast_rank=87&RID=S1CXHEPN013","KHN27689.1")
UDP-d-apiose/UDP-d-xylose synthase 2 [Phtheirospermum japonicum]	Phtheirospermum japonicum	732	732	0.99	0	89.46	387	https://www.ncbi.nlm.nih.gov/protein/GFP95380.1?report=genbank&log$=prottop&blast_rank=88&RID=S1CXHEPN013","GFP95380.1")
PREDICTED: UDP-D-apiose/UDP-D-xylose synthase 2 [Erythranthe guttata]	Erythranthe guttata	732	732	0.98	0	90.65	387	https://www.ncbi.nlm.nih.gov/protein/XP_012838572.1?report=genbank&log$=prottop&blast_rank=89&RID=S1CXHEPN013","XP_012838572.1")
PREDICTED: UDP-D-apiose/UDP-D-xylose synthase 2 [Theobroma cacao]	Theobroma cacao	732	732	0.98	0	91.17	386	https://www.ncbi.nlm.nih.gov/protein/XP_017983686.1?report=genbank&log$=prottop&blast_rank=90&RID=S1CXHEPN013","XP_017983686.1")
hypothetical protein KY284_000504 [Solanum tuberosum]	Solanum tuberosum	731	731	0.99	0	89.15	386	https://www.ncbi.nlm.nih.gov/protein/KAH0724639.1?report=genbank&log$=prottop&blast_rank=91&RID=S1CXHEPN013","KAH0724639.1")
UDP-D-apiose/UDP-D-xylose synthase 2-like [Solanum verrucosum]	Solanum verrucosum	731	731	0.98	0	89.38	386	https://www.ncbi.nlm.nih.gov/protein/XP_049360686.1?report=genbank&log$=prottop&blast_rank=92&RID=S1CXHEPN013","XP_049360686.1")
UDP-D-apiose/UDP-D-xylose synthase 2 [Spatholobus suberectus]	Spatholobus suberectus	731	731	0.99	0	89.97	387	https://www.ncbi.nlm.nih.gov/protein/TKY48602.1?report=genbank&log$=prottop&blast_rank=93&RID=S1CXHEPN013","TKY48602.1")
UDP-D-apiose/UDP-D-xylose synthase 2 [Juglans microcarpa x Juglans regia]	Juglans microcarpa x Juglans regia	731	731	0.99	0	89.72	388	https://www.ncbi.nlm.nih.gov/protein/XP_040992965.1?report=genbank&log$=prottop&blast_rank=94&RID=S1CXHEPN013","XP_040992965.1")
hypothetical protein Vadar_005580 [Vaccinium darrowii]	Vaccinium darrowii	731	731	0.99	0	89.43	390	https://www.ncbi.nlm.nih.gov/protein/KAH7836781.1?report=genbank&log$=prottop&blast_rank=95&RID=S1CXHEPN013","KAH7836781.1")
UDP-D-apiose/UDP-D-xylose synthase [Nicotiana benthamiana]	Nicotiana benthamiana	731	731	0.99	0	89.46	387	https://www.ncbi.nlm.nih.gov/protein/AAQ91380.1?report=genbank&log$=prottop&blast_rank=96&RID=S1CXHEPN013","AAQ91380.1")
UDP-D-apiose/UDP-D-xylose synthase 2 [Cajanus cajan]	Cajanus cajan	731	731	0.99	0	89.97	387	https://www.ncbi.nlm.nih.gov/protein/XP_020230997.1?report=genbank&log$=prottop&blast_rank=97&RID=S1CXHEPN013","XP_020230997.1")
UDP-D-apiose/UDP-D-xylose synthase 2-like [Carya illinoinensis]	Carya illinoinensis	731	731	0.99	0	89.72	388	https://www.ncbi.nlm.nih.gov/protein/XP_042959621.1?report=genbank&log$=prottop&blast_rank=98&RID=S1CXHEPN013","XP_042959621.1")
UDP-D-apiose/UDP-D-xylose synthase 2 [Chenopodium quinoa]	Chenopodium quinoa	731	731	0.99	0	89.43	388	https://www.ncbi.nlm.nih.gov/protein/XP_021767383.1?report=genbank&log$=prottop&blast_rank=99&RID=S1CXHEPN013","XP_021767383.1")
hypothetical protein SASPL_119471 [Salvia splendens]	Salvia splendens	731	731	0.99	0	89.46	441	https://www.ncbi.nlm.nih.gov/protein/KAG6417317.1?report=genbank&log$=prottop&blast_rank=100&RID=S1CXHEPN013","KAG6417317.1")

## Sheet: KZV29416.1
S1D4NTAA016-Alignment-Descriptions
Description	Scientific Name	Max Score	Total Score	Query Cover	E value	Per. ident	Acc. Len	Accession
UDP-D-apiose/UDP-D-xylose synthase 2-like [Dorcoceras hygrometricum]	Dorcoceras hygrometricum	811	811	1	0	100	390	https://www.ncbi.nlm.nih.gov/protein/KZV29416.1?report=genbank&log$=prottop&blast_rank=1&RID=S1D4NTAA016","KZV29416.1")
UDP-D-apiose/UDP-D-xylose synthase 2-like [Dorcoceras hygrometricum]	Dorcoceras hygrometricum	799	799	1	0	98.21	390	https://www.ncbi.nlm.nih.gov/protein/KZV18065.1?report=genbank&log$=prottop&blast_rank=2&RID=S1D4NTAA016","KZV18065.1")
UDP-D-apiose/UDP-D-xylose synthase 2 [Dorcoceras hygrometricum]	Dorcoceras hygrometricum	757	757	0.99	0	92.54	390	https://www.ncbi.nlm.nih.gov/protein/KZV25501.1?report=genbank&log$=prottop&blast_rank=3&RID=S1D4NTAA016","KZV25501.1")
dTDP-glucose 4-6-dehydratase/UDP-glucuronic acid decarboxylase [Handroanthus impetiginosus]	Handroanthus impetiginosus	756	756	1	0	92.82	387	https://www.ncbi.nlm.nih.gov/protein/PIN09899.1?report=genbank&log$=prottop&blast_rank=4&RID=S1D4NTAA016","PIN09899.1")
hypothetical protein Pfo_018003 [Paulownia fortunei]	Paulownia fortunei	753	753	1	0	92.31	387	https://www.ncbi.nlm.nih.gov/protein/KAI3461340.1?report=genbank&log$=prottop&blast_rank=5&RID=S1D4NTAA016","KAI3461340.1")
UDP-D-apiose UDP-D-xylose synthase 2 [Olea europaea subsp. europaea]	Olea europaea subsp. europaea	753	753	1	0	91.54	390	https://www.ncbi.nlm.nih.gov/protein/CAA2998703.1?report=genbank&log$=prottop&blast_rank=6&RID=S1D4NTAA016","CAA2998703.1")
UDP-D-apiose/UDP-D-xylose synthase 2 [Sesamum indicum]	Sesamum indicum	752	752	1	0	92.05	387	https://www.ncbi.nlm.nih.gov/protein/XP_011089988.1?report=genbank&log$=prottop&blast_rank=7&RID=S1D4NTAA016","XP_011089988.1")
UDP-D-apiose/UDP-D-xylose synthase 2 [Olea europaea var. sylvestris]	Olea europaea var. sylvestris	751	751	1	0	91.54	390	https://www.ncbi.nlm.nih.gov/protein/XP_022854308.1?report=genbank&log$=prottop&blast_rank=8&RID=S1D4NTAA016","XP_022854308.1")
UDP-D-apiose/UDP-D-xylose synthase 2-like [Dorcoceras hygrometricum]	Dorcoceras hygrometricum	750	750	1	0	91.54	387	https://www.ncbi.nlm.nih.gov/protein/KZV42616.1?report=genbank&log$=prottop&blast_rank=9&RID=S1D4NTAA016","KZV42616.1")
UDP-D-apiose/UDP-D-xylose synthase 2 [Striga hermonthica]	Striga hermonthica	749	749	1	0	91.79	387	https://www.ncbi.nlm.nih.gov/protein/CAA0813513.1?report=genbank&log$=prottop&blast_rank=10&RID=S1D4NTAA016","CAA0813513.1")
UDP-D-apiose/UDP-D-xylose synthase 2 [Sesamum indicum]	Sesamum indicum	748	748	1	0	91.54	387	https://www.ncbi.nlm.nih.gov/protein/XP_011088822.1?report=genbank&log$=prottop&blast_rank=11&RID=S1D4NTAA016","XP_011088822.1")
dTDP-glucose 4-6-dehydratase/UDP-glucuronic acid decarboxylase [Handroanthus impetiginosus]	Handroanthus impetiginosus	748	748	1	0	92.05	387	https://www.ncbi.nlm.nih.gov/protein/PIN00981.1?report=genbank&log$=prottop&blast_rank=12&RID=S1D4NTAA016","PIN00981.1")
UDP-D-apiose/UDP-D-xylose synthase 2-like [Salvia hispanica]	Salvia hispanica	747	747	1	0	91.03	386	https://www.ncbi.nlm.nih.gov/protein/XP_047971271.1?report=genbank&log$=prottop&blast_rank=13&RID=S1D4NTAA016","XP_047971271.1")
hypothetical protein SASPL_119471 [Salvia splendens]	Salvia splendens	746	746	1	0	91.03	441	https://www.ncbi.nlm.nih.gov/protein/KAG6417317.1?report=genbank&log$=prottop&blast_rank=14&RID=S1D4NTAA016","KAG6417317.1")
UDP-D-apiose/UDP-D-xylose synthase 2-like [Salvia splendens]	Salvia splendens	745	745	1	0	90.77	386	https://www.ncbi.nlm.nih.gov/protein/XP_041993900.1?report=genbank&log$=prottop&blast_rank=15&RID=S1D4NTAA016","XP_041993900.1")
UDP-D-apiose/UDP-D-xylose synthase 2-like [Salvia splendens]	Salvia splendens	745	745	1	0	91.03	386	https://www.ncbi.nlm.nih.gov/protein/XP_042068151.1?report=genbank&log$=prottop&blast_rank=16&RID=S1D4NTAA016","XP_042068151.1")
hypothetical protein SASPL_101288 [Salvia splendens]	Salvia splendens	744	744	1	0	90.51	430	https://www.ncbi.nlm.nih.gov/protein/KAG6436390.1?report=genbank&log$=prottop&blast_rank=17&RID=S1D4NTAA016","KAG6436390.1")
UDP-D-apiose/UDP-D-xylose synthase 2-like [Salvia splendens]	Salvia splendens	744	744	1	0	90.77	387	https://www.ncbi.nlm.nih.gov/protein/XP_041990328.1?report=genbank&log$=prottop&blast_rank=18&RID=S1D4NTAA016","XP_041990328.1")
UDP-D-apiose UDP-D-xylose synthase 2 [Olea europaea subsp. europaea]	Olea europaea subsp. europaea	744	744	1	0	91.28	390	https://www.ncbi.nlm.nih.gov/protein/CAA2966185.1?report=genbank&log$=prottop&blast_rank=19&RID=S1D4NTAA016","CAA2966185.1")
UDP-D-apiose/UDP-D-xylose synthase 2 [Camellia sinensis]	Camellia sinensis	743	743	0.99	0	90.49	389	https://www.ncbi.nlm.nih.gov/protein/XP_028090926.1?report=genbank&log$=prottop&blast_rank=20&RID=S1D4NTAA016","XP_028090926.1")
UDP-D-apiose/UDP-D-xylose synthase 2 [Salvia splendens]	Salvia splendens	743	743	1	0	90.51	386	https://www.ncbi.nlm.nih.gov/protein/XP_042050862.1?report=genbank&log$=prottop&blast_rank=21&RID=S1D4NTAA016","XP_042050862.1")
UDP-D-apiose/UDP-D-xylose synthase 2 [Glycine max]	Glycine max	743	743	1	0	90.51	387	https://www.ncbi.nlm.nih.gov/protein/XP_003540213.1?report=genbank&log$=prottop&blast_rank=22&RID=S1D4NTAA016","XP_003540213.1")
PREDICTED: UDP-D-apiose/UDP-D-xylose synthase 2 [Ipomoea nil]	Ipomoea nil	743	743	0.99	0	91.73	386	https://www.ncbi.nlm.nih.gov/protein/XP_019199350.1?report=genbank&log$=prottop&blast_rank=23&RID=S1D4NTAA016","XP_019199350.1")
UDP-D-apiose/UDP-D-xylose synthase 2 [Salvia hispanica]	Salvia hispanica	743	743	1	0	90.51	387	https://www.ncbi.nlm.nih.gov/protein/XP_047937608.1?report=genbank&log$=prottop&blast_rank=24&RID=S1D4NTAA016","XP_047937608.1")
UDP-d-apiose/UDP-d-xylose synthase 2 [Phtheirospermum japonicum]	Phtheirospermum japonicum	743	743	1	0	90	387	https://www.ncbi.nlm.nih.gov/protein/GFP95380.1?report=genbank&log$=prottop&blast_rank=25&RID=S1D4NTAA016","GFP95380.1")
hypothetical protein DM860_006187 [Cuscuta australis]	Cuscuta australis	742	742	0.99	0	90.21	386	https://www.ncbi.nlm.nih.gov/protein/RAL46033.1?report=genbank&log$=prottop&blast_rank=26&RID=S1D4NTAA016","RAL46033.1")
UDP-D-apiose/UDP-D-xylose synthase 2-like [Salvia splendens]	Salvia splendens	742	742	1	0	90.77	386	https://www.ncbi.nlm.nih.gov/protein/XP_042012889.1?report=genbank&log$=prottop&blast_rank=27&RID=S1D4NTAA016","XP_042012889.1")
Bifunctional polymyxin resistance protein ArnA [Glycine soja]	Glycine soja	741	741	1	0	90.26	387	https://www.ncbi.nlm.nih.gov/protein/KHN27689.1?report=genbank&log$=prottop&blast_rank=28&RID=S1D4NTAA016","KHN27689.1")
UDP-d-apiose/UDP-d-xylose synthase 2 [Phtheirospermum japonicum]	Phtheirospermum japonicum	741	741	1	0	89.74	387	https://www.ncbi.nlm.nih.gov/protein/GFP98029.1?report=genbank&log$=prottop&blast_rank=29&RID=S1D4NTAA016","GFP98029.1")
UDP-D-apiose/UDP-D-xylose synthase 2 [Camellia lanceoleosa]	Camellia lanceoleosa	741	741	0.99	0	90.23	389	https://www.ncbi.nlm.nih.gov/protein/KAI7983109.1?report=genbank&log$=prottop&blast_rank=30&RID=S1D4NTAA016","KAI7983109.1")
unnamed protein product [Cuscuta campestris]	Cuscuta campestris	741	741	0.99	0	89.95	386	https://www.ncbi.nlm.nih.gov/protein/VFQ82775.1?report=genbank&log$=prottop&blast_rank=31&RID=S1D4NTAA016","VFQ82775.1")
hypothetical protein F0562_001933 [Nyssa sinensis]	Nyssa sinensis	741	741	0.99	0	90.75	435	https://www.ncbi.nlm.nih.gov/protein/KAA8550249.1?report=genbank&log$=prottop&blast_rank=32&RID=S1D4NTAA016","KAA8550249.1")
hypothetical protein SASPL_104687 [Salvia splendens]	Salvia splendens	740	740	0.99	0	90.7	490	https://www.ncbi.nlm.nih.gov/protein/KAG6433080.1?report=genbank&log$=prottop&blast_rank=33&RID=S1D4NTAA016","KAG6433080.1")
UDP-D-apiose/UDP-D-xylose synthase 2 [Abrus precatorius]	Abrus precatorius	740	740	1	0	90.77	387	https://www.ncbi.nlm.nih.gov/protein/XP_027339755.1?report=genbank&log$=prottop&blast_rank=34&RID=S1D4NTAA016","XP_027339755.1")
UDP-D-apiose/UDP-D-xylose synthase 2 [Senna tora]	Senna tora	740	740	0.99	0	91	388	https://www.ncbi.nlm.nih.gov/protein/KAF7823292.1?report=genbank&log$=prottop&blast_rank=35&RID=S1D4NTAA016","KAF7823292.1")
unnamed protein product [Cuscuta campestris]	Cuscuta campestris	739	739	0.99	0	89.95	386	https://www.ncbi.nlm.nih.gov/protein/VFQ96534.1?report=genbank&log$=prottop&blast_rank=36&RID=S1D4NTAA016","VFQ96534.1")
UDP-D-apiose/UDP-D-xylose synthase 2 [Beta vulgaris subsp. vulgaris]	Beta vulgaris subsp. vulgaris	739	739	0.99	0	89.72	389	https://www.ncbi.nlm.nih.gov/protein/XP_010689975.1?report=genbank&log$=prottop&blast_rank=37&RID=S1D4NTAA016","XP_010689975.1")
UDP-D-apiose/UDP-D-xylose synthase 2 [Senna tora]	Senna tora	739	739	0.99	0	90.75	388	https://www.ncbi.nlm.nih.gov/protein/KAF7823294.1?report=genbank&log$=prottop&blast_rank=38&RID=S1D4NTAA016","KAF7823294.1")
UDP-D-apiose/UDP-D-xylose synthase 2 [Spatholobus suberectus]	Spatholobus suberectus	739	739	1	0	90.51	387	https://www.ncbi.nlm.nih.gov/protein/TKY48602.1?report=genbank&log$=prottop&blast_rank=39&RID=S1D4NTAA016","TKY48602.1")
UDP-D-apiose/UDP-D-xylose synthase 2 [Ipomoea triloba]	Ipomoea triloba	739	739	0.99	0	91.24	386	https://www.ncbi.nlm.nih.gov/protein/XP_031114215.1?report=genbank&log$=prottop&blast_rank=40&RID=S1D4NTAA016","XP_031114215.1")
UDP-D-apiose/UDP-D-xylose synthase 2-like [Ipomoea triloba]	Ipomoea triloba	739	739	0.99	0	90.46	387	https://www.ncbi.nlm.nih.gov/protein/XP_031101482.1?report=genbank&log$=prottop&blast_rank=41&RID=S1D4NTAA016","XP_031101482.1")
PREDICTED: UDP-D-apiose/UDP-D-xylose synthase 2-like [Nicotiana attenuata]	Nicotiana attenuata	739	739	0.99	0	90.44	386	https://www.ncbi.nlm.nih.gov/protein/XP_019267061.1?report=genbank&log$=prottop&blast_rank=42&RID=S1D4NTAA016","XP_019267061.1")
hypothetical protein BUALT_Bualt13G0065100 [Buddleja alternifolia]	Buddleja alternifolia	739	739	1	0	90.26	388	https://www.ncbi.nlm.nih.gov/protein/KAG8371221.1?report=genbank&log$=prottop&blast_rank=43&RID=S1D4NTAA016","KAG8371221.1")
hypothetical protein Vadar_001206 [Vaccinium darrowii]	Vaccinium darrowii	738	738	0.99	0	88.69	392	https://www.ncbi.nlm.nih.gov/protein/KAH7862185.1?report=genbank&log$=prottop&blast_rank=44&RID=S1D4NTAA016","KAH7862185.1")
hypothetical protein PHAVU_005G128500g [Phaseolus vulgaris]	Phaseolus vulgaris	738	738	1	0	90.26	387	https://www.ncbi.nlm.nih.gov/protein/XP_007150121.1?report=genbank&log$=prottop&blast_rank=45&RID=S1D4NTAA016","XP_007150121.1")
UDP-D-apiose/UDP-D-xylose synthase 1-like [Salvia splendens]	Salvia splendens	738	738	1	0	89.49	387	https://www.ncbi.nlm.nih.gov/protein/XP_041991229.1?report=genbank&log$=prottop&blast_rank=46&RID=S1D4NTAA016","XP_041991229.1")
UDP-D-apiose/UDP-D-xylose synthase 2 [Vigna radiata var. radiata]	Vigna radiata var. radiata	737	737	1	0	90.51	387	https://www.ncbi.nlm.nih.gov/protein/XP_014498252.1?report=genbank&log$=prottop&blast_rank=47&RID=S1D4NTAA016","XP_014498252.1")
PREDICTED: UDP-D-apiose/UDP-D-xylose synthase 2-like [Ipomoea nil]	Ipomoea nil	737	737	0.99	0	90.21	387	https://www.ncbi.nlm.nih.gov/protein/XP_019161999.1?report=genbank&log$=prottop&blast_rank=48&RID=S1D4NTAA016","XP_019161999.1")
PREDICTED: UDP-D-apiose/UDP-D-xylose synthase 2 [Nicotiana attenuata]	Nicotiana attenuata	737	737	0.99	0	89.92	386	https://www.ncbi.nlm.nih.gov/protein/XP_019264998.1?report=genbank&log$=prottop&blast_rank=49&RID=S1D4NTAA016","XP_019264998.1")
UDP-D-apiose/UDP-D-xylose synthase 2 [Capsicum baccatum]	Capsicum baccatum	737	737	0.99	0	89.92	386	https://www.ncbi.nlm.nih.gov/protein/PHT30083.1?report=genbank&log$=prottop&blast_rank=50&RID=S1D4NTAA016","PHT30083.1")
PREDICTED: UDP-D-apiose/UDP-D-xylose synthase 2-like [Nicotiana tabacum]	Nicotiana tabacum	737	737	0.99	0	90.18	386	https://www.ncbi.nlm.nih.gov/protein/XP_016450694.1?report=genbank&log$=prottop&blast_rank=51&RID=S1D4NTAA016","XP_016450694.1")
UDP-D-apiose/UDP-D-xylose synthase 2 [Juglans regia]	Juglans regia	737	737	1	0	89.49	388	https://www.ncbi.nlm.nih.gov/protein/XP_018833171.1?report=genbank&log$=prottop&blast_rank=52&RID=S1D4NTAA016","XP_018833171.1")
hypothetical protein I3842_13G140700 [Carya illinoinensis]	Carya illinoinensis	736	736	1	0	89.49	388	https://www.ncbi.nlm.nih.gov/protein/KAG6682420.1?report=genbank&log$=prottop&blast_rank=53&RID=S1D4NTAA016","KAG6682420.1")
UDP-D-apiose/UDP-D-xylose synthase 2-like [Nicotiana tomentosiformis]	Nicotiana tomentosiformis	736	736	0.99	0	90.18	386	https://www.ncbi.nlm.nih.gov/protein/XP_009593881.1?report=genbank&log$=prottop&blast_rank=54&RID=S1D4NTAA016","XP_009593881.1")
PREDICTED: UDP-D-apiose/UDP-D-xylose synthase 2-like [Nicotiana tabacum]	Nicotiana tabacum	736	736	0.99	0	89.92	386	https://www.ncbi.nlm.nih.gov/protein/XP_016441248.1?report=genbank&log$=prottop&blast_rank=55&RID=S1D4NTAA016","XP_016441248.1")
unnamed protein product [Cuscuta campestris]	Cuscuta campestris	736	736	0.99	0	89.43	386	https://www.ncbi.nlm.nih.gov/protein/VFQ71553.1?report=genbank&log$=prottop&blast_rank=56&RID=S1D4NTAA016","VFQ71553.1")
UDP-D-apiose/UDP-D-xylose synthase 2 [Theobroma cacao]	Theobroma cacao	736	736	1	0	90.51	451	https://www.ncbi.nlm.nih.gov/protein/EOY33604.1?report=genbank&log$=prottop&blast_rank=57&RID=S1D4NTAA016","EOY33604.1")
PREDICTED: UDP-D-apiose/UDP-D-xylose synthase 2 [Vigna angularis]	Vigna angularis	736	736	1	0	90.26	387	https://www.ncbi.nlm.nih.gov/protein/XP_017425852.1?report=genbank&log$=prottop&blast_rank=58&RID=S1D4NTAA016","XP_017425852.1")
UDP-D-apiose/UDP-D-xylose synthase 2 [Andrographis paniculata]	Andrographis paniculata	736	736	1	0	88.72	387	https://www.ncbi.nlm.nih.gov/protein/XP_051120852.1?report=genbank&log$=prottop&blast_rank=59&RID=S1D4NTAA016","XP_051120852.1")
UDP-D-apiose/UDP-D-xylose synthase 2-like [Carya illinoinensis]	Carya illinoinensis	735	735	1	0	89.23	388	https://www.ncbi.nlm.nih.gov/protein/XP_042959621.1?report=genbank&log$=prottop&blast_rank=60&RID=S1D4NTAA016","XP_042959621.1")
UDP-D-apiose/UDP-D-xylose synthase 2 [Carya illinoinensis]	Carya illinoinensis	735	735	1	0	89.49	388	https://www.ncbi.nlm.nih.gov/protein/XP_042956992.1?report=genbank&log$=prottop&blast_rank=61&RID=S1D4NTAA016","XP_042956992.1")
UDP-D-apiose/UDP-D-xylose synthase 2 [Juglans microcarpa x Juglans regia]	Juglans microcarpa x Juglans regia	735	735	1	0	89.23	388	https://www.ncbi.nlm.nih.gov/protein/XP_040992965.1?report=genbank&log$=prottop&blast_rank=62&RID=S1D4NTAA016","XP_040992965.1")
UDP-D-apiose/UDP-D-xylose synthase 2-like [Salvia splendens]	Salvia splendens	735	735	1	0	89.74	387	https://www.ncbi.nlm.nih.gov/protein/XP_042012275.1?report=genbank&log$=prottop&blast_rank=63&RID=S1D4NTAA016","XP_042012275.1")
PREDICTED: UDP-D-apiose/UDP-D-xylose synthase 2 [Theobroma cacao]	Theobroma cacao	735	735	1	0	90.51	386	https://www.ncbi.nlm.nih.gov/protein/XP_017983686.1?report=genbank&log$=prottop&blast_rank=64&RID=S1D4NTAA016","XP_017983686.1")
UDP-D-apiose/UDP-D-xylose synthase 2-like [Camellia sinensis]	Camellia sinensis	735	735	0.99	0	89.72	389	https://www.ncbi.nlm.nih.gov/protein/XP_028097413.1?report=genbank&log$=prottop&blast_rank=65&RID=S1D4NTAA016","XP_028097413.1")
UDP-D-apiose/UDP-D-xylose synthase 2 [Cynara cardunculus var. scolymus]	Cynara cardunculus var. scolymus	735	735	0.99	0	89.95	389	https://www.ncbi.nlm.nih.gov/protein/XP_024985124.1?report=genbank&log$=prottop&blast_rank=66&RID=S1D4NTAA016","XP_024985124.1")
UDP-D-apiose/UDP-D-xylose synthase 2-like [Juglans regia]	Juglans regia	734	734	1	0	88.97	388	https://www.ncbi.nlm.nih.gov/protein/XP_035546070.1?report=genbank&log$=prottop&blast_rank=67&RID=S1D4NTAA016","XP_035546070.1")
UDP-D-apiose/UDP-D-xylose synthase 2 [Capsicum annuum]	Capsicum annuum	734	734	0.99	0	89.66	386	https://www.ncbi.nlm.nih.gov/protein/XP_016577905.1?report=genbank&log$=prottop&blast_rank=68&RID=S1D4NTAA016","XP_016577905.1")
hypothetical protein [Colocasia esculenta]	Colocasia esculenta	734	734	0.99	0	89.72	390	https://www.ncbi.nlm.nih.gov/protein/MQL92536.1?report=genbank&log$=prottop&blast_rank=69&RID=S1D4NTAA016","MQL92536.1")
UDP-D-apiose/UDP-D-xylose synthase 2 [Datura stramonium]	Datura stramonium	734	734	0.99	0	89.41	386	https://www.ncbi.nlm.nih.gov/protein/MCD7470304.1?report=genbank&log$=prottop&blast_rank=70&RID=S1D4NTAA016","MCD7470304.1")
UDP-D-apiose/UDP-D-xylose synthase [Actinidia chinensis var. chinensis]	Actinidia chinensis var. chinensis	734	734	0.99	0	89.2	389	https://www.ncbi.nlm.nih.gov/protein/PSR95229.1?report=genbank&log$=prottop&blast_rank=71&RID=S1D4NTAA016","PSR95229.1")
UDP-D-apiose/UDP-D-xylose synthase 2-like [Juglans microcarpa x Juglans regia]	Juglans microcarpa x Juglans regia	734	734	1	0	89.23	388	https://www.ncbi.nlm.nih.gov/protein/XP_040994748.1?report=genbank&log$=prottop&blast_rank=72&RID=S1D4NTAA016","XP_040994748.1")
UDP-D-apiose/UDP-D-xylose synthase 2 [Nicotiana tomentosiformis]	Nicotiana tomentosiformis	734	734	0.99	0	89.66	386	https://www.ncbi.nlm.nih.gov/protein/XP_009622875.1?report=genbank&log$=prottop&blast_rank=73&RID=S1D4NTAA016","XP_009622875.1")
unnamed protein product [Cuscuta campestris]	Cuscuta campestris	734	734	0.99	0	89.18	386	https://www.ncbi.nlm.nih.gov/protein/VFQ67211.1?report=genbank&log$=prottop&blast_rank=74&RID=S1D4NTAA016","VFQ67211.1")
PREDICTED: UDP-D-apiose/UDP-D-xylose synthase 2-like [Nicotiana sylvestris]	Nicotiana sylvestris	734	734	0.99	0	89.66	386	https://www.ncbi.nlm.nih.gov/protein/XP_009766557.1?report=genbank&log$=prottop&blast_rank=75&RID=S1D4NTAA016","XP_009766557.1")
UDP-D-apiose/UDP-D-xylose synthase 2-like [Ipomoea triloba]	Ipomoea triloba	734	734	0.99	0	90.21	386	https://www.ncbi.nlm.nih.gov/protein/XP_031122907.1?report=genbank&log$=prottop&blast_rank=76&RID=S1D4NTAA016","XP_031122907.1")
UDP-D-apiose/UDP-D-xylose synthase 2 [Vigna umbellata]	Vigna umbellata	734	734	1	0	90	387	https://www.ncbi.nlm.nih.gov/protein/XP_047168017.1?report=genbank&log$=prottop&blast_rank=77&RID=S1D4NTAA016","XP_047168017.1")
PREDICTED: UDP-D-apiose/UDP-D-xylose synthase 2-like [Ipomoea nil]	Ipomoea nil	734	734	0.99	0	90.44	386	https://www.ncbi.nlm.nih.gov/protein/XP_019150472.1?report=genbank&log$=prottop&blast_rank=78&RID=S1D4NTAA016","XP_019150472.1")
UDP-D-apiose/UDP-D-xylose synthase 2 [Cajanus cajan]	Cajanus cajan	734	734	1	0	89.49	387	https://www.ncbi.nlm.nih.gov/protein/XP_020230997.1?report=genbank&log$=prottop&blast_rank=79&RID=S1D4NTAA016","XP_020230997.1")
UDP-D-apiose/UDP-D-xylose synthase 2 [Vigna unguiculata]	Vigna unguiculata	733	733	1	0	89.74	387	https://www.ncbi.nlm.nih.gov/protein/XP_027928970.1?report=genbank&log$=prottop&blast_rank=80&RID=S1D4NTAA016","XP_027928970.1")
UDP-D-apiose/UDP-D-xylose synthase 2-like [Telopea speciosissima]	Telopea speciosissima	733	733	0.99	0	89.97	390	https://www.ncbi.nlm.nih.gov/protein/XP_043724829.1?report=genbank&log$=prottop&blast_rank=81&RID=S1D4NTAA016","XP_043724829.1")
UDP-D-apiose/UDP-D-xylose synthase 2 [Herrania umbratica]	Herrania umbratica	733	733	1	0	90.26	386	https://www.ncbi.nlm.nih.gov/protein/XP_021278990.1?report=genbank&log$=prottop&blast_rank=82&RID=S1D4NTAA016","XP_021278990.1")
UDP-D-apiose/UDP-D-xylose synthase 2 [Striga hermonthica]	Striga hermonthica	733	733	0.99	0	89.46	388	https://www.ncbi.nlm.nih.gov/protein/CAA0815007.1?report=genbank&log$=prottop&blast_rank=83&RID=S1D4NTAA016","CAA0815007.1")
UDP-D-apiose/UDP-D-xylose synthase 2 [Helianthus annuus]	Helianthus annuus	733	733	1	0	88.97	387	https://www.ncbi.nlm.nih.gov/protein/XP_022026234.1?report=genbank&log$=prottop&blast_rank=84&RID=S1D4NTAA016","XP_022026234.1")
UDP-D-apiose/UDP-D-xylose synthase 2 [Mucuna pruriens]	Mucuna pruriens	733	733	1	0	90	477	https://www.ncbi.nlm.nih.gov/protein/RDX97920.1?report=genbank&log$=prottop&blast_rank=85&RID=S1D4NTAA016","RDX97920.1")
PREDICTED: UDP-D-apiose/UDP-D-xylose synthase 2 [Erythranthe guttata]	Erythranthe guttata	733	733	1	0	89.23	387	https://www.ncbi.nlm.nih.gov/protein/XP_012837986.1?report=genbank&log$=prottop&blast_rank=86&RID=S1D4NTAA016","XP_012837986.1")
PREDICTED: UDP-D-apiose/UDP-D-xylose synthase 2 [Nicotiana sylvestris]	Nicotiana sylvestris	733	733	0.99	0	89.15	386	https://www.ncbi.nlm.nih.gov/protein/XP_009787696.1?report=genbank&log$=prottop&blast_rank=87&RID=S1D4NTAA016","XP_009787696.1")
UDP-D-apiose/UDP-D-xylose synthase 2 [Mangifera indica]	Mangifera indica	732	732	1	0	89.29	390	https://www.ncbi.nlm.nih.gov/protein/XP_044504368.1?report=genbank&log$=prottop&blast_rank=88&RID=S1D4NTAA016","XP_044504368.1")
UDP-D-apiose/UDP-D-xylose synthase 2 [Actinidia rufa]	Actinidia rufa	732	732	0.99	0	89.46	389	https://www.ncbi.nlm.nih.gov/protein/GFZ20361.1?report=genbank&log$=prottop&blast_rank=89&RID=S1D4NTAA016","GFZ20361.1")
UDP-D-apiose/UDP-D-xylose synthase 2-like [Solanum verrucosum]	Solanum verrucosum	732	732	0.99	0	89.66	386	https://www.ncbi.nlm.nih.gov/protein/XP_049343758.1?report=genbank&log$=prottop&blast_rank=90&RID=S1D4NTAA016","XP_049343758.1")
hypothetical protein I3843_14G105400 [Carya illinoinensis]	Carya illinoinensis	732	732	1	0	88.97	388	https://www.ncbi.nlm.nih.gov/protein/KAG7947657.1?report=genbank&log$=prottop&blast_rank=91&RID=S1D4NTAA016","KAG7947657.1")
UDP-D-apiose/UDP-D-xylose synthase 2-like [Impatiens glandulifera]	Impatiens glandulifera	732	732	0.99	0	89.46	389	https://www.ncbi.nlm.nih.gov/protein/XP_047316664.1?report=genbank&log$=prottop&blast_rank=92&RID=S1D4NTAA016","XP_047316664.1")
UDP-D-apiose/UDP-D-xylose synthase 1-like [Salvia hispanica]	Salvia hispanica	732	732	1	0	88.97	387	https://www.ncbi.nlm.nih.gov/protein/XP_047967323.1?report=genbank&log$=prottop&blast_rank=93&RID=S1D4NTAA016","XP_047967323.1")
UDP-D-apiose/UDP-D-xylose synthase [Actinidia chinensis var. chinensis]	Actinidia chinensis var. chinensis	732	732	0.99	0	89.46	389	https://www.ncbi.nlm.nih.gov/protein/PSR86521.1?report=genbank&log$=prottop&blast_rank=94&RID=S1D4NTAA016","PSR86521.1")
hypothetical protein M9H77_16359 [Catharanthus roseus]	Catharanthus roseus	732	732	0.99	0	89.69	386	https://www.ncbi.nlm.nih.gov/protein/KAI5666506.1?report=genbank&log$=prottop&blast_rank=95&RID=S1D4NTAA016","KAI5666506.1")
hypothetical protein H5410_058053 [Solanum commersonii]	Solanum commersonii	732	732	0.99	0	89.41	386	https://www.ncbi.nlm.nih.gov/protein/KAG5577919.1?report=genbank&log$=prottop&blast_rank=96&RID=S1D4NTAA016","KAG5577919.1")
UDP-D-apiose/UDP-D-xylose synthase 2 [Ipomoea pes-caprae]	Ipomoea pes-caprae	732	732	0.99	0	90.21	386	https://www.ncbi.nlm.nih.gov/protein/AWW16485.1?report=genbank&log$=prottop&blast_rank=97&RID=S1D4NTAA016","AWW16485.1")
PREDICTED: UDP-D-apiose/UDP-D-xylose synthase 2 [Gossypium raimondii]	Gossypium raimondii	732	732	1	0	89.49	387	https://www.ncbi.nlm.nih.gov/protein/XP_012476324.1?report=genbank&log$=prottop&blast_rank=98&RID=S1D4NTAA016","XP_012476324.1")
UDP-D-apiose/UDP-D-xylose synthase 2 [Pistacia vera]	Pistacia vera	732	732	1	0	89.29	390	https://www.ncbi.nlm.nih.gov/protein/XP_031283462.1?report=genbank&log$=prottop&blast_rank=99&RID=S1D4NTAA016","XP_031283462.1")
UDP-D-apiose/UDP-D-xylose synthase 2 [Ziziphus jujuba var. spinosa]	Ziziphus jujuba var. spinosa	732	732	0.99	0	88.43	391	https://www.ncbi.nlm.nih.gov/protein/XP_015873538.1?report=genbank&log$=prottop&blast_rank=100&RID=S1D4NTAA016","XP_015873538.1")

## Sheet: KZV18065.1
S1D54ZJ3013-Alignment-Descriptions
Description	Scientific Name	Max Score	Total Score	Query Cover	E value	Per. ident	Acc. Len	Accession
UDP-D-apiose/UDP-D-xylose synthase 2-like [Dorcoceras hygrometricum]	Dorcoceras hygrometricum	809	809	1	0	100	390	https://www.ncbi.nlm.nih.gov/protein/KZV18065.1?report=genbank&log$=prottop&blast_rank=1&RID=S1D54ZJ3013","KZV18065.1")
UDP-D-apiose/UDP-D-xylose synthase 2-like [Dorcoceras hygrometricum]	Dorcoceras hygrometricum	799	799	1	0	98.21	390	https://www.ncbi.nlm.nih.gov/protein/KZV29416.1?report=genbank&log$=prottop&blast_rank=2&RID=S1D54ZJ3013","KZV29416.1")
UDP-D-apiose UDP-D-xylose synthase 2 [Olea europaea subsp. europaea]	Olea europaea subsp. europaea	749	749	1	0	90.51	390	https://www.ncbi.nlm.nih.gov/protein/CAA2998703.1?report=genbank&log$=prottop&blast_rank=3&RID=S1D54ZJ3013","CAA2998703.1")
UDP-D-apiose/UDP-D-xylose synthase 2 [Dorcoceras hygrometricum]	Dorcoceras hygrometricum	749	749	0.99	0	91	390	https://www.ncbi.nlm.nih.gov/protein/KZV25501.1?report=genbank&log$=prottop&blast_rank=4&RID=S1D54ZJ3013","KZV25501.1")
dTDP-glucose 4-6-dehydratase/UDP-glucuronic acid decarboxylase [Handroanthus impetiginosus]	Handroanthus impetiginosus	748	748	1	0	91.28	387	https://www.ncbi.nlm.nih.gov/protein/PIN09899.1?report=genbank&log$=prottop&blast_rank=5&RID=S1D54ZJ3013","PIN09899.1")
UDP-D-apiose/UDP-D-xylose synthase 2 [Olea europaea var. sylvestris]	Olea europaea var. sylvestris	747	747	1	0	90.51	390	https://www.ncbi.nlm.nih.gov/protein/XP_022854308.1?report=genbank&log$=prottop&blast_rank=6&RID=S1D54ZJ3013","XP_022854308.1")
hypothetical protein Pfo_018003 [Paulownia fortunei]	Paulownia fortunei	746	746	1	0	91.28	387	https://www.ncbi.nlm.nih.gov/protein/KAI3461340.1?report=genbank&log$=prottop&blast_rank=7&RID=S1D54ZJ3013","KAI3461340.1")
UDP-D-apiose/UDP-D-xylose synthase 2 [Striga hermonthica]	Striga hermonthica	745	745	1	0	90.77	387	https://www.ncbi.nlm.nih.gov/protein/CAA0813513.1?report=genbank&log$=prottop&blast_rank=8&RID=S1D54ZJ3013","CAA0813513.1")
UDP-D-apiose/UDP-D-xylose synthase 2 [Sesamum indicum]	Sesamum indicum	744	744	1	0	90.51	387	https://www.ncbi.nlm.nih.gov/protein/XP_011089988.1?report=genbank&log$=prottop&blast_rank=9&RID=S1D54ZJ3013","XP_011089988.1")
UDP-D-apiose/UDP-D-xylose synthase 2-like [Salvia splendens]	Salvia splendens	743	743	1	0	90.51	387	https://www.ncbi.nlm.nih.gov/protein/XP_041990328.1?report=genbank&log$=prottop&blast_rank=10&RID=S1D54ZJ3013","XP_041990328.1")
UDP-D-apiose/UDP-D-xylose synthase 2-like [Dorcoceras hygrometricum]	Dorcoceras hygrometricum	741	741	1	0	90	387	https://www.ncbi.nlm.nih.gov/protein/KZV42616.1?report=genbank&log$=prottop&blast_rank=11&RID=S1D54ZJ3013","KZV42616.1")
UDP-D-apiose/UDP-D-xylose synthase 2 [Salvia hispanica]	Salvia hispanica	741	741	1	0	90.26	387	https://www.ncbi.nlm.nih.gov/protein/XP_047937608.1?report=genbank&log$=prottop&blast_rank=12&RID=S1D54ZJ3013","XP_047937608.1")
dTDP-glucose 4-6-dehydratase/UDP-glucuronic acid decarboxylase [Handroanthus impetiginosus]	Handroanthus impetiginosus	740	740	1	0	90.51	387	https://www.ncbi.nlm.nih.gov/protein/PIN00981.1?report=genbank&log$=prottop&blast_rank=13&RID=S1D54ZJ3013","PIN00981.1")
UDP-D-apiose/UDP-D-xylose synthase 2-like [Salvia hispanica]	Salvia hispanica	740	740	1	0	90	386	https://www.ncbi.nlm.nih.gov/protein/XP_047971271.1?report=genbank&log$=prottop&blast_rank=14&RID=S1D54ZJ3013","XP_047971271.1")
UDP-D-apiose UDP-D-xylose synthase 2 [Olea europaea subsp. europaea]	Olea europaea subsp. europaea	739	739	1	0	90.26	390	https://www.ncbi.nlm.nih.gov/protein/CAA2966185.1?report=genbank&log$=prottop&blast_rank=15&RID=S1D54ZJ3013","CAA2966185.1")
UDP-D-apiose/UDP-D-xylose synthase 2 [Glycine max]	Glycine max	739	739	1	0	89.49	387	https://www.ncbi.nlm.nih.gov/protein/XP_003540213.1?report=genbank&log$=prottop&blast_rank=16&RID=S1D54ZJ3013","XP_003540213.1")
hypothetical protein DM860_006187 [Cuscuta australis]	Cuscuta australis	739	739	0.99	0	89.69	386	https://www.ncbi.nlm.nih.gov/protein/RAL46033.1?report=genbank&log$=prottop&blast_rank=17&RID=S1D54ZJ3013","RAL46033.1")
UDP-D-apiose/UDP-D-xylose synthase 2 [Sesamum indicum]	Sesamum indicum	739	739	1	0	90	387	https://www.ncbi.nlm.nih.gov/protein/XP_011088822.1?report=genbank&log$=prottop&blast_rank=18&RID=S1D54ZJ3013","XP_011088822.1")
hypothetical protein Vadar_001206 [Vaccinium darrowii]	Vaccinium darrowii	739	739	0.99	0	88.43	392	https://www.ncbi.nlm.nih.gov/protein/KAH7862185.1?report=genbank&log$=prottop&blast_rank=19&RID=S1D54ZJ3013","KAH7862185.1")
hypothetical protein SASPL_119471 [Salvia splendens]	Salvia splendens	739	739	1	0	89.49	441	https://www.ncbi.nlm.nih.gov/protein/KAG6417317.1?report=genbank&log$=prottop&blast_rank=20&RID=S1D54ZJ3013","KAG6417317.1")
Bifunctional polymyxin resistance protein ArnA [Glycine soja]	Glycine soja	738	738	1	0	89.23	387	https://www.ncbi.nlm.nih.gov/protein/KHN27689.1?report=genbank&log$=prottop&blast_rank=21&RID=S1D54ZJ3013","KHN27689.1")
UDP-d-apiose/UDP-d-xylose synthase 2 [Phtheirospermum japonicum]	Phtheirospermum japonicum	738	738	1	0	89.49	387	https://www.ncbi.nlm.nih.gov/protein/GFP95380.1?report=genbank&log$=prottop&blast_rank=22&RID=S1D54ZJ3013","GFP95380.1")
UDP-D-apiose/UDP-D-xylose synthase 2-like [Salvia splendens]	Salvia splendens	738	738	1	0	89.23	386	https://www.ncbi.nlm.nih.gov/protein/XP_041993900.1?report=genbank&log$=prottop&blast_rank=23&RID=S1D54ZJ3013","XP_041993900.1")
unnamed protein product [Cuscuta campestris]	Cuscuta campestris	738	738	0.99	0	89.43	386	https://www.ncbi.nlm.nih.gov/protein/VFQ82775.1?report=genbank&log$=prottop&blast_rank=24&RID=S1D54ZJ3013","VFQ82775.1")
PREDICTED: UDP-D-apiose/UDP-D-xylose synthase 2 [Ipomoea nil]	Ipomoea nil	738	738	0.99	0	90.21	386	https://www.ncbi.nlm.nih.gov/protein/XP_019199350.1?report=genbank&log$=prottop&blast_rank=25&RID=S1D54ZJ3013","XP_019199350.1")
UDP-D-apiose/UDP-D-xylose synthase 2-like [Salvia splendens]	Salvia splendens	738	738	1	0	89.49	386	https://www.ncbi.nlm.nih.gov/protein/XP_042068151.1?report=genbank&log$=prottop&blast_rank=26&RID=S1D54ZJ3013","XP_042068151.1")
hypothetical protein F0562_001933 [Nyssa sinensis]	Nyssa sinensis	738	738	0.99	0	90.23	435	https://www.ncbi.nlm.nih.gov/protein/KAA8550249.1?report=genbank&log$=prottop&blast_rank=27&RID=S1D54ZJ3013","KAA8550249.1")
hypothetical protein SASPL_101288 [Salvia splendens]	Salvia splendens	737	737	1	0	88.97	430	https://www.ncbi.nlm.nih.gov/protein/KAG6436390.1?report=genbank&log$=prottop&blast_rank=28&RID=S1D54ZJ3013","KAG6436390.1")
unnamed protein product [Cuscuta campestris]	Cuscuta campestris	737	737	0.99	0	89.43	386	https://www.ncbi.nlm.nih.gov/protein/VFQ96534.1?report=genbank&log$=prottop&blast_rank=29&RID=S1D54ZJ3013","VFQ96534.1")
UDP-D-apiose/UDP-D-xylose synthase 2 [Beta vulgaris subsp. vulgaris]	Beta vulgaris subsp. vulgaris	736	736	0.99	0	88.95	389	https://www.ncbi.nlm.nih.gov/protein/XP_010689975.1?report=genbank&log$=prottop&blast_rank=30&RID=S1D54ZJ3013","XP_010689975.1")
UDP-d-apiose/UDP-d-xylose synthase 2 [Phtheirospermum japonicum]	Phtheirospermum japonicum	736	736	1	0	89.23	387	https://www.ncbi.nlm.nih.gov/protein/GFP98029.1?report=genbank&log$=prottop&blast_rank=31&RID=S1D54ZJ3013","GFP98029.1")
PREDICTED: UDP-D-apiose/UDP-D-xylose synthase 2-like [Nicotiana attenuata]	Nicotiana attenuata	736	736	0.99	0	89.66	386	https://www.ncbi.nlm.nih.gov/protein/XP_019267061.1?report=genbank&log$=prottop&blast_rank=32&RID=S1D54ZJ3013","XP_019267061.1")
UDP-D-apiose/UDP-D-xylose synthase 2 [Senna tora]	Senna tora	735	735	0.99	0	89.97	388	https://www.ncbi.nlm.nih.gov/protein/KAF7823292.1?report=genbank&log$=prottop&blast_rank=33&RID=S1D54ZJ3013","KAF7823292.1")
UDP-D-apiose/UDP-D-xylose synthase 2 [Spatholobus suberectus]	Spatholobus suberectus	735	735	1	0	89.49	387	https://www.ncbi.nlm.nih.gov/protein/TKY48602.1?report=genbank&log$=prottop&blast_rank=34&RID=S1D54ZJ3013","TKY48602.1")
UDP-D-apiose/UDP-D-xylose synthase 1-like [Salvia splendens]	Salvia splendens	735	735	1	0	89.23	387	https://www.ncbi.nlm.nih.gov/protein/XP_041991229.1?report=genbank&log$=prottop&blast_rank=35&RID=S1D54ZJ3013","XP_041991229.1")
UDP-D-apiose/UDP-D-xylose synthase 2 [Abrus precatorius]	Abrus precatorius	735	735	1	0	89.74	387	https://www.ncbi.nlm.nih.gov/protein/XP_027339755.1?report=genbank&log$=prottop&blast_rank=36&RID=S1D54ZJ3013","XP_027339755.1")
UDP-D-apiose/UDP-D-xylose synthase 2-like [Ipomoea triloba]	Ipomoea triloba	735	735	0.99	0	89.43	387	https://www.ncbi.nlm.nih.gov/protein/XP_031101482.1?report=genbank&log$=prottop&blast_rank=37&RID=S1D54ZJ3013","XP_031101482.1")
PREDICTED: UDP-D-apiose/UDP-D-xylose synthase 2-like [Nicotiana tabacum]	Nicotiana tabacum	735	735	0.99	0	89.41	386	https://www.ncbi.nlm.nih.gov/protein/XP_016450694.1?report=genbank&log$=prottop&blast_rank=38&RID=S1D54ZJ3013","XP_016450694.1")
PREDICTED: UDP-D-apiose/UDP-D-xylose synthase 2 [Nicotiana attenuata]	Nicotiana attenuata	735	735	0.99	0	89.15	386	https://www.ncbi.nlm.nih.gov/protein/XP_019264998.1?report=genbank&log$=prottop&blast_rank=39&RID=S1D54ZJ3013","XP_019264998.1")
hypothetical protein BUALT_Bualt13G0065100 [Buddleja alternifolia]	Buddleja alternifolia	734	734	1	0	89.74	388	https://www.ncbi.nlm.nih.gov/protein/KAG8371221.1?report=genbank&log$=prottop&blast_rank=40&RID=S1D54ZJ3013","KAG8371221.1")
UDP-D-apiose/UDP-D-xylose synthase 2 [Salvia splendens]	Salvia splendens	734	734	1	0	88.97	386	https://www.ncbi.nlm.nih.gov/protein/XP_042050862.1?report=genbank&log$=prottop&blast_rank=41&RID=S1D54ZJ3013","XP_042050862.1")
UDP-D-apiose/UDP-D-xylose synthase 2-like [Nicotiana tomentosiformis]	Nicotiana tomentosiformis	734	734	0.99	0	89.41	386	https://www.ncbi.nlm.nih.gov/protein/XP_009593881.1?report=genbank&log$=prottop&blast_rank=42&RID=S1D54ZJ3013","XP_009593881.1")
UDP-D-apiose/UDP-D-xylose synthase 2 [Senna tora]	Senna tora	734	734	0.99	0	89.72	388	https://www.ncbi.nlm.nih.gov/protein/KAF7823294.1?report=genbank&log$=prottop&blast_rank=43&RID=S1D54ZJ3013","KAF7823294.1")
UDP-D-apiose/UDP-D-xylose synthase 2 [Ipomoea triloba]	Ipomoea triloba	734	734	0.99	0	89.95	386	https://www.ncbi.nlm.nih.gov/protein/XP_031114215.1?report=genbank&log$=prottop&blast_rank=44&RID=S1D54ZJ3013","XP_031114215.1")
hypothetical protein PHAVU_005G128500g [Phaseolus vulgaris]	Phaseolus vulgaris	734	734	1	0	89.23	387	https://www.ncbi.nlm.nih.gov/protein/XP_007150121.1?report=genbank&log$=prottop&blast_rank=45&RID=S1D54ZJ3013","XP_007150121.1")
UDP-D-apiose/UDP-D-xylose synthase 2-like [Salvia splendens]	Salvia splendens	734	734	1	0	89.23	386	https://www.ncbi.nlm.nih.gov/protein/XP_042012889.1?report=genbank&log$=prottop&blast_rank=46&RID=S1D54ZJ3013","XP_042012889.1")
PREDICTED: UDP-D-apiose/UDP-D-xylose synthase 2-like [Nicotiana tabacum]	Nicotiana tabacum	734	734	0.99	0	89.15	386	https://www.ncbi.nlm.nih.gov/protein/XP_016441248.1?report=genbank&log$=prottop&blast_rank=47&RID=S1D54ZJ3013","XP_016441248.1")
PREDICTED: UDP-D-apiose/UDP-D-xylose synthase 2-like [Ipomoea nil]	Ipomoea nil	734	734	0.99	0	89.18	387	https://www.ncbi.nlm.nih.gov/protein/XP_019161999.1?report=genbank&log$=prottop&blast_rank=48&RID=S1D54ZJ3013","XP_019161999.1")
UDP-D-apiose/UDP-D-xylose synthase [Actinidia chinensis var. chinensis]	Actinidia chinensis var. chinensis	734	734	0.99	0	89.2	389	https://www.ncbi.nlm.nih.gov/protein/PSR95229.1?report=genbank&log$=prottop&blast_rank=49&RID=S1D54ZJ3013","PSR95229.1")
UDP-D-apiose/UDP-D-xylose synthase 2 [Capsicum baccatum]	Capsicum baccatum	734	734	0.99	0	89.15	386	https://www.ncbi.nlm.nih.gov/protein/PHT30083.1?report=genbank&log$=prottop&blast_rank=50&RID=S1D54ZJ3013","PHT30083.1")
UDP-D-apiose/UDP-D-xylose synthase 2 [Juglans microcarpa x Juglans regia]	Juglans microcarpa x Juglans regia	734	734	1	0	88.72	388	https://www.ncbi.nlm.nih.gov/protein/XP_040992965.1?report=genbank&log$=prottop&blast_rank=51&RID=S1D54ZJ3013","XP_040992965.1")
UDP-D-apiose/UDP-D-xylose synthase 2-like [Salvia splendens]	Salvia splendens	734	734	1	0	89.49	387	https://www.ncbi.nlm.nih.gov/protein/XP_042012275.1?report=genbank&log$=prottop&blast_rank=52&RID=S1D54ZJ3013","XP_042012275.1")
UDP-D-apiose/UDP-D-xylose synthase 2 [Cynara cardunculus var. scolymus]	Cynara cardunculus var. scolymus	734	734	0.99	0	89.43	389	https://www.ncbi.nlm.nih.gov/protein/XP_024985124.1?report=genbank&log$=prottop&blast_rank=53&RID=S1D54ZJ3013","XP_024985124.1")
UDP-D-apiose/UDP-D-xylose synthase 2 [Vigna radiata var. radiata]	Vigna radiata var. radiata	733	733	1	0	89.49	387	https://www.ncbi.nlm.nih.gov/protein/XP_014498252.1?report=genbank&log$=prottop&blast_rank=54&RID=S1D54ZJ3013","XP_014498252.1")
UDP-D-apiose/UDP-D-xylose synthase 2 [Camellia sinensis]	Camellia sinensis	733	733	0.99	0	88.95	389	https://www.ncbi.nlm.nih.gov/protein/XP_028090926.1?report=genbank&log$=prottop&blast_rank=55&RID=S1D54ZJ3013","XP_028090926.1")
UDP-D-apiose/UDP-D-xylose synthase 2-like [Ipomoea triloba]	Ipomoea triloba	733	733	0.99	0	89.18	386	https://www.ncbi.nlm.nih.gov/protein/XP_031122907.1?report=genbank&log$=prottop&blast_rank=56&RID=S1D54ZJ3013","XP_031122907.1")
UDP-D-apiose/UDP-D-xylose synthase 2 [Datura stramonium]	Datura stramonium	732	732	0.99	0	88.63	386	https://www.ncbi.nlm.nih.gov/protein/MCD7470304.1?report=genbank&log$=prottop&blast_rank=57&RID=S1D54ZJ3013","MCD7470304.1")
UDP-D-apiose/UDP-D-xylose synthase 2 [Camellia lanceoleosa]	Camellia lanceoleosa	732	732	0.99	0	88.69	389	https://www.ncbi.nlm.nih.gov/protein/KAI7983109.1?report=genbank&log$=prottop&blast_rank=58&RID=S1D54ZJ3013","KAI7983109.1")
PREDICTED: UDP-D-apiose/UDP-D-xylose synthase 2-like [Ipomoea nil]	Ipomoea nil	732	732	0.99	0	89.18	386	https://www.ncbi.nlm.nih.gov/protein/XP_019150472.1?report=genbank&log$=prottop&blast_rank=59&RID=S1D54ZJ3013","XP_019150472.1")
UDP-D-apiose/UDP-D-xylose synthase 2 [Juglans regia]	Juglans regia	732	732	1	0	88.46	388	https://www.ncbi.nlm.nih.gov/protein/XP_018833171.1?report=genbank&log$=prottop&blast_rank=60&RID=S1D54ZJ3013","XP_018833171.1")
UDP-D-apiose/UDP-D-xylose synthase 2-like [Carya illinoinensis]	Carya illinoinensis	732	732	1	0	88.21	388	https://www.ncbi.nlm.nih.gov/protein/XP_042959621.1?report=genbank&log$=prottop&blast_rank=61&RID=S1D54ZJ3013","XP_042959621.1")
hypothetical protein SASPL_104687 [Salvia splendens]	Salvia splendens	732	732	0.99	0	89.15	490	https://www.ncbi.nlm.nih.gov/protein/KAG6433080.1?report=genbank&log$=prottop&blast_rank=62&RID=S1D54ZJ3013","KAG6433080.1")
UDP-D-apiose/UDP-D-xylose synthase 2 [Capsicum annuum]	Capsicum annuum	731	731	0.99	0	88.89	386	https://www.ncbi.nlm.nih.gov/protein/XP_016577905.1?report=genbank&log$=prottop&blast_rank=63&RID=S1D54ZJ3013","XP_016577905.1")
UDP-D-apiose/UDP-D-xylose synthase 2 [Nicotiana tomentosiformis]	Nicotiana tomentosiformis	731	731	0.99	0	88.89	386	https://www.ncbi.nlm.nih.gov/protein/XP_009622875.1?report=genbank&log$=prottop&blast_rank=64&RID=S1D54ZJ3013","XP_009622875.1")
UDP-D-apiose/UDP-D-xylose synthase 2 [Theobroma cacao]	Theobroma cacao	731	731	1	0	89.74	451	https://www.ncbi.nlm.nih.gov/protein/EOY33604.1?report=genbank&log$=prottop&blast_rank=65&RID=S1D54ZJ3013","EOY33604.1")
PREDICTED: UDP-D-apiose/UDP-D-xylose synthase 2 [Vigna angularis]	Vigna angularis	731	731	1	0	89.23	387	https://www.ncbi.nlm.nih.gov/protein/XP_017425852.1?report=genbank&log$=prottop&blast_rank=66&RID=S1D54ZJ3013","XP_017425852.1")
PREDICTED: UDP-D-apiose/UDP-D-xylose synthase 2-like [Nicotiana sylvestris]	Nicotiana sylvestris	731	731	0.99	0	88.89	386	https://www.ncbi.nlm.nih.gov/protein/XP_009766557.1?report=genbank&log$=prottop&blast_rank=67&RID=S1D54ZJ3013","XP_009766557.1")
UDP-D-apiose/UDP-D-xylose synthase 2 [Andrographis paniculata]	Andrographis paniculata	731	731	1	0	88.21	387	https://www.ncbi.nlm.nih.gov/protein/XP_051120852.1?report=genbank&log$=prottop&blast_rank=68&RID=S1D54ZJ3013","XP_051120852.1")
UDP-D-apiose/UDP-D-xylose synthase 2-like [Juglans regia]	Juglans regia	731	731	1	0	87.95	388	https://www.ncbi.nlm.nih.gov/protein/XP_035546070.1?report=genbank&log$=prottop&blast_rank=69&RID=S1D54ZJ3013","XP_035546070.1")
UDP-D-apiose/UDP-D-xylose synthase 2-like [Juglans microcarpa x Juglans regia]	Juglans microcarpa x Juglans regia	731	731	1	0	88.21	388	https://www.ncbi.nlm.nih.gov/protein/XP_040994748.1?report=genbank&log$=prottop&blast_rank=70&RID=S1D54ZJ3013","XP_040994748.1")
UDP-D-apiose/UDP-D-xylose synthase 1-like [Salvia hispanica]	Salvia hispanica	731	731	1	0	88.72	387	https://www.ncbi.nlm.nih.gov/protein/XP_047967323.1?report=genbank&log$=prottop&blast_rank=71&RID=S1D54ZJ3013","XP_047967323.1")
hypothetical protein SLEP1_g27251 [Shorea leprosula]	Shorea leprosula	730	730	1	0	89.26	388	https://www.ncbi.nlm.nih.gov/protein/GKV16635.1?report=genbank&log$=prottop&blast_rank=72&RID=S1D54ZJ3013","GKV16635.1")
PREDICTED: UDP-D-apiose/UDP-D-xylose synthase 2 [Theobroma cacao]	Theobroma cacao	730	730	1	0	89.74	386	https://www.ncbi.nlm.nih.gov/protein/XP_017983686.1?report=genbank&log$=prottop&blast_rank=73&RID=S1D54ZJ3013","XP_017983686.1")
UDP-D-apiose/UDP-D-xylose synthase 2 [Helianthus annuus]	Helianthus annuus	730	730	1	0	88.46	387	https://www.ncbi.nlm.nih.gov/protein/XP_022026234.1?report=genbank&log$=prottop&blast_rank=74&RID=S1D54ZJ3013","XP_022026234.1")
hypothetical protein [Colocasia esculenta]	Colocasia esculenta	730	730	0.99	0	88.69	390	https://www.ncbi.nlm.nih.gov/protein/MQL92536.1?report=genbank&log$=prottop&blast_rank=75&RID=S1D54ZJ3013","MQL92536.1")
PREDICTED: UDP-D-apiose/UDP-D-xylose synthase 2 [Nicotiana sylvestris]	Nicotiana sylvestris	730	730	0.99	0	88.37	386	https://www.ncbi.nlm.nih.gov/protein/XP_009787696.1?report=genbank&log$=prottop&blast_rank=76&RID=S1D54ZJ3013","XP_009787696.1")
UDP-D-apiose/UDP-D-xylose synthase 2 [Mangifera indica]	Mangifera indica	730	730	1	0	88.78	390	https://www.ncbi.nlm.nih.gov/protein/XP_044504368.1?report=genbank&log$=prottop&blast_rank=77&RID=S1D54ZJ3013","XP_044504368.1")
UDP-D-apiose/UDP-D-xylose synthase 2-like [Solanum verrucosum]	Solanum verrucosum	730	730	0.99	0	88.89	386	https://www.ncbi.nlm.nih.gov/protein/XP_049343758.1?report=genbank&log$=prottop&blast_rank=78&RID=S1D54ZJ3013","XP_049343758.1")
UDP-D-apiose/UDP-D-xylose synthase 2-like [Camellia sinensis]	Camellia sinensis	730	730	0.99	0	89.2	389	https://www.ncbi.nlm.nih.gov/protein/XP_028097413.1?report=genbank&log$=prottop&blast_rank=79&RID=S1D54ZJ3013","XP_028097413.1")
UDP-D-apiose/UDP-D-xylose synthase 2 [Vigna unguiculata]	Vigna unguiculata	729	729	1	0	88.72	387	https://www.ncbi.nlm.nih.gov/protein/XP_027928970.1?report=genbank&log$=prottop&blast_rank=80&RID=S1D54ZJ3013","XP_027928970.1")
UDP-D-apiose/UDP-D-xylose synthase 2 [Vigna umbellata]	Vigna umbellata	729	729	1	0	88.97	387	https://www.ncbi.nlm.nih.gov/protein/XP_047168017.1?report=genbank&log$=prottop&blast_rank=81&RID=S1D54ZJ3013","XP_047168017.1")
UDP-D-apiose/UDP-D-xylose synthase 2-like [Impatiens glandulifera]	Impatiens glandulifera	729	729	0.99	0	88.69	389	https://www.ncbi.nlm.nih.gov/protein/XP_047316664.1?report=genbank&log$=prottop&blast_rank=82&RID=S1D54ZJ3013","XP_047316664.1")
hypothetical protein FH972_010102 [Carpinus fangiana]	Carpinus fangiana	729	729	1	0	88.46	388	https://www.ncbi.nlm.nih.gov/protein/KAE8037516.1?report=genbank&log$=prottop&blast_rank=83&RID=S1D54ZJ3013","KAE8037516.1")
hypothetical protein H5410_058053 [Solanum commersonii]	Solanum commersonii	729	729	0.99	0	88.63	386	https://www.ncbi.nlm.nih.gov/protein/KAG5577919.1?report=genbank&log$=prottop&blast_rank=84&RID=S1D54ZJ3013","KAG5577919.1")
UDP-D-apiose/UDP-D-xylose synthase 2 [Cajanus cajan]	Cajanus cajan	729	729	1	0	88.46	387	https://www.ncbi.nlm.nih.gov/protein/XP_020230997.1?report=genbank&log$=prottop&blast_rank=85&RID=S1D54ZJ3013","XP_020230997.1")
hypothetical protein I3842_13G140700 [Carya illinoinensis]	Carya illinoinensis	729	729	1	0	87.95	388	https://www.ncbi.nlm.nih.gov/protein/KAG6682420.1?report=genbank&log$=prottop&blast_rank=86&RID=S1D54ZJ3013","KAG6682420.1")
UDP-D-apiose/UDP-D-xylose synthase 2 [Actinidia rufa]	Actinidia rufa	729	729	0.99	0	88.95	389	https://www.ncbi.nlm.nih.gov/protein/GFZ20361.1?report=genbank&log$=prottop&blast_rank=87&RID=S1D54ZJ3013","GFZ20361.1")
UDP-D-apiose/UDP-D-xylose synthase 2 [Herrania umbratica]	Herrania umbratica	729	729	1	0	89.74	386	https://www.ncbi.nlm.nih.gov/protein/XP_021278990.1?report=genbank&log$=prottop&blast_rank=88&RID=S1D54ZJ3013","XP_021278990.1")
UDP-D-apiose/UDP-D-xylose synthase 2 [Datura stramonium]	Datura stramonium	729	729	0.99	0	88.89	386	https://www.ncbi.nlm.nih.gov/protein/MCD7464183.1?report=genbank&log$=prottop&blast_rank=89&RID=S1D54ZJ3013","MCD7464183.1")
unnamed protein product [Cuscuta campestris]	Cuscuta campestris	729	729	0.99	0	88.4	386	https://www.ncbi.nlm.nih.gov/protein/VFQ71553.1?report=genbank&log$=prottop&blast_rank=90&RID=S1D54ZJ3013","VFQ71553.1")
hypothetical protein I3843_14G105400 [Carya illinoinensis]	Carya illinoinensis	729	729	1	0	87.95	388	https://www.ncbi.nlm.nih.gov/protein/KAG7947657.1?report=genbank&log$=prottop&blast_rank=91&RID=S1D54ZJ3013","KAG7947657.1")
UDP-D-apiose/UDP-D-xylose synthase 2 [Solanum lycopersicum]	Solanum lycopersicum	728	728	0.99	0	88.37	386	https://www.ncbi.nlm.nih.gov/protein/NP_001296729.1?report=genbank&log$=prottop&blast_rank=92&RID=S1D54ZJ3013","NP_001296729.1")
UDP-D-apiose/UDP-D-xylose synthase 2 [Helianthus annuus]	Helianthus annuus	728	728	0.99	0	88.89	385	https://www.ncbi.nlm.nih.gov/protein/XP_022000491.1?report=genbank&log$=prottop&blast_rank=93&RID=S1D54ZJ3013","XP_022000491.1")
UDP-D-apiose/UDP-D-xylose synthase 2 [Solanum lycopersicum]	Solanum lycopersicum	728	728	0.99	0	89.15	386	https://www.ncbi.nlm.nih.gov/protein/XP_004241299.1?report=genbank&log$=prottop&blast_rank=94&RID=S1D54ZJ3013","XP_004241299.1")
hypothetical protein L1987_81842 [Smallanthus sonchifolius]	Smallanthus sonchifolius	728	728	0.99	0	88.89	385	https://www.ncbi.nlm.nih.gov/protein/KAI3688134.1?report=genbank&log$=prottop&blast_rank=95&RID=S1D54ZJ3013","KAI3688134.1")
hypothetical protein KY289_009728 [Solanum tuberosum]	Solanum tuberosum	728	728	0.99	0	88.37	386	https://www.ncbi.nlm.nih.gov/protein/KAH0713769.1?report=genbank&log$=prottop&blast_rank=96&RID=S1D54ZJ3013","KAH0713769.1")
UDP-D-apiose/UDP-D-xylose synthase 2 [Striga hermonthica]	Striga hermonthica	728	728	0.99	0	88.95	388	https://www.ncbi.nlm.nih.gov/protein/CAA0815007.1?report=genbank&log$=prottop&blast_rank=97&RID=S1D54ZJ3013","CAA0815007.1")
UDP-D-apiose/UDP-D-xylose synthase 2 [Solanum verrucosum]	Solanum verrucosum	728	728	0.99	0	88.37	386	https://www.ncbi.nlm.nih.gov/protein/XP_049353631.1?report=genbank&log$=prottop&blast_rank=98&RID=S1D54ZJ3013","XP_049353631.1")
hypothetical protein KY289_028365 [Solanum tuberosum]	Solanum tuberosum	728	728	0.99	0	88.89	386	https://www.ncbi.nlm.nih.gov/protein/KAH0659617.1?report=genbank&log$=prottop&blast_rank=99&RID=S1D54ZJ3013","KAH0659617.1")
UDP-D-apiose/UDP-D-xylose synthase 2 [Mucuna pruriens]	Mucuna pruriens	728	728	1	0	88.97	477	https://www.ncbi.nlm.nih.gov/protein/RDX97920.1?report=genbank&log$=prottop&blast_rank=100&RID=S1D54ZJ3013","RDX97920.1")

## Sheet: KZV34753.1
S1DSS3K4013-Alignment-Descriptions
Description	Scientific Name	Max Score	Total Score	Query Cover	E value	Per. ident	Acc. Len	Accession
hypothetical protein F511_00655 [Dorcoceras hygrometricum]	Dorcoceras hygrometricum	979	979	1	0	100	477	https://www.ncbi.nlm.nih.gov/protein/KZV34753.1?report=genbank&log$=prottop&blast_rank=1&RID=S1DSS3K4013","KZV34753.1")
elongation factor, chloroplastic [Olea europaea subsp. europaea]	Olea europaea subsp. europaea	831	831	1	0	86.34	480	https://www.ncbi.nlm.nih.gov/protein/CAA2934257.1?report=genbank&log$=prottop&blast_rank=2&RID=S1DSS3K4013","CAA2934257.1")
PREDICTED: elongation factor TuB, chloroplastic [Erythranthe guttata]	Erythranthe guttata	819	819	1	0	86.67	476	https://www.ncbi.nlm.nih.gov/protein/XP_012855594.1?report=genbank&log$=prottop&blast_rank=3&RID=S1DSS3K4013","XP_012855594.1")
Mitochondrial translation elongation factor Tu [Handroanthus impetiginosus]	Handroanthus impetiginosus	818	818	0.97	0	89.44	476	https://www.ncbi.nlm.nih.gov/protein/PIN26367.1?report=genbank&log$=prottop&blast_rank=4&RID=S1DSS3K4013","PIN26367.1")
elongation factor TuB, chloroplastic [Sesamum indicum]	Sesamum indicum	811	811	0.96	0	91.13	475	https://www.ncbi.nlm.nih.gov/protein/XP_011101284.1?report=genbank&log$=prottop&blast_rank=5&RID=S1DSS3K4013","XP_011101284.1")
hypothetical protein Pfo_020803 [Paulownia fortunei]	Paulownia fortunei	808	808	1	0	89.52	475	https://www.ncbi.nlm.nih.gov/protein/KAI3464140.1?report=genbank&log$=prottop&blast_rank=6&RID=S1DSS3K4013","KAI3464140.1")
elongation factor Tu, chloroplastic [Tripterygium wilfordii]	Tripterygium wilfordii	807	807	0.93	0	85.65	488	https://www.ncbi.nlm.nih.gov/protein/XP_038684873.1?report=genbank&log$=prottop&blast_rank=7&RID=S1DSS3K4013","XP_038684873.1")
elongation factor TuA, chloroplastic-like [Sesamum indicum]	Sesamum indicum	806	806	0.96	0	90.3	477	https://www.ncbi.nlm.nih.gov/protein/XP_020547944.1?report=genbank&log$=prottop&blast_rank=8&RID=S1DSS3K4013","XP_020547944.1")
hypothetical protein M569_13065 [Genlisea aurea]	Genlisea aurea	806	806	0.98	0	87.16	477	https://www.ncbi.nlm.nih.gov/protein/EPS61728.1?report=genbank&log$=prottop&blast_rank=9&RID=S1DSS3K4013","EPS61728.1")
Elongation factor Tu- chloroplastic [Striga hermonthica]	Striga hermonthica	800	800	1	0	85.68	477	https://www.ncbi.nlm.nih.gov/protein/CAA0836144.1?report=genbank&log$=prottop&blast_rank=10&RID=S1DSS3K4013","CAA0836144.1")
elongation factor Tu, chloroplastic [Andrographis paniculata]	Andrographis paniculata	800	800	1	0	85.59	476	https://www.ncbi.nlm.nih.gov/protein/XP_051136476.1?report=genbank&log$=prottop&blast_rank=11&RID=S1DSS3K4013","XP_051136476.1")
elongation factor Tu, chloroplastic-like [Punica granatum]	Punica granatum	800	800	0.93	0	88.34	485	https://www.ncbi.nlm.nih.gov/protein/XP_031407414.1?report=genbank&log$=prottop&blast_rank=12&RID=S1DSS3K4013","XP_031407414.1")
elongation factor Tu [Striga asiatica]	Striga asiatica	797	797	1	0	85.48	477	https://www.ncbi.nlm.nih.gov/protein/GER53190.1?report=genbank&log$=prottop&blast_rank=13&RID=S1DSS3K4013","GER53190.1")
hypothetical protein L6164_014779 [Bauhinia variegata]	Bauhinia variegata	796	796	0.96	0	86.27	490	https://www.ncbi.nlm.nih.gov/protein/KAI4336229.1?report=genbank&log$=prottop&blast_rank=14&RID=S1DSS3K4013","KAI4336229.1")
elongation factor TuB, chloroplastic-like [Salvia splendens]	Salvia splendens	796	796	0.96	0	86.85	471	https://www.ncbi.nlm.nih.gov/protein/XP_042042847.1?report=genbank&log$=prottop&blast_rank=15&RID=S1DSS3K4013","XP_042042847.1")
hypothetical protein Pfo_011084 [Paulownia fortunei]	Paulownia fortunei	796	796	0.96	0	90.91	476	https://www.ncbi.nlm.nih.gov/protein/KAI3454421.1?report=genbank&log$=prottop&blast_rank=16&RID=S1DSS3K4013","KAI3454421.1")
Elongation factor Tu- chloroplastic [Striga hermonthica]	Striga hermonthica	795	795	1	0	85.48	475	https://www.ncbi.nlm.nih.gov/protein/CAA0828957.1?report=genbank&log$=prottop&blast_rank=17&RID=S1DSS3K4013","CAA0828957.1")
PREDICTED: elongation factor TuA, chloroplastic [Nicotiana attenuata]	Nicotiana attenuata	795	795	1	0	85.45	478	https://www.ncbi.nlm.nih.gov/protein/XP_019227020.1?report=genbank&log$=prottop&blast_rank=18&RID=S1DSS3K4013","XP_019227020.1")
PREDICTED: elongation factor TuA, chloroplastic [Nicotiana sylvestris]	Nicotiana sylvestris	795	795	1	0	85.45	478	https://www.ncbi.nlm.nih.gov/protein/XP_009779094.1?report=genbank&log$=prottop&blast_rank=19&RID=S1DSS3K4013","XP_009779094.1")
elongation factor Tu, chloroplastic-like [Impatiens glandulifera]	Impatiens glandulifera	794	794	0.99	0	84.42	495	https://www.ncbi.nlm.nih.gov/protein/XP_047327125.1?report=genbank&log$=prottop&blast_rank=20&RID=S1DSS3K4013","XP_047327125.1")
elongation factor Tu, chloroplastic [Nicotiana tomentosiformis]	Nicotiana tomentosiformis	794	794	1	0	85.24	478	https://www.ncbi.nlm.nih.gov/protein/XP_009628327.1?report=genbank&log$=prottop&blast_rank=21&RID=S1DSS3K4013","XP_009628327.1")
elongation factor Tu [Striga asiatica]	Striga asiatica	793	793	1	0	85.21	475	https://www.ncbi.nlm.nih.gov/protein/GER27066.1?report=genbank&log$=prottop&blast_rank=22&RID=S1DSS3K4013","GER27066.1")
elongation factor Tu, chloroplastic-like [Salvia hispanica]	Salvia hispanica	792	792	0.98	0	84.32	469	https://www.ncbi.nlm.nih.gov/protein/XP_047938502.1?report=genbank&log$=prottop&blast_rank=23&RID=S1DSS3K4013","XP_047938502.1")
elongation factor TuB, chloroplastic-like [Salvia splendens]	Salvia splendens	790	790	0.97	0	85.75	471	https://www.ncbi.nlm.nih.gov/protein/XP_042037503.1?report=genbank&log$=prottop&blast_rank=24&RID=S1DSS3K4013","XP_042037503.1")
elongation factor TuB, chloroplastic [Olea europaea var. sylvestris]	Olea europaea var. sylvestris	790	790	0.93	0	89.01	478	https://www.ncbi.nlm.nih.gov/protein/XP_022889892.1?report=genbank&log$=prottop&blast_rank=25&RID=S1DSS3K4013","XP_022889892.1")
hypothetical protein BUALT_Bualt07G0019900 [Buddleja alternifolia]	Buddleja alternifolia	789	789	0.96	0	90.26	474	https://www.ncbi.nlm.nih.gov/protein/KAG8378773.1?report=genbank&log$=prottop&blast_rank=26&RID=S1DSS3K4013","KAG8378773.1")
PREDICTED: elongation factor Tu, chloroplastic-like [Tarenaya hassleriana]	Tarenaya hassleriana	788	788	0.99	0	83.47	485	https://www.ncbi.nlm.nih.gov/protein/XP_010529344.1?report=genbank&log$=prottop&blast_rank=27&RID=S1DSS3K4013","XP_010529344.1")
Elongation factor Tu like [Actinidia chinensis var. chinensis]	Actinidia chinensis var. chinensis	788	788	0.98	0	84.02	479	https://www.ncbi.nlm.nih.gov/protein/PSR96722.1?report=genbank&log$=prottop&blast_rank=28&RID=S1DSS3K4013","PSR96722.1")
elongation factor Tu, chloroplastic [Carya illinoinensis]	Carya illinoinensis	788	788	0.93	0	86.92	492	https://www.ncbi.nlm.nih.gov/protein/XP_042948142.1?report=genbank&log$=prottop&blast_rank=29&RID=S1DSS3K4013","XP_042948142.1")
hypothetical protein BUALT_Bualt07G0020100 [Buddleja alternifolia]	Buddleja alternifolia	787	787	0.96	0	90.28	475	https://www.ncbi.nlm.nih.gov/protein/KAG8378775.1?report=genbank&log$=prottop&blast_rank=30&RID=S1DSS3K4013","KAG8378775.1")
hypothetical protein H0E87_006674 [Populus deltoides]	Populus deltoides	787	787	0.94	0	87.78	483	https://www.ncbi.nlm.nih.gov/protein/KAH8513493.1?report=genbank&log$=prottop&blast_rank=31&RID=S1DSS3K4013","KAH8513493.1")
elongation factor Tu, chloroplastic [Nymphaea colorata]	Nymphaea colorata	787	787	0.9	0	89.58	481	https://www.ncbi.nlm.nih.gov/protein/XP_031480633.1?report=genbank&log$=prottop&blast_rank=32&RID=S1DSS3K4013","XP_031480633.1")
hypothetical protein POTOM_000893 [Populus tomentosa]	Populus tomentosa	786	786	0.94	0	88	483	https://www.ncbi.nlm.nih.gov/protein/KAG6791760.1?report=genbank&log$=prottop&blast_rank=33&RID=S1DSS3K4013","KAG6791760.1")
RAB GTPase-like protein E1B [Perilla frutescens var. frutescens]	Perilla frutescens var. frutescens	786	786	0.92	0	87.13	477	https://www.ncbi.nlm.nih.gov/protein/KAH6806687.1?report=genbank&log$=prottop&blast_rank=34&RID=S1DSS3K4013","KAH6806687.1")
RAB GTPase-like protein E1B [Perilla frutescens var. hirtella]	Perilla frutescens var. hirtella	786	786	0.92	0	87.13	474	https://www.ncbi.nlm.nih.gov/protein/KAH6761560.1?report=genbank&log$=prottop&blast_rank=35&RID=S1DSS3K4013","KAH6761560.1")
elongation factor Tu, chloroplastic-like [Populus alba]	Populus alba	785	785	0.94	0	87.78	483	https://www.ncbi.nlm.nih.gov/protein/XP_034894824.1?report=genbank&log$=prottop&blast_rank=36&RID=S1DSS3K4013","XP_034894824.1")
LOW QUALITY PROTEIN: elongation factor Tu, chloroplastic-like [Salvia hispanica]	Salvia hispanica	785	785	0.96	0	85.59	474	https://www.ncbi.nlm.nih.gov/protein/XP_047940173.1?report=genbank&log$=prottop&blast_rank=37&RID=S1DSS3K4013","XP_047940173.1")
hypothetical protein SADUNF_Sadunf01G0086900 [Salix dunnii]	Salix dunnii	784	784	0.94	0	87.33	483	https://www.ncbi.nlm.nih.gov/protein/KAF9689386.1?report=genbank&log$=prottop&blast_rank=38&RID=S1DSS3K4013","KAF9689386.1")
RAB GTPase-like protein E1B [Perilla frutescens var. hirtella]	Perilla frutescens var. hirtella	784	784	0.92	0	86.91	475	https://www.ncbi.nlm.nih.gov/protein/KAH6829252.1?report=genbank&log$=prottop&blast_rank=39&RID=S1DSS3K4013","KAH6829252.1")
hypothetical protein POTOM_004439 [Populus tomentosa]	Populus tomentosa	784	784	0.94	0	88.22	483	https://www.ncbi.nlm.nih.gov/protein/KAG6788374.1?report=genbank&log$=prottop&blast_rank=40&RID=S1DSS3K4013","KAG6788374.1")
elongation factor Tu, chloroplastic [Populus alba]	Populus alba	784	784	0.94	0	87.56	483	https://www.ncbi.nlm.nih.gov/protein/XP_034888016.1?report=genbank&log$=prottop&blast_rank=41&RID=S1DSS3K4013","XP_034888016.1")
hypothetical protein PHAVU_009G173200g [Phaseolus vulgaris]	Phaseolus vulgaris	783	783	0.92	0	88.41	488	https://www.ncbi.nlm.nih.gov/protein/XP_007138007.1?report=genbank&log$=prottop&blast_rank=42&RID=S1DSS3K4013","XP_007138007.1")
Elongation factor Tu [Nymphaea thermarum]	Nymphaea thermarum	783	783	0.9	0	89.35	481	https://www.ncbi.nlm.nih.gov/protein/KAF3780708.1?report=genbank&log$=prottop&blast_rank=43&RID=S1DSS3K4013","KAF3780708.1")
elongation factor Tu, chloroplastic-like [Hibiscus syriacus]	Hibiscus syriacus	783	783	1	0	83.16	485	https://www.ncbi.nlm.nih.gov/protein/XP_039029030.1?report=genbank&log$=prottop&blast_rank=44&RID=S1DSS3K4013","XP_039029030.1")
hypothetical protein DKX38_000809 [Salix brachista]	Salix brachista	783	783	0.94	0	87.11	483	https://www.ncbi.nlm.nih.gov/protein/KAB5573615.1?report=genbank&log$=prottop&blast_rank=45&RID=S1DSS3K4013","KAB5573615.1")
elongation factor Tu, chloroplastic [Rhodamnia argentea]	Rhodamnia argentea	783	783	0.98	0	83.4	483	https://www.ncbi.nlm.nih.gov/protein/XP_030542198.1?report=genbank&log$=prottop&blast_rank=46&RID=S1DSS3K4013","XP_030542198.1")
hypothetical protein LOK49_LG04G02144 [Camellia lanceoleosa]	Camellia lanceoleosa	783	783	0.94	0	87.5	483	https://www.ncbi.nlm.nih.gov/protein/KAI8020103.1?report=genbank&log$=prottop&blast_rank=47&RID=S1DSS3K4013","KAI8020103.1")
elongation factor Tu, chloroplastic [Populus trichocarpa]	Populus trichocarpa	783	783	0.94	0	88	483	https://www.ncbi.nlm.nih.gov/protein/XP_002304468.2?report=genbank&log$=prottop&blast_rank=48&RID=S1DSS3K4013","XP_002304468.2")
PREDICTED: elongation factor TuA, chloroplastic-like [Erythranthe guttata]	Erythranthe guttata	782	782	1	0	87.24	474	https://www.ncbi.nlm.nih.gov/protein/XP_012829246.1?report=genbank&log$=prottop&blast_rank=49&RID=S1DSS3K4013","XP_012829246.1")
elongation factor Tu, chloroplastic [Vigna radiata var. radiata]	Vigna radiata var. radiata	782	782	0.94	0	87.89	485	https://www.ncbi.nlm.nih.gov/protein/XP_014502162.1?report=genbank&log$=prottop&blast_rank=50&RID=S1DSS3K4013","XP_014502162.1")
hypothetical protein POPTR_001G110200v4 [Populus trichocarpa]	Populus trichocarpa	781	781	0.94	0	87.78	483	https://www.ncbi.nlm.nih.gov/protein/KAI9401351.1?report=genbank&log$=prottop&blast_rank=51&RID=S1DSS3K4013","KAI9401351.1")
RAB GTPase-like protein E1B [Perilla frutescens var. frutescens]	Perilla frutescens var. frutescens	781	781	0.93	0	86.58	477	https://www.ncbi.nlm.nih.gov/protein/KAH6803270.1?report=genbank&log$=prottop&blast_rank=52&RID=S1DSS3K4013","KAH6803270.1")
hypothetical protein H6P81_012842 [Aristolochia fimbriata]	Aristolochia fimbriata	781	781	0.97	0	84.65	485	https://www.ncbi.nlm.nih.gov/protein/KAG9446714.1?report=genbank&log$=prottop&blast_rank=53&RID=S1DSS3K4013","KAG9446714.1")
elongation factor Tu, chloroplastic-like [Impatiens glandulifera]	Impatiens glandulifera	781	781	0.96	0	85.68	487	https://www.ncbi.nlm.nih.gov/protein/XP_047333564.1?report=genbank&log$=prottop&blast_rank=54&RID=S1DSS3K4013","XP_047333564.1")
RAB GTPase-like protein E1B [Perilla frutescens var. hirtella]	Perilla frutescens var. hirtella	781	781	1	0	86.43	473	https://www.ncbi.nlm.nih.gov/protein/KAH6832306.1?report=genbank&log$=prottop&blast_rank=55&RID=S1DSS3K4013","KAH6832306.1")
elongation factor Tu, chloroplastic [Populus trichocarpa]	Populus trichocarpa	781	781	0.94	0	87.56	483	https://www.ncbi.nlm.nih.gov/protein/XP_002298064.1?report=genbank&log$=prottop&blast_rank=56&RID=S1DSS3K4013","XP_002298064.1")
hypothetical protein [Datura stramonium]	Datura stramonium	781	781	0.93	0	88	483	https://www.ncbi.nlm.nih.gov/protein/MCD7464781.1?report=genbank&log$=prottop&blast_rank=57&RID=S1DSS3K4013","MCD7464781.1")
elongation factor Tu, chloroplastic [Vigna umbellata]	Vigna umbellata	780	780	0.94	0	86.59	484	https://www.ncbi.nlm.nih.gov/protein/XP_047179642.1?report=genbank&log$=prottop&blast_rank=58&RID=S1DSS3K4013","XP_047179642.1")
hypothetical protein DKX38_004514 [Salix brachista]	Salix brachista	779	779	0.94	0	87.33	483	https://www.ncbi.nlm.nih.gov/protein/KAB5564460.1?report=genbank&log$=prottop&blast_rank=59&RID=S1DSS3K4013","KAB5564460.1")
PREDICTED: elongation factor Tu, chloroplastic [Vigna angularis]	Vigna angularis	779	779	0.9	0	89.91	483	https://www.ncbi.nlm.nih.gov/protein/XP_017419715.1?report=genbank&log$=prottop&blast_rank=60&RID=S1DSS3K4013","XP_017419715.1")
elongation factor Tu, chloroplastic-like [Durio zibethinus]	Durio zibethinus	779	779	0.95	0	87.04	486	https://www.ncbi.nlm.nih.gov/protein/XP_022737231.1?report=genbank&log$=prottop&blast_rank=61&RID=S1DSS3K4013","XP_022737231.1")
hypothetical protein SADUNF_Sadunf03G0090100 [Salix dunnii]	Salix dunnii	779	779	0.93	0	87.87	483	https://www.ncbi.nlm.nih.gov/protein/KAF9685784.1?report=genbank&log$=prottop&blast_rank=62&RID=S1DSS3K4013","KAF9685784.1")
elongation factor Tu [Salix suchowensis]	Salix suchowensis	779	779	0.94	0	87.33	483	https://www.ncbi.nlm.nih.gov/protein/KAG5249275.1?report=genbank&log$=prottop&blast_rank=63&RID=S1DSS3K4013","KAG5249275.1")
PREDICTED: elongation factor TuA, chloroplastic [Ipomoea nil]	Ipomoea nil	778	778	0.95	0	87.34	477	https://www.ncbi.nlm.nih.gov/protein/XP_019181918.1?report=genbank&log$=prottop&blast_rank=64&RID=S1DSS3K4013","XP_019181918.1")
hypothetical protein L6164_011019 [Bauhinia variegata]	Bauhinia variegata	777	777	0.92	0	89.57	490	https://www.ncbi.nlm.nih.gov/protein/KAI4343701.1?report=genbank&log$=prottop&blast_rank=65&RID=S1DSS3K4013","KAI4343701.1")
Elongation factor Tu, chloroplastic [Capsicum annuum]	Capsicum annuum	777	777	1	0	83.82	479	https://www.ncbi.nlm.nih.gov/protein/KAF3679378.1?report=genbank&log$=prottop&blast_rank=66&RID=S1DSS3K4013","KAF3679378.1")
elongation factor Tu, chloroplastic-like [Hibiscus syriacus]	Hibiscus syriacus	776	776	0.96	0	85.14	481	https://www.ncbi.nlm.nih.gov/protein/XP_038999533.1?report=genbank&log$=prottop&blast_rank=67&RID=S1DSS3K4013","XP_038999533.1")
PREDICTED: elongation factor Tu, chloroplastic-like [Vitis vinifera]	Vitis vinifera	775	775	1	0	82.39	487	https://www.ncbi.nlm.nih.gov/protein/XP_003633809.1?report=genbank&log$=prottop&blast_rank=68&RID=S1DSS3K4013","XP_003633809.1")
hypothetical protein [Datura stramonium]	Datura stramonium	775	775	0.93	0	87.5	484	https://www.ncbi.nlm.nih.gov/protein/MCD7451640.1?report=genbank&log$=prottop&blast_rank=69&RID=S1DSS3K4013","MCD7451640.1")
Elongation factor Tu, chloroplastic [Capsicum annuum]	Capsicum annuum	775	775	1	0	83.61	479	https://www.ncbi.nlm.nih.gov/protein/KAF3676967.1?report=genbank&log$=prottop&blast_rank=70&RID=S1DSS3K4013","KAF3676967.1")
hypothetical protein H0E87_002784 [Populus deltoides]	Populus deltoides	775	775	0.86	0	92.21	483	https://www.ncbi.nlm.nih.gov/protein/KAH8521877.1?report=genbank&log$=prottop&blast_rank=71&RID=S1DSS3K4013","KAH8521877.1")
elongation factor TuB, chloroplastic [Camellia sinensis]	Camellia sinensis	775	775	0.94	0	88.38	550	https://www.ncbi.nlm.nih.gov/protein/XP_028089896.1?report=genbank&log$=prottop&blast_rank=72&RID=S1DSS3K4013","XP_028089896.1")
hypothetical protein F0562_024321 [Nyssa sinensis]	Nyssa sinensis	775	775	0.93	0	87.53	600	https://www.ncbi.nlm.nih.gov/protein/KAA8540760.1?report=genbank&log$=prottop&blast_rank=73&RID=S1DSS3K4013","KAA8540760.1")
PREDICTED: elongation factor Tu, chloroplastic-like [Populus euphratica]	Populus euphratica	775	775	0.94	0	87.78	483	https://www.ncbi.nlm.nih.gov/protein/XP_011029181.1?report=genbank&log$=prottop&blast_rank=74&RID=S1DSS3K4013","XP_011029181.1")
elongation factor TuB, chloroplastic [Quercus lobata]	Quercus lobata	775	775	0.97	0	83.86	482	https://www.ncbi.nlm.nih.gov/protein/XP_030938629.1?report=genbank&log$=prottop&blast_rank=75&RID=S1DSS3K4013","XP_030938629.1")
PREDICTED: elongation factor Tu, chloroplastic [Populus euphratica]	Populus euphratica	774	774	0.87	0	91.57	483	https://www.ncbi.nlm.nih.gov/protein/XP_011033799.1?report=genbank&log$=prottop&blast_rank=76&RID=S1DSS3K4013","XP_011033799.1")
elongation factor TuB, chloroplastic [Amborella trichopoda]	Amborella trichopoda	774	774	0.97	0	84.52	481	https://www.ncbi.nlm.nih.gov/protein/XP_006852378.1?report=genbank&log$=prottop&blast_rank=77&RID=S1DSS3K4013","XP_006852378.1")
hypothetical protein TEA_029583 [Camellia sinensis var. sinensis]	Camellia sinensis var. sinensis	774	774	0.94	0	88.38	483	https://www.ncbi.nlm.nih.gov/protein/THG04755.1?report=genbank&log$=prottop&blast_rank=78&RID=S1DSS3K4013","THG04755.1")
hypothetical protein KY289_017664 [Solanum tuberosum]	Solanum tuberosum	773	773	0.94	0	87.09	477	https://www.ncbi.nlm.nih.gov/protein/KAH0690306.1?report=genbank&log$=prottop&blast_rank=79&RID=S1DSS3K4013","KAH0690306.1")
elongation factor Tu, chloroplastic-like [Juglans microcarpa x Juglans regia]	Juglans microcarpa x Juglans regia	773	773	0.93	0	87.95	489	https://www.ncbi.nlm.nih.gov/protein/XP_040988829.1?report=genbank&log$=prottop&blast_rank=80&RID=S1DSS3K4013","XP_040988829.1")
RAB GTPase-like protein E1B [Perilla frutescens var. hirtella]	Perilla frutescens var. hirtella	773	773	0.96	0	88.15	473	https://www.ncbi.nlm.nih.gov/protein/KAH6770584.1?report=genbank&log$=prottop&blast_rank=81&RID=S1DSS3K4013","KAH6770584.1")
RAB GTPase-like protein E1B [Perilla frutescens var. frutescens]	Perilla frutescens var. frutescens	773	773	0.96	0	88.39	473	https://www.ncbi.nlm.nih.gov/protein/KAH6809417.1?report=genbank&log$=prottop&blast_rank=82&RID=S1DSS3K4013","KAH6809417.1")
Elongation factor Tu like [Actinidia chinensis var. chinensis]	Actinidia chinensis var. chinensis	773	773	0.98	0	84.96	470	https://www.ncbi.nlm.nih.gov/protein/PSR95898.1?report=genbank&log$=prottop&blast_rank=83&RID=S1DSS3K4013","PSR95898.1")
RAB GTPase homolog E1B [Actinidia rufa]	Actinidia rufa	773	773	0.98	0	82.99	504	https://www.ncbi.nlm.nih.gov/protein/GFZ07851.1?report=genbank&log$=prottop&blast_rank=84&RID=S1DSS3K4013","GFZ07851.1")
hypothetical protein H5410_017886 [Solanum commersonii]	Solanum commersonii	773	773	0.94	0	86.87	477	https://www.ncbi.nlm.nih.gov/protein/KAG5618062.1?report=genbank&log$=prottop&blast_rank=85&RID=S1DSS3K4013","KAG5618062.1")
elongation factor Tu, chloroplastic [Carya illinoinensis]	Carya illinoinensis	773	773	0.93	0	87.95	489	https://www.ncbi.nlm.nih.gov/protein/XP_042951645.1?report=genbank&log$=prottop&blast_rank=86&RID=S1DSS3K4013","XP_042951645.1")
elongation factor Tu, chloroplastic [Juglans regia]	Juglans regia	772	772	0.93	0	87.95	489	https://www.ncbi.nlm.nih.gov/protein/XP_018811726.1?report=genbank&log$=prottop&blast_rank=87&RID=S1DSS3K4013","XP_018811726.1")
hypothetical protein [Gossypium laxum]	Gossypium laxum	772	772	0.95	0	86.36	485	https://www.ncbi.nlm.nih.gov/protein/MBA0707820.1?report=genbank&log$=prottop&blast_rank=88&RID=S1DSS3K4013","MBA0707820.1")
hypothetical protein ES332_D03G137100v1 [Gossypium tomentosum]	Gossypium tomentosum	772	772	0.95	0	86.65	485	https://www.ncbi.nlm.nih.gov/protein/TYH80510.1?report=genbank&log$=prottop&blast_rank=89&RID=S1DSS3K4013","TYH80510.1")
hypothetical protein HYC85_004690 [Camellia sinensis]	Camellia sinensis	772	772	0.94	0	88.16	483	https://www.ncbi.nlm.nih.gov/protein/KAF5957465.1?report=genbank&log$=prottop&blast_rank=90&RID=S1DSS3K4013","KAF5957465.1")
elongation factor Tu, chloroplastic [Cajanus cajan]	Cajanus cajan	771	771	0.93	0	88.12	482	https://www.ncbi.nlm.nih.gov/protein/XP_020212522.1?report=genbank&log$=prottop&blast_rank=91&RID=S1DSS3K4013","XP_020212522.1")
elongation factor Tu, chloroplastic [Carica papaya]	Carica papaya	771	771	0.94	0	86.4	478	https://www.ncbi.nlm.nih.gov/protein/XP_021901610.1?report=genbank&log$=prottop&blast_rank=92&RID=S1DSS3K4013","XP_021901610.1")
elongation factor Tu, chloroplastic [Solanum stenotomum]	Solanum stenotomum	771	771	0.94	0	86.65	477	https://www.ncbi.nlm.nih.gov/protein/XP_049393380.1?report=genbank&log$=prottop&blast_rank=93&RID=S1DSS3K4013","XP_049393380.1")
PREDICTED: elongation factor Tu, chloroplastic [Gossypium raimondii]	Gossypium raimondii	771	771	0.95	0	86.36	485	https://www.ncbi.nlm.nih.gov/protein/XP_012471040.1?report=genbank&log$=prottop&blast_rank=94&RID=S1DSS3K4013","XP_012471040.1")
hypothetical protein [Gossypium harknessii]	Gossypium harknessii	771	771	0.95	0	86.87	456	https://www.ncbi.nlm.nih.gov/protein/MBA0794591.1?report=genbank&log$=prottop&blast_rank=95&RID=S1DSS3K4013","MBA0794591.1")
hypothetical protein KY285_018827 [Solanum tuberosum]	Solanum tuberosum	771	771	0.94	0	86.65	477	https://www.ncbi.nlm.nih.gov/protein/KAH0704549.1?report=genbank&log$=prottop&blast_rank=96&RID=S1DSS3K4013","KAH0704549.1")
elongation factor Tu, chloroplastic [Gossypium hirsutum]	Gossypium hirsutum	770	770	0.95	0	86.36	485	https://www.ncbi.nlm.nih.gov/protein/XP_016665575.1?report=genbank&log$=prottop&blast_rank=97&RID=S1DSS3K4013","XP_016665575.1")
elongation factor Tu, chloroplastic [Solanum verrucosum]	Solanum verrucosum	770	770	0.94	0	86.65	511	https://www.ncbi.nlm.nih.gov/protein/XP_049359312.1?report=genbank&log$=prottop&blast_rank=98&RID=S1DSS3K4013","XP_049359312.1")
hypothetical protein I3843_12G031200 [Carya illinoinensis]	Carya illinoinensis	770	770	0.93	0	87.72	489	https://www.ncbi.nlm.nih.gov/protein/KAG7951884.1?report=genbank&log$=prottop&blast_rank=99&RID=S1DSS3K4013","KAG7951884.1")
elongation factor Tu, chloroplastic-like [Juglans regia]	Juglans regia	769	769	0.93	0	87.36	492	https://www.ncbi.nlm.nih.gov/protein/XP_018840085.1?report=genbank&log$=prottop&blast_rank=100&RID=S1DSS3K4013","XP_018840085.1")

## Sheet: KZV24609.1
S1E43DAF013-Alignment-Descriptions
Description	Scientific Name	Max Score	Total Score	Query Cover	E value	Per. ident	Acc. Len	Accession
hypothetical protein F511_31501 [Dorcoceras hygrometricum]	Dorcoceras hygrometricum	1014	1014	1	0	99.8	503	https://www.ncbi.nlm.nih.gov/protein/KZV52907.1?report=genbank&log$=prottop&blast_rank=1&RID=S1E43DAF013","KZV52907.1")
hypothetical protein F511_06435 [Dorcoceras hygrometricum]	Dorcoceras hygrometricum	1014	1014	1	0	100	491	https://www.ncbi.nlm.nih.gov/protein/KZV24609.1?report=genbank&log$=prottop&blast_rank=2&RID=S1E43DAF013","KZV24609.1")
hypothetical protein Pfo_008633 [Paulownia fortunei]	Paulownia fortunei	759	759	0.99	0	73.78	496	https://www.ncbi.nlm.nih.gov/protein/KAI3451968.1?report=genbank&log$=prottop&blast_rank=3&RID=S1E43DAF013","KAI3451968.1")
cytochrome P450 [Perilla frutescens var. frutescens]	Perilla frutescens var. frutescens	739	739	0.99	0	70.18	497	https://www.ncbi.nlm.nih.gov/protein/KAH6803903.1?report=genbank&log$=prottop&blast_rank=4&RID=S1E43DAF013","KAH6803903.1")
cytochrome P450 [Perilla frutescens var. hirtella]	Perilla frutescens var. hirtella	724	724	0.99	0	69.57	499	https://www.ncbi.nlm.nih.gov/protein/KAH6823256.1?report=genbank&log$=prottop&blast_rank=5&RID=S1E43DAF013","KAH6823256.1")
cytochrome P450 [Perilla frutescens var. hirtella]	Perilla frutescens var. hirtella	723	723	0.99	0	69.57	499	https://www.ncbi.nlm.nih.gov/protein/KAH6784358.1?report=genbank&log$=prottop&blast_rank=6&RID=S1E43DAF013","KAH6784358.1")
hypothetical protein F511_25498 [Dorcoceras hygrometricum]	Dorcoceras hygrometricum	718	718	1	0	71.11	497	https://www.ncbi.nlm.nih.gov/protein/KZV55607.1?report=genbank&log$=prottop&blast_rank=7&RID=S1E43DAF013","KZV55607.1")
cytochrome P450 81D11-like [Sesamum indicum]	Sesamum indicum	717	717	0.97	0	69.04	503	https://www.ncbi.nlm.nih.gov/protein/XP_011078365.1?report=genbank&log$=prottop&blast_rank=8&RID=S1E43DAF013","XP_011078365.1")
cytochrome P450 81D11-like [Sesamum indicum]	Sesamum indicum	717	717	0.95	0	69.49	499	https://www.ncbi.nlm.nih.gov/protein/XP_011078366.1?report=genbank&log$=prottop&blast_rank=9&RID=S1E43DAF013","XP_011078366.1")
cytochrome p450 81d11 [Phtheirospermum japonicum]	Phtheirospermum japonicum	715	715	0.99	0	68.88	500	https://www.ncbi.nlm.nih.gov/protein/GFP96688.1?report=genbank&log$=prottop&blast_rank=10&RID=S1E43DAF013","GFP96688.1")
cytochrome P450 81E8-like [Olea europaea var. sylvestris]	Olea europaea var. sylvestris	713	713	0.99	0	68.09	499	https://www.ncbi.nlm.nih.gov/protein/XP_022843744.1?report=genbank&log$=prottop&blast_rank=11&RID=S1E43DAF013","XP_022843744.1")
cytochrome P450 [Perilla frutescens var. hirtella]	Perilla frutescens var. hirtella	709	709	0.99	0	68.22	498	https://www.ncbi.nlm.nih.gov/protein/KAH6823255.1?report=genbank&log$=prottop&blast_rank=12&RID=S1E43DAF013","KAH6823255.1")
hypothetical protein F511_03506 [Dorcoceras hygrometricum]	Dorcoceras hygrometricum	704	704	0.99	0	70.79	497	https://www.ncbi.nlm.nih.gov/protein/KZV24189.1?report=genbank&log$=prottop&blast_rank=13&RID=S1E43DAF013","KZV24189.1")
cytochrome P450 [Perilla frutescens var. hirtella]	Perilla frutescens var. hirtella	703	703	0.99	0	68.22	498	https://www.ncbi.nlm.nih.gov/protein/KAH6784359.1?report=genbank&log$=prottop&blast_rank=14&RID=S1E43DAF013","KAH6784359.1")
cytochrome P450 [Perilla frutescens var. frutescens]	Perilla frutescens var. frutescens	701	701	0.99	0	68.02	498	https://www.ncbi.nlm.nih.gov/protein/KAH6760234.1?report=genbank&log$=prottop&blast_rank=15&RID=S1E43DAF013","KAH6760234.1")
PREDICTED: cytochrome P450 81D11-like isoform X2 [Erythranthe guttata]	Erythranthe guttata	697	697	0.98	0	68.7	497	https://www.ncbi.nlm.nih.gov/protein/XP_012853764.1?report=genbank&log$=prottop&blast_rank=16&RID=S1E43DAF013","XP_012853764.1")
cytochrome P450 81D11-like [Sesamum indicum]	Sesamum indicum	696	696	0.95	0	69.43	499	https://www.ncbi.nlm.nih.gov/protein/XP_011078444.1?report=genbank&log$=prottop&blast_rank=17&RID=S1E43DAF013","XP_011078444.1")
cytochrome P450 [Perilla frutescens var. frutescens]	Perilla frutescens var. frutescens	696	696	0.99	0	69.37	499	https://www.ncbi.nlm.nih.gov/protein/KAH6760235.1?report=genbank&log$=prottop&blast_rank=18&RID=S1E43DAF013","KAH6760235.1")
cytochrome P450 81D11-like [Sesamum indicum]	Sesamum indicum	694	694	0.95	0	66.95	499	https://www.ncbi.nlm.nih.gov/protein/XP_011078364.1?report=genbank&log$=prottop&blast_rank=19&RID=S1E43DAF013","XP_011078364.1")
cytochrome P450 [Perilla frutescens var. frutescens]	Perilla frutescens var. frutescens	693	1149	0.95	0	70	782	https://www.ncbi.nlm.nih.gov/protein/KAH6803902.1?report=genbank&log$=prottop&blast_rank=20&RID=S1E43DAF013","KAH6803902.1")
PREDICTED: cytochrome P450 81D11-like isoform X1 [Erythranthe guttata]	Erythranthe guttata	692	692	0.98	0	68.29	497	https://www.ncbi.nlm.nih.gov/protein/XP_012853757.1?report=genbank&log$=prottop&blast_rank=21&RID=S1E43DAF013","XP_012853757.1")
cytochrome P450- family 81- subfamily D-polypeptide 5 [Striga hermonthica]	Striga hermonthica	690	690	0.99	0	66.73	498	https://www.ncbi.nlm.nih.gov/protein/CAA0841006.1?report=genbank&log$=prottop&blast_rank=22&RID=S1E43DAF013","CAA0841006.1")
cytochrome P450 81E8-like [Coffea eugenioides]	Coffea eugenioides	687	687	0.98	0	67.01	500	https://www.ncbi.nlm.nih.gov/protein/XP_027179576.1?report=genbank&log$=prottop&blast_rank=23&RID=S1E43DAF013","XP_027179576.1")
cytochrome P450 81E8-like [Coffea eugenioides]	Coffea eugenioides	687	687	0.98	0	67.01	493	https://www.ncbi.nlm.nih.gov/protein/XP_027179500.1?report=genbank&log$=prottop&blast_rank=24&RID=S1E43DAF013","XP_027179500.1")
cytochrome P450 81E8-like [Coffea arabica]	Coffea arabica	685	685	0.99	0	65.85	492	https://www.ncbi.nlm.nih.gov/protein/XP_027078996.1?report=genbank&log$=prottop&blast_rank=25&RID=S1E43DAF013","XP_027078996.1")
cytochrome P450 81E8-like [Coffea eugenioides]	Coffea eugenioides	683	683	0.99	0	65.65	492	https://www.ncbi.nlm.nih.gov/protein/XP_027178510.1?report=genbank&log$=prottop&blast_rank=26&RID=S1E43DAF013","XP_027178510.1")
PREDICTED: cytochrome P450 81E8-like [Erythranthe guttata]	Erythranthe guttata	683	683	0.98	0	67.89	497	https://www.ncbi.nlm.nih.gov/protein/XP_012853781.1?report=genbank&log$=prottop&blast_rank=27&RID=S1E43DAF013","XP_012853781.1")
cytochrome P450 81E8-like [Coffea arabica]	Coffea arabica	682	682	0.98	0	66.8	493	https://www.ncbi.nlm.nih.gov/protein/XP_027074370.1?report=genbank&log$=prottop&blast_rank=28&RID=S1E43DAF013","XP_027074370.1")
cytochrome P450 81E8-like [Olea europaea subsp. europaea]	Olea europaea subsp. europaea	677	677	1	0	66.6	496	https://www.ncbi.nlm.nih.gov/protein/CAA2986256.1?report=genbank&log$=prottop&blast_rank=29&RID=S1E43DAF013","CAA2986256.1")
cytochrome P450 81E8-like [Olea europaea subsp. europaea]	Olea europaea subsp. europaea	675	675	1	0	66.6	496	https://www.ncbi.nlm.nih.gov/protein/CAA2964771.1?report=genbank&log$=prottop&blast_rank=30&RID=S1E43DAF013","CAA2964771.1")
unnamed protein product [Coffea canephora]	Coffea canephora	675	675	0.98	0	65.78	500	https://www.ncbi.nlm.nih.gov/protein/CDP04571.1?report=genbank&log$=prottop&blast_rank=31&RID=S1E43DAF013","CDP04571.1")
cytochrome P450 81Q32-like [Salvia splendens]	Salvia splendens	674	674	0.99	0	63.49	495	https://www.ncbi.nlm.nih.gov/protein/XP_042062162.1?report=genbank&log$=prottop&blast_rank=32&RID=S1E43DAF013","XP_042062162.1")
cytochrome P450 81E8-like [Sesamum indicum]	Sesamum indicum	673	673	0.99	0	67.61	496	https://www.ncbi.nlm.nih.gov/protein/XP_011099348.1?report=genbank&log$=prottop&blast_rank=33&RID=S1E43DAF013","XP_011099348.1")
cytochrome P450 81E8-like [Coffea arabica]	Coffea arabica	673	673	0.99	0	65.04	492	https://www.ncbi.nlm.nih.gov/protein/XP_027075336.1?report=genbank&log$=prottop&blast_rank=34&RID=S1E43DAF013","XP_027075336.1")
cytochrome P450 81E8-like [Sesamum indicum]	Sesamum indicum	673	673	0.99	0	67.61	496	https://www.ncbi.nlm.nih.gov/protein/XP_011099350.1?report=genbank&log$=prottop&blast_rank=35&RID=S1E43DAF013","XP_011099350.1")
cytochrome P450 81E8-like [Olea europaea var. sylvestris]	Olea europaea var. sylvestris	673	673	1	0	66.4	496	https://www.ncbi.nlm.nih.gov/protein/XP_022854763.1?report=genbank&log$=prottop&blast_rank=36&RID=S1E43DAF013","XP_022854763.1")
hypothetical protein F0562_006334 [Nyssa sinensis]	Nyssa sinensis	672	672	0.99	0	66	497	https://www.ncbi.nlm.nih.gov/protein/KAA8531625.1?report=genbank&log$=prottop&blast_rank=37&RID=S1E43DAF013","KAA8531625.1")
hypothetical protein F0562_003619 [Nyssa sinensis]	Nyssa sinensis	672	672	0.99	0	65.72	494	https://www.ncbi.nlm.nih.gov/protein/KAA8547172.1?report=genbank&log$=prottop&blast_rank=38&RID=S1E43DAF013","KAA8547172.1")
unnamed protein product [Coffea canephora]	Coffea canephora	672	672	0.99	0	65.04	492	https://www.ncbi.nlm.nih.gov/protein/CDP04688.1?report=genbank&log$=prottop&blast_rank=39&RID=S1E43DAF013","CDP04688.1")
hypothetical protein BUALT_Bualt04G0106200 [Buddleja alternifolia]	Buddleja alternifolia	672	672	0.99	0	64.87	523	https://www.ncbi.nlm.nih.gov/protein/KAG8384322.1?report=genbank&log$=prottop&blast_rank=40&RID=S1E43DAF013","KAG8384322.1")
hypothetical protein F0562_006650 [Nyssa sinensis]	Nyssa sinensis	671	671	0.99	0	65.79	497	https://www.ncbi.nlm.nih.gov/protein/KAA8531633.1?report=genbank&log$=prottop&blast_rank=41&RID=S1E43DAF013","KAA8531633.1")
cytochrome P450- family 81- subfamily D-polypeptide 8 [Striga hermonthica]	Striga hermonthica	669	669	0.99	0	64.86	502	https://www.ncbi.nlm.nih.gov/protein/CAA0841007.1?report=genbank&log$=prottop&blast_rank=42&RID=S1E43DAF013","CAA0841007.1")
cytochrome P450, family 81, subfamily D, polypeptide 8 [Actinidia rufa]	Actinidia rufa	668	668	0.96	0	65.82	506	https://www.ncbi.nlm.nih.gov/protein/GFZ21444.1?report=genbank&log$=prottop&blast_rank=43&RID=S1E43DAF013","GFZ21444.1")
Cytochrome P450 superfamily protein [Perilla frutescens var. hirtella]	Perilla frutescens var. hirtella	668	668	0.99	0	67.27	499	https://www.ncbi.nlm.nih.gov/protein/KAH6823281.1?report=genbank&log$=prottop&blast_rank=44&RID=S1E43DAF013","KAH6823281.1")
cytochrome P450 81Q32-like [Salvia hispanica]	Salvia hispanica	667	667	0.99	0	62.68	491	https://www.ncbi.nlm.nih.gov/protein/XP_047948553.1?report=genbank&log$=prottop&blast_rank=45&RID=S1E43DAF013","XP_047948553.1")
Cytochrome P450 superfamily protein [Perilla frutescens var. frutescens]	Perilla frutescens var. frutescens	666	666	0.99	0	67.07	499	https://www.ncbi.nlm.nih.gov/protein/KAH6760232.1?report=genbank&log$=prottop&blast_rank=46&RID=S1E43DAF013","KAH6760232.1")
cytochrome P450- family 81- subfamily D-polypeptide 8 [Striga hermonthica]	Striga hermonthica	664	664	0.99	0	64.44	497	https://www.ncbi.nlm.nih.gov/protein/CAA0841008.1?report=genbank&log$=prottop&blast_rank=47&RID=S1E43DAF013","CAA0841008.1")
cytochrome P450, family 81, subfamily D, polypeptide 8 [Actinidia rufa]	Actinidia rufa	664	664	0.99	0	63.75	502	https://www.ncbi.nlm.nih.gov/protein/GFY86602.1?report=genbank&log$=prottop&blast_rank=48&RID=S1E43DAF013","GFY86602.1")
Cytochrome P450 81E8 like [Actinidia chinensis var. chinensis]	Actinidia chinensis var. chinensis	664	664	0.99	0	63.75	503	https://www.ncbi.nlm.nih.gov/protein/PSS30718.1?report=genbank&log$=prottop&blast_rank=49&RID=S1E43DAF013","PSS30718.1")
cytochrome P450 [Striga asiatica]	Striga asiatica	664	664	0.95	0	65.67	501	https://www.ncbi.nlm.nih.gov/protein/GER30932.1?report=genbank&log$=prottop&blast_rank=50&RID=S1E43DAF013","GER30932.1")
cytochrome P450 81E8-like [Camellia sinensis]	Camellia sinensis	664	664	0.98	0	63.64	506	https://www.ncbi.nlm.nih.gov/protein/XP_028051906.1?report=genbank&log$=prottop&blast_rank=51&RID=S1E43DAF013","XP_028051906.1")
cytochrome P450 [Perilla frutescens var. frutescens]	Perilla frutescens var. frutescens	663	663	0.99	0	66.87	499	https://www.ncbi.nlm.nih.gov/protein/KAH6803901.1?report=genbank&log$=prottop&blast_rank=52&RID=S1E43DAF013","KAH6803901.1")
cytochrome P450 [Striga asiatica]	Striga asiatica	663	663	0.99	0	63.27	513	https://www.ncbi.nlm.nih.gov/protein/GER49817.1?report=genbank&log$=prottop&blast_rank=53&RID=S1E43DAF013","GER49817.1")
Cytochrome P450 81Q32 [Camellia lanceoleosa]	Camellia lanceoleosa	662	662	0.97	0	64.03	505	https://www.ncbi.nlm.nih.gov/protein/KAI7984569.1?report=genbank&log$=prottop&blast_rank=54&RID=S1E43DAF013","KAI7984569.1")
cytochrome P450 81Q32-like [Salvia splendens]	Salvia splendens	662	662	1	0	64.24	491	https://www.ncbi.nlm.nih.gov/protein/XP_042060479.1?report=genbank&log$=prottop&blast_rank=55&RID=S1E43DAF013","XP_042060479.1")
cytochrome P450 81Q32-like [Salvia hispanica]	Salvia hispanica	661	661	0.99	0	64.1	491	https://www.ncbi.nlm.nih.gov/protein/XP_047948561.1?report=genbank&log$=prottop&blast_rank=56&RID=S1E43DAF013","XP_047948561.1")
cytochrome P450 81E8-like [Olea europaea subsp. europaea]	Olea europaea subsp. europaea	660	660	0.88	0	70.11	445	https://www.ncbi.nlm.nih.gov/protein/CAA3012142.1?report=genbank&log$=prottop&blast_rank=57&RID=S1E43DAF013","CAA3012142.1")
hypothetical protein F0562_006651 [Nyssa sinensis]	Nyssa sinensis	660	660	0.99	0	65.25	497	https://www.ncbi.nlm.nih.gov/protein/KAA8531632.1?report=genbank&log$=prottop&blast_rank=58&RID=S1E43DAF013","KAA8531632.1")
Cytochrome P450 81E8 like [Actinidia chinensis var. chinensis]	Actinidia chinensis var. chinensis	660	660	0.98	0	64.83	506	https://www.ncbi.nlm.nih.gov/protein/PSR87948.1?report=genbank&log$=prottop&blast_rank=59&RID=S1E43DAF013","PSR87948.1")
cytochrome P450 [Perilla frutescens var. hirtella]	Perilla frutescens var. hirtella	659	659	0.91	0	68.3	496	https://www.ncbi.nlm.nih.gov/protein/KAH6823254.1?report=genbank&log$=prottop&blast_rank=60&RID=S1E43DAF013","KAH6823254.1")
PREDICTED: cytochrome P450 81E8-like [Ipomoea nil]	Ipomoea nil	659	659	0.98	0	63.21	501	https://www.ncbi.nlm.nih.gov/protein/XP_019155057.1?report=genbank&log$=prottop&blast_rank=61&RID=S1E43DAF013","XP_019155057.1")
cytochrome P450 [Perilla frutescens var. hirtella]	Perilla frutescens var. hirtella	658	658	0.91	0	68.08	496	https://www.ncbi.nlm.nih.gov/protein/KAH6784360.1?report=genbank&log$=prottop&blast_rank=62&RID=S1E43DAF013","KAH6784360.1")
cytochrome P450 [Nothapodytes nimmoniana]	Nothapodytes nimmoniana	658	658	0.99	0	66.13	502	https://www.ncbi.nlm.nih.gov/protein/QNS30021.1?report=genbank&log$=prottop&blast_rank=63&RID=S1E43DAF013","QNS30021.1")
cytochrome P450 [Striga asiatica]	Striga asiatica	657	657	0.97	0	65.36	514	https://www.ncbi.nlm.nih.gov/protein/GER40634.1?report=genbank&log$=prottop&blast_rank=64&RID=S1E43DAF013","GER40634.1")
cytochrome P450 [Striga asiatica]	Striga asiatica	657	1182	0.99	0	64.2	903	https://www.ncbi.nlm.nih.gov/protein/GER30935.1?report=genbank&log$=prottop&blast_rank=65&RID=S1E43DAF013","GER30935.1")
cytochrome P450 [Perilla frutescens var. frutescens]	Perilla frutescens var. frutescens	657	657	0.91	0	68.08	496	https://www.ncbi.nlm.nih.gov/protein/KAH6760233.1?report=genbank&log$=prottop&blast_rank=66&RID=S1E43DAF013","KAH6760233.1")
hypothetical protein SASPL_118257 [Salvia splendens]	Salvia splendens	657	1303	1	0	62.99	990	https://www.ncbi.nlm.nih.gov/protein/KAG6421700.1?report=genbank&log$=prottop&blast_rank=67&RID=S1E43DAF013","KAG6421700.1")
cytochrome P450 81Q32-like [Salvia splendens]	Salvia splendens	657	657	0.99	0	63.08	491	https://www.ncbi.nlm.nih.gov/protein/XP_042057377.1?report=genbank&log$=prottop&blast_rank=68&RID=S1E43DAF013","XP_042057377.1")
cytochrome P450- family 81- subfamily D-polypeptide 2 [Striga hermonthica]	Striga hermonthica	655	655	0.97	0	65.08	503	https://www.ncbi.nlm.nih.gov/protein/CAA0841009.1?report=genbank&log$=prottop&blast_rank=69&RID=S1E43DAF013","CAA0841009.1")
Cytochrome P450 81E8 like [Actinidia chinensis var. chinensis]	Actinidia chinensis var. chinensis	655	655	0.99	0	63.88	504	https://www.ncbi.nlm.nih.gov/protein/PSR87947.1?report=genbank&log$=prottop&blast_rank=70&RID=S1E43DAF013","PSR87947.1")
cytochrome P450 81Q32-like [Andrographis paniculata]	Andrographis paniculata	654	654	0.94	0	65.02	508	https://www.ncbi.nlm.nih.gov/protein/XP_051127409.1?report=genbank&log$=prottop&blast_rank=71&RID=S1E43DAF013","XP_051127409.1")
hypothetical protein F0562_006333 [Nyssa sinensis]	Nyssa sinensis	654	654	0.94	0	67.02	497	https://www.ncbi.nlm.nih.gov/protein/KAA8531624.1?report=genbank&log$=prottop&blast_rank=72&RID=S1E43DAF013","KAA8531624.1")
hypothetical protein RHGRI_029328 [Rhododendron griersonianum]	Rhododendron griersonianum	654	654	0.99	0	61.17	505	https://www.ncbi.nlm.nih.gov/protein/KAG5528598.1?report=genbank&log$=prottop&blast_rank=73&RID=S1E43DAF013","KAG5528598.1")
hypothetical protein HYC85_031600 [Camellia sinensis]	Camellia sinensis	653	653	0.98	0	63.23	506	https://www.ncbi.nlm.nih.gov/protein/KAF5930727.1?report=genbank&log$=prottop&blast_rank=74&RID=S1E43DAF013","KAF5930727.1")
cytochrome P450 81Q32-like [Salvia hispanica]	Salvia hispanica	652	652	0.91	0	66.96	491	https://www.ncbi.nlm.nih.gov/protein/XP_047945778.1?report=genbank&log$=prottop&blast_rank=75&RID=S1E43DAF013","XP_047945778.1")
Cytochrome P450 81Q32 [Camellia lanceoleosa]	Camellia lanceoleosa	651	651	0.97	0	64.79	504	https://www.ncbi.nlm.nih.gov/protein/KAI8032581.1?report=genbank&log$=prottop&blast_rank=76&RID=S1E43DAF013","KAI8032581.1")
hypothetical protein RHMOL_Rhmol10G0142300 [Rhododendron molle]	Rhododendron molle	650	650	0.99	0	60.93	515	https://www.ncbi.nlm.nih.gov/protein/KAI8535018.1?report=genbank&log$=prottop&blast_rank=77&RID=S1E43DAF013","KAI8535018.1")
hypothetical protein C3L33_18401 [Rhododendron williamsianum]	Rhododendron williamsianum	649	649	0.99	0	60.76	499	https://www.ncbi.nlm.nih.gov/protein/KAE9449698.1?report=genbank&log$=prottop&blast_rank=78&RID=S1E43DAF013","KAE9449698.1")
cytochrome P450 81Q32-like [Ipomoea triloba]	Ipomoea triloba	649	649	0.97	0	62.42	499	https://www.ncbi.nlm.nih.gov/protein/XP_031109394.1?report=genbank&log$=prottop&blast_rank=79&RID=S1E43DAF013","XP_031109394.1")
RecName: Full=Cytochrome P450 81Q32; Short=CrCYP81Q32 [Catharanthus roseus]	Catharanthus roseus	648	648	0.99	0	61.89	499	https://www.ncbi.nlm.nih.gov/protein/W8JMU7.1?report=genbank&log$=prottop&blast_rank=80&RID=S1E43DAF013","W8JMU7.1")
cytochrome P450 81E8-like [Camellia sinensis]	Camellia sinensis	648	648	0.96	0	65.22	498	https://www.ncbi.nlm.nih.gov/protein/XP_028111951.1?report=genbank&log$=prottop&blast_rank=81&RID=S1E43DAF013","XP_028111951.1")
Cytochrome P450 superfamily protein [Perilla frutescens var. frutescens]	Perilla frutescens var. frutescens	647	647	0.85	0	70.95	424	https://www.ncbi.nlm.nih.gov/protein/KAH6803904.1?report=genbank&log$=prottop&blast_rank=82&RID=S1E43DAF013","KAH6803904.1")
Cytochrome P450 81Q32 [Camellia lanceoleosa]	Camellia lanceoleosa	647	647	0.96	0	64.2	498	https://www.ncbi.nlm.nih.gov/protein/KAI8031651.1?report=genbank&log$=prottop&blast_rank=83&RID=S1E43DAF013","KAI8031651.1")
Cytochrome P450 81Q32 [Camellia lanceoleosa]	Camellia lanceoleosa	647	647	0.95	0	64.76	497	https://www.ncbi.nlm.nih.gov/protein/KAI7979795.1?report=genbank&log$=prottop&blast_rank=84&RID=S1E43DAF013","KAI7979795.1")
cytochrome P450 81Q32-like [Salvia splendens]	Salvia splendens	645	645	0.91	0	65.85	490	https://www.ncbi.nlm.nih.gov/protein/XP_042062163.1?report=genbank&log$=prottop&blast_rank=85&RID=S1E43DAF013","XP_042062163.1")
isoflavone 3'-hydroxylase-like [Camellia sinensis]	Camellia sinensis	644	644	0.95	0	64.33	497	https://www.ncbi.nlm.nih.gov/protein/XP_028062692.1?report=genbank&log$=prottop&blast_rank=86&RID=S1E43DAF013","XP_028062692.1")
cytochrome P450 81E8-like [Camellia sinensis]	Camellia sinensis	644	644	0.96	0	64.79	506	https://www.ncbi.nlm.nih.gov/protein/XP_028085416.1?report=genbank&log$=prottop&blast_rank=87&RID=S1E43DAF013","XP_028085416.1")
PREDICTED: isoflavone 2'-hydroxylase-like [Nicotiana tabacum]	Nicotiana tabacum	643	643	0.99	0	60.81	498	https://www.ncbi.nlm.nih.gov/protein/XP_016459371.1?report=genbank&log$=prottop&blast_rank=88&RID=S1E43DAF013","XP_016459371.1")
cytochrome P450 81E8-like [Camellia sinensis]	Camellia sinensis	643	643	0.96	0	63.71	497	https://www.ncbi.nlm.nih.gov/protein/XP_028054199.1?report=genbank&log$=prottop&blast_rank=89&RID=S1E43DAF013","XP_028054199.1")
cytochrome P450 81Q32-like [Nicotiana tomentosiformis]	Nicotiana tomentosiformis	642	642	0.99	0	60.61	498	https://www.ncbi.nlm.nih.gov/protein/XP_009630633.1?report=genbank&log$=prottop&blast_rank=90&RID=S1E43DAF013","XP_009630633.1")
Cytochrome P450 81Q32 [Camellia lanceoleosa]	Camellia lanceoleosa	642	642	0.97	0	63.62	505	https://www.ncbi.nlm.nih.gov/protein/KAI7997197.1?report=genbank&log$=prottop&blast_rank=91&RID=S1E43DAF013","KAI7997197.1")
hypothetical protein HYC85_006025 [Camellia sinensis]	Camellia sinensis	642	642	0.95	0	63.91	497	https://www.ncbi.nlm.nih.gov/protein/KAF5958800.1?report=genbank&log$=prottop&blast_rank=92&RID=S1E43DAF013","KAF5958800.1")
cytochrome P450 CYP81Q43 [Salvia miltiorrhiza]	Salvia miltiorrhiza	641	641	1	0	64.59	494	https://www.ncbi.nlm.nih.gov/protein/AJD25199.1?report=genbank&log$=prottop&blast_rank=93&RID=S1E43DAF013","AJD25199.1")
hypothetical protein HYC85_021718 [Camellia sinensis]	Camellia sinensis	641	641	0.97	0	63.41	505	https://www.ncbi.nlm.nih.gov/protein/KAF5940551.1?report=genbank&log$=prottop&blast_rank=94&RID=S1E43DAF013","KAF5940551.1")
hypothetical protein Vadar_025232 [Vaccinium darrowii]	Vaccinium darrowii	640	640	0.98	0	62.01	499	https://www.ncbi.nlm.nih.gov/protein/KAH7847361.1?report=genbank&log$=prottop&blast_rank=95&RID=S1E43DAF013","KAH7847361.1")
hypothetical protein HYC85_006026 [Camellia sinensis]	Camellia sinensis	640	640	0.95	0	63.48	497	https://www.ncbi.nlm.nih.gov/protein/KAF5958801.1?report=genbank&log$=prottop&blast_rank=96&RID=S1E43DAF013","KAF5958801.1")
hypothetical protein TEA_003672 [Camellia sinensis var. sinensis]	Camellia sinensis var. sinensis	640	640	0.94	0	65.38	493	https://www.ncbi.nlm.nih.gov/protein/THG21369.1?report=genbank&log$=prottop&blast_rank=97&RID=S1E43DAF013","THG21369.1")
cytochrome P450 81E8-like [Camellia sinensis]	Camellia sinensis	640	640	0.97	0	63.2	505	https://www.ncbi.nlm.nih.gov/protein/XP_028076315.1?report=genbank&log$=prottop&blast_rank=98&RID=S1E43DAF013","XP_028076315.1")
cytochrome P450 81E8-like [Camellia sinensis]	Camellia sinensis	640	640	0.97	0	63.98	506	https://www.ncbi.nlm.nih.gov/protein/XP_028099883.1?report=genbank&log$=prottop&blast_rank=99&RID=S1E43DAF013","XP_028099883.1")
PREDICTED: LOW QUALITY PROTEIN: cytochrome P450 81D11-like [Nicotiana attenuata]	Nicotiana attenuata	637	637	0.99	0	59.96	499	https://www.ncbi.nlm.nih.gov/protein/XP_019232584.1?report=genbank&log$=prottop&blast_rank=100&RID=S1E43DAF013","XP_019232584.1")

## Sheet: KZV36516.1
S1E5S1RS016-Alignment-Descriptions
Description	Scientific Name	Max Score	Total Score	Query Cover	E value	Per. ident	Acc. Len	Accession
eukaryotic initiation factor 4A-14-like [Dorcoceras hygrometricum]	Dorcoceras hygrometricum	854	854	1	0	100	413	https://www.ncbi.nlm.nih.gov/protein/KZV36516.1?report=genbank&log$=prottop&blast_rank=1&RID=S1E5S1RS016","KZV36516.1")
eukaryotic initiation factor 4A-15-like [Dorcoceras hygrometricum]	Dorcoceras hygrometricum	838	838	1	0	97.58	413	https://www.ncbi.nlm.nih.gov/protein/KZV51860.1?report=genbank&log$=prottop&blast_rank=2&RID=S1E5S1RS016","KZV51860.1")
Eukaryotic initiation factor 4A-1 [Striga hermonthica]	Striga hermonthica	835	835	1	0	97.34	413	https://www.ncbi.nlm.nih.gov/protein/CAA0821289.1?report=genbank&log$=prottop&blast_rank=3&RID=S1E5S1RS016","CAA0821289.1")
eukaryotic initiation factor 4A-2 isoform X1 [Salvia splendens]	Salvia splendens	832	832	1	0	97.1	414	https://www.ncbi.nlm.nih.gov/protein/XP_041995190.1?report=genbank&log$=prottop&blast_rank=4&RID=S1E5S1RS016","XP_041995190.1")
hypothetical protein RHMOL_Rhmol11G0096000 [Rhododendron molle]	Rhododendron molle	832	832	1	0	96.86	425	https://www.ncbi.nlm.nih.gov/protein/KAI8530898.1?report=genbank&log$=prottop&blast_rank=5&RID=S1E5S1RS016","KAI8530898.1")
Eukaryotic initiation factor 4A-1 [Striga hermonthica]	Striga hermonthica	832	832	1	0	96.85	413	https://www.ncbi.nlm.nih.gov/protein/CAA0838415.1?report=genbank&log$=prottop&blast_rank=6&RID=S1E5S1RS016","CAA0838415.1")
hypothetical protein RHGRI_031336 [Rhododendron griersonianum]	Rhododendron griersonianum	832	832	1	0	96.86	425	https://www.ncbi.nlm.nih.gov/protein/KAG5524629.1?report=genbank&log$=prottop&blast_rank=7&RID=S1E5S1RS016","KAG5524629.1")
eukaryotic initiation factor 4A [Striga asiatica]	Striga asiatica	831	831	1	0	96.85	413	https://www.ncbi.nlm.nih.gov/protein/GER32095.1?report=genbank&log$=prottop&blast_rank=8&RID=S1E5S1RS016","GER32095.1")
hypothetical protein RHSIM_RhsimUnG0103600 [Rhododendron simsii]	Rhododendron simsii	831	831	1	0	96.86	414	https://www.ncbi.nlm.nih.gov/protein/KAF7113898.1?report=genbank&log$=prottop&blast_rank=9&RID=S1E5S1RS016","KAF7113898.1")
hypothetical protein Pfo_010821 [Paulownia fortunei]	Paulownia fortunei	831	831	1	0	96.85	413	https://www.ncbi.nlm.nih.gov/protein/KAI3454158.1?report=genbank&log$=prottop&blast_rank=10&RID=S1E5S1RS016","KAI3454158.1")
hypothetical protein Vadar_008461 [Vaccinium darrowii]	Vaccinium darrowii	830	830	1	0	97.1	414	https://www.ncbi.nlm.nih.gov/protein/KAH7833652.1?report=genbank&log$=prottop&blast_rank=11&RID=S1E5S1RS016","KAH7833652.1")
hypothetical protein C3L33_21791 [Rhododendron williamsianum]	Rhododendron williamsianum	830	830	1	0	96.86	450	https://www.ncbi.nlm.nih.gov/protein/KAE9446309.1?report=genbank&log$=prottop&blast_rank=12&RID=S1E5S1RS016","KAE9446309.1")
hypothetical protein C3L33_21958 [Rhododendron williamsianum]	Rhododendron williamsianum	830	830	1	0	96.86	414	https://www.ncbi.nlm.nih.gov/protein/KAE9446144.1?report=genbank&log$=prottop&blast_rank=13&RID=S1E5S1RS016","KAE9446144.1")
Translation initiation factor 4F, helicase subunit (eIF-4A) [Handroanthus impetiginosus]	Handroanthus impetiginosus	830	830	1	0	96.85	413	https://www.ncbi.nlm.nih.gov/protein/PIN02086.1?report=genbank&log$=prottop&blast_rank=14&RID=S1E5S1RS016","PIN02086.1")
eukaryotic initiation factor 4A-2-like [Salvia hispanica]	Salvia hispanica	830	830	1	0	96.86	414	https://www.ncbi.nlm.nih.gov/protein/XP_047952588.1?report=genbank&log$=prottop&blast_rank=15&RID=S1E5S1RS016","XP_047952588.1")
Translation initiation factor 4F, helicase subunit (eIF-4A) [Handroanthus impetiginosus]	Handroanthus impetiginosus	830	830	1	0	96.37	413	https://www.ncbi.nlm.nih.gov/protein/PIN13239.1?report=genbank&log$=prottop&blast_rank=16&RID=S1E5S1RS016","PIN13239.1")
eukaryotic initiation factor 4A-14 [Sesamum indicum]	Sesamum indicum	830	830	1	0	96.13	413	https://www.ncbi.nlm.nih.gov/protein/XP_011100200.1?report=genbank&log$=prottop&blast_rank=17&RID=S1E5S1RS016","XP_011100200.1")
hypothetical protein RHSIM_Rhsim10G0168300 [Rhododendron simsii]	Rhododendron simsii	830	830	1	0	96.62	414	https://www.ncbi.nlm.nih.gov/protein/KAF7129665.1?report=genbank&log$=prottop&blast_rank=18&RID=S1E5S1RS016","KAF7129665.1")
hypothetical protein Pfo_024768 [Paulownia fortunei]	Paulownia fortunei	830	830	1	0	96.13	413	https://www.ncbi.nlm.nih.gov/protein/KAI3468105.1?report=genbank&log$=prottop&blast_rank=19&RID=S1E5S1RS016","KAI3468105.1")
eukaryotic initiation factor 4A-2-like [Salvia splendens]	Salvia splendens	830	830	1	0	96.86	414	https://www.ncbi.nlm.nih.gov/protein/XP_041991635.1?report=genbank&log$=prottop&blast_rank=20&RID=S1E5S1RS016","XP_041991635.1")
hypothetical protein RHMOL_Rhmol11G0096300 [Rhododendron molle]	Rhododendron molle	829	829	1	0	96.38	551	https://www.ncbi.nlm.nih.gov/protein/KAI8530901.1?report=genbank&log$=prottop&blast_rank=21&RID=S1E5S1RS016","KAI8530901.1")
eukaryotic translation initiation factor 4A1 [Perilla frutescens var. frutescens]	Perilla frutescens var. frutescens	829	829	1	0	96.61	413	https://www.ncbi.nlm.nih.gov/protein/KAH6774186.1?report=genbank&log$=prottop&blast_rank=22&RID=S1E5S1RS016","KAH6774186.1")
eukaryotic initiation factor 4A-2 [Carya illinoinensis]	Carya illinoinensis	829	829	1	0	96.37	413	https://www.ncbi.nlm.nih.gov/protein/XP_042965122.1?report=genbank&log$=prottop&blast_rank=23&RID=S1E5S1RS016","XP_042965122.1")
hypothetical protein RHMOL_Rhmol11G0096400 [Rhododendron molle]	Rhododendron molle	829	829	1	0	96.14	441	https://www.ncbi.nlm.nih.gov/protein/KAI8530902.1?report=genbank&log$=prottop&blast_rank=24&RID=S1E5S1RS016","KAI8530902.1")
eukaryotic initiation factor 4A-2-like [Salvia splendens]	Salvia splendens	829	829	1	0	97.1	414	https://www.ncbi.nlm.nih.gov/protein/XP_042033402.1?report=genbank&log$=prottop&blast_rank=25&RID=S1E5S1RS016","XP_042033402.1")
hypothetical protein RHSIM_Rhsim11G0041900 [Rhododendron simsii]	Rhododendron simsii	828	828	1	0	96.62	414	https://www.ncbi.nlm.nih.gov/protein/KAF7126858.1?report=genbank&log$=prottop&blast_rank=26&RID=S1E5S1RS016","KAF7126858.1")
eukaryotic initiation factor 4A-14 [Salvia hispanica]	Salvia hispanica	828	828	1	0	97.1	414	https://www.ncbi.nlm.nih.gov/protein/XP_047970064.1?report=genbank&log$=prottop&blast_rank=27&RID=S1E5S1RS016","XP_047970064.1")
eukaryotic initiation factor 4A-2 [Sesamum indicum]	Sesamum indicum	828	828	1	0	96.37	413	https://www.ncbi.nlm.nih.gov/protein/XP_011081667.1?report=genbank&log$=prottop&blast_rank=28&RID=S1E5S1RS016","XP_011081667.1")
PREDICTED: eukaryotic initiation factor 4A-2-like [Daucus carota subsp. sativus]	Daucus carota subsp. sativus	828	828	1	0	96.61	413	https://www.ncbi.nlm.nih.gov/protein/XP_017229733.1?report=genbank&log$=prottop&blast_rank=29&RID=S1E5S1RS016","XP_017229733.1")
hypothetical protein KY289_033276 [Solanum tuberosum]	Solanum tuberosum	828	828	1	0	96.37	426	https://www.ncbi.nlm.nih.gov/protein/KAH0642302.1?report=genbank&log$=prottop&blast_rank=30&RID=S1E5S1RS016","KAH0642302.1")
hypothetical protein RHGRI_031341 [Rhododendron griersonianum]	Rhododendron griersonianum	828	828	1	0	96.38	417	https://www.ncbi.nlm.nih.gov/protein/KAG5524635.1?report=genbank&log$=prottop&blast_rank=31&RID=S1E5S1RS016","KAG5524635.1")
eukaryotic translation initiation factor 4A1 [Perilla frutescens var. frutescens]	Perilla frutescens var. frutescens	828	828	1	0	96.61	413	https://www.ncbi.nlm.nih.gov/protein/KAH6790836.1?report=genbank&log$=prottop&blast_rank=32&RID=S1E5S1RS016","KAH6790836.1")
hypothetical protein L6164_024486 [Bauhinia variegata]	Bauhinia variegata	828	828	1	0	95.88	413	https://www.ncbi.nlm.nih.gov/protein/KAI4316506.1?report=genbank&log$=prottop&blast_rank=33&RID=S1E5S1RS016","KAI4316506.1")
eukaryotic initiation factor 4A-2-like [Salvia splendens]	Salvia splendens	828	828	1	0	96.62	414	https://www.ncbi.nlm.nih.gov/protein/XP_042066819.1?report=genbank&log$=prottop&blast_rank=34&RID=S1E5S1RS016","XP_042066819.1")
hypothetical protein Vadar_019065 [Vaccinium darrowii]	Vaccinium darrowii	828	828	1	0	96.38	453	https://www.ncbi.nlm.nih.gov/protein/KAH7834734.1?report=genbank&log$=prottop&blast_rank=35&RID=S1E5S1RS016","KAH7834734.1")
PREDICTED: eukaryotic initiation factor 4A-2 [Daucus carota subsp. sativus]	Daucus carota subsp. sativus	828	828	1	0	96.61	413	https://www.ncbi.nlm.nih.gov/protein/XP_017230682.1?report=genbank&log$=prottop&blast_rank=36&RID=S1E5S1RS016","XP_017230682.1")
eukaryotic initiation factor 4A-2 [Solanum lycopersicum]	Solanum lycopersicum	827	827	1	0	96.37	413	https://www.ncbi.nlm.nih.gov/protein/XP_004245077.1?report=genbank&log$=prottop&blast_rank=37&RID=S1E5S1RS016","XP_004245077.1")
hypothetical protein RHGRI_031342 [Rhododendron griersonianum]	Rhododendron griersonianum	827	827	1	0	96.38	478	https://www.ncbi.nlm.nih.gov/protein/KAG5524636.1?report=genbank&log$=prottop&blast_rank=38&RID=S1E5S1RS016","KAG5524636.1")
eukaryotic initiation factor 4A-2-like [Salvia hispanica]	Salvia hispanica	827	827	1	0	96.62	414	https://www.ncbi.nlm.nih.gov/protein/XP_047943997.1?report=genbank&log$=prottop&blast_rank=39&RID=S1E5S1RS016","XP_047943997.1")
hypothetical protein RHGRI_031341 [Rhododendron griersonianum]	Rhododendron griersonianum	827	827	1	0	96.38	414	https://www.ncbi.nlm.nih.gov/protein/KAG5524634.1?report=genbank&log$=prottop&blast_rank=40&RID=S1E5S1RS016","KAG5524634.1")
eukaryotic initiation factor 4A-11 [Prosopis alba]	Prosopis alba	827	827	1	0	95.88	413	https://www.ncbi.nlm.nih.gov/protein/XP_028777333.1?report=genbank&log$=prottop&blast_rank=41&RID=S1E5S1RS016","XP_028777333.1")
eukaryotic initiation factor 4A-2 [Juglans regia]	Juglans regia	827	827	1	0	96.13	413	https://www.ncbi.nlm.nih.gov/protein/XP_018844689.1?report=genbank&log$=prottop&blast_rank=42&RID=S1E5S1RS016","XP_018844689.1")
eukaryotic initiation factor 4A-2-like [Solanum pennellii]	Solanum pennellii	827	827	1	0	96.13	413	https://www.ncbi.nlm.nih.gov/protein/XP_015085128.1?report=genbank&log$=prottop&blast_rank=43&RID=S1E5S1RS016","XP_015085128.1")
eukaryotic initiation factor 4A-2-like [Salvia splendens]	Salvia splendens	827	827	1	0	96.62	414	https://www.ncbi.nlm.nih.gov/protein/XP_042060827.1?report=genbank&log$=prottop&blast_rank=44&RID=S1E5S1RS016","XP_042060827.1")
hypothetical protein Leryth_000565 [Lithospermum erythrorhizon]	Lithospermum erythrorhizon	827	827	1	0	96.61	413	https://www.ncbi.nlm.nih.gov/protein/KAG9154062.1?report=genbank&log$=prottop&blast_rank=45&RID=S1E5S1RS016","KAG9154062.1")
hypothetical protein BUALT_Bualt05G0008800 [Buddleja alternifolia]	Buddleja alternifolia	827	827	1	0	96.13	432	https://www.ncbi.nlm.nih.gov/protein/KAG8381784.1?report=genbank&log$=prottop&blast_rank=46&RID=S1E5S1RS016","KAG8381784.1")
PREDICTED: eukaryotic initiation factor 4A-14-like [Nicotiana sylvestris]	Nicotiana sylvestris	826	826	1	0	96.13	413	https://www.ncbi.nlm.nih.gov/protein/XP_009780782.1?report=genbank&log$=prottop&blast_rank=47&RID=S1E5S1RS016","XP_009780782.1")
hypothetical protein M9H77_19530 [Catharanthus roseus]	Catharanthus roseus	826	826	1	0	96.13	413	https://www.ncbi.nlm.nih.gov/protein/KAI5669677.1?report=genbank&log$=prottop&blast_rank=48&RID=S1E5S1RS016","KAI5669677.1")
eukaryotic initiation factor 4A-14 [Coffea arabica]	Coffea arabica	826	826	1	0	96.38	414	https://www.ncbi.nlm.nih.gov/protein/XP_027083966.1?report=genbank&log$=prottop&blast_rank=49&RID=S1E5S1RS016","XP_027083966.1")
eukaryotic initiation factor 4A-14-like [Coffea arabica]	Coffea arabica	825	825	1	0	96.38	414	https://www.ncbi.nlm.nih.gov/protein/XP_027079760.1?report=genbank&log$=prottop&blast_rank=50&RID=S1E5S1RS016","XP_027079760.1")
eukaryotic initiation factor 4A-11 [Senna tora]	Senna tora	825	825	1	0	95.4	413	https://www.ncbi.nlm.nih.gov/protein/KAF7830451.1?report=genbank&log$=prottop&blast_rank=51&RID=S1E5S1RS016","KAF7830451.1")
eukaryotic initiation factor 4A-14 [Nicotiana benthamiana]	Nicotiana benthamiana	825	825	1	0	95.88	413	https://www.ncbi.nlm.nih.gov/protein/AFC90091.1?report=genbank&log$=prottop&blast_rank=52&RID=S1E5S1RS016","AFC90091.1")
PREDICTED: eukaryotic initiation factor 4A-2 [Solanum tuberosum]	Solanum tuberosum	825	825	1	0	96.13	413	https://www.ncbi.nlm.nih.gov/protein/XP_006342504.1?report=genbank&log$=prottop&blast_rank=53&RID=S1E5S1RS016","XP_006342504.1")
hypothetical protein FH972_017976 [Carpinus fangiana]	Carpinus fangiana	825	825	1	0	95.64	413	https://www.ncbi.nlm.nih.gov/protein/KAE8100043.1?report=genbank&log$=prottop&blast_rank=54&RID=S1E5S1RS016","KAE8100043.1")
eukaryotic initiation factor 4A-11 [Ipomoea triloba]	Ipomoea triloba	824	824	1	0	96.37	413	https://www.ncbi.nlm.nih.gov/protein/XP_031102947.1?report=genbank&log$=prottop&blast_rank=55&RID=S1E5S1RS016","XP_031102947.1")
eukaryotic initiation factor 4a-2 [Phtheirospermum japonicum]	Phtheirospermum japonicum	824	824	1	0	95.88	413	https://www.ncbi.nlm.nih.gov/protein/GFQ06681.1?report=genbank&log$=prottop&blast_rank=56&RID=S1E5S1RS016","GFQ06681.1")
eukaryotic initiation factor 4A-2 isoform X1 [Solanum verrucosum]	Solanum verrucosum	824	824	1	0	95.88	413	https://www.ncbi.nlm.nih.gov/protein/XP_049355671.1?report=genbank&log$=prottop&blast_rank=57&RID=S1E5S1RS016","XP_049355671.1")
PREDICTED: eukaryotic initiation factor 4A-9-like [Nicotiana tabacum]	Nicotiana tabacum	824	824	1	0	95.64	413	https://www.ncbi.nlm.nih.gov/protein/XP_016453107.1?report=genbank&log$=prottop&blast_rank=58&RID=S1E5S1RS016","XP_016453107.1")
hypothetical protein K1719_010611 [Acacia pycnantha]	Acacia pycnantha	824	824	1	0	95.4	413	https://www.ncbi.nlm.nih.gov/protein/KAI9118279.1?report=genbank&log$=prottop&blast_rank=59&RID=S1E5S1RS016","KAI9118279.1")
PREDICTED: eukaryotic initiation factor 4A-14 [Nicotiana sylvestris]	Nicotiana sylvestris	824	824	1	0	95.88	413	https://www.ncbi.nlm.nih.gov/protein/XP_009784285.1?report=genbank&log$=prottop&blast_rank=60&RID=S1E5S1RS016","XP_009784285.1")
eukaryotic initiation factor 4A-15 [Carya illinoinensis]	Carya illinoinensis	824	824	1	0	95.4	413	https://www.ncbi.nlm.nih.gov/protein/XP_042972482.1?report=genbank&log$=prottop&blast_rank=61&RID=S1E5S1RS016","XP_042972482.1")
hypothetical protein [Datura stramonium]	Datura stramonium	824	824	1	0	95.64	421	https://www.ncbi.nlm.nih.gov/protein/MCD7459262.1?report=genbank&log$=prottop&blast_rank=62&RID=S1E5S1RS016","MCD7459262.1")
hypothetical protein RHSIM_Rhsim11G0042000 [Rhododendron simsii]	Rhododendron simsii	824	824	1	0	95.89	448	https://www.ncbi.nlm.nih.gov/protein/KAF7127340.1?report=genbank&log$=prottop&blast_rank=63&RID=S1E5S1RS016","KAF7127340.1")
eukaryotic initiation factor 4a-11 [Quercus suber]	Quercus suber	824	824	1	0	95.4	464	https://www.ncbi.nlm.nih.gov/protein/POE79143.1?report=genbank&log$=prottop&blast_rank=64&RID=S1E5S1RS016","POE79143.1")
Eukaryotic initiation factor 4A-14 [Actinidia chinensis var. chinensis]	Actinidia chinensis var. chinensis	824	824	1	0	96.14	414	https://www.ncbi.nlm.nih.gov/protein/PSR91735.1?report=genbank&log$=prottop&blast_rank=65&RID=S1E5S1RS016","PSR91735.1")
eukaryotic initiation factor 4A-2 [Olea europaea var. sylvestris]	Olea europaea var. sylvestris	824	824	1	0	96.14	414	https://www.ncbi.nlm.nih.gov/protein/XP_022855433.1?report=genbank&log$=prottop&blast_rank=66&RID=S1E5S1RS016","XP_022855433.1")
hypothetical protein CMV_011013 [Castanea mollissima]	Castanea mollissima	823	823	1	0	95.64	441	https://www.ncbi.nlm.nih.gov/protein/KAF3964719.1?report=genbank&log$=prottop&blast_rank=67&RID=S1E5S1RS016","KAF3964719.1")
eukaryotic initiation factor 4A-11 [Nicotiana tomentosiformis]	Nicotiana tomentosiformis	823	823	1	0	95.88	413	https://www.ncbi.nlm.nih.gov/protein/XP_009602748.1?report=genbank&log$=prottop&blast_rank=68&RID=S1E5S1RS016","XP_009602748.1")
hypothetical protein TEA_020752 [Camellia sinensis var. sinensis]	Camellia sinensis var. sinensis	823	823	1	0	95.89	447	https://www.ncbi.nlm.nih.gov/protein/THG02641.1?report=genbank&log$=prottop&blast_rank=69&RID=S1E5S1RS016","THG02641.1")
Eukaryotic initiation factor 4A-14 [Actinidia chinensis var. chinensis]	Actinidia chinensis var. chinensis	823	823	1	0	95.65	414	https://www.ncbi.nlm.nih.gov/protein/PSS01262.1?report=genbank&log$=prottop&blast_rank=70&RID=S1E5S1RS016","PSS01262.1")
hypothetical protein VITISV_040122 [Vitis vinifera]	Vitis vinifera	823	823	1	0	95.88	413	https://www.ncbi.nlm.nih.gov/protein/CAN61608.1?report=genbank&log$=prottop&blast_rank=71&RID=S1E5S1RS016","CAN61608.1")
hypothetical protein COLO4_21086 [Corchorus olitorius]	Corchorus olitorius	823	823	1	0	95.16	413	https://www.ncbi.nlm.nih.gov/protein/OMO86540.1?report=genbank&log$=prottop&blast_rank=72&RID=S1E5S1RS016","OMO86540.1")
eukaryotic initiation factor 4A-2 [Solanum lycopersicum]	Solanum lycopersicum	823	823	1	0	95.64	413	https://www.ncbi.nlm.nih.gov/protein/XP_004253093.1?report=genbank&log$=prottop&blast_rank=73&RID=S1E5S1RS016","XP_004253093.1")
hypothetical protein L6164_015604 [Bauhinia variegata]	Bauhinia variegata	823	823	1	0	95.4	413	https://www.ncbi.nlm.nih.gov/protein/KAI4337156.1?report=genbank&log$=prottop&blast_rank=74&RID=S1E5S1RS016","KAI4337156.1")
eukaryotic initiation factor 4A-10 isoform X1 [Nicotiana tomentosiformis]	Nicotiana tomentosiformis	823	823	1	0	95.88	413	https://www.ncbi.nlm.nih.gov/protein/XP_009604758.1?report=genbank&log$=prottop&blast_rank=75&RID=S1E5S1RS016","XP_009604758.1")
PREDICTED: eukaryotic initiation factor 4A-11-like [Ipomoea nil]	Ipomoea nil	823	823	1	0	96.13	413	https://www.ncbi.nlm.nih.gov/protein/XP_019196821.1?report=genbank&log$=prottop&blast_rank=76&RID=S1E5S1RS016","XP_019196821.1")
PREDICTED: eukaryotic initiation factor 4A-2 [Erythranthe guttata]	Erythranthe guttata	823	823	1	0	95.88	413	https://www.ncbi.nlm.nih.gov/protein/XP_012847099.1?report=genbank&log$=prottop&blast_rank=77&RID=S1E5S1RS016","XP_012847099.1")
eukaryotic initiation factor 4A-6-like [Ipomoea triloba]	Ipomoea triloba	823	823	1	0	96.14	414	https://www.ncbi.nlm.nih.gov/protein/XP_031109123.1?report=genbank&log$=prottop&blast_rank=78&RID=S1E5S1RS016","XP_031109123.1")
hypothetical protein AG4045_014591 [Apium graveolens]	Apium graveolens	823	823	1	0	95.88	413	https://www.ncbi.nlm.nih.gov/protein/KAF1002905.1?report=genbank&log$=prottop&blast_rank=79&RID=S1E5S1RS016","KAF1002905.1")
Eukaryotic initiation factor 4A-11 [Vitis vinifera]	Vitis vinifera	823	823	1	0	95.64	423	https://www.ncbi.nlm.nih.gov/protein/RVW52337.1?report=genbank&log$=prottop&blast_rank=80&RID=S1E5S1RS016","RVW52337.1")
eukaryotic initiation factor 4A-2 [Tripterygium wilfordii]	Tripterygium wilfordii	823	823	1	0	95.88	417	https://www.ncbi.nlm.nih.gov/protein/KAF5743176.1?report=genbank&log$=prottop&blast_rank=81&RID=S1E5S1RS016","KAF5743176.1")
Eukaryotic initiation factor 4A-15 [Morella rubra]	Morella rubra	823	823	1	0	95.4	413	https://www.ncbi.nlm.nih.gov/protein/KAB1209355.1?report=genbank&log$=prottop&blast_rank=82&RID=S1E5S1RS016","KAB1209355.1")
eukaryotic initiation factor 4A-10-like [Camellia sinensis]	Camellia sinensis	823	823	1	0	96.13	413	https://www.ncbi.nlm.nih.gov/protein/XP_028058558.1?report=genbank&log$=prottop&blast_rank=83&RID=S1E5S1RS016","XP_028058558.1")
eukaryotic initiation factor 4A-2 [Prosopis alba]	Prosopis alba	823	823	1	0	95.4	413	https://www.ncbi.nlm.nih.gov/protein/XP_028807042.1?report=genbank&log$=prottop&blast_rank=84&RID=S1E5S1RS016","XP_028807042.1")
PREDICTED: eukaryotic initiation factor 4A-2-like [Ipomoea nil]	Ipomoea nil	823	823	1	0	95.64	413	https://www.ncbi.nlm.nih.gov/protein/XP_019191880.1?report=genbank&log$=prottop&blast_rank=85&RID=S1E5S1RS016","XP_019191880.1")
PREDICTED: eukaryotic initiation factor 4A-11 [Nicotiana attenuata]	Nicotiana attenuata	823	823	1	0	95.88	413	https://www.ncbi.nlm.nih.gov/protein/XP_019260226.1?report=genbank&log$=prottop&blast_rank=86&RID=S1E5S1RS016","XP_019260226.1")
Eukaryotic initiation factor 4A-2 [Capsicum annuum]	Capsicum annuum	823	823	1	0	95.64	418	https://www.ncbi.nlm.nih.gov/protein/PHT66614.1?report=genbank&log$=prottop&blast_rank=87&RID=S1E5S1RS016","PHT66614.1")
hypothetical protein BUALT_Bualt10G0126800 [Buddleja alternifolia]	Buddleja alternifolia	822	822	1	0	96.38	414	https://www.ncbi.nlm.nih.gov/protein/KAG8375692.1?report=genbank&log$=prottop&blast_rank=88&RID=S1E5S1RS016","KAG8375692.1")
eukaryotic initiation factor 4A-2 [Capsicum annuum]	Capsicum annuum	822	822	1	0	95.64	413	https://www.ncbi.nlm.nih.gov/protein/XP_047257190.1?report=genbank&log$=prottop&blast_rank=89&RID=S1E5S1RS016","XP_047257190.1")
hypothetical protein RHSIM_Rhsim11G0041300 [Rhododendron simsii]	Rhododendron simsii	822	822	1	0	96.38	412	https://www.ncbi.nlm.nih.gov/protein/KAF7127473.1?report=genbank&log$=prottop&blast_rank=90&RID=S1E5S1RS016","KAF7127473.1")
eukaryotic translation initiation factor 4A [Nicotiana benthamiana]	Nicotiana benthamiana	822	822	1	0	95.64	413	https://www.ncbi.nlm.nih.gov/protein/ALJ94093.1?report=genbank&log$=prottop&blast_rank=91&RID=S1E5S1RS016","ALJ94093.1")
eukaryotic initiation factor 4A-11 [Cajanus cajan]	Cajanus cajan	822	822	1	0	95.64	413	https://www.ncbi.nlm.nih.gov/protein/XP_020211988.1?report=genbank&log$=prottop&blast_rank=92&RID=S1E5S1RS016","XP_020211988.1")
eukaryotic initiation factor 4A-2 [Tripterygium wilfordii]	Tripterygium wilfordii	822	822	1	0	95.88	413	https://www.ncbi.nlm.nih.gov/protein/XP_038711660.1?report=genbank&log$=prottop&blast_rank=93&RID=S1E5S1RS016","XP_038711660.1")
Eukaryotic initiation factor [Trema orientale]	Trema orientale	822	822	1	0	95.64	413	https://www.ncbi.nlm.nih.gov/protein/PON95995.1?report=genbank&log$=prottop&blast_rank=94&RID=S1E5S1RS016","PON95995.1")
PREDICTED: eukaryotic initiation factor 4A-14 [Ipomoea nil]	Ipomoea nil	822	822	1	0	95.64	413	https://www.ncbi.nlm.nih.gov/protein/XP_019154067.1?report=genbank&log$=prottop&blast_rank=95&RID=S1E5S1RS016","XP_019154067.1")
eukaryotic initiation factor 4A-8 [Asparagus officinalis]	Asparagus officinalis	822	822	1	0	95.64	413	https://www.ncbi.nlm.nih.gov/protein/XP_020251013.1?report=genbank&log$=prottop&blast_rank=96&RID=S1E5S1RS016","XP_020251013.1")
PREDICTED: eukaryotic initiation factor 4A-11 [Vitis vinifera]	Vitis vinifera	822	822	1	0	95.64	413	https://www.ncbi.nlm.nih.gov/protein/XP_002278119.1?report=genbank&log$=prottop&blast_rank=97&RID=S1E5S1RS016","XP_002278119.1")
PREDICTED: eukaryotic initiation factor 4A-2-like [Erythranthe guttata]	Erythranthe guttata	822	822	1	0	96.13	413	https://www.ncbi.nlm.nih.gov/protein/XP_012847101.1?report=genbank&log$=prottop&blast_rank=98&RID=S1E5S1RS016","XP_012847101.1")
hypothetical protein SDJN03_26102 [Cucurbita argyrosperma subsp. sororia]	Cucurbita argyrosperma subsp. sororia	822	822	1	0	95.64	483	https://www.ncbi.nlm.nih.gov/protein/KAG6575463.1?report=genbank&log$=prottop&blast_rank=99&RID=S1E5S1RS016","KAG6575463.1")
eukaryotic initiation factor 4A-14 [Telopea speciosissima]	Telopea speciosissima	822	822	1	0	95.16	413	https://www.ncbi.nlm.nih.gov/protein/XP_043706464.1?report=genbank&log$=prottop&blast_rank=100&RID=S1E5S1RS016","XP_043706464.1")

## Sheet: KZV18901.1
S1E55H6A013-Alignment-Descriptions
Description	Scientific Name	Max Score	Total Score	Query Cover	E value	Per. ident	Acc. Len	Accession
hypothetical protein F511_12006 [Dorcoceras hygrometricum]	Dorcoceras hygrometricum	853	853	1	0	100	413	https://www.ncbi.nlm.nih.gov/protein/KZV18901.1?report=genbank&log$=prottop&blast_rank=1&RID=S1E55H6A013","KZV18901.1")
hypothetical protein Pfo_019913 [Paulownia fortunei]	Paulownia fortunei	837	837	1	0	97.34	419	https://www.ncbi.nlm.nih.gov/protein/KAI3463250.1?report=genbank&log$=prottop&blast_rank=2&RID=S1E55H6A013","KAI3463250.1")
hypothetical protein Pfo_012247 [Paulownia fortunei]	Paulownia fortunei	832	832	1	0	96.37	413	https://www.ncbi.nlm.nih.gov/protein/KAI3455584.1?report=genbank&log$=prottop&blast_rank=3&RID=S1E55H6A013","KAI3455584.1")
eukaryotic initiation factor 4A-8 [Sesamum indicum]	Sesamum indicum	830	830	1	0	96.61	413	https://www.ncbi.nlm.nih.gov/protein/XP_011079970.1?report=genbank&log$=prottop&blast_rank=4&RID=S1E55H6A013","XP_011079970.1")
hypothetical protein BUALT_Bualt02G0122300 [Buddleja alternifolia]	Buddleja alternifolia	827	827	1	0	96.37	413	https://www.ncbi.nlm.nih.gov/protein/KAG8388403.1?report=genbank&log$=prottop&blast_rank=5&RID=S1E55H6A013","KAG8388403.1")
eukaryotic initiation factor 4A-2 [Carya illinoinensis]	Carya illinoinensis	818	818	1	0	94.92	413	https://www.ncbi.nlm.nih.gov/protein/XP_042965122.1?report=genbank&log$=prottop&blast_rank=6&RID=S1E55H6A013","XP_042965122.1")
eukaryotic initiation factor 4A-8 [Citrus clementina]	Citrus clementina	816	816	1	0	94.92	413	https://www.ncbi.nlm.nih.gov/protein/XP_006426588.1?report=genbank&log$=prottop&blast_rank=7&RID=S1E55H6A013","XP_006426588.1")
hypothetical protein F0562_022815 [Nyssa sinensis]	Nyssa sinensis	816	816	1	0	94.92	413	https://www.ncbi.nlm.nih.gov/protein/KAA8541663.1?report=genbank&log$=prottop&blast_rank=8&RID=S1E55H6A013","KAA8541663.1")
eukaryotic initiation factor 4A-8 [Ziziphus jujuba var. spinosa]	Ziziphus jujuba var. spinosa	816	816	1	0	94.92	413	https://www.ncbi.nlm.nih.gov/protein/XP_015890712.1?report=genbank&log$=prottop&blast_rank=9&RID=S1E55H6A013","XP_015890712.1")
Eukaryotic initiation factor 4A-1 [Striga hermonthica]	Striga hermonthica	816	816	0.99	0	96.09	442	https://www.ncbi.nlm.nih.gov/protein/CAA0814609.1?report=genbank&log$=prottop&blast_rank=10&RID=S1E55H6A013","CAA0814609.1")
eukaryotic initiation factor 4A-8-like [Andrographis paniculata]	Andrographis paniculata	816	816	1	0	93.96	414	https://www.ncbi.nlm.nih.gov/protein/XP_051135964.1?report=genbank&log$=prottop&blast_rank=11&RID=S1E55H6A013","XP_051135964.1")
eukaryotic initiation factor 4A-2 [Juglans regia]	Juglans regia	816	816	1	0	94.67	413	https://www.ncbi.nlm.nih.gov/protein/XP_018844689.1?report=genbank&log$=prottop&blast_rank=12&RID=S1E55H6A013","XP_018844689.1")
eukaryotic initiation factor 4A-8 [Sesamum indicum]	Sesamum indicum	816	816	1	0	95.16	412	https://www.ncbi.nlm.nih.gov/protein/XP_011072546.1?report=genbank&log$=prottop&blast_rank=13&RID=S1E55H6A013","XP_011072546.1")
PREDICTED: eukaryotic initiation factor 4A-10-like [Erythranthe guttata]	Erythranthe guttata	815	815	1	0	94.67	413	https://www.ncbi.nlm.nih.gov/protein/XP_012856560.1?report=genbank&log$=prottop&blast_rank=14&RID=S1E55H6A013","XP_012856560.1")
eukaryotic translation initiation factor 4A1 [Perilla frutescens var. hirtella]	Perilla frutescens var. hirtella	815	815	1	0	94.67	413	https://www.ncbi.nlm.nih.gov/protein/KAH6757720.1?report=genbank&log$=prottop&blast_rank=15&RID=S1E55H6A013","KAH6757720.1")
eukaryotic initiation factor 4A-14 [Phoenix dactylifera]	Phoenix dactylifera	815	815	1	0	94.43	413	https://www.ncbi.nlm.nih.gov/protein/XP_008798133.1?report=genbank&log$=prottop&blast_rank=16&RID=S1E55H6A013","XP_008798133.1")
eukaryotic initiation factor 4A-8 [Cucumis sativus]	Cucumis sativus	815	815	1	0	94.92	413	https://www.ncbi.nlm.nih.gov/protein/XP_004146811.1?report=genbank&log$=prottop&blast_rank=17&RID=S1E55H6A013","XP_004146811.1")
eukaryotic initiation factor 4A-9 [Juglans microcarpa x Juglans regia]	Juglans microcarpa x Juglans regia	814	814	1	0	94.43	413	https://www.ncbi.nlm.nih.gov/protein/XP_040997358.1?report=genbank&log$=prottop&blast_rank=18&RID=S1E55H6A013","XP_040997358.1")
eukaryotic initiation factor 4A [Striga asiatica]	Striga asiatica	814	814	1	0	95.64	411	https://www.ncbi.nlm.nih.gov/protein/GER28394.1?report=genbank&log$=prottop&blast_rank=19&RID=S1E55H6A013","GER28394.1")
PREDICTED: eukaryotic initiation factor 4A-8 [Fragaria vesca subsp. vesca]	Fragaria vesca subsp. vesca	814	814	1	0	94.19	413	https://www.ncbi.nlm.nih.gov/protein/XP_004303662.1?report=genbank&log$=prottop&blast_rank=20&RID=S1E55H6A013","XP_004303662.1")
eukaryotic initiation factor 4A-2 [Mangifera indica]	Mangifera indica	814	814	1	0	94.67	413	https://www.ncbi.nlm.nih.gov/protein/XP_044494887.1?report=genbank&log$=prottop&blast_rank=21&RID=S1E55H6A013","XP_044494887.1")
eukaryotic initiation factor 4a-11 [Quercus suber]	Quercus suber	813	813	1	0	93.95	464	https://www.ncbi.nlm.nih.gov/protein/POE79143.1?report=genbank&log$=prottop&blast_rank=22&RID=S1E55H6A013","POE79143.1")
eukaryotic initiation factor 4A-11 [Quercus lobata]	Quercus lobata	813	813	1	0	93.95	413	https://www.ncbi.nlm.nih.gov/protein/XP_030944971.1?report=genbank&log$=prottop&blast_rank=23&RID=S1E55H6A013","XP_030944971.1")
hypothetical protein CMV_011013 [Castanea mollissima]	Castanea mollissima	813	813	1	0	93.95	441	https://www.ncbi.nlm.nih.gov/protein/KAF3964719.1?report=genbank&log$=prottop&blast_rank=24&RID=S1E55H6A013","KAF3964719.1")
hypothetical protein RHMOL_Rhmol11G0096000 [Rhododendron molle]	Rhododendron molle	813	813	1	0	93.96	425	https://www.ncbi.nlm.nih.gov/protein/KAI8530898.1?report=genbank&log$=prottop&blast_rank=25&RID=S1E55H6A013","KAI8530898.1")
helicase [Cucumis melo subsp. melo]	Cucumis melo subsp. melo	813	813	1	0	94.43	413	https://www.ncbi.nlm.nih.gov/protein/ADN33729.1?report=genbank&log$=prottop&blast_rank=26&RID=S1E55H6A013","ADN33729.1")
eukaryotic initiation factor 4A-15-like [Dorcoceras hygrometricum]	Dorcoceras hygrometricum	813	813	1	0	93.95	413	https://www.ncbi.nlm.nih.gov/protein/KZV51860.1?report=genbank&log$=prottop&blast_rank=27&RID=S1E55H6A013","KZV51860.1")
hypothetical protein EZV62_003451 [Acer yangbiense]	Acer yangbiense	813	813	1	0	94.19	485	https://www.ncbi.nlm.nih.gov/protein/TXG68516.1?report=genbank&log$=prottop&blast_rank=28&RID=S1E55H6A013","TXG68516.1")
eukaryotic initiation factor 4A-8 [Elaeis guineensis]	Elaeis guineensis	813	813	1	0	94.19	413	https://www.ncbi.nlm.nih.gov/protein/XP_010915249.1?report=genbank&log$=prottop&blast_rank=29&RID=S1E55H6A013","XP_010915249.1")
hypothetical protein RHSIM_RhsimUnG0103600 [Rhododendron simsii]	Rhododendron simsii	813	813	1	0	93.96	414	https://www.ncbi.nlm.nih.gov/protein/KAF7113898.1?report=genbank&log$=prottop&blast_rank=30&RID=S1E55H6A013","KAF7113898.1")
hypothetical protein VITISV_040122 [Vitis vinifera]	Vitis vinifera	812	812	1	0	94.43	413	https://www.ncbi.nlm.nih.gov/protein/CAN61608.1?report=genbank&log$=prottop&blast_rank=31&RID=S1E55H6A013","CAN61608.1")
eukaryotic initiation factor 4A-8 isoform X1 [Abrus precatorius]	Abrus precatorius	812	812	1	0	93.95	413	https://www.ncbi.nlm.nih.gov/protein/XP_027351198.1?report=genbank&log$=prottop&blast_rank=32&RID=S1E55H6A013","XP_027351198.1")
eukaryotic initiation factor 4A-15 [Carya illinoinensis]	Carya illinoinensis	812	812	1	0	93.7	413	https://www.ncbi.nlm.nih.gov/protein/XP_042972482.1?report=genbank&log$=prottop&blast_rank=33&RID=S1E55H6A013","XP_042972482.1")
hypothetical protein HHK36_021839 [Tetracentron sinense]	Tetracentron sinense	812	812	1	0	94.43	413	https://www.ncbi.nlm.nih.gov/protein/KAF8393595.1?report=genbank&log$=prottop&blast_rank=34&RID=S1E55H6A013","KAF8393595.1")
eukaryotic initiation factor 4A-15-like [Carya illinoinensis]	Carya illinoinensis	812	812	1	0	94.19	413	https://www.ncbi.nlm.nih.gov/protein/XP_042961844.1?report=genbank&log$=prottop&blast_rank=35&RID=S1E55H6A013","XP_042961844.1")
hypothetical protein LWI28_021633 [Acer negundo]	Acer negundo	812	812	1	0	94.19	413	https://www.ncbi.nlm.nih.gov/protein/KAI9161882.1?report=genbank&log$=prottop&blast_rank=36&RID=S1E55H6A013","KAI9161882.1")
eukaryotic initiation factor 4A-8 [Benincasa hispida]	Benincasa hispida	812	812	1	0	94.43	413	https://www.ncbi.nlm.nih.gov/protein/XP_038887704.1?report=genbank&log$=prottop&blast_rank=37&RID=S1E55H6A013","XP_038887704.1")
eukaryotic initiation factor 4A-15-like [Phoenix dactylifera]	Phoenix dactylifera	812	812	1	0	93.7	413	https://www.ncbi.nlm.nih.gov/protein/XP_008793233.1?report=genbank&log$=prottop&blast_rank=38&RID=S1E55H6A013","XP_008793233.1")
Eukaryotic initiation factor 4A-8 [Spatholobus suberectus]	Spatholobus suberectus	812	812	1	0	93.7	413	https://www.ncbi.nlm.nih.gov/protein/TKY54465.1?report=genbank&log$=prottop&blast_rank=39&RID=S1E55H6A013","TKY54465.1")
eukaryotic initiation factor 4A-10-like isoform X1 [Salvia hispanica]	Salvia hispanica	812	812	1	0	94.2	419	https://www.ncbi.nlm.nih.gov/protein/XP_047962808.1?report=genbank&log$=prottop&blast_rank=40&RID=S1E55H6A013","XP_047962808.1")
eukaryotic initiation factor 4A-8 isoform X1 [Nicotiana tomentosiformis]	Nicotiana tomentosiformis	812	812	1	0	93.95	413	https://www.ncbi.nlm.nih.gov/protein/XP_009624936.1?report=genbank&log$=prottop&blast_rank=41&RID=S1E55H6A013","XP_009624936.1")
eukaryotic initiation factor 4A-8 [Momordica charantia]	Momordica charantia	811	811	1	0	94.43	413	https://www.ncbi.nlm.nih.gov/protein/XP_022152651.1?report=genbank&log$=prottop&blast_rank=42&RID=S1E55H6A013","XP_022152651.1")
hypothetical protein C3L33_21958 [Rhododendron williamsianum]	Rhododendron williamsianum	811	811	1	0	93.72	414	https://www.ncbi.nlm.nih.gov/protein/KAE9446144.1?report=genbank&log$=prottop&blast_rank=43&RID=S1E55H6A013","KAE9446144.1")
eukaryotic initiation factor 4A-11 [Quercus suber]	Quercus suber	811	811	1	0	93.95	413	https://www.ncbi.nlm.nih.gov/protein/XP_023877805.1?report=genbank&log$=prottop&blast_rank=44&RID=S1E55H6A013","XP_023877805.1")
hypothetical protein RHGRI_031336 [Rhododendron griersonianum]	Rhododendron griersonianum	811	811	1	0	93.72	425	https://www.ncbi.nlm.nih.gov/protein/KAG5524629.1?report=genbank&log$=prottop&blast_rank=45&RID=S1E55H6A013","KAG5524629.1")
eukaryotic initiation factor 4A-14 [Telopea speciosissima]	Telopea speciosissima	811	811	1	0	94.19	413	https://www.ncbi.nlm.nih.gov/protein/XP_043706464.1?report=genbank&log$=prottop&blast_rank=46&RID=S1E55H6A013","XP_043706464.1")
eukaryotic initiation factor 4A-15 [Populus trichocarpa]	Populus trichocarpa	811	811	1	0	93.7	413	https://www.ncbi.nlm.nih.gov/protein/XP_002324737.1?report=genbank&log$=prottop&blast_rank=47&RID=S1E55H6A013","XP_002324737.1")
hypothetical protein JHK87_024160 [Glycine soja]	Glycine soja	811	811	1	0	93.7	426	https://www.ncbi.nlm.nih.gov/protein/KAG4990703.1?report=genbank&log$=prottop&blast_rank=48&RID=S1E55H6A013","KAG4990703.1")
hypothetical protein DVH24_000403 [Malus domestica]	Malus domestica	811	811	1	0	93.7	426	https://www.ncbi.nlm.nih.gov/protein/RXH88804.1?report=genbank&log$=prottop&blast_rank=49&RID=S1E55H6A013","RXH88804.1")
Eukaryotic initiation factor 4A-11 [Vitis vinifera]	Vitis vinifera	811	811	1	0	94.19	423	https://www.ncbi.nlm.nih.gov/protein/RVW52337.1?report=genbank&log$=prottop&blast_rank=50&RID=S1E55H6A013","RVW52337.1")
hypothetical protein L3X38_016056 [Prunus dulcis]	Prunus dulcis	811	811	1	0	93.7	424	https://www.ncbi.nlm.nih.gov/protein/KAI5336787.1?report=genbank&log$=prottop&blast_rank=51&RID=S1E55H6A013","KAI5336787.1")
eukaryotic initiation factor 4A-8 [Elaeis guineensis]	Elaeis guineensis	811	811	1	0	93.95	413	https://www.ncbi.nlm.nih.gov/protein/XP_010925445.1?report=genbank&log$=prottop&blast_rank=52&RID=S1E55H6A013","XP_010925445.1")
Eukaryotic initiation factor 4A-1 [Striga hermonthica]	Striga hermonthica	811	811	1	0	93.7	413	https://www.ncbi.nlm.nih.gov/protein/CAA0821289.1?report=genbank&log$=prottop&blast_rank=53&RID=S1E55H6A013","CAA0821289.1")
eukaryotic initiation factor 4A-8 [Rosa chinensis]	Rosa chinensis	811	811	1	0	93.7	413	https://www.ncbi.nlm.nih.gov/protein/XP_024181185.1?report=genbank&log$=prottop&blast_rank=54&RID=S1E55H6A013","XP_024181185.1")
eukaryotic initiation factor 4A-10-like [Camellia sinensis]	Camellia sinensis	811	811	1	0	93.7	413	https://www.ncbi.nlm.nih.gov/protein/XP_028058558.1?report=genbank&log$=prottop&blast_rank=55&RID=S1E55H6A013","XP_028058558.1")
eukaryotic initiation factor 4A-15 [Juglans microcarpa x Juglans regia]	Juglans microcarpa x Juglans regia	811	811	1	0	94.19	413	https://www.ncbi.nlm.nih.gov/protein/XP_041017572.1?report=genbank&log$=prottop&blast_rank=56&RID=S1E55H6A013","XP_041017572.1")
PREDICTED: eukaryotic initiation factor 4A-11 [Vitis vinifera]	Vitis vinifera	811	811	1	0	94.19	413	https://www.ncbi.nlm.nih.gov/protein/XP_002278119.1?report=genbank&log$=prottop&blast_rank=57&RID=S1E55H6A013","XP_002278119.1")
hypothetical protein C3L33_21791 [Rhododendron williamsianum]	Rhododendron williamsianum	811	811	1	0	93.72	450	https://www.ncbi.nlm.nih.gov/protein/KAE9446309.1?report=genbank&log$=prottop&blast_rank=58&RID=S1E55H6A013","KAE9446309.1")
Eukaryotic initiation factor 4A-15 [Spatholobus suberectus]	Spatholobus suberectus	811	811	1	0	93.46	413	https://www.ncbi.nlm.nih.gov/protein/TKY72820.1?report=genbank&log$=prottop&blast_rank=59&RID=S1E55H6A013","TKY72820.1")
eukaryotic initiation factor 4A-10-like isoform X2 [Salvia hispanica]	Salvia hispanica	811	811	1	0	94.2	414	https://www.ncbi.nlm.nih.gov/protein/XP_047962809.1?report=genbank&log$=prottop&blast_rank=60&RID=S1E55H6A013","XP_047962809.1")
hypothetical protein SADUNF_Sadunf18G0045600 [Salix dunnii]	Salix dunnii	811	811	1	0	93.7	413	https://www.ncbi.nlm.nih.gov/protein/KAF9662364.1?report=genbank&log$=prottop&blast_rank=61&RID=S1E55H6A013","KAF9662364.1")
eukaryotic initiation factor 4A-15-like [Phoenix dactylifera]	Phoenix dactylifera	811	811	1	0	93.95	413	https://www.ncbi.nlm.nih.gov/protein/XP_008782542.1?report=genbank&log$=prottop&blast_rank=62&RID=S1E55H6A013","XP_008782542.1")
eukaryotic initiation factor 4A-15 isoform X1 [Pyrus x bretschneideri]	Pyrus x bretschneideri	810	810	1	0	93.7	420	https://www.ncbi.nlm.nih.gov/protein/XP_048443137.1?report=genbank&log$=prottop&blast_rank=63&RID=S1E55H6A013","XP_048443137.1")
hypothetical protein HHK36_032050 [Tetracentron sinense]	Tetracentron sinense	810	810	1	0	94.19	413	https://www.ncbi.nlm.nih.gov/protein/KAF8369922.1?report=genbank&log$=prottop&blast_rank=64&RID=S1E55H6A013","KAF8369922.1")
hypothetical protein RHSIM_Rhsim10G0168300 [Rhododendron simsii]	Rhododendron simsii	810	810	1	0	93.72	414	https://www.ncbi.nlm.nih.gov/protein/KAF7129665.1?report=genbank&log$=prottop&blast_rank=65&RID=S1E55H6A013","KAF7129665.1")
hypothetical protein DKX38_028059 [Salix brachista]	Salix brachista	810	810	1	0	93.46	413	https://www.ncbi.nlm.nih.gov/protein/KAB5514153.1?report=genbank&log$=prottop&blast_rank=66&RID=S1E55H6A013","KAB5514153.1")
eukaryotic initiation factor 4A-9-like [Populus alba]	Populus alba	810	810	1	0	93.22	413	https://www.ncbi.nlm.nih.gov/protein/XP_034890906.1?report=genbank&log$=prottop&blast_rank=67&RID=S1E55H6A013","XP_034890906.1")
Eukaryotic initiation factor 4A-1 [Striga hermonthica]	Striga hermonthica	810	810	1	0	94.67	480	https://www.ncbi.nlm.nih.gov/protein/CAA0821149.1?report=genbank&log$=prottop&blast_rank=68&RID=S1E55H6A013","CAA0821149.1")
hypothetical protein M9H77_19530 [Catharanthus roseus]	Catharanthus roseus	810	810	1	0	93.46	413	https://www.ncbi.nlm.nih.gov/protein/KAI5669677.1?report=genbank&log$=prottop&blast_rank=69&RID=S1E55H6A013","KAI5669677.1")
hypothetical protein H0E87_011981 [Populus deltoides]	Populus deltoides	810	810	1	0	93.22	413	https://www.ncbi.nlm.nih.gov/protein/KAH8504560.1?report=genbank&log$=prottop&blast_rank=70&RID=S1E55H6A013","KAH8504560.1")
Helicase [Macleaya cordata]	Macleaya cordata	810	810	1	0	94.19	413	https://www.ncbi.nlm.nih.gov/protein/OVA04463.1?report=genbank&log$=prottop&blast_rank=71&RID=S1E55H6A013","OVA04463.1")
eukaryotic initiation factor 4A-8 [Malus domestica]	Malus domestica	810	810	1	0	93.7	413	https://www.ncbi.nlm.nih.gov/protein/XP_008392378.1?report=genbank&log$=prottop&blast_rank=72&RID=S1E55H6A013","XP_008392378.1")
Eukaryotic initiation factor 4A-15 [Glycine max]	Glycine max	810	810	1	0	93.7	493	https://www.ncbi.nlm.nih.gov/protein/KAH1232203.1?report=genbank&log$=prottop&blast_rank=73&RID=S1E55H6A013","KAH1232203.1")
eukaryotic initiation factor 4A-8 [Cucurbita moschata]	Cucurbita moschata	810	810	1	0	93.95	413	https://www.ncbi.nlm.nih.gov/protein/XP_022955890.1?report=genbank&log$=prottop&blast_rank=74&RID=S1E55H6A013","XP_022955890.1")
hypothetical protein FH972_017976 [Carpinus fangiana]	Carpinus fangiana	810	810	1	0	94.19	413	https://www.ncbi.nlm.nih.gov/protein/KAE8100043.1?report=genbank&log$=prottop&blast_rank=75&RID=S1E55H6A013","KAE8100043.1")
PREDICTED: eukaryotic initiation factor 4A-15 [Populus euphratica]	Populus euphratica	810	810	1	0	93.46	413	https://www.ncbi.nlm.nih.gov/protein/XP_011038130.1?report=genbank&log$=prottop&blast_rank=76&RID=S1E55H6A013","XP_011038130.1")
eukaryotic initiation factor 4A-11 [Prunus persica]	Prunus persica	810	810	1	0	93.7	413	https://www.ncbi.nlm.nih.gov/protein/XP_007215455.1?report=genbank&log$=prottop&blast_rank=77&RID=S1E55H6A013","XP_007215455.1")
eukaryotic initiation factor 4A-14 [Sesamum indicum]	Sesamum indicum	810	810	1	0	93.7	413	https://www.ncbi.nlm.nih.gov/protein/XP_011100200.1?report=genbank&log$=prottop&blast_rank=78&RID=S1E55H6A013","XP_011100200.1")
eukaryotic initiation factor 4A-2 [Tripterygium wilfordii]	Tripterygium wilfordii	810	810	1	0	93.46	417	https://www.ncbi.nlm.nih.gov/protein/KAF5743176.1?report=genbank&log$=prottop&blast_rank=79&RID=S1E55H6A013","KAF5743176.1")
eukaryotic initiation factor 4A-15 [Juglans regia]	Juglans regia	810	810	1	0	93.95	413	https://www.ncbi.nlm.nih.gov/protein/XP_018835118.1?report=genbank&log$=prottop&blast_rank=80&RID=S1E55H6A013","XP_018835118.1")
eukaryotic initiation factor 4A-8 [Cucumis melo]	Cucumis melo	810	810	1	0	93.95	413	https://www.ncbi.nlm.nih.gov/protein/XP_008447621.2?report=genbank&log$=prottop&blast_rank=81&RID=S1E55H6A013","XP_008447621.2")
PREDICTED: eukaryotic initiation factor 4A-8 [Nicotiana sylvestris]	Nicotiana sylvestris	810	810	1	0	93.7	413	https://www.ncbi.nlm.nih.gov/protein/XP_009798256.1?report=genbank&log$=prottop&blast_rank=82&RID=S1E55H6A013","XP_009798256.1")
eukaryotic initiation factor 4A-8-like [Cucurbita moschata]	Cucurbita moschata	810	810	1	0	94.43	413	https://www.ncbi.nlm.nih.gov/protein/XP_022948836.1?report=genbank&log$=prottop&blast_rank=83&RID=S1E55H6A013","XP_022948836.1")
hypothetical protein H0E87_029724 [Populus deltoides]	Populus deltoides	810	810	1	0	93.46	413	https://www.ncbi.nlm.nih.gov/protein/KAH8482389.1?report=genbank&log$=prottop&blast_rank=84&RID=S1E55H6A013","KAH8482389.1")
eukaryotic initiation factor 4A-8 [Mangifera indica]	Mangifera indica	810	810	1	0	93.95	413	https://www.ncbi.nlm.nih.gov/protein/XP_044487544.1?report=genbank&log$=prottop&blast_rank=85&RID=S1E55H6A013","XP_044487544.1")
PREDICTED: eukaryotic initiation factor 4A-2 [Daucus carota subsp. sativus]	Daucus carota subsp. sativus	810	810	1	0	93.46	413	https://www.ncbi.nlm.nih.gov/protein/XP_017230682.1?report=genbank&log$=prottop&blast_rank=86&RID=S1E55H6A013","XP_017230682.1")
eukaryotic translation initiation factor 4A1 [Prunus dulcis]	Prunus dulcis	810	810	1	0	93.7	437	https://www.ncbi.nlm.nih.gov/protein/BBG98833.1?report=genbank&log$=prottop&blast_rank=87&RID=S1E55H6A013","BBG98833.1")
hypothetical protein Vadar_008461 [Vaccinium darrowii]	Vaccinium darrowii	810	810	1	0	93.72	414	https://www.ncbi.nlm.nih.gov/protein/KAH7833652.1?report=genbank&log$=prottop&blast_rank=88&RID=S1E55H6A013","KAH7833652.1")
eukaryotic initiation factor 4A-8-like isoform X1 [Tripterygium wilfordii]	Tripterygium wilfordii	810	810	1	0	93.95	417	https://www.ncbi.nlm.nih.gov/protein/KAF5727862.1?report=genbank&log$=prottop&blast_rank=89&RID=S1E55H6A013","KAF5727862.1")
eukaryotic initiation factor 4A-8 isoform X2 [Pyrus x bretschneideri]	Pyrus x bretschneideri	810	810	1	0	93.7	413	https://www.ncbi.nlm.nih.gov/protein/XP_009372398.1?report=genbank&log$=prottop&blast_rank=90&RID=S1E55H6A013","XP_009372398.1")
hypothetical protein Pfo_010821 [Paulownia fortunei]	Paulownia fortunei	810	810	1	0	93.22	413	https://www.ncbi.nlm.nih.gov/protein/KAI3454158.1?report=genbank&log$=prottop&blast_rank=91&RID=S1E55H6A013","KAI3454158.1")
eukaryotic initiation factor 4A-2 [Elaeis guineensis]	Elaeis guineensis	810	810	1	0	93.7	413	https://www.ncbi.nlm.nih.gov/protein/XP_010929386.1?report=genbank&log$=prottop&blast_rank=92&RID=S1E55H6A013","XP_010929386.1")
eukaryotic initiation factor 4A-2 [Tripterygium wilfordii]	Tripterygium wilfordii	810	810	1	0	93.46	413	https://www.ncbi.nlm.nih.gov/protein/XP_038711660.1?report=genbank&log$=prottop&blast_rank=93&RID=S1E55H6A013","XP_038711660.1")
Eukaryotic initiation factor 4A-15 [Ananas comosus]	Ananas comosus	810	810	1	0	93.22	413	https://www.ncbi.nlm.nih.gov/protein/OAY82321.1?report=genbank&log$=prottop&blast_rank=94&RID=S1E55H6A013","OAY82321.1")
eukaryotic initiation factor 4A-8 [Malus domestica]	Malus domestica	809	809	1	0	93.46	413	https://www.ncbi.nlm.nih.gov/protein/XP_008379513.1?report=genbank&log$=prottop&blast_rank=95&RID=S1E55H6A013","XP_008379513.1")
eukaryotic initiation factor 4A-14-like [Tripterygium wilfordii]	Tripterygium wilfordii	809	809	1	0	93.95	413	https://www.ncbi.nlm.nih.gov/protein/XP_038694653.1?report=genbank&log$=prottop&blast_rank=96&RID=S1E55H6A013","XP_038694653.1")
eukaryotic initiation factor 4A [Striga asiatica]	Striga asiatica	809	809	0.99	0	95.62	529	https://www.ncbi.nlm.nih.gov/protein/GER53537.1?report=genbank&log$=prottop&blast_rank=97&RID=S1E55H6A013","GER53537.1")
eukaryotic initiation factor 4a [Aglaia stellatopilosa]	Aglaia stellatopilosa	809	809	1	0	93.22	413	https://www.ncbi.nlm.nih.gov/protein/UVW56392.1?report=genbank&log$=prottop&blast_rank=98&RID=S1E55H6A013","UVW56392.1")
eukaryotic initiation factor 4A-8 [Nicotiana tabacum]	Nicotiana tabacum	809	809	1	0	93.46	413	https://www.ncbi.nlm.nih.gov/protein/NP_001313012.1?report=genbank&log$=prottop&blast_rank=99&RID=S1E55H6A013","NP_001313012.1")
eukaryotic initiation factor 4A-9 [Populus trichocarpa]	Populus trichocarpa	809	809	1	0	92.98	413	https://www.ncbi.nlm.nih.gov/protein/XP_002308545.1?report=genbank&log$=prottop&blast_rank=100&RID=S1E55H6A013","XP_002308545.1")

## Sheet: KZV14262.1
S1ERHJ3N013-Alignment-Descriptions
Description	Scientific Name	Max Score	Total Score	Query Cover	E value	Per. ident	Acc. Len	Accession
triosephosphate isomerase [Dorcoceras hygrometricum]	Dorcoceras hygrometricum	439	439	1	1e-155	100	216	https://www.ncbi.nlm.nih.gov/protein/KZV14262.1?report=genbank&log$=prottop&blast_rank=1&RID=S1ERHJ3N013","KZV14262.1")
triosephosphate isomerase, cytosolic-like [Dorcoceras hygrometricum]	Dorcoceras hygrometricum	429	429	1	5e-151	97.22	241	https://www.ncbi.nlm.nih.gov/protein/KZV35724.1?report=genbank&log$=prottop&blast_rank=2&RID=S1ERHJ3N013","KZV35724.1")
hypothetical protein Pfo_015357 [Paulownia fortunei]	Paulownia fortunei	402	402	1	6e-140	88.43	254	https://www.ncbi.nlm.nih.gov/protein/KAI3458694.1?report=genbank&log$=prottop&blast_rank=3&RID=S1ERHJ3N013","KAI3458694.1")
triosephosphate isomerase, cytosolic [Olea europaea subsp. europaea]	Olea europaea subsp. europaea	397	397	1	5e-138	87.96	254	https://www.ncbi.nlm.nih.gov/protein/CAA2998718.1?report=genbank&log$=prottop&blast_rank=4&RID=S1ERHJ3N013","CAA2998718.1")
triosephosphate isomerase, cytosolic-like [Olea europaea var. sylvestris]	Olea europaea var. sylvestris	395	395	1	7e-138	87.5	223	https://www.ncbi.nlm.nih.gov/protein/XP_022890941.1?report=genbank&log$=prottop&blast_rank=5&RID=S1ERHJ3N013","XP_022890941.1")
triosephosphate isomerase, cytosolic [Sesamum indicum]	Sesamum indicum	392	392	1	3e-136	86.11	254	https://www.ncbi.nlm.nih.gov/protein/XP_011077218.1?report=genbank&log$=prottop&blast_rank=6&RID=S1ERHJ3N013","XP_011077218.1")
unnamed protein product [Linum tenue]	Linum tenue	390	390	1	5e-136	83.8	218	https://www.ncbi.nlm.nih.gov/protein/CAI0411306.1?report=genbank&log$=prottop&blast_rank=7&RID=S1ERHJ3N013","CAI0411306.1")
hypothetical protein BUALT_Bualt06G0046100 [Buddleja alternifolia]	Buddleja alternifolia	390	390	1	2e-135	86.11	254	https://www.ncbi.nlm.nih.gov/protein/KAG8380728.1?report=genbank&log$=prottop&blast_rank=8&RID=S1ERHJ3N013","KAG8380728.1")
unnamed protein product [Linum tenue]	Linum tenue	389	389	1	2e-135	83.33	218	https://www.ncbi.nlm.nih.gov/protein/CAI0411978.1?report=genbank&log$=prottop&blast_rank=9&RID=S1ERHJ3N013","CAI0411978.1")
triosephosphate isomerase, cytosolic [Coffea arabica]	Coffea arabica	390	390	1	3e-135	84.72	254	https://www.ncbi.nlm.nih.gov/protein/XP_027104449.1?report=genbank&log$=prottop&blast_rank=10&RID=S1ERHJ3N013","XP_027104449.1")
Triosephosphate isomerase, cytosolic [Datura stramonium]	Datura stramonium	389	389	1	4e-135	85.65	254	https://www.ncbi.nlm.nih.gov/protein/MCD7468554.1?report=genbank&log$=prottop&blast_rank=11&RID=S1ERHJ3N013","MCD7468554.1")
unnamed protein product [Linum tenue]	Linum tenue	389	389	1	7e-135	83.8	254	https://www.ncbi.nlm.nih.gov/protein/CAI0411307.1?report=genbank&log$=prottop&blast_rank=12&RID=S1ERHJ3N013","CAI0411307.1")
hypothetical protein SLEP1_g5745 [Shorea leprosula]	Shorea leprosula	388	388	1	2e-134	84.72	256	https://www.ncbi.nlm.nih.gov/protein/GKU91942.1?report=genbank&log$=prottop&blast_rank=13&RID=S1ERHJ3N013","GKU91942.1")
triosephosphate isomerase, cytosolic [Capsicum annuum]	Capsicum annuum	388	388	1	2e-134	84.72	254	https://www.ncbi.nlm.nih.gov/protein/NP_001311909.1?report=genbank&log$=prottop&blast_rank=14&RID=S1ERHJ3N013","NP_001311909.1")
unnamed protein product [Linum tenue]	Linum tenue	387	387	1	3e-134	83.33	254	https://www.ncbi.nlm.nih.gov/protein/CAI0411975.1?report=genbank&log$=prottop&blast_rank=15&RID=S1ERHJ3N013","CAI0411975.1")
unnamed protein product [Coffea canephora]	Coffea canephora	387	387	1	3e-134	84.26	254	https://www.ncbi.nlm.nih.gov/protein/CDP00096.1?report=genbank&log$=prottop&blast_rank=16&RID=S1ERHJ3N013","CDP00096.1")
triosephosphate isomerase, cytosolic [Mangifera indica]	Mangifera indica	387	387	1	3e-134	83.8	254	https://www.ncbi.nlm.nih.gov/protein/XP_044462165.1?report=genbank&log$=prottop&blast_rank=17&RID=S1ERHJ3N013","XP_044462165.1")
triosephosphate isomerase, cytosolic-like [Coffea arabica]	Coffea arabica	387	387	1	4e-134	84.72	254	https://www.ncbi.nlm.nih.gov/protein/XP_027111000.1?report=genbank&log$=prottop&blast_rank=18&RID=S1ERHJ3N013","XP_027111000.1")
triosephosphate isomerase, cytosolic [Olea europaea var. sylvestris]	Olea europaea var. sylvestris	387	387	0.99	4e-134	85.58	254	https://www.ncbi.nlm.nih.gov/protein/XP_022880204.1?report=genbank&log$=prottop&blast_rank=19&RID=S1ERHJ3N013","XP_022880204.1")
triosephosphate isomerase, cytosolic [Andrographis paniculata]	Andrographis paniculata	387	387	0.99	5e-134	83.72	254	https://www.ncbi.nlm.nih.gov/protein/XP_051143169.1?report=genbank&log$=prottop&blast_rank=20&RID=S1ERHJ3N013","XP_051143169.1")
Triosephosphate isomerase [Corchorus olitorius]	Corchorus olitorius	386	386	1	6e-134	83.8	254	https://www.ncbi.nlm.nih.gov/protein/OMO96833.1?report=genbank&log$=prottop&blast_rank=21&RID=S1ERHJ3N013","OMO96833.1")
triosephosphate isomerase, cytosolic-like [Coffea eugenioides]	Coffea eugenioides	386	386	1	7e-134	83.8	254	https://www.ncbi.nlm.nih.gov/protein/XP_027161003.1?report=genbank&log$=prottop&blast_rank=22&RID=S1ERHJ3N013","XP_027161003.1")
triosephosphate isomerase [Striga asiatica]	Striga asiatica	386	386	0.95	1e-133	87.92	254	https://www.ncbi.nlm.nih.gov/protein/GER57530.1?report=genbank&log$=prottop&blast_rank=23&RID=S1ERHJ3N013","GER57530.1")
Triosephosphate isomerase- cytosolic [Striga hermonthica]	Striga hermonthica	386	386	0.95	1e-133	87.92	254	https://www.ncbi.nlm.nih.gov/protein/CAA0820864.1?report=genbank&log$=prottop&blast_rank=24&RID=S1ERHJ3N013","CAA0820864.1")
PREDICTED: triosephosphate isomerase, cytosolic isoform X1 [Nicotiana sylvestris]	Nicotiana sylvestris	385	385	1	1e-133	82.87	254	https://www.ncbi.nlm.nih.gov/protein/XP_009793252.1?report=genbank&log$=prottop&blast_rank=25&RID=S1ERHJ3N013","XP_009793252.1")
triosephosphate isomerase, cytosolic [Coffea eugenioides]	Coffea eugenioides	385	385	1	1e-133	83.8	254	https://www.ncbi.nlm.nih.gov/protein/XP_027160357.1?report=genbank&log$=prottop&blast_rank=26&RID=S1ERHJ3N013","XP_027160357.1")
PREDICTED: triosephosphate isomerase, cytosolic [Erythranthe guttata]	Erythranthe guttata	385	385	1	2e-133	84.72	254	https://www.ncbi.nlm.nih.gov/protein/XP_012858305.1?report=genbank&log$=prottop&blast_rank=27&RID=S1ERHJ3N013","XP_012858305.1")
PREDICTED: triosephosphate isomerase, cytosolic [Nicotiana attenuata]	Nicotiana attenuata	385	385	1	2e-133	83.33	254	https://www.ncbi.nlm.nih.gov/protein/XP_019224789.1?report=genbank&log$=prottop&blast_rank=28&RID=S1ERHJ3N013","XP_019224789.1")
triosephosphate isomerase, cytosolic-like [Nicotiana tabacum]	Nicotiana tabacum	385	385	1	2e-133	82.87	253	https://www.ncbi.nlm.nih.gov/protein/NP_001312678.1?report=genbank&log$=prottop&blast_rank=29&RID=S1ERHJ3N013","NP_001312678.1")
triosephosphate isomerase, cytosolic [Durio zibethinus]	Durio zibethinus	385	385	0.99	2e-133	84.65	254	https://www.ncbi.nlm.nih.gov/protein/XP_022746439.1?report=genbank&log$=prottop&blast_rank=30&RID=S1ERHJ3N013","XP_022746439.1")
uncharacterized protein J3R85_004590 [Psidium guajava]	Psidium guajava	385	385	1	2e-133	83.8	254	https://www.ncbi.nlm.nih.gov/protein/KAI3439593.1?report=genbank&log$=prottop&blast_rank=31&RID=S1ERHJ3N013","KAI3439593.1")
Triosephosphate isomerase- cytosolic [Striga hermonthica]	Striga hermonthica	385	385	0.95	2e-133	87.44	254	https://www.ncbi.nlm.nih.gov/protein/CAA0820500.1?report=genbank&log$=prottop&blast_rank=32&RID=S1ERHJ3N013","CAA0820500.1")
triosephosphate isomerase, cytosolic [Ricinus communis]	Ricinus communis	384	384	0.99	4e-133	84.65	254	https://www.ncbi.nlm.nih.gov/protein/XP_002533147.1?report=genbank&log$=prottop&blast_rank=33&RID=S1ERHJ3N013","XP_002533147.1")
PREDICTED: triosephosphate isomerase, cytosolic isoform X1 [Nicotiana tabacum]	Nicotiana tabacum	384	384	0.99	4e-133	82.79	254	https://www.ncbi.nlm.nih.gov/protein/XP_016513736.1?report=genbank&log$=prottop&blast_rank=34&RID=S1ERHJ3N013","XP_016513736.1")
PREDICTED: triosephosphate isomerase, cytosolic isoform X2 [Nicotiana tabacum]	Nicotiana tabacum	384	384	0.99	5e-133	82.79	253	https://www.ncbi.nlm.nih.gov/protein/XP_016513737.1?report=genbank&log$=prottop&blast_rank=35&RID=S1ERHJ3N013","XP_016513737.1")
triosephosphate isomerase, cytosolic-like [Mangifera indica]	Mangifera indica	384	384	1	5e-133	83.33	254	https://www.ncbi.nlm.nih.gov/protein/XP_044507482.1?report=genbank&log$=prottop&blast_rank=36&RID=S1ERHJ3N013","XP_044507482.1")
triosephosphate isomerase, cytosolic [Beta vulgaris subsp. vulgaris]	Beta vulgaris subsp. vulgaris	384	384	0.99	6e-133	82.79	253	https://www.ncbi.nlm.nih.gov/protein/XP_010690624.1?report=genbank&log$=prottop&blast_rank=37&RID=S1ERHJ3N013","XP_010690624.1")
unnamed protein product [Cuscuta campestris]	Cuscuta campestris	384	384	1	6e-133	83.8	254	https://www.ncbi.nlm.nih.gov/protein/VFQ99414.1?report=genbank&log$=prottop&blast_rank=38&RID=S1ERHJ3N013","VFQ99414.1")
triosephosphate isomerase, cytosolic [Punica granatum]	Punica granatum	384	384	1	6e-133	84.26	254	https://www.ncbi.nlm.nih.gov/protein/XP_031375135.1?report=genbank&log$=prottop&blast_rank=39&RID=S1ERHJ3N013","XP_031375135.1")
triosephosphate isomerase, cytosolic [Prunus persica]	Prunus persica	384	384	1	7e-133	83.8	254	https://www.ncbi.nlm.nih.gov/protein/XP_007218840.1?report=genbank&log$=prottop&blast_rank=40&RID=S1ERHJ3N013","XP_007218840.1")
hypothetical protein SLEP1_g37498 [Shorea leprosula]	Shorea leprosula	384	384	1	7e-133	83.8	254	https://www.ncbi.nlm.nih.gov/protein/GKV28439.1?report=genbank&log$=prottop&blast_rank=41&RID=S1ERHJ3N013","GKV28439.1")
hypothetical protein BT93_J0071 [Corymbia citriodora subsp. variegata]	Corymbia citriodora subsp. variegata	384	384	1	7e-133	83.33	254	https://www.ncbi.nlm.nih.gov/protein/KAF8008961.1?report=genbank&log$=prottop&blast_rank=42&RID=S1ERHJ3N013","KAF8008961.1")
triosephosphate isomerase, cytosolic isoform X1 [Nicotiana tomentosiformis]	Nicotiana tomentosiformis	384	384	1	7e-133	82.41	254	https://www.ncbi.nlm.nih.gov/protein/XP_009587902.1?report=genbank&log$=prottop&blast_rank=43&RID=S1ERHJ3N013","XP_009587902.1")
triosephosphate isomerase, cytosolic isoform X2 [Nicotiana tomentosiformis]	Nicotiana tomentosiformis	384	384	1	9e-133	82.41	253	https://www.ncbi.nlm.nih.gov/protein/XP_009587903.1?report=genbank&log$=prottop&blast_rank=44&RID=S1ERHJ3N013","XP_009587903.1")
triosephosphate isomerase, cytosolic [Manihot esculenta]	Manihot esculenta	383	383	1	1e-132	83.8	254	https://www.ncbi.nlm.nih.gov/protein/XP_021618896.1?report=genbank&log$=prottop&blast_rank=45&RID=S1ERHJ3N013","XP_021618896.1")
triosephosphate isomerase, cytosolic [Solanum verrucosum]	Solanum verrucosum	383	383	1	1e-132	83.33	254	https://www.ncbi.nlm.nih.gov/protein/XP_049354484.1?report=genbank&log$=prottop&blast_rank=46&RID=S1ERHJ3N013","XP_049354484.1")
Triosephosphate isomerase [Actinidia chinensis var. chinensis]	Actinidia chinensis var. chinensis	383	383	0.99	2e-132	83.72	255	https://www.ncbi.nlm.nih.gov/protein/PSR93106.1?report=genbank&log$=prottop&blast_rank=47&RID=S1ERHJ3N013","PSR93106.1")
triosephosphate isomerase, cytosolic [Olea europaea subsp. europaea]	Olea europaea subsp. europaea	382	382	0.99	2e-132	84.65	254	https://www.ncbi.nlm.nih.gov/protein/CAA3024428.1?report=genbank&log$=prottop&blast_rank=48&RID=S1ERHJ3N013","CAA3024428.1")
triosephosphate isomerase, cytosolic [Solanum tuberosum]	Solanum tuberosum	382	382	1	2e-132	83.33	254	https://www.ncbi.nlm.nih.gov/protein/NP_001305511.1?report=genbank&log$=prottop&blast_rank=49&RID=S1ERHJ3N013","NP_001305511.1")
triosephosphate isomerase, cytosolic [Solanum lycopersicum]	Solanum lycopersicum	382	382	1	2e-132	83.33	254	https://www.ncbi.nlm.nih.gov/protein/XP_004236746.1?report=genbank&log$=prottop&blast_rank=50&RID=S1ERHJ3N013","XP_004236746.1")
RecName: Full=Triosephosphate isomerase, cytosolic; Short=TIM; Short=Triose-phosphate isomerase [Petunia x hybrida]	Petunia x hybrida	382	382	1	2e-132	82.41	254	https://www.ncbi.nlm.nih.gov/protein/P48495.1?report=genbank&log$=prottop&blast_rank=51&RID=S1ERHJ3N013","P48495.1")
Triosephosphate isomerase family protein [Salix suchowensis]	Salix suchowensis	382	382	1	2e-132	83.33	254	https://www.ncbi.nlm.nih.gov/protein/KAG5237578.1?report=genbank&log$=prottop&blast_rank=52&RID=S1ERHJ3N013","KAG5237578.1")
triosephosphate isomerase [Perilla frutescens var. frutescens]	Perilla frutescens var. frutescens	382	382	1	2e-132	82.87	254	https://www.ncbi.nlm.nih.gov/protein/KAH6802374.1?report=genbank&log$=prottop&blast_rank=53&RID=S1ERHJ3N013","KAH6802374.1")
triosephosphate isomerase, cytosolic [Durio zibethinus]	Durio zibethinus	382	382	1	3e-132	83.8	254	https://www.ncbi.nlm.nih.gov/protein/XP_022765166.1?report=genbank&log$=prottop&blast_rank=54&RID=S1ERHJ3N013","XP_022765166.1")
hypothetical protein KY285_019671 [Solanum tuberosum]	Solanum tuberosum	382	382	1	3e-132	83.33	254	https://www.ncbi.nlm.nih.gov/protein/KAH0692574.1?report=genbank&log$=prottop&blast_rank=55&RID=S1ERHJ3N013","KAH0692574.1")
triosephosphate isomerase cytosolic [Prunus yedoensis var. nudiflora]	Prunus yedoensis var. nudiflora	382	382	0.99	3e-132	83.72	254	https://www.ncbi.nlm.nih.gov/protein/PQP99901.1?report=genbank&log$=prottop&blast_rank=56&RID=S1ERHJ3N013","PQP99901.1")
triosephosphate isomerase, cytosolic [Jatropha curcas]	Jatropha curcas	382	382	1	3e-132	84.72	254	https://www.ncbi.nlm.nih.gov/protein/XP_012089190.1?report=genbank&log$=prottop&blast_rank=57&RID=S1ERHJ3N013","XP_012089190.1")
hypothetical protein Leryth_007460 [Lithospermum erythrorhizon]	Lithospermum erythrorhizon	382	382	1	3e-132	83.33	254	https://www.ncbi.nlm.nih.gov/protein/KAG9138838.1?report=genbank&log$=prottop&blast_rank=58&RID=S1ERHJ3N013","KAG9138838.1")
Triosephosphate isomerase [Handroanthus impetiginosus]	Handroanthus impetiginosus	382	382	0.95	3e-132	87.92	254	https://www.ncbi.nlm.nih.gov/protein/PIN01783.1?report=genbank&log$=prottop&blast_rank=59&RID=S1ERHJ3N013","PIN01783.1")
triosephosphate isomerase [Perilla frutescens var. hirtella]	Perilla frutescens var. hirtella	382	382	1	3e-132	82.87	254	https://www.ncbi.nlm.nih.gov/protein/KAH6827242.1?report=genbank&log$=prottop&blast_rank=60&RID=S1ERHJ3N013","KAH6827242.1")
hypothetical protein EJD97_018834 [Solanum chilense]	Solanum chilense	382	382	1	3e-132	83.33	254	https://www.ncbi.nlm.nih.gov/protein/TMW88259.1?report=genbank&log$=prottop&blast_rank=61&RID=S1ERHJ3N013","TMW88259.1")
triosephosphate isomerase, cytosolic [Solanum pennellii]	Solanum pennellii	382	382	1	4e-132	82.87	254	https://www.ncbi.nlm.nih.gov/protein/XP_015073709.1?report=genbank&log$=prottop&blast_rank=62&RID=S1ERHJ3N013","XP_015073709.1")
hypothetical protein GBA52_006903 [Prunus armeniaca]	Prunus armeniaca	382	382	1	4e-132	83.33	254	https://www.ncbi.nlm.nih.gov/protein/KAH0979726.1?report=genbank&log$=prottop&blast_rank=63&RID=S1ERHJ3N013","KAH0979726.1")
triosephosphate isomerase, cytosolic [Malus sylvestris]	Malus sylvestris	382	382	1	4e-132	83.33	254	https://www.ncbi.nlm.nih.gov/protein/XP_050148720.1?report=genbank&log$=prottop&blast_rank=64&RID=S1ERHJ3N013","XP_050148720.1")
triosephosphate isomerase, cytosolic [Zingiber officinale]	Zingiber officinale	382	382	1	5e-132	84.72	254	https://www.ncbi.nlm.nih.gov/protein/XP_042464584.1?report=genbank&log$=prottop&blast_rank=65&RID=S1ERHJ3N013","XP_042464584.1")
hypothetical protein DVH24_023090 [Malus domestica]	Malus domestica	382	382	1	5e-132	83.33	254	https://www.ncbi.nlm.nih.gov/protein/RXI08946.1?report=genbank&log$=prottop&blast_rank=66&RID=S1ERHJ3N013","RXI08946.1")
triosephosphate isomerase, cytosolic [Morus notabilis]	Morus notabilis	382	382	1	5e-132	83.8	254	https://www.ncbi.nlm.nih.gov/protein/XP_010111131.1?report=genbank&log$=prottop&blast_rank=67&RID=S1ERHJ3N013","XP_010111131.1")
hypothetical protein C1H46_007221 [Malus baccata]	Malus baccata	382	382	1	5e-132	83.33	254	https://www.ncbi.nlm.nih.gov/protein/TQE07168.1?report=genbank&log$=prottop&blast_rank=68&RID=S1ERHJ3N013","TQE07168.1")
hypothetical protein MLD38_018937 [Melastoma candidum]	Melastoma candidum	381	381	1	6e-132	82.87	254	https://www.ncbi.nlm.nih.gov/protein/KAI4370600.1?report=genbank&log$=prottop&blast_rank=69&RID=S1ERHJ3N013","KAI4370600.1")
triosephosphate isomerase [Perilla frutescens var. hirtella]	Perilla frutescens var. hirtella	381	381	1	6e-132	82.41	254	https://www.ncbi.nlm.nih.gov/protein/KAH6762679.1?report=genbank&log$=prottop&blast_rank=70&RID=S1ERHJ3N013","KAH6762679.1")
triosephosphate isomerase, cytosolic [Zingiber officinale]	Zingiber officinale	381	381	1	6e-132	84.72	254	https://www.ncbi.nlm.nih.gov/protein/XP_042428714.1?report=genbank&log$=prottop&blast_rank=71&RID=S1ERHJ3N013","XP_042428714.1")
triosephosphate isomerase [Actinidia rufa]	Actinidia rufa	381	381	0.99	7e-132	83.26	255	https://www.ncbi.nlm.nih.gov/protein/GFZ14916.1?report=genbank&log$=prottop&blast_rank=72&RID=S1ERHJ3N013","GFZ14916.1")
triose phosphate isomerase cytosolic isoform [Solanum chacoense]	Solanum chacoense	381	381	1	8e-132	82.87	254	https://www.ncbi.nlm.nih.gov/protein/AAR11379.1?report=genbank&log$=prottop&blast_rank=73&RID=S1ERHJ3N013","AAR11379.1")
PREDICTED: triosephosphate isomerase, cytosolic [Prunus mume]	Prunus mume	381	381	1	9e-132	83.33	254	https://www.ncbi.nlm.nih.gov/protein/XP_008233628.1?report=genbank&log$=prottop&blast_rank=74&RID=S1ERHJ3N013","XP_008233628.1")
hypothetical protein JRO89_XS14G0067800 [Xanthoceras sorbifolium]	Xanthoceras sorbifolium	381	381	1	1e-131	82.41	254	https://www.ncbi.nlm.nih.gov/protein/KAH7548107.1?report=genbank&log$=prottop&blast_rank=75&RID=S1ERHJ3N013","KAH7548107.1")
hypothetical protein I3760_01G284700 [Carya illinoinensis]	Carya illinoinensis	381	381	0.99	1e-131	83.26	254	https://www.ncbi.nlm.nih.gov/protein/KAG2730270.1?report=genbank&log$=prottop&blast_rank=76&RID=S1ERHJ3N013","KAG2730270.1")
triosephosphate isomerase, cytosolic [Carya illinoinensis]	Carya illinoinensis	380	380	0.99	1e-131	83.26	254	https://www.ncbi.nlm.nih.gov/protein/XP_042954648.1?report=genbank&log$=prottop&blast_rank=77&RID=S1ERHJ3N013","XP_042954648.1")
triosephosphate isomerase, cytosolic [Ipomoea triloba]	Ipomoea triloba	380	380	0.99	1e-131	83.26	253	https://www.ncbi.nlm.nih.gov/protein/XP_031107398.1?report=genbank&log$=prottop&blast_rank=78&RID=S1ERHJ3N013","XP_031107398.1")
triosephosphate isomerase, cytosolic-like [Malus sylvestris]	Malus sylvestris	380	380	1	2e-131	82.87	254	https://www.ncbi.nlm.nih.gov/protein/XP_050155668.1?report=genbank&log$=prottop&blast_rank=79&RID=S1ERHJ3N013","XP_050155668.1")
hypothetical protein EUGRSUZ_J00008 [Eucalyptus grandis]	Eucalyptus grandis	380	380	1	2e-131	82.41	254	https://www.ncbi.nlm.nih.gov/protein/KCW50199.1?report=genbank&log$=prottop&blast_rank=80&RID=S1ERHJ3N013","KCW50199.1")
triosephosphate isomerase [Pyrus ussuriensis x Pyrus communis]	Pyrus ussuriensis x Pyrus communis	380	380	1	2e-131	82.87	260	https://www.ncbi.nlm.nih.gov/protein/KAB2596134.1?report=genbank&log$=prottop&blast_rank=81&RID=S1ERHJ3N013","KAB2596134.1")
triosephosphate isomerase, cytosolic-like [Malus domestica]	Malus domestica	380	380	1	2e-131	82.87	254	https://www.ncbi.nlm.nih.gov/protein/XP_008371752.1?report=genbank&log$=prottop&blast_rank=82&RID=S1ERHJ3N013","XP_008371752.1")
hypothetical protein CXB51_024853 [Gossypium anomalum]	Gossypium anomalum	380	380	1	2e-131	83.33	254	https://www.ncbi.nlm.nih.gov/protein/KAG8480256.1?report=genbank&log$=prottop&blast_rank=83&RID=S1ERHJ3N013","KAG8480256.1")
triosephosphate isomerase, cytosolic [Pyrus x bretschneideri]	Pyrus x bretschneideri	380	380	1	2e-131	82.87	254	https://www.ncbi.nlm.nih.gov/protein/XP_009343505.1?report=genbank&log$=prottop&blast_rank=84&RID=S1ERHJ3N013","XP_009343505.1")
hypothetical protein J1N35_036379 [Gossypium stocksii]	Gossypium stocksii	380	380	1	3e-131	82.87	254	https://www.ncbi.nlm.nih.gov/protein/KAH1045595.1?report=genbank&log$=prottop&blast_rank=85&RID=S1ERHJ3N013","KAH1045595.1")
hypothetical protein FNV43_RR24806 [Rhamnella rubrinervis]	Rhamnella rubrinervis	380	380	1	3e-131	81.94	254	https://www.ncbi.nlm.nih.gov/protein/KAF3433703.1?report=genbank&log$=prottop&blast_rank=86&RID=S1ERHJ3N013","KAF3433703.1")
triosephosphate isomerase, cytosolic [Elaeis guineensis]	Elaeis guineensis	379	379	1	3e-131	83.33	254	https://www.ncbi.nlm.nih.gov/protein/XP_010920579.1?report=genbank&log$=prottop&blast_rank=87&RID=S1ERHJ3N013","XP_010920579.1")
unnamed protein product [Arabis nemorensis]	Arabis nemorensis	379	379	1	4e-131	81.02	254	https://www.ncbi.nlm.nih.gov/protein/VVB05762.1?report=genbank&log$=prottop&blast_rank=88&RID=S1ERHJ3N013","VVB05762.1")
triosephosphate isomerase, cytosolic [Malus domestica]	Malus domestica	379	379	1	4e-131	82.87	254	https://www.ncbi.nlm.nih.gov/protein/XP_008370609.1?report=genbank&log$=prottop&blast_rank=89&RID=S1ERHJ3N013","XP_008370609.1")
PREDICTED: triosephosphate isomerase, cytosolic [Theobroma cacao]	Theobroma cacao	379	379	1	5e-131	82.87	254	https://www.ncbi.nlm.nih.gov/protein/XP_017985155.1?report=genbank&log$=prottop&blast_rank=90&RID=S1ERHJ3N013","XP_017985155.1")
triosephosphate isomerase, cytosolic [Gossypium hirsutum]	Gossypium hirsutum	379	379	1	6e-131	82.87	254	https://www.ncbi.nlm.nih.gov/protein/NP_001314307.2?report=genbank&log$=prottop&blast_rank=91&RID=S1ERHJ3N013","NP_001314307.2")
triosephosphate isomerase, cytosolic [Rosa chinensis]	Rosa chinensis	379	379	0.99	6e-131	81.86	253	https://www.ncbi.nlm.nih.gov/protein/XP_024179335.1?report=genbank&log$=prottop&blast_rank=92&RID=S1ERHJ3N013","XP_024179335.1")
PREDICTED: triosephosphate isomerase, cytosolic [Musa acuminata subsp. malaccensis]	Musa acuminata subsp. malaccensis	379	379	0.97	7e-131	84.83	254	https://www.ncbi.nlm.nih.gov/protein/XP_009384877.1?report=genbank&log$=prottop&blast_rank=93&RID=S1ERHJ3N013","XP_009384877.1")
triosephosphate isomerase, cytosolic [Herrania umbratica]	Herrania umbratica	379	379	1	8e-131	83.8	254	https://www.ncbi.nlm.nih.gov/protein/XP_021295575.1?report=genbank&log$=prottop&blast_rank=94&RID=S1ERHJ3N013","XP_021295575.1")
Triosephosphate isomerase [Actinidia chinensis var. chinensis]	Actinidia chinensis var. chinensis	379	379	0.99	8e-131	82.33	254	https://www.ncbi.nlm.nih.gov/protein/PSS34533.1?report=genbank&log$=prottop&blast_rank=95&RID=S1ERHJ3N013","PSS34533.1")
triosephosphate isomerase, cytosolic [Cannabis sativa]	Cannabis sativa	379	379	1	9e-131	81.94	254	https://www.ncbi.nlm.nih.gov/protein/XP_030489407.1?report=genbank&log$=prottop&blast_rank=96&RID=S1ERHJ3N013","XP_030489407.1")
triosephosphate isomerase, cytosolic [Pistacia vera]	Pistacia vera	378	378	1	9e-131	82.41	254	https://www.ncbi.nlm.nih.gov/protein/XP_031259617.1?report=genbank&log$=prottop&blast_rank=97&RID=S1ERHJ3N013","XP_031259617.1")
triosephosphate isomerase [Gossypium hirsutum]	Gossypium hirsutum	378	378	1	1e-130	82.87	254	https://www.ncbi.nlm.nih.gov/protein/ACJ11723.1?report=genbank&log$=prottop&blast_rank=98&RID=S1ERHJ3N013","ACJ11723.1")
hypothetical protein N665_0034s0035 [Sinapis alba]	Sinapis alba	378	378	1	1e-130	81.48	254	https://www.ncbi.nlm.nih.gov/protein/KAF8114696.1?report=genbank&log$=prottop&blast_rank=99&RID=S1ERHJ3N013","KAF8114696.1")
triosephosphate isomerase, cytosolic [Juglans regia]	Juglans regia	378	378	1	1e-130	82.87	254	https://www.ncbi.nlm.nih.gov/protein/XP_018814537.1?report=genbank&log$=prottop&blast_rank=100&RID=S1ERHJ3N013","XP_018814537.1")

[truncated: 4 more sheets: KZV28384.1, KZV47616.1, A0A2Z7AJ43, Q27U82]
